# Supplementary material for: The cyclin dependent kinase inhibitor Roscovitine prevents diet-induced metabolic disruption in obese mice
Source: PubMed Central journal article supplement (PMC8514475; doi:10.1038/s41598-021-99871-z), 2021-10-13
Supplement: 41598_2021_99871_MOESM1_ESM.pdf [file 41598_2021_99871_MOESM1_ESM.pdf]

**Supplementary Material to:**

**The cyclin dependent kinase inhibitor Roscovitine prevents diet-induced metabolic disruption in obese mice**

Nabil Rabhi<sup>1</sup>, Kathleen Desevin<sup>1</sup>, Briana Noel Cortez<sup>1</sup>, Ryan Hekman<sup>2</sup>, Jean Z. Lin<sup>1</sup>, Andrew Emili<sup>2</sup> and Stephen R. Farmer<sup>1\*</sup>

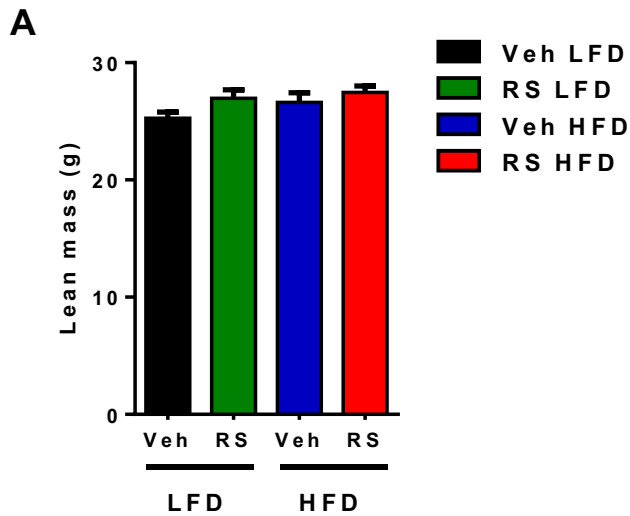

**Figure S1: (A)** Fat mass determined by nuclear magnetic resonance (NMR) in 19-20 weeks LFD and HFD fed mice treated for 6 weeks with roscovitine or vehicle (n = 5 / group).

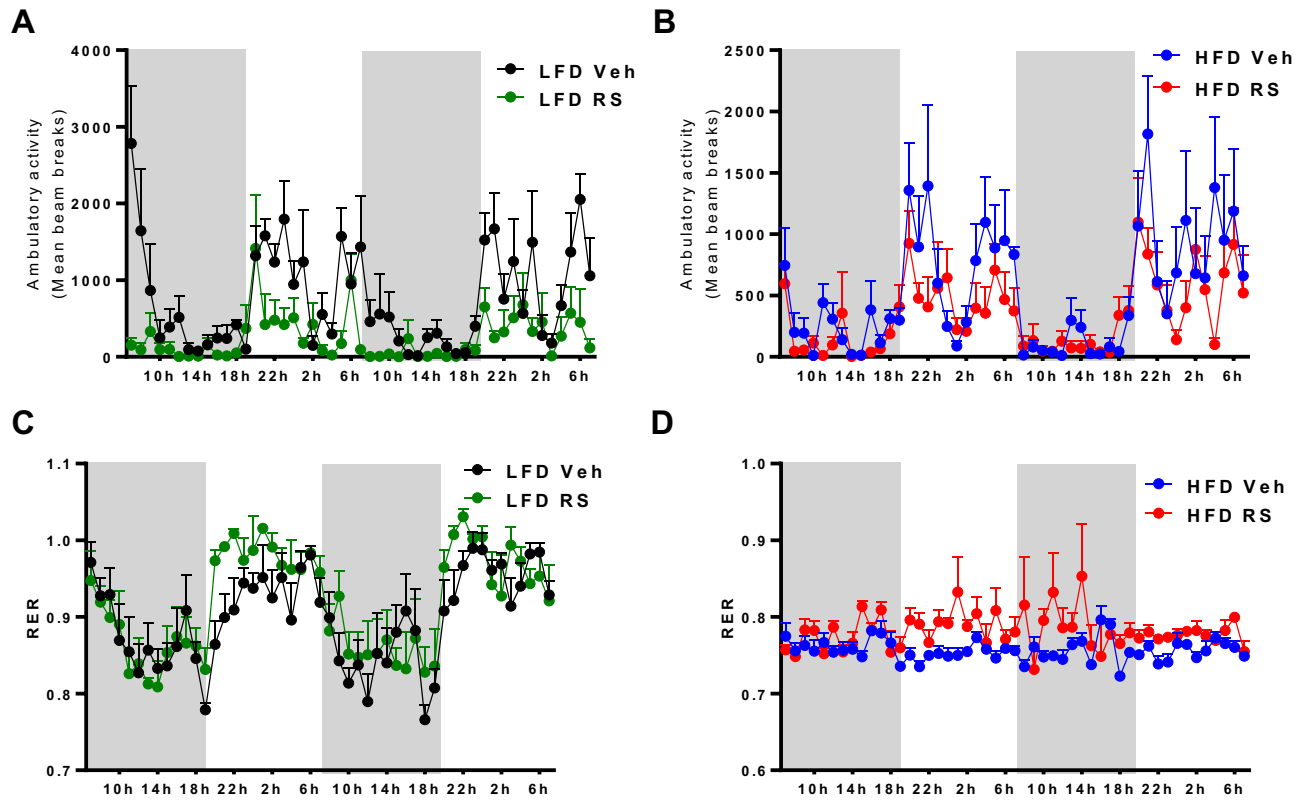

**Figure S2: (A, B)** Ambulatory activity measured by CLAMS in 19-20 weeks LFD **(A)** and HFD **(B)** fed mice treated for 6 weeks with roscovitine or vehicle ( $n = 5$  / group). **(C, D)** Respiratory exchange ratio (RER) measured by CLAMS in 19-20 weeks LFD **(C)** and HFD **(D)** fed mice treated for 6 weeks with roscovitine or vehicle ( $n = 5$  / group).

**A**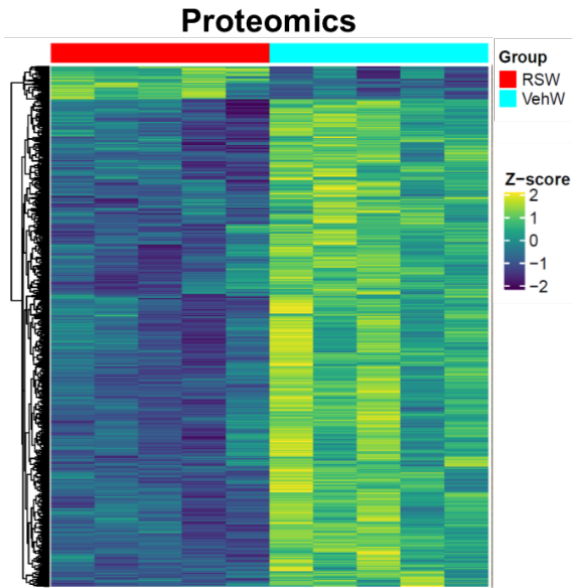**B**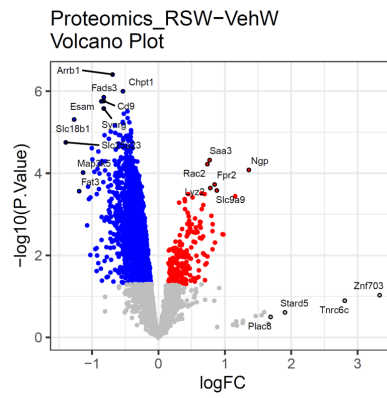**C**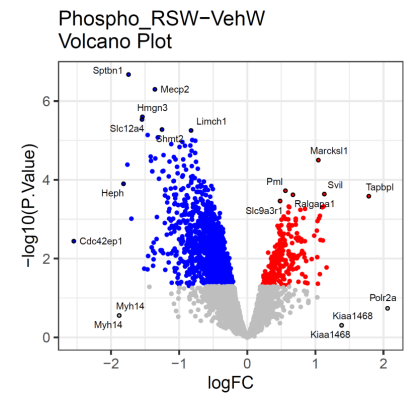**D**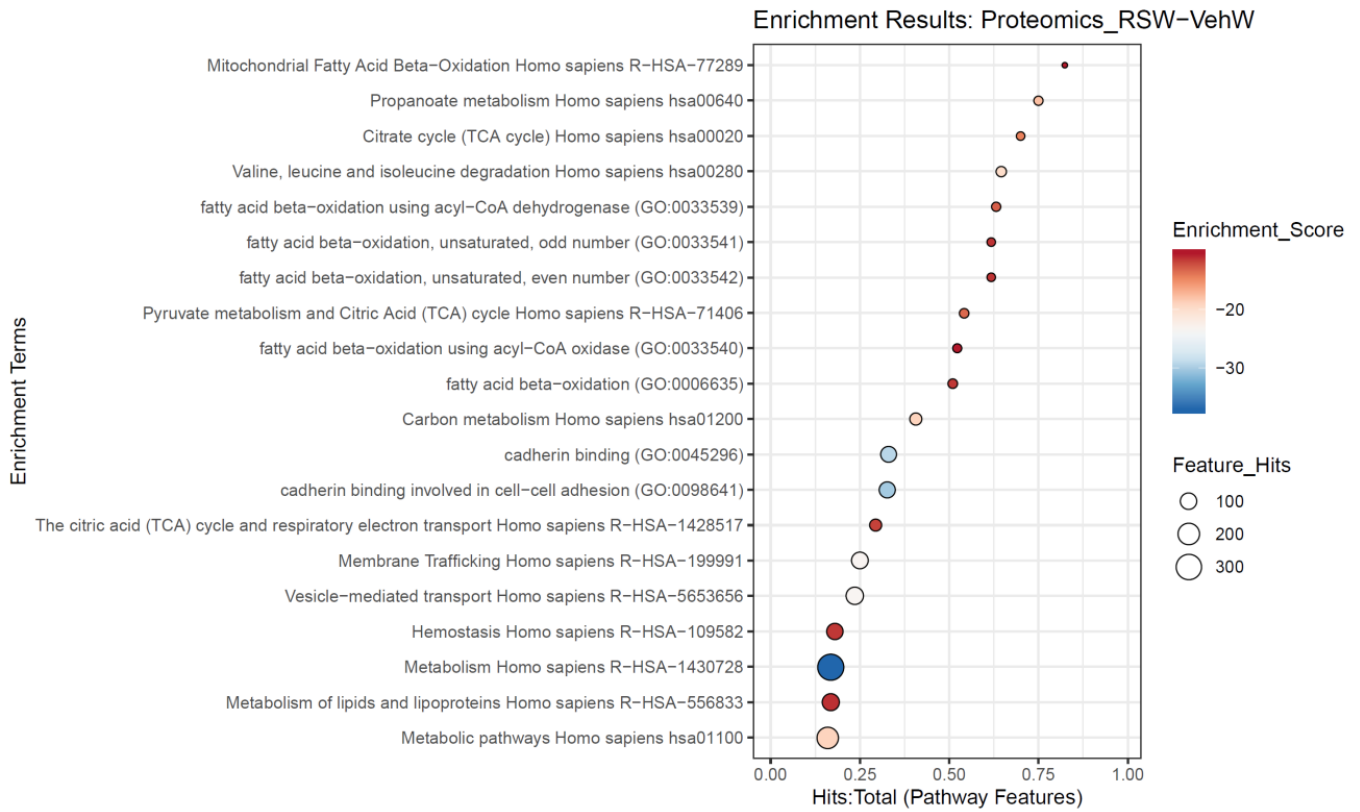



regulated proteins and phosphoproteins in response to roscovitine treatment in eWAT from HFD mice visualized with Cytoscape Enrichment Map. Each node corresponds to a gene set either up-regulated (red) or down-regulated (blue). Edges (bleu lines) link sets with shared genes, and thickness of lines correlates with the number of genes in common between two sets. Only gene sets with  $FDR < 0.05$  and  $p < 0.01$  were included in visualizations.

**A**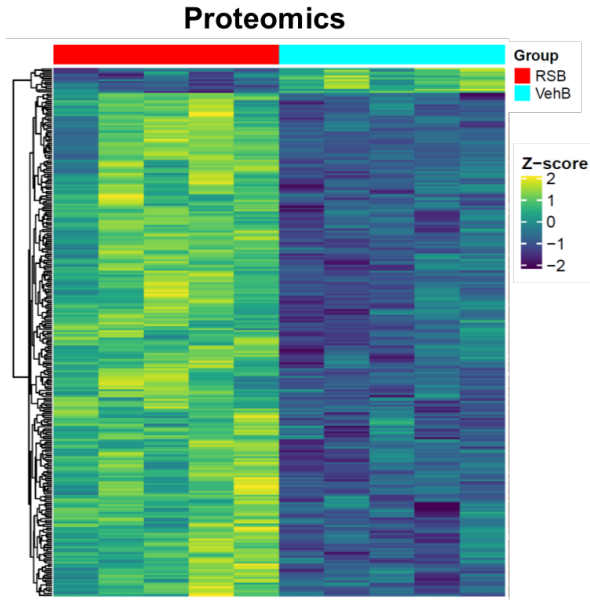**B**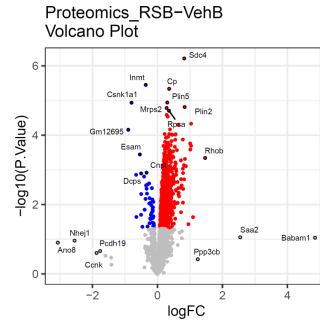**C**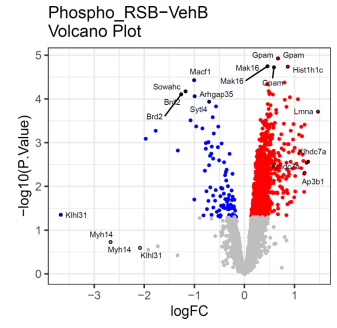**D**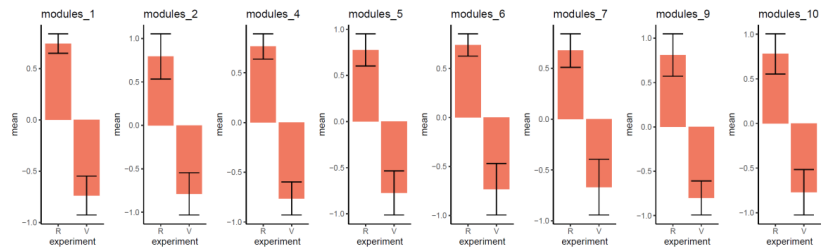**E**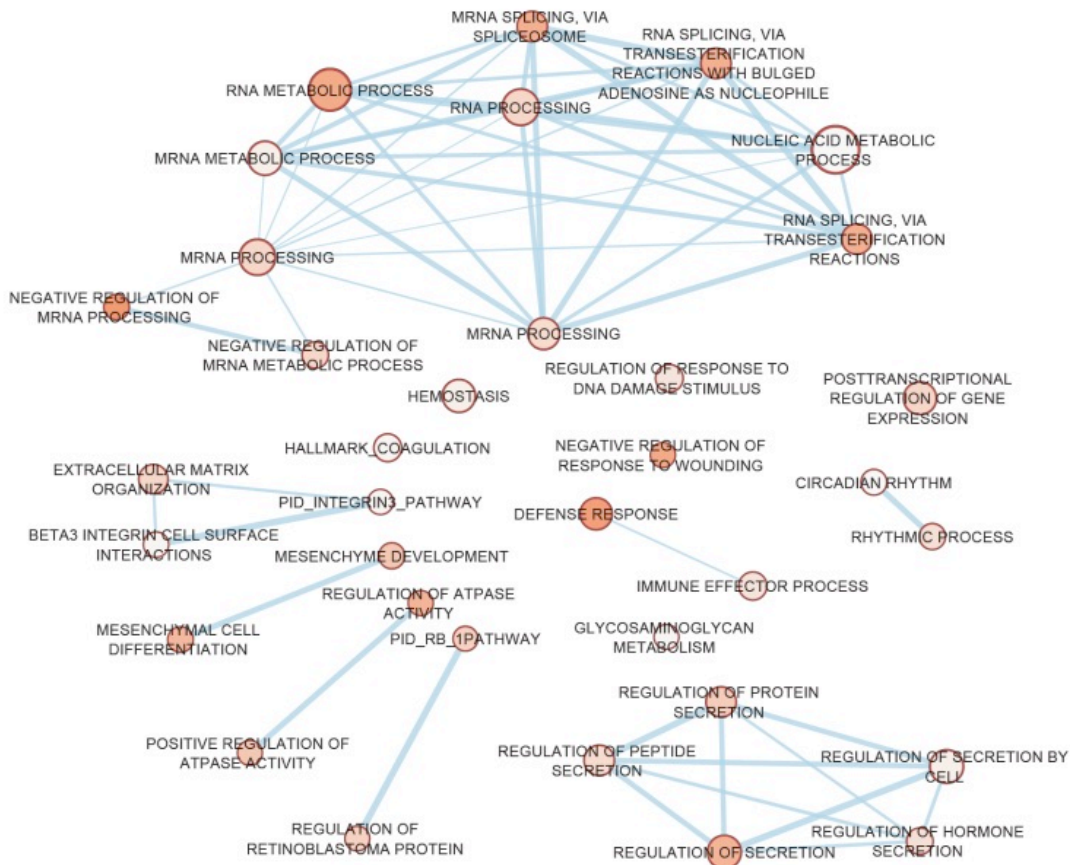

**Figure S4:** (A) Heatmap of differential proteome in BAT of 19-20 weeks LFD and HFD fed mice treated for 6 weeks with roscovitine or vehicle (n = 5 / group). (B) Volcano plot of up- and down-regulated proteins in BAT from HFD mice treated with roscovitine compared to vehicle treated. (C) Volcano plot of up- and down-regulated phosphoproteins in BAT from HFD mice treated with roscovitine compared to vehicle treated. (D) Summary of kinase substrates proteins. Bar plots of mean of the phosphosites in each module are summarized for each condition. (E) Results of gene set enrichment analysis (GSEA) of up regulated proteins and phosphoproteins in response to roscovitine treatment in BAT from HFD mice visualized with Cytoscape Enrichment Map. Each node corresponds to a gene set either up-regulated (red) or down-regulated (blue). Edges (blue lines) link sets with shared genes, and thickness of lines correlates with the number of genes in common between two sets. Only gene sets with FDR < 0.05 and p < 0.01 were included in visualizations.

**Table S3: SYBR green primers list**

|          |                            |
|----------|----------------------------|
| Fas F    | AGCTGCAACTGTGCAAGGGTCTG    |
| Fas R    | TTGCCCAAGCATTGCCGCCTT      |
| Scd 1 F  | TTCTTGCGATACTCTGGTGC       |
| Scd 1 R  | CGGGATTGAATGTTCTTGTCGT     |
| Acc 1 F  | ATGGGCGGAATGGTCTCTTTC      |
| Acc 1 R  | TGGGGACCTTGTCTTCATCAT      |
| Acc2 F   | CCTTTGGCAACAAGCAAGGTA      |
| Acc 2    | AGTCGTACACATAGGTGGTCC      |
| Col1a1 F | TAAGGGTCCCCAATGGTGAGA      |
| Col1a1 R | GGGTCCCTCGACTCCTACAT       |
| Col3a1 F | CTGTAACATGGAACTGGGGAAA     |
| Col3a1 R | CCATAGCTGAACTGAAAACCACC    |
| Col6a1 F | GACACCTCTCAGTGTGCTCTGT     |
| Col6a1 R | GCGATAAGCCTTGGCAGGAAATG    |
| Pgc1a F  | GAAAACAGGAACAGCAGCAGAG     |
| Pgc1a R  | GGGGTCAGAGGAAGAGATAAAG     |
| Dio 2 F  | CAGTGTGGTGCACGTCTCCAA TC   |
| Dio2 R   | TGAACCAAAGTTGACCACCAG      |
| UCP1 F   | TCCTAGGGACCATCACCACCC      |
| UCP1 R   | AGCCGGCTGAGATCTTGTTTCC     |
| Cox8b F  | GAA CCA TGA AGC CAA CGA CT |
| Cox8b R  | GCG AAG TTC ACA GTG GTT CC |
| Sma F    | GTCCCAGACATCAGGGAGTAA      |
| Sma R    | TCGGATACTTCAGCGTCAGGA      |
| Fn F     | ATGTGGACCCCTCCTGATAGT      |
| Fn R     | GCCCAGTGATTTACGCAAAGG      |
| Cd 9 F   | CTGGCATTGCAGTGCTTGCTA      |
| Cd 9 R   | AACCCGAAGAACAATCCCAGC      |
| Mcp1 F   | TTAAAAACCTGGATCGGAACCAA    |
| Mcp1 R   | GCATTAGCTTCAGATTTACGGGT    |
| Tnfa F   | GGTGCCTATGTCTCAGCCTCTT     |
| Tnfa R   | GCCATAGAACTGATGAGAGGGAG    |
| F4/80 F  | CGTGTGTTGGTGGCACTGTGA      |
