# Supplementary material for: The cyclin dependent kinase inhibitor Roscovitine prevents diet-induced metabolic disruption in obese mice
Source: Sci Rep. 2021 Oct 13;11:20365. doi: 10.1038/s41598-021-99871-z (PMC8514475; doi:10.1038/s41598-021-99871-z)
Supplement: Supplementary file 2 — Supplementary Information 2. [file 41598_2021_99871_MOESM2_ESM.xlsx]

## Sheet: Proteomics
	Normalized Log2 Intensity, Row Z Score														RSW-VehW													Normalized Log2 Intensity
FEATURE	RS1W	RS2W	RS3W	RS4W	RS5W	VEH1W	VEH2W	VEH3W	VEH4W	VEH5W	GENE	PROTEIN	UNIPROT	MAXFC	P.VALUE	ADJ.P.VAL	LOGFC	FASTA_HEADERS	UNIPROT_FUNCTION	UNIPROT_CELLULAR_LOCATION	UNIPROT_DISEASE	GO_BIOLOGICAL_PROCESS	GO_MOLECULAR_FUNCTION	GO_CELLULAR_COMPONENT	GO_ID	REACTOMEID	KEGG_ID	RS1W.1	RS2W.1	RS3W.1	RS4W.1	RS5W.1	VEH1W.1	VEH2W.1	VEH3W.1	VEH4W.1	VEH5W.1
Arrb1_Q8BWG8	-0.705438	-0.955799	-0.552923	-1.14005	-1.26252	0.782027	1.14652	0.765256	1.08165	0.841282	Arrb1	Beta-arrestin-1	Q8BWG8	1.04038	3.87637e-07	0.00173882	-0.690844	sp|Q8BWG8|ARRB1_MOUSE Beta-arrestin-1 OS=Mus musculus OX=10090 GN=Arrb1 PE=1 SV=1	FUNCTION: Functions in regulating agonist-mediated G-protein coupled receptor (GPCR) signaling by mediating both receptor desensitization and resensitization processes. During homologous desensitization, beta-arrestins bind to the GPRK-phosphorylated receptor and sterically preclude its coupling to the cognate G-protein; the binding appears to require additional receptor determinants exposed only…	SUBCELLULAR LOCATION: Cytoplasm {ECO:0000250}. Nucleus {ECO:0000250}. Cell membrane {ECO:0000250}. Membrane, clathrin-coated pit {ECO:0000305}. Cell projection, pseudopodium {ECO:0000250}. Cytoplasmic vesicle {ECO:0000250}. Note=Translocates to the plasma membrane and colocalizes with antagonist-stimulated GPCRs. The monomeric form is predominantly located in the nucleus. The oligomeric form is l…		activation of MAPK activity [GO:0000187]; endocytosis [GO:0006897]; follicle-stimulating hormone signaling pathway [GO:0042699]; G protein-coupled receptor internalization [GO:0002031]; G protein-coupled receptor signaling pathway [GO:0007186]; negative regulation of apoptotic process [GO:0043066]; negative regulation of cysteine-type endopeptidase activity involved in apoptotic process [GO:00431…	alpha-1A adrenergic receptor binding [GO:0031691]; alpha-1B adrenergic receptor binding [GO:0031692]; angiotensin receptor binding [GO:0031701]; AP-2 adaptor complex binding [GO:0035612]; arrestin family protein binding [GO:1990763]; clathrin adaptor activity [GO:0035615]; clathrin binding [GO:0030276]; cysteine-type endopeptidase inhibitor activity involved in apoptotic process [GO:0043027]; enz…	basolateral plasma membrane [GO:0016323]; chromatin [GO:0000785]; clathrin-coated pit [GO:0005905]; cytoplasm [GO:0005737]; cytoplasmic vesicle [GO:0031410]; cytosol [GO:0005829]; dendritic spine [GO:0043197]; endosome [GO:0005768]; nuclear body [GO:0016604]; nucleoplasm [GO:0005654]; nucleus [GO:0005634]; plasma membrane [GO:0005886]; postsynaptic density [GO:0014069]; postsynaptic membrane [GO:…	GO:0000187; GO:0000785; GO:0001664; GO:0001933; GO:0001934; GO:0002031; GO:0002092; GO:0003713; GO:0005096; GO:0005102; GO:0005159; GO:0005634; GO:0005654; GO:0005737; GO:0005768; GO:0005829; GO:0005886; GO:0005905; GO:0006355; GO:0006357; GO:0006511; GO:0006897; GO:0007186; GO:0007602; GO:0008134; GO:0008277; GO:0008284; GO:0014069; GO:0015031; GO:0016323; GO:0016567; GO:0016604; GO:0019899; GO:…	R-MMU-418555;R-MMU-432720;R-MMU-432722;R-MMU-456926;R-MMU-5635838;R-MMU-5674135;R-MMU-5689880;R-MMU-8856825;R-MMU-8856828;	mmu:109689;	17.1906	17.097	17.2477	17.0281	16.9822	17.7471	17.8835	17.7408	17.8592	17.7693
Chpt1_Q8C025	-0.723966	-1.01134	-0.814025	-1.08187	-1.00524	1.25839	0.522338	0.931899	1.09255	0.831259	Chpt1	Cholinephosphotransferase 1	Q8C025	1.03559	9.9247e-07	0.00173882	-0.535261	sp|Q8C025|CHPT1_MOUSE Cholinephosphotransferase 1 OS=Mus musculus OX=10090 GN=Chpt1 PE=1 SV=1	FUNCTION: Catalyzes phosphatidylcholine biosynthesis from CDP-choline. It thereby plays a central role in the formation and maintenance of vesicular membranes. {ECO:0000250|UniProtKB:Q8WUD6}.	SUBCELLULAR LOCATION: Golgi apparatus membrane {ECO:0000250|UniProtKB:Q8WUD6}; Multi-pass membrane protein {ECO:0000250|UniProtKB:Q8WUD6}.		phosphatidylcholine biosynthetic process [GO:0006656]; platelet activating factor biosynthetic process [GO:0006663]	diacylglycerol cholinephosphotransferase activity [GO:0004142]; metal ion binding [GO:0046872]; phosphotransferase activity, for other substituted phosphate groups [GO:0016780]	endoplasmic reticulum membrane [GO:0005789]; Golgi apparatus [GO:0005794]; Golgi membrane [GO:0000139]; integral component of membrane [GO:0016021]	GO:0000139; GO:0004142; GO:0005789; GO:0005794; GO:0006656; GO:0006663; GO:0016021; GO:0016780; GO:0046872	R-MMU-1483191;	mmu:212862;	15.0963	15.0133	15.0703	14.993	15.0151	15.6684	15.456	15.5742	15.6205	15.5451
Fads3_Q9JJE7	-1.55297	-0.930919	-0.511213	-0.97779	-0.555261	0.869651	0.901557	0.670147	1.02971	1.05709	Fads3	Fatty acid desaturase 3	Q9JJE7	1.06113	1.38462e-06	0.00173882	-0.823283	sp|Q9JJE7|FADS3_MOUSE Fatty acid desaturase 3 OS=Mus musculus OX=10090 GN=Fads3 PE=1 SV=2	FUNCTION: Mammals have different sphingoid bases that differ in their length and/or pattern of desaturation and hydroxyl groups. The predominant sphingoid base in mammalian ceramides is sphing-4-enine (sphingosine or SPH) which has a trans desaturation at carbon 4. FADS3 is a ceramide desaturase that introduces a cis double bond between carbon 14 and carbon 15 of the SPH-containing ceramides, pro…	SUBCELLULAR LOCATION: Endoplasmic reticulum membrane {ECO:0000250|UniProtKB:Q9Y5Q0}; Multi-pass membrane protein {ECO:0000255}.		sphingolipid metabolic process [GO:0006665]; unsaturated fatty acid biosynthetic process [GO:0006636]	oxidoreductase activity [GO:0016491]	endoplasmic reticulum membrane [GO:0005789]; integral component of membrane [GO:0016021]	GO:0005789; GO:0006636; GO:0006665; GO:0016021; GO:0016491		mmu:60527;	13.174	13.4567	13.6475	13.4354	13.6275	14.2751	14.2896	14.1845	14.3479	14.3603
Cd9_P40240	-0.915546	-1.11701	-0.682019	-1.1212	-0.680195	1.12162	0.936661	1.02551	0.20788	1.2243	Cd9	CD9 antigen	P40240	1.0579	1.72791e-06	0.00173882	-0.824253	sp|P40240|CD9_MOUSE CD9 antigen OS=Mus musculus OX=10090 GN=Cd9 PE=1 SV=2	FUNCTION: Integral membrane protein associated with integrins, which regulates different processes, such as sperm-egg fusion, platelet activation and aggregation, and cell adhesion (PubMed:10700183, PubMed:10634790, PubMed:10634791, PubMed:14715942). Present at the cell surface of oocytes and plays a key role in sperm-egg fusion, possibly by organizing multiprotein complexes and the morphology of…	SUBCELLULAR LOCATION: Cell membrane {ECO:0000269|PubMed:10518536, ECO:0000269|PubMed:10634791, ECO:0000269|PubMed:11805154, ECO:0000269|PubMed:23213457}; Multi-pass membrane protein {ECO:0000269|PubMed:11805154}. Membrane {ECO:0000269|PubMed:11805154}; Multi-pass membrane protein {ECO:0000269|PubMed:11805154}. Secreted, extracellular exosome {ECO:0000269|PubMed:26109643}. Note=Present at the cell…		brain development [GO:0007420]; cell adhesion [GO:0007155]; cellular response to low-density lipoprotein particle stimulus [GO:0071404]; fusion of sperm to egg plasma membrane involved in single fertilization [GO:0007342]; glial cell migration [GO:0008347]; myoblast fusion involved in skeletal muscle regeneration [GO:0014905]; negative regulation of cell population proliferation [GO:0008285]; neg…	integrin binding [GO:0005178]	apical plasma membrane [GO:0016324]; cell surface [GO:0009986]; external side of plasma membrane [GO:0009897]; extracellular exosome [GO:0070062]; integral component of plasma membrane [GO:0005887]; membrane [GO:0016020]; plasma membrane [GO:0005886]; protein-containing complex [GO:0032991]	GO:0005178; GO:0005886; GO:0005887; GO:0007155; GO:0007338; GO:0007342; GO:0007420; GO:0008285; GO:0008347; GO:0009414; GO:0009897; GO:0009986; GO:0014003; GO:0014905; GO:0016020; GO:0016324; GO:0030913; GO:0031623; GO:0032991; GO:0035036; GO:0051271; GO:0070062; GO:0071404; GO:0090331; GO:1905521	R-MMU-114608;R-MMU-1300645;	mmu:12527;	14.2302	14.1383	14.3368	14.1364	14.3376	15.1598	15.0754	15.1159	14.7428	15.2066
Esam_Q925F2	-0.690755	-1.27861	-1.25222	-0.68975	-0.598785	0.694372	1.24376	1.25458	0.744784	0.572621	Esam	Endothelial cell-selective adhesion molecule	Q925F2	1.05301	1.75674e-06	0.00173882	-0.858427	sp|Q925F2|ESAM_MOUSE Endothelial cell-selective adhesion molecule OS=Mus musculus OX=10090 GN=Esam PE=1 SV=1	FUNCTION: Can mediate aggregation most likely through a homophilic molecular interaction. {ECO:0000269|PubMed:11279107, ECO:0000269|PubMed:11847224}.	SUBCELLULAR LOCATION: Cell junction, adherens junction {ECO:0000305}. Cell junction, tight junction {ECO:0000305}. Cell membrane {ECO:0000305}; Single-pass type I membrane protein {ECO:0000305}.		bicellular tight junction assembly [GO:0070830]; calcium-independent cell-cell adhesion via plasma membrane cell-adhesion molecules [GO:0016338]; cell-cell adhesion [GO:0098609]; cellular protein localization [GO:0034613]; homophilic cell adhesion via plasma membrane adhesion molecules [GO:0007156]; regulation of actin cytoskeleton reorganization [GO:2000249]; regulation of actin filament polymer…	cell-cell adhesion mediator activity [GO:0098632]	adherens junction [GO:0005912]; bicellular tight junction [GO:0005923]; cell-cell junction [GO:0005911]; integral component of membrane [GO:0016021]; plasma membrane [GO:0005886]; protein-containing complex [GO:0032991]	GO:0005886; GO:0005911; GO:0005912; GO:0005923; GO:0007156; GO:0016021; GO:0016338; GO:0030833; GO:0032991; GO:0034613; GO:0070830; GO:0098609; GO:0098632; GO:2000249	R-MMU-202733;	mmu:69524;	16.2938	16.0141	16.0267	16.2943	16.3376	16.9529	17.2144	17.2195	16.9769	16.895
Synrg_Q5SV85	-0.687222	-0.877831	-0.57759	-1.20522	-1.14406	1.44507	0.895003	0.921828	0.326384	0.903632	Synrg	Synergin gamma	Q5SV85	1.0514	2.62246e-06	0.00216309	-0.824139	sp|Q5SV85|SYNRG_MOUSE Synergin gamma OS=Mus musculus OX=10090 GN=Synrg PE=1 SV=1	FUNCTION: May play a role in endocytosis and/or membrane trafficking at the trans-Golgi network (TGN). May act by linking the adapter protein complex AP-1 to other proteins (By similarity). {ECO:0000250}.	SUBCELLULAR LOCATION: Cytoplasm, cytosol {ECO:0000269|PubMed:12808037}. Golgi apparatus, trans-Golgi network membrane {ECO:0000269|PubMed:12808037}; Peripheral membrane protein {ECO:0000269|PubMed:12808037}. Note=Associated with membranes of the TGN, colocalizes with AP1G1 (By similarity). Associates with membranes via the adapter protein complex AP-1. {ECO:0000250}.		endocytosis [GO:0006897]; protein transport [GO:0015031]		clathrin coat of trans-Golgi network vesicle [GO:0030130]; cytosol [GO:0005829]	GO:0005829; GO:0006897; GO:0015031; GO:0030130		mmu:217030;	16.1317	16.0442	16.182	15.8941	15.9221	17.1097	16.8574	16.8697	16.5966	16.8614
Ano10_Q8BH79	-0.878049	-0.828123	-0.821396	-1.2071	-0.884899	1.29515	0.550939	1.11581	0.948255	0.709415	Ano10	Anoctamin-10	Q8BH79	1.02821	3.07082e-06	0.00217107	-0.466782	sp|Q8BH79|ANO10_MOUSE Anoctamin-10 OS=Mus musculus OX=10090 GN=Ano10 PE=1 SV=1	FUNCTION: Does not exhibit calcium-activated chloride channel (CaCC) activity. Can inhibit the activity of ANO1 (By similarity). {ECO:0000250}.	SUBCELLULAR LOCATION: Cell membrane {ECO:0000250}; Multi-pass membrane protein {ECO:0000250}. Note=Shows predominantly an intracellular localization with a weak expression in the cell membrane. {ECO:0000250}.		cation transport [GO:0006812]; chloride transport [GO:0006821]; transmembrane transport [GO:0055085]	calcium activated cation channel activity [GO:0005227]; intracellular calcium activated chloride channel activity [GO:0005229]	integral component of membrane [GO:0016021]; intracellular membrane-bounded organelle [GO:0043231]; plasma membrane [GO:0005886]	GO:0005227; GO:0005229; GO:0005886; GO:0006812; GO:0006821; GO:0016021; GO:0043231; GO:0055085	R-MMU-2672351;	mmu:102566;	16.5586	16.5712	16.5729	16.4755	16.5569	17.1076	16.9196	17.0623	17.02	16.9596
Vps4a_Q8VEJ9	-0.782268	-1.12651	-1.06972	-0.887141	-0.702794	1.26225	1.11554	1.14011	0.572308	0.478214	Vps4a	Vacuolar protein sorting-associated protein 4A	Q8VEJ9	1.03372	3.53552e-06	0.00218716	-0.521906	sp|Q8VEJ9|VPS4A_MOUSE Vacuolar protein sorting-associated protein 4A OS=Mus musculus OX=10090 GN=Vps4a PE=1 SV=1	FUNCTION: Involved in late steps of the endosomal multivesicular bodies (MVB) pathway. Recognizes membrane-associated ESCRT-III assemblies and catalyzes their disassembly, possibly in combination with membrane fission. Redistributes the ESCRT-III components to the cytoplasm for further rounds of MVB sorting. MVBs contain intraluminal vesicles (ILVs) that are generated by invagination and scission…	SUBCELLULAR LOCATION: Prevacuolar compartment membrane {ECO:0000269|PubMed:12594041}; Peripheral membrane protein {ECO:0000269|PubMed:12594041}. Late endosome membrane {ECO:0000250}; Peripheral membrane protein {ECO:0000250}. Midbody {ECO:0000250}. Note=Membrane-associated in the prevacuolar endosomal compartment. Localizes to the midbody of dividing cells. Localizes to the midbody of dividing ce…		abscission [GO:0009838]; cell division [GO:0051301]; endosomal transport [GO:0016197]; endosomal vesicle fusion [GO:0034058]; intracellular cholesterol transport [GO:0032367]; late endosomal microautophagy [GO:0061738]; midbody abscission [GO:0061952]; mitotic cytokinesis checkpoint [GO:0044878]; mitotic metaphase plate congression [GO:0007080]; multivesicular body assembly [GO:0036258]; negative…	ATPase activity [GO:0016887]; ATP binding [GO:0005524]; protein-containing complex binding [GO:0044877]; protein C-terminus binding [GO:0008022]; protein domain specific binding [GO:0019904]; Rho GTPase binding [GO:0017048]	centrosome [GO:0005813]; cytoplasm [GO:0005737]; cytosol [GO:0005829]; early endosome [GO:0005769]; endosome [GO:0005768]; endosome membrane [GO:0010008]; Flemming body [GO:0090543]; late endosome [GO:0005770]; late endosome membrane [GO:0031902]; lysosome [GO:0005764]; midbody [GO:0030496]; nucleus [GO:0005634]; perinuclear region of cytoplasm [GO:0048471]; plasma membrane [GO:0005886]; spindle …	GO:0000922; GO:0005524; GO:0005634; GO:0005737; GO:0005764; GO:0005768; GO:0005769; GO:0005770; GO:0005774; GO:0005813; GO:0005829; GO:0005886; GO:0006622; GO:0006900; GO:0006997; GO:0007033; GO:0007080; GO:0008022; GO:0009838; GO:0010008; GO:0016192; GO:0016197; GO:0016887; GO:0017048; GO:0019076; GO:0019904; GO:0030496; GO:0031902; GO:0032367; GO:0032466; GO:0032880; GO:0034058; GO:0036258; GO:…	R-MMU-917729;R-MMU-9668328;	mmu:116733;	15.5168	15.4185	15.4347	15.4869	15.5395	16.1008	16.0589	16.0659	15.9037	15.8768
Gpx4_O70325	-0.922799	-0.4848	-0.907732	-1.39958	-0.8809	1.18457	0.994508	0.857081	0.703963	0.855696	Gpx4	Phospholipid hydroperoxide glutathione peroxidase, mitochondrial	O70325	1.02652	4.48594e-06	0.00229793	-0.463665	sp|O70325|GPX4_MOUSE Phospholipid hydroperoxide glutathione peroxidase OS=Mus musculus OX=10090 GN=Gpx4 PE=1 SV=4	FUNCTION: Essential antioxidant peroxidase that directly reduces phospholipid hydroperoxide even if they are incorporated in membranes and lipoproteins (PubMed:29290465). Can also reduce fatty acid hydroperoxide, cholesterol hydroperoxide and thymine hydroperoxide (By similarity). Plays a key role in protecting cells from oxidative damage by preventing membrane lipid peroxidation (PubMed:12566075…	SUBCELLULAR LOCATION: [Isoform Mitochondrial]: Mitochondrion {ECO:0000269|PubMed:12566075, ECO:0000269|PubMed:22207760}.; SUBCELLULAR LOCATION: [Isoform Cytoplasmic]: Cytoplasm {ECO:0000269|PubMed:12566075}.; SUBCELLULAR LOCATION: [Isoform Nuclear]: Nucleus {ECO:0000269|PubMed:11344099}.		aging [GO:0007568]; arachidonic acid metabolic process [GO:0019369]; chromatin organization [GO:0006325]; glutathione metabolic process [GO:0006749]; lipoxygenase pathway [GO:0019372]; multicellular organism development [GO:0007275]; negative regulation of ferroptosis [GO:0110076]; protein polymerization [GO:0051258]; regulation of inflammatory response [GO:0050727]; response to estradiol [GO:003…	glutathione peroxidase activity [GO:0004602]; identical protein binding [GO:0042802]; peroxidase activity [GO:0004601]; phospholipid-hydroperoxide glutathione peroxidase activity [GO:0047066]; selenium binding [GO:0008430]	cytosol [GO:0005829]; mitochondrial inner membrane [GO:0005743]; mitochondrion [GO:0005739]; nuclear envelope [GO:0005635]; nucleoplasm [GO:0005654]; nucleus [GO:0005634]; protein-containing complex [GO:0032991]	GO:0004601; GO:0004602; GO:0005634; GO:0005635; GO:0005654; GO:0005739; GO:0005743; GO:0005829; GO:0006325; GO:0006749; GO:0006979; GO:0007275; GO:0007283; GO:0007568; GO:0008430; GO:0019369; GO:0019372; GO:0032355; GO:0032991; GO:0042802; GO:0047066; GO:0050727; GO:0051258; GO:0110076	R-MMU-2142712;R-MMU-2142770;R-MMU-9018676;R-MMU-9018896;R-MMU-9020265;R-MMU-9023661;	mmu:625249;	17.4847	17.5952	17.4885	17.3645	17.4953	18.0162	17.9683	17.9336	17.895	17.9333
Slc18b1_D3Z5L6	-1.30057	-0.453324	-0.943025	-1.07366	-0.647266	1.47219	0.605673	1.19827	0.470228	0.671478	Slc18b1	MFS-type transporter SLC18B1	D3Z5L6	1.1034	4.86862e-06	0.00229793	-1.26945	sp|D3Z5L6|S18B1_MOUSE MFS-type transporter SLC18B1 OS=Mus musculus OX=10090 GN=Slc18b1 PE=2 SV=2		SUBCELLULAR LOCATION: Membrane {ECO:0000305}; Multi-pass membrane protein {ECO:0000305}.			transmembrane transporter activity [GO:0022857]	integral component of membrane [GO:0016021]	GO:0016021; GO:0022857			11.978	12.5867	12.2349	12.141	12.4473	13.9699	13.3474	13.7731	13.2501	13.3947
C9_P06683	-0.910597	-0.9878	-0.563247	-0.894084	-1.17276	0.822871	1.45164	1.12779	0.642494	0.483689	C9	Complement component C9	P06683	1.03106	5.51303e-06	0.00229793	-0.536624	sp|P06683|CO9_MOUSE Complement component C9 OS=Mus musculus OX=10090 GN=C9 PE=1 SV=2	FUNCTION: Constituent of the membrane attack complex (MAC) that plays a key role in the innate and adaptive immune response by forming pores in the plasma membrane of target cells. C9 is the pore-forming subunit of the MAC. {ECO:0000250|UniProtKB:P02748}.	SUBCELLULAR LOCATION: Secreted {ECO:0000250|UniProtKB:P02748}. Target cell membrane {ECO:0000250|UniProtKB:P02748}; Multi-pass membrane protein {ECO:0000250|UniProtKB:P02748}. Note=Secreted as soluble monomer. Oligomerizes at target membranes, forming a pre-pore. A conformation change then leads to the formation of a 100 Angstrom diameter pore. {ECO:0000250|UniProtKB:P02748}.		blood coagulation [GO:0007596]; cell killing [GO:0001906]; complement activation, alternative pathway [GO:0006957]; complement activation, classical pathway [GO:0006958]; cytolysis [GO:0019835]; protein homooligomerization [GO:0051260]		extracellular space [GO:0005615]; membrane attack complex [GO:0005579]; other organism cell membrane [GO:0044218]; plasma membrane [GO:0005886]	GO:0001906; GO:0005579; GO:0005615; GO:0005886; GO:0006957; GO:0006958; GO:0007596; GO:0019835; GO:0044218; GO:0051260	R-MMU-166665;R-MMU-977606;	mmu:12279;	17.2782	17.2553	17.3811	17.2831	17.2005	17.7917	17.978	17.8821	17.7383	17.6913
Vps33a_Q9D2N9	-0.641577	-1.07791	-1.15289	-0.939983	-0.791698	1.14992	0.719871	0.588164	1.29401	0.852083	Vps33a	Vacuolar protein sorting-associated protein 33A	Q9D2N9	1.02877	5.67233e-06	0.00229793	-0.437725	sp|Q9D2N9|VP33A_MOUSE Vacuolar protein sorting-associated protein 33A OS=Mus musculus OX=10090 GN=Vps33a PE=1 SV=2	FUNCTION: Plays a role in vesicle-mediated protein trafficking to lysosomal compartments including the endocytic membrane transport and autophagic pathways. Believed to act as a core component of the putative HOPS and CORVET endosomal tethering complexes which are proposed to be involved in the Rab5-to-Rab7 endosome conversion probably implicating MON1A/B, and via binding SNAREs and SNARE complex…	SUBCELLULAR LOCATION: Cytoplasmic vesicle {ECO:0000250|UniProtKB:Q63615}. Late endosome membrane {ECO:0000305}; Peripheral membrane protein {ECO:0000305}; Cytoplasmic side {ECO:0000305}. Lysosome membrane {ECO:0000269|PubMed:27628032}; Peripheral membrane protein {ECO:0000305}; Cytoplasmic side {ECO:0000305}. Early endosome {ECO:0000305}. Cytoplasmic vesicle, autophagosome {ECO:0000269|PubMed:276…	DISEASE: Note=Defects in Vps33a are the cause of the buff mutant which exhibits hypopigmentation in the coat and eyes, due to reduced size and number of melanosomes in their cells. In addition, mice are prone to prolonged bleeding, due to a platelet-storage pool defect.	autophagosome maturation [GO:0097352]; endosome to lysosome transport [GO:0008333]; intracellular protein transport [GO:0006886]; lysosome localization [GO:0032418]; melanosome localization [GO:0032400]; pigmentation [GO:0043473]; platelet formation [GO:0030220]; regulation of developmental pigmentation [GO:0048070]; regulation of lysosomal lumen pH [GO:0035751]; vesicle docking involved in exocy…	protein-containing complex binding [GO:0044877]	autophagosome [GO:0005776]; clathrin-coated vesicle [GO:0030136]; CORVET complex [GO:0033263]; cytoplasmic vesicle [GO:0031410]; early endosome [GO:0005769]; HOPS complex [GO:0030897]; late endosome [GO:0005770]; late endosome membrane [GO:0031902]; lysosomal membrane [GO:0005765]; lysosome [GO:0005764]; perinuclear region of cytoplasm [GO:0048471]	GO:0005764; GO:0005765; GO:0005769; GO:0005770; GO:0005776; GO:0006886; GO:0006904; GO:0008333; GO:0016192; GO:0030136; GO:0030220; GO:0030897; GO:0031410; GO:0031902; GO:0032400; GO:0032418; GO:0033263; GO:0035751; GO:0043473; GO:0044877; GO:0048070; GO:0048471; GO:0097352		mmu:77573;	15.279	15.1752	15.1574	15.208	15.2433	15.7048	15.6026	15.5712	15.739	15.634
Acbd5_Q5XG73	-0.696739	-0.635462	-0.735885	-1.18596	-1.2702	1.06958	1.15638	1.17291	0.390729	0.734651	Acbd5	Acyl-CoA-binding domain-containing protein 5	Q5XG73	1.0366	6.03619e-06	0.00229793	-0.532337	sp|Q5XG73|ACBD5_MOUSE Acyl-CoA-binding domain-containing protein 5 OS=Mus musculus OX=10090 GN=Acbd5 PE=1 SV=1	FUNCTION: Acyl-CoA binding protein which acts as the peroxisome receptor for pexophagy but is dispensable for aggrephagy and nonselective autophagy. Binds medium- and long-chain acyl-CoA esters (By similarity). {ECO:0000250}.	SUBCELLULAR LOCATION: Peroxisome membrane {ECO:0000269|PubMed:17768142}; Single-pass membrane protein {ECO:0000269|PubMed:17768142}.		autophagy of peroxisome [GO:0030242]	fatty-acyl-CoA binding [GO:0000062]; lipid binding [GO:0008289]	integral component of membrane [GO:0016021]; nucleoplasm [GO:0005654]; peroxisomal membrane [GO:0005778]; peroxisome [GO:0005777]	GO:0000062; GO:0005654; GO:0005777; GO:0005778; GO:0008289; GO:0016021; GO:0030242	R-MMU-390918;R-MMU-9603798;	mmu:74159;	14.606	14.624	14.5945	14.4621	14.4373	15.1256	15.1511	15.156	14.9259	15.0271
Pdcd4_Q61823	-0.376953	-1.11171	-1.01226	-1.35956	-0.604591	1.19581	0.678189	0.486589	1.19769	0.9068	Pdcd4	Programmed cell death protein 4	Q61823	1.04509	6.73524e-06	0.00238091	-0.655831	sp|Q61823|PDCD4_MOUSE Programmed cell death protein 4 OS=Mus musculus OX=10090 GN=Pdcd4 PE=1 SV=1	FUNCTION: Inhibits translation initiation and cap-dependent translation. May excert its function by hindering the interaction between EIF4A1 and EIF4G. Inhibits the helicase activity of EIF4A. Modulates the activation of JUN kinase. Down-regulates the expression of MAP4K1, thus inhibiting events important in driving invasion, namely, MAPK85 activation and consequent JUN-dependent transcription. M…	SUBCELLULAR LOCATION: Nucleus {ECO:0000269|PubMed:12894233}. Cytoplasm {ECO:0000269|PubMed:12894233}. Note=Shuttles between the nucleus and cytoplasm (PubMed:12894233). Predominantly nuclear under normal growth conditions, and when phosphorylated at Ser-457 (By similarity). {ECO:0000250|UniProtKB:Q53EL6, ECO:0000269|PubMed:12894233}.	DISEASE: Note=Decreases benign tumor development and malignant progression. {ECO:0000305|PubMed:16024603}.	apoptotic process [GO:0006915]; BMP signaling pathway [GO:0030509]; cell aging [GO:0007569]; cellular response to lipopolysaccharide [GO:0071222]; epithelial to mesenchymal transition involved in cardiac fibroblast development [GO:0060940]; negative regulation of apoptotic process [GO:0043066]; negative regulation of cytokine production involved in inflammatory response [GO:1900016]; negative reg…	RNA binding [GO:0003723]	cytoplasm [GO:0005737]; cytosol [GO:0005829]; nucleus [GO:0005634]	GO:0003723; GO:0005634; GO:0005737; GO:0005829; GO:0006915; GO:0007569; GO:0030509; GO:0034393; GO:0043066; GO:0043508; GO:0045892; GO:0050729; GO:0051246; GO:0060940; GO:0071222; GO:1900016; GO:1901224; GO:1904706; GO:1904761; GO:1905064; GO:1905461; GO:2000353		mmu:18569;	14.7348	14.465	14.5015	14.374	14.6512	15.3123	15.1222	15.0519	15.313	15.2062
Ppip5k1_A2ARP1	-0.763115	-1.04906	-1.25726	-0.564026	-0.963961	1.09658	0.843436	1.26934	0.711355	0.676717	Ppip5k1	Inositol hexakisphosphate and diphosphoinositol-pentakisphosphate kinase 1	A2ARP1	1.03412	8.91256e-06	0.00260732	-0.412356	sp|A2ARP1|VIP1_MOUSE Inositol hexakisphosphate and diphosphoinositol-pentakisphosphate kinase 1 OS=Mus musculus OX=10090 GN=Ppip5k1 PE=1 SV=1	FUNCTION: Bifunctional inositol kinase that acts in concert with the IP6K kinases IP6K1, IP6K2 and IP6K3 to synthesize the diphosphate group-containing inositol pyrophosphates diphosphoinositol pentakisphosphate, PP-InsP5, and bis-diphosphoinositol tetrakisphosphate, (PP)2-InsP4. PP-InsP5 and (PP)2-InsP4, also respectively called InsP7 and InsP8, regulate a variety of cellular processes, includin…	SUBCELLULAR LOCATION: Cytoplasm, cytosol {ECO:0000250|UniProtKB:Q6PFW1}. Cell membrane {ECO:0000250|UniProtKB:Q6PFW1}. Note=Relocalizes to the plasma membrane upon activation of the PtdIns 3-kinase pathway. {ECO:0000250|UniProtKB:Q6PFW1}.		inositol metabolic process [GO:0006020]; inositol phosphate biosynthetic process [GO:0032958]	5-diphosphoinositol pentakisphosphate 3-kinase activity [GO:0102092]; ATP binding [GO:0005524]; diphosphoinositol-pentakisphosphate kinase activity [GO:0033857]; inositol-1,3,4,5,6-pentakisphosphate kinase activity [GO:0000827]; inositol heptakisphosphate kinase activity [GO:0000829]; inositol hexakisphosphate 1-kinase activity [GO:0052723]; inositol hexakisphosphate 3-kinase activity [GO:0052724…	cytosol [GO:0005829]; plasma membrane [GO:0005886]	GO:0000827; GO:0000828; GO:0000829; GO:0000832; GO:0005524; GO:0005829; GO:0005886; GO:0006020; GO:0032958; GO:0033857; GO:0052723; GO:0052724; GO:0102092	R-MMU-1855167;	mmu:327655;	12.1198	12.0557	12.009	12.1645	12.0748	12.5368	12.4801	12.5756	12.4504	12.4427
Serpinc1_P32261	-0.408173	-1.18133	-1.18914	-0.997425	-0.646824	1.32147	0.643805	1.19285	0.969339	0.295438	Serpinc1	Antithrombin-III	P32261	1.04151	9.57618e-06	0.00260732	-0.717209	sp|P32261|ANT3_MOUSE Antithrombin-III OS=Mus musculus OX=10090 GN=Serpinc1 PE=1 SV=1	FUNCTION: Most important serine protease inhibitor in plasma that regulates the blood coagulation cascade. AT-III inhibits thrombin, matriptase-3/TMPRSS7, as well as factors IXa, Xa and XIa. Its inhibitory activity is greatly enhanced in the presence of heparin (By similarity). {ECO:0000250}.	SUBCELLULAR LOCATION: Secreted, extracellular space {ECO:0000250}.		acute inflammatory response to antigenic stimulus [GO:0002438]; blood coagulation [GO:0007596]; lactation [GO:0007595]; negative regulation of endopeptidase activity [GO:0010951]; regulation of blood coagulation, intrinsic pathway [GO:2000266]; response to nutrient [GO:0007584]	heparin binding [GO:0008201]; identical protein binding [GO:0042802]; protease binding [GO:0002020]; serine-type endopeptidase inhibitor activity [GO:0004867]	collagen-containing extracellular matrix [GO:0062023]; extracellular space [GO:0005615]	GO:0002020; GO:0002438; GO:0004867; GO:0005615; GO:0007584; GO:0007595; GO:0007596; GO:0008201; GO:0010951; GO:0042802; GO:0062023; GO:2000266	R-MMU-140837;R-MMU-140875;R-MMU-381426;R-MMU-8957275;	mmu:11905;	17.4712	17.1578	17.1546	17.2323	17.3744	18.1724	17.8977	18.1202	18.0296	17.7564
Hsdl2_Q2TPA8	-0.794184	-0.949998	-0.537775	-1.01009	-1.29546	1.22685	0.777026	1.14266	0.835169	0.605802	Hsdl2	Hydroxysteroid dehydrogenase-like protein 2	Q2TPA8	1.02375	1.02346e-05	0.00260732	-0.410756	sp|Q2TPA8|HSDL2_MOUSE Hydroxysteroid dehydrogenase-like protein 2 OS=Mus musculus OX=10090 GN=Hsdl2 PE=1 SV=1	FUNCTION: Has apparently no steroid dehydrogenase activity. {ECO:0000250}.	SUBCELLULAR LOCATION: Peroxisome {ECO:0000250}.			oxidoreductase activity [GO:0016491]	mitochondrion [GO:0005739]; peroxisome [GO:0005777]	GO:0005739; GO:0005777; GO:0016491		mmu:72479;	17.3208	17.286	17.3782	17.2725	17.2086	17.7732	17.6726	17.7544	17.6856	17.6342
Mpdz_Q8VBX6	-0.939314	-0.583962	-0.734306	-1.40711	-0.769435	1.10856	0.818372	1.13839	0.167629	1.20117	Mpdz	Multiple PDZ domain protein	Q8VBX6	1.04273	1.03366e-05	0.00260732	-0.649757	sp|Q8VBX6|MPDZ_MOUSE Multiple PDZ domain protein OS=Mus musculus OX=10090 GN=Mpdz PE=1 SV=2	FUNCTION: Member of the NMDAR signaling complex that may play a role in control of AMPAR potentiation and synaptic plasticity in excitatory synapses (By similarity). Promotes clustering of HT2RC at the cell surface (By similarity). {ECO:0000250|UniProtKB:O55164, ECO:0000250|UniProtKB:O75970}.	SUBCELLULAR LOCATION: Cell membrane; Peripheral membrane protein; Cytoplasmic side. Apical cell membrane; Peripheral membrane protein; Cytoplasmic side. Cell junction, synapse, postsynaptic density. Cell projection, dendrite. Cell junction, tight junction {ECO:0000250}. Cell junction, synapse. Cell junction, synapse, synaptosome {ECO:0000250}. Note=Colocalizes with HTR2C on the apical membrane of…		cell adhesion [GO:0007155]; myelination [GO:0042552]	protein C-terminus binding [GO:0008022]	apical plasma membrane [GO:0016324]; apicolateral plasma membrane [GO:0016327]; bicellular tight junction [GO:0005923]; cytoplasm [GO:0005737]; cytoplasmic vesicle [GO:0031410]; dendrite [GO:0030425]; postsynaptic density [GO:0014069]; Schmidt-Lanterman incisure [GO:0043220]	GO:0005737; GO:0005923; GO:0007155; GO:0008022; GO:0014069; GO:0016324; GO:0016327; GO:0030425; GO:0031410; GO:0042552; GO:0043220		mmu:17475;	15.1873	15.3175	15.2624	15.0159	15.2495	15.9375	15.8312	15.9484	15.5928	15.9714
Ces1c_P23953	-0.349361	-1.4455	-0.815559	-0.67538	-1.15708	0.873998	0.629547	1.38758	0.915177	0.636583	Ces1c	Carboxylesterase 1C	P23953	1.03235	1.16069e-05	0.00260732	-0.596262	sp|P23953|EST1C_MOUSE Carboxylesterase 1C OS=Mus musculus OX=10090 GN=Ces1c PE=1 SV=4	FUNCTION: Involved in the detoxification of xenobiotics and in the activation of ester and amide prodrugs. Involved in the extracellular metabolism of lung surfactant.	SUBCELLULAR LOCATION: Endoplasmic reticulum lumen. Note=Microsomal membrane, lumen of endoplasmic reticulum.		lipid catabolic process [GO:0016042]; response to bacterium [GO:0009617]	carboxylic ester hydrolase activity [GO:0052689]; hydrolase activity, acting on ester bonds [GO:0016788]; methyl indole-3-acetate esterase activity [GO:0080030]; sterol esterase activity [GO:0004771]; triglyceride lipase activity [GO:0004806]	endoplasmic reticulum lumen [GO:0005788]; extracellular space [GO:0005615]	GO:0004771; GO:0004806; GO:0005615; GO:0005788; GO:0009617; GO:0016042; GO:0016788; GO:0052689; GO:0080030		mmu:13884;	18.6145	18.2468	18.4581	18.5052	18.3435	19.025	18.943	19.1973	19.0388	18.9453
Alcam_Q61490	-1.17353	-0.204643	-0.856346	-1.36748	-0.848726	1.19441	1.04985	0.939829	0.486664	0.779977	Alcam	CD166 antigen	Q61490	1.03841	1.17761e-05	0.00260732	-0.574226	sp|Q61490|CD166_MOUSE CD166 antigen OS=Mus musculus OX=10090 GN=Alcam PE=1 SV=3	FUNCTION: Cell adhesion molecule that mediates both heterotypic cell-cell contacts via its interaction with CD6, as well as homotypic cell-cell contacts. Promotes T-cell activation and proliferation via its interactions with CD6 (By similarity). Contributes to the formation and maturation of the immunological synapse via its interactions with CD6 (By similarity). Mediates homotypic interactions w…	SUBCELLULAR LOCATION: Cell membrane {ECO:0000269|PubMed:15345243, ECO:0000269|PubMed:16914752, ECO:0000269|PubMed:23169771, ECO:0000269|PubMed:9209500}; Single-pass type I membrane protein {ECO:0000305}. Cell projection, axon {ECO:0000269|PubMed:15345243}. Cell projection, dendrite {ECO:0000269|PubMed:15345243}. Note=Detected at the immunological synapse, i.e, at the contact zone between antigen-…		adaptive immune response [GO:0002250]; axon extension involved in axon guidance [GO:0048846]; axon guidance [GO:0007411]; cell adhesion [GO:0007155]; heterophilic cell-cell adhesion via plasma membrane cell adhesion molecules [GO:0007157]; motor neuron axon guidance [GO:0008045]; neuron projection extension [GO:1990138]; retinal ganglion cell axon guidance [GO:0031290]	identical protein binding [GO:0042802]	axon [GO:0030424]; dendrite [GO:0030425]; external side of plasma membrane [GO:0009897]; immunological synapse [GO:0001772]; integral component of plasma membrane [GO:0005887]; intrinsic component of plasma membrane [GO:0031226]; neuronal cell body [GO:0043025]; T cell receptor complex [GO:0042101]	GO:0001772; GO:0002250; GO:0005887; GO:0007155; GO:0007157; GO:0007411; GO:0008045; GO:0009897; GO:0030424; GO:0030425; GO:0031226; GO:0031290; GO:0042101; GO:0042802; GO:0043025; GO:0048846; GO:1990138		mmu:11658;	14.8574	15.1699	14.9597	14.7948	14.9622	15.6212	15.5745	15.5391	15.3929	15.4875
Rbp4_Q00724	-0.665776	-1.46385	-0.864676	-0.815231	-0.579903	1.14253	0.466997	1.41847	0.362099	0.999351	Rbp4	Retinol-binding protein 4	Q00724	1.05681	1.17772e-05	0.00260732	-0.812654	sp|Q00724|RET4_MOUSE Retinol-binding protein 4 OS=Mus musculus OX=10090 GN=Rbp4 PE=1 SV=2	FUNCTION: Retinol-binding protein that mediates retinol transport in blood plasma. Delivers retinol from the liver stores to the peripheral tissues. Transfers the bound all-trans retinol to STRA6, that then facilitates retinol transport across the cell membrane. {ECO:0000250|UniProtKB:P02753}.	SUBCELLULAR LOCATION: Secreted {ECO:0000250|UniProtKB:P02753}.		cardiac muscle tissue development [GO:0048738]; detection of light stimulus involved in visual perception [GO:0050908]; embryonic organ morphogenesis [GO:0048562]; embryonic retina morphogenesis in camera-type eye [GO:0060059]; embryonic skeletal system development [GO:0048706]; eye development [GO:0001654]; female genitalia morphogenesis [GO:0048807]; gluconeogenesis [GO:0006094]; glucose homeos…	protein-containing complex binding [GO:0044877]; retinal binding [GO:0016918]; retinol binding [GO:0019841]; retinol transmembrane transporter activity [GO:0034632]	extracellular space [GO:0005615]; protein-containing complex [GO:0032991]	GO:0001654; GO:0005615; GO:0006094; GO:0007283; GO:0007507; GO:0008584; GO:0016918; GO:0019841; GO:0030277; GO:0030324; GO:0032024; GO:0032526; GO:0032868; GO:0032991; GO:0034632; GO:0034633; GO:0042572; GO:0042574; GO:0042593; GO:0044877; GO:0048562; GO:0048706; GO:0048738; GO:0048807; GO:0050908; GO:0051024; GO:0060041; GO:0060044; GO:0060059; GO:0060065; GO:0060068; GO:0060157; GO:0060347; GO:…	R-MMU-2453902;R-MMU-975634;	mmu:19662;	14.4025	14.0331	14.3105	14.3334	14.4423	15.2395	14.9268	15.3672	14.8783	15.1732
Mtatp8_P03930	-0.887022	-0.7502	-0.97378	-0.923825	-0.99043	1.1347	0.643919	1.49268	0.351958	0.902005	Mtatp8	ATP synthase protein 8	P03930	1.02859	1.19082e-05	0.00260732	-0.455504	sp|P03930|ATP8_MOUSE ATP synthase protein 8 OS=Mus musculus OX=10090 GN=Mtatp8 PE=1 SV=1	FUNCTION: Mitochondrial membrane ATP synthase (F(1)F(0) ATP synthase or Complex V) produces ATP from ADP in the presence of a proton gradient across the membrane which is generated by electron transport complexes of the respiratory chain. F-type ATPases consist of two structural domains, F(1) - containing the extramembraneous catalytic core and F(0) - containing the membrane proton channel, linke…	SUBCELLULAR LOCATION: Mitochondrion membrane; Single-pass membrane protein.		ATP synthesis coupled proton transport [GO:0015986]	proton transmembrane transporter activity [GO:0015078]	integral component of membrane [GO:0016021]; mitochondrial proton-transporting ATP synthase complex [GO:0005753]; mitochondrial proton-transporting ATP synthase complex, coupling factor F(o) [GO:0000276]; mitochondrion [GO:0005739]	GO:0000276; GO:0005739; GO:0005753; GO:0015078; GO:0015986; GO:0016021	R-MMU-163210;R-MMU-8949613;	mmu:17706;	15.9368	15.9712	15.9149	15.9275	15.9107	16.4455	16.322	16.5356	16.2486	16.387
St13_Q99L47	-0.408078	-0.891445	-1.04365	-1.29587	-0.858646	1.36287	1.03782	0.995607	0.530752	0.570639	St13	Hsc70-interacting protein	Q99L47	1.02625	1.22118e-05	0.00260732	-0.486314	sp|Q99L47|F10A1_MOUSE Hsc70-interacting protein OS=Mus musculus OX=10090 GN=St13 PE=1 SV=1	FUNCTION: One HIP oligomer binds the ATPase domains of at least two HSC70 molecules dependent on activation of the HSC70 ATPase by HSP40. Stabilizes the ADP state of HSC70 that has a high affinity for substrate protein. Through its own chaperone activity, it may contribute to the interaction of HSC70 with various target proteins (By similarity). {ECO:0000250}.	SUBCELLULAR LOCATION: Cytoplasm {ECO:0000250}.		chaperone cofactor-dependent protein refolding [GO:0051085]; chaperone-mediated protein folding [GO:0061077]; negative regulation of protein refolding [GO:0061084]; protein-containing complex assembly [GO:0065003]; response to bacterium [GO:0009617]	chaperone binding [GO:0051087]; dATP binding [GO:0032564]; heat shock protein binding [GO:0031072]; Hsp70 protein binding [GO:0030544]; identical protein binding [GO:0042802]; protein-containing complex binding [GO:0044877]; protein dimerization activity [GO:0046983]; protein domain specific binding [GO:0019904]; unfolded protein binding [GO:0051082]	cytosol [GO:0005829]; protein-containing complex [GO:0032991]	GO:0005829; GO:0009617; GO:0019904; GO:0030544; GO:0031072; GO:0032564; GO:0032991; GO:0042802; GO:0044877; GO:0046983; GO:0051082; GO:0051085; GO:0051087; GO:0061077; GO:0061084; GO:0065003	R-MMU-3371453;	mmu:70356;	18.6583	18.5277	18.4865	18.4183	18.5365	19.137	19.0492	19.0378	18.9121	18.9229
Sucla2_Q9Z2I9	-1.11811	-0.848611	-0.392723	-1.04654	-1.15368	0.926869	1.29284	1.0257	0.618286	0.695968	Sucla2	Succinyl-CoA ligase [ADP-forming] subunit beta, mitochondrial	Q9Z2I9	1.02232	1.29206e-05	0.00260732	-0.416237	sp|Q9Z2I9|SUCB1_MOUSE Succinate--CoA ligase [ADP-forming] subunit beta, mitochondrial OS=Mus musculus OX=10090 GN=Sucla2 PE=1 SV=2	FUNCTION: ATP-specific succinyl-CoA synthetase functions in the citric acid cycle (TCA), coupling the hydrolysis of succinyl-CoA to the synthesis of ATP and thus represents the only step of substrate-level phosphorylation in the TCA. The beta subunit provides nucleotide specificity of the enzyme and binds the substrate succinate, while the binding sites for coenzyme A and phosphate are found in t…	SUBCELLULAR LOCATION: Mitochondrion {ECO:0000255|HAMAP-Rule:MF_03220}.		succinate metabolic process [GO:0006105]; succinyl-CoA metabolic process [GO:0006104]; tricarboxylic acid cycle [GO:0006099]	ATP binding [GO:0005524]; magnesium ion binding [GO:0000287]; succinate-CoA ligase (ADP-forming) activity [GO:0004775]; succinate-CoA ligase (GDP-forming) activity [GO:0004776]; succinate-CoA ligase activity [GO:0004774]	mitochondrion [GO:0005739]; myelin sheath [GO:0043209]; succinate-CoA ligase complex [GO:0042709]	GO:0000287; GO:0004774; GO:0004775; GO:0004776; GO:0005524; GO:0005739; GO:0006099; GO:0006104; GO:0006105; GO:0042709; GO:0043209	R-MMU-71403;	mmu:20916;	18.6007	18.6622	18.7662	18.617	18.5926	19.0674	19.1509	19.09	18.997	19.0147
Epb41l2_O70318	-1.14104	-0.685421	-0.880323	-1.13682	-0.614895	1.10137	0.902105	1.19115	0.113065	1.15081	Epb41l2	Band 4.1-like protein 2	O70318	1.02726	1.40723e-05	0.00260732	-0.527904	sp|O70318|E41L2_MOUSE Band 4.1-like protein 2 OS=Mus musculus OX=10090 GN=Epb41l2 PE=1 SV=2	FUNCTION: Required for dynein-dynactin complex and NUMA1 recruitment at the mitotic cell cortex during anaphase. {ECO:0000250|UniProtKB:O43491}.	SUBCELLULAR LOCATION: Cytoplasm, cytoskeleton {ECO:0000250}. Cytoplasm, cell cortex {ECO:0000250|UniProtKB:O43491}. Cell membrane {ECO:0000250|UniProtKB:O43491}.		actin cytoskeleton organization [GO:0030036]; actomyosin structure organization [GO:0031032]; cell cycle [GO:0007049]; cell division [GO:0051301]; cortical actin cytoskeleton organization [GO:0030866]; positive regulation of protein localization to cell cortex [GO:1904778]; regulation of cell shape [GO:0008360]	actin binding [GO:0003779]; PH domain binding [GO:0042731]; spectrin binding [GO:0030507]; structural molecule activity [GO:0005198]	actin cytoskeleton [GO:0015629]; cell cortex region [GO:0099738]; cell junction [GO:0030054]; COP9 signalosome [GO:0008180]; cytoskeleton [GO:0005856]; nucleoplasm [GO:0005654]; plasma membrane [GO:0005886]	GO:0003779; GO:0005198; GO:0005654; GO:0005856; GO:0005886; GO:0007049; GO:0008180; GO:0008360; GO:0015629; GO:0030036; GO:0030054; GO:0030507; GO:0030866; GO:0031032; GO:0042731; GO:0051301; GO:0099738; GO:1904778	R-MMU-6794361;	mmu:13822;	19.2908	19.4257	19.368	19.2921	19.4466	19.9546	19.8956	19.9812	19.6621	19.9692
Pex16_Q91XC9	-1.17315	-0.734102	-1.14944	-0.724987	-0.603253	0.558437	0.71626	1.67603	1.04241	0.391785	Pex16	Peroxisomal membrane protein PEX16	Q91XC9	1.06114	1.42839e-05	0.00260732	-0.745642	sp|Q91XC9|PEX16_MOUSE Peroxisomal membrane protein PEX16 OS=Mus musculus OX=10090 GN=Pex16 PE=1 SV=2	FUNCTION: Required for peroxisome membrane biogenesis. May play a role in early stages of peroxisome assembly. Can recruit other peroxisomal proteins, such as PEX3 and PMP34, to de novo peroxisomes derived from the endoplasmic reticulum (ER). May function as receptor for PEX3 (By similarity). {ECO:0000250|UniProtKB:Q9Y5Y5}.	SUBCELLULAR LOCATION: Peroxisome membrane {ECO:0000250|UniProtKB:Q9Y5Y5}; Multi-pass membrane protein {ECO:0000250|UniProtKB:Q9Y5Y5}.		ER-dependent peroxisome localization [GO:0106101]; ER-dependent peroxisome organization [GO:0032581]; peroxisome membrane biogenesis [GO:0016557]; peroxisome organization [GO:0007031]; protein import into peroxisome matrix [GO:0016558]; protein import into peroxisome membrane [GO:0045046]; protein targeting to peroxisome [GO:0006625]; protein to membrane docking [GO:0022615]	protein C-terminus binding [GO:0008022]	endoplasmic reticulum [GO:0005783]; endoplasmic reticulum membrane [GO:0005789]; integral component of peroxisomal membrane [GO:0005779]; peroxisomal membrane [GO:0005778]; peroxisome [GO:0005777]	GO:0005777; GO:0005778; GO:0005779; GO:0005783; GO:0005789; GO:0006625; GO:0007031; GO:0008022; GO:0016557; GO:0016558; GO:0022615; GO:0032581; GO:0045046; GO:0106101	R-MMU-9603798;	mmu:18633;	12.0692	12.2559	12.0793	12.2597	12.3115	12.8054	12.8724	13.2805	13.0111	12.7345
Azgp1_Q64726	-0.565091	-1.21363	-0.56082	-0.866175	-1.33164	0.744574	1.15596	0.986826	1.09336	0.556626	Azgp1	Zinc-alpha-2-glycoprotein	Q64726	1.0265	1.47946e-05	0.00260732	-0.42452	sp|Q64726|ZA2G_MOUSE Zinc-alpha-2-glycoprotein OS=Mus musculus OX=10090 GN=Azgp1 PE=1 SV=2	FUNCTION: Stimulates lipid degradation in adipocytes and causes the extensive fat losses associated with some advanced cancers. {ECO:0000250}.	SUBCELLULAR LOCATION: Secreted.		antigen processing and presentation of endogenous peptide antigen via MHC class Ib [GO:0002476]; cell adhesion [GO:0007155]; detection of chemical stimulus involved in sensory perception of bitter taste [GO:0001580]; regulation of multicellular organism growth [GO:0040014]		external side of plasma membrane [GO:0009897]; extracellular space [GO:0005615]	GO:0001580; GO:0002476; GO:0005615; GO:0007155; GO:0009897; GO:0040014	R-MMU-5223345;	mmu:12007;	16.097	15.9453	16.098	16.0266	15.9177	16.4033	16.4995	16.46	16.4849	16.3594
Dync1li2_Q6PDL0	-0.773395	-0.899037	-1.14912	-1.16196	-0.5162	1.24947	1.03424	1.21485	0.344544	0.656602	Dync1li2	Cytoplasmic dynein 1 light intermediate chain 2	Q6PDL0	1.02778	1.52094e-05	0.00260732	-0.459565	sp|Q6PDL0|DC1L2_MOUSE Cytoplasmic dynein 1 light intermediate chain 2 OS=Mus musculus OX=10090 GN=Dync1li2 PE=1 SV=2	FUNCTION: Acts as one of several non-catalytic accessory components of the cytoplasmic dynein 1 complex that are thought to be involved in linking dynein to cargos and to adapter proteins that regulate dynein function. Cytoplasmic dynein 1 acts as a motor for the intracellular retrograde motility of vesicles and organelles along microtubules. May play a role in binding dynein to membranous organe…	SUBCELLULAR LOCATION: Cytoplasm, cytoskeleton {ECO:0000250}.		cellular response to nerve growth factor stimulus [GO:1990090]; centrosome localization [GO:0051642]; microtubule-based movement [GO:0007018]; microtubule cytoskeleton organization [GO:0000226]	ATP binding [GO:0005524]; dynein heavy chain binding [GO:0045504]; identical protein binding [GO:0042802]; motor activity [GO:0003774]	centrosome [GO:0005813]; cytoplasmic dynein complex [GO:0005868]; kinetochore [GO:0000776]; late endosome [GO:0005770]; lysosome [GO:0005764]; microtubule [GO:0005874]	GO:0000226; GO:0000776; GO:0003774; GO:0005524; GO:0005764; GO:0005770; GO:0005813; GO:0005868; GO:0005874; GO:0007018; GO:0042802; GO:0045504; GO:0051642; GO:1990090	R-MMU-141444;R-MMU-2132295;R-MMU-2467813;R-MMU-2500257;R-MMU-3371497;R-MMU-5663220;R-MMU-6807878;R-MMU-6811436;R-MMU-68877;R-MMU-9646399;R-MMU-9648025;	mmu:234663;	16.578	16.5459	16.482	16.4788	16.6437	17.0945	17.0395	17.0856	16.8634	16.9431
Serpina1b_P22599	-0.911912	-1.15688	-0.427477	-0.584256	-1.36897	0.975798	0.826802	1.28735	1.00736	0.352189	Serpina1b	Alpha-1-antitrypsin 1-2	P22599	1.02867	1.52783e-05	0.00260732	-0.531086	sp|P22599|A1AT2_MOUSE Alpha-1-antitrypsin 1-2 OS=Mus musculus OX=10090 GN=Serpina1b PE=1 SV=2	FUNCTION: Inhibitor of serine proteases. Its primary target is elastase, but it also has a moderate affinity for plasmin and thrombin. {ECO:0000269|PubMed:11961105, ECO:0000269|PubMed:8619829}.	SUBCELLULAR LOCATION: Secreted {ECO:0000269|PubMed:11961105, ECO:0000269|PubMed:8619829}.		acute-phase response [GO:0006953]; in utero embryonic development [GO:0001701]; negative regulation of endopeptidase activity [GO:0010951]; protein N-linked glycosylation [GO:0006487]; response to cytokine [GO:0034097]; response to peptide hormone [GO:0043434]	endopeptidase inhibitor activity [GO:0004866]; identical protein binding [GO:0042802]; protease binding [GO:0002020]; serine-type endopeptidase inhibitor activity [GO:0004867]	endoplasmic reticulum [GO:0005783]; extracellular region [GO:0005576]; extracellular space [GO:0005615]; Golgi apparatus [GO:0005794]; intracellular membrane-bounded organelle [GO:0043231]	GO:0001701; GO:0002020; GO:0004866; GO:0004867; GO:0005576; GO:0005615; GO:0005783; GO:0005794; GO:0006487; GO:0006953; GO:0010951; GO:0034097; GO:0042802; GO:0043231; GO:0043434		mmu:20701;	18.5202	18.4471	18.6648	18.618	18.3838	19.0835	19.039	19.1765	19.0929	18.8974
Mon2_Q80TL7	-0.876836	-0.788311	-0.643067	-0.749072	-1.44129	1.15804	1.15908	1.1547	0.593354	0.433395	Mon2	Protein MON2 homolog	Q80TL7	1.02932	1.61111e-05	0.00265779	-0.454875	sp|Q80TL7|MON2_MOUSE Protein MON2 homolog OS=Mus musculus OX=10090 GN=Mon2 PE=1 SV=2	FUNCTION: May be required for traffic between late Golgi and early endosomes. {ECO:0000250}.			Golgi to endosome transport [GO:0006895]; protein transport [GO:0015031]		cytosol [GO:0005829]	GO:0005829; GO:0006895; GO:0015031		mmu:67074;	15.5201	15.5425	15.5792	15.5524	15.3775	16.0345	16.0348	16.0337	15.8918	15.8514
Acadm_P45952	-1.03026	-0.865604	-0.964528	-0.802401	-0.894359	0.615637	1.41319	0.787327	1.26019	0.480816	Acadm	Medium-chain specific acyl-CoA dehydrogenase, mitochondrial	P45952	1.02105	1.74384e-05	0.0027046	-0.396597	sp|P45952|ACADM_MOUSE Medium-chain specific acyl-CoA dehydrogenase, mitochondrial OS=Mus musculus OX=10090 GN=Acadm PE=1 SV=1	FUNCTION: Medium-chain specific acyl-CoA dehydrogenase is one of the acyl-CoA dehydrogenases that catalyze the first step of mitochondrial fatty acid beta-oxidation, an aerobic process breaking down fatty acids into acetyl-CoA and allowing the production of energy from fats (PubMed:16121256). The first step of fatty acid beta-oxidation consists in the removal of one hydrogen from C-2 and C-3 of t…	SUBCELLULAR LOCATION: Mitochondrion matrix {ECO:0000250|UniProtKB:P08503}.		cardiac muscle cell differentiation [GO:0055007]; carnitine biosynthetic process [GO:0045329]; carnitine metabolic process [GO:0009437]; carnitine metabolic process, CoA-linked [GO:0019254]; fatty acid beta-oxidation [GO:0006635]; fatty acid beta-oxidation using acyl-CoA dehydrogenase [GO:0033539]; glycogen biosynthetic process [GO:0005978]; heart development [GO:0007507]; liver development [GO:0…	acyl-CoA dehydrogenase activity [GO:0003995]; fatty-acyl-CoA binding [GO:0000062]; flavin adenine dinucleotide binding [GO:0050660]; identical protein binding [GO:0042802]; isomerase activity [GO:0016853]; medium-chain-acyl-CoA dehydrogenase activity [GO:0070991]	axon [GO:0030424]; mitochondrial matrix [GO:0005759]; mitochondrial membrane [GO:0031966]; mitochondrion [GO:0005739]	GO:0000062; GO:0001889; GO:0003995; GO:0005739; GO:0005759; GO:0005978; GO:0006082; GO:0006111; GO:0006635; GO:0007507; GO:0009409; GO:0009437; GO:0009791; GO:0016853; GO:0019254; GO:0030424; GO:0031966; GO:0033539; GO:0042594; GO:0042802; GO:0045329; GO:0050660; GO:0051791; GO:0051793; GO:0055007; GO:0055114; GO:0070991	R-MMU-77288;R-MMU-77346;R-MMU-77348;	mmu:11364;	18.8115	18.8473	18.8258	18.861	18.841	19.1696	19.3431	19.2069	19.3098	19.1402
Slc25a23_Q6GQS1	-0.444488	-1.1224	-1.40258	-0.782399	-0.566111	0.423739	1.54092	1.18671	0.586512	0.580102	Slc25a23	Calcium-binding mitochondrial carrier protein SCaMC-3	Q6GQS1	1.12829	1.76002e-05	0.0027046	-1.39581	sp|Q6GQS1|SCMC3_MOUSE Calcium-binding mitochondrial carrier protein SCaMC-3 OS=Mus musculus OX=10090 GN=Slc25a23 PE=1 SV=1	FUNCTION: Calcium-dependent mitochondrial solute carrier. Mitochondrial solute carriers shuttle metabolites, nucleotides, and cofactors through the mitochondrial inner membrane. May act as a ATP-Mg/Pi exchanger that mediates the transport of Mg-ATP in exchange for phosphate, catalyzing the net uptake or efflux of adenine nucleotides into or from the mitochondria. Acts as a regulator of mitochondr…	SUBCELLULAR LOCATION: Mitochondrion inner membrane {ECO:0000250|UniProtKB:Q9BV35}; Multi-pass membrane protein {ECO:0000250|UniProtKB:Q9BV35}.		adenine nucleotide transport [GO:0051503]; calcium import into the mitochondrion [GO:0036444]; cellular response to calcium ion [GO:0071277]; mitochondrial calcium ion transmembrane transport [GO:0006851]; positive regulation of mitochondrial calcium ion concentration [GO:0051561]; regulation of cellular hyperosmotic salinity response [GO:1900069]; regulation of cellular respiration [GO:0043457];…	ATP transmembrane transporter activity [GO:0005347]; calcium ion binding [GO:0005509]	integral component of membrane [GO:0016021]; mitochondrial inner membrane [GO:0005743]; mitochondrion [GO:0005739]	GO:0002082; GO:0005347; GO:0005509; GO:0005739; GO:0005743; GO:0006851; GO:0016021; GO:0036444; GO:0043457; GO:0051282; GO:0051503; GO:0051561; GO:0071277; GO:0097274; GO:1900069		mmu:66972;	11.2191	10.6713	10.4449	10.946	11.1208	11.9208	12.8236	12.5374	12.0523	12.0471
Il1rap_Q61730	-0.898083	-1.23177	-1.29554	-0.664171	-0.312283	1.09633	0.667819	1.41859	0.442662	0.776451	Il1rap	Interleukin-1 receptor accessory protein	Q61730	1.0367	1.86843e-05	0.0027046	-0.596224	sp|Q61730|IL1AP_MOUSE Interleukin-1 receptor accessory protein OS=Mus musculus OX=10090 GN=Il1rap PE=1 SV=1	FUNCTION: Coreceptor for IL1RL2 in the IL-36 signaling system. Coreceptor with IL1R1 in the IL-1 signaling system. Associates with IL1R1 bound to IL1B to form the high affinity interleukin-1 receptor complex which mediates interleukin-1-dependent activation of NF-kappa-B and other pathways. Signaling involves the recruitment of adapter molecules such as TOLLIP, MYD88, and IRAK1 or IRAK2 via the r…	SUBCELLULAR LOCATION: [Isoform 1]: Cell membrane; Single-pass type I membrane protein.; SUBCELLULAR LOCATION: [Isoform 2]: Secreted.		cytokine-mediated signaling pathway [GO:0019221]; inflammatory response [GO:0006954]; innate immune response [GO:0045087]; interleukin-2 production [GO:0032623]; interleukin-33-mediated signaling pathway [GO:0038172]; interleukin-4 production [GO:0032633]; positive regulation of dendrite development [GO:1900006]; positive regulation of interleukin-13 production [GO:0032736]; positive regulation o…	interleukin-1 receptor activity [GO:0004908]; interleukin-1 receptor binding [GO:0005149]; interleukin-33 receptor activity [GO:0002114]; NAD(P)+ nucleosidase activity [GO:0050135]; NAD+ nucleotidase, cyclic ADP-ribose generating [GO:0061809]; protein tyrosine kinase binding [GO:1990782]	cytoplasm [GO:0005737]; extracellular region [GO:0005576]; glutamatergic synapse [GO:0098978]; integral component of membrane [GO:0016021]; plasma membrane [GO:0005886]; protein-containing complex [GO:0032991]	GO:0002114; GO:0004908; GO:0005149; GO:0005576; GO:0005737; GO:0005886; GO:0006954; GO:0016021; GO:0019221; GO:0032623; GO:0032633; GO:0032736; GO:0032754; GO:0032755; GO:0032991; GO:0038172; GO:0045087; GO:0050135; GO:0051092; GO:0051965; GO:0061809; GO:0098978; GO:0099151; GO:0099545; GO:0099560; GO:1900006; GO:1905606; GO:1990782	R-MMU-1257604;R-MMU-388844;R-MMU-6811558;R-MMU-9014826;R-MMU-9014843;R-MMU-9020702;	mmu:16180;	16.2387	16.1257	16.1042	16.3179	16.4371	16.9141	16.769	17.0232	16.6927	16.8058
Bcl2l13_P59017	-1.17159	-0.521535	-0.660835	-1.20366	-0.859869	1.27875	1.1619	1.14867	0.210479	0.617684	Bcl2l13	Bcl-2-like protein 13	P59017	1.03336	2.05741e-05	0.0027046	-0.540411	sp|P59017|B2L13_MOUSE Bcl-2-like protein 13 OS=Mus musculus OX=10090 GN=Bcl2l13 PE=1 SV=2	FUNCTION: May promote the activation of caspase-3 and apoptosis.	SUBCELLULAR LOCATION: Mitochondrion membrane {ECO:0000250}; Single-pass membrane protein {ECO:0000250}.		apoptotic process [GO:0006915]; regulation of apoptotic process [GO:0042981]		integral component of membrane [GO:0016021]; mitochondrial membrane [GO:0031966]; mitochondrion [GO:0005739]	GO:0005739; GO:0006915; GO:0016021; GO:0031966; GO:0042981		mmu:94044;	16.11	16.3088	16.2662	16.1002	16.2053	16.8594	16.8237	16.8196	16.5327	16.6572
Tex2_Q6ZPJ0	-0.784429	-0.705676	-0.940075	-1.13877	-0.87162	1.50155	0.724543	0.943166	0.151338	1.11997	Tex2	Testis-expressed sequence 2 protein	Q6ZPJ0	1.03503	2.13037e-05	0.0027046	-0.495451	sp|Q6ZPJ0|TEX2_MOUSE Testis-expressed protein 2 OS=Mus musculus OX=10090 GN=Tex2 PE=1 SV=2	FUNCTION: During endoplasmic reticulum (ER) stress or when cellular ceramide levels increase, may induce contacts between the ER and medial-Golgi complex to facilitate non-vesicular transport of ceramides from the ER to the Golgi complex where they are converted to complex sphingolipids, preventing toxic ceramide accumulation. {ECO:0000250|UniProtKB:Q8IWB9}.	SUBCELLULAR LOCATION: Endoplasmic reticulum membrane {ECO:0000250|UniProtKB:Q06833}; Multi-pass membrane protein {ECO:0000255}. Nucleus membrane {ECO:0000250|UniProtKB:Q06833}; Multi-pass membrane protein {ECO:0000255}. Note=Enriched at the nucleus-vacuole junction (By similarity). During endoplasmic reticulum (ER) stress, localizes to ER-Golgi contacts (By similarity). {ECO:0000250|UniProtKB:Q06…		lipid transport [GO:0006869]	lipid binding [GO:0008289]	endoplasmic reticulum [GO:0005783]; endoplasmic reticulum membrane [GO:0005789]; integral component of membrane [GO:0016021]; nuclear membrane [GO:0031965]	GO:0005783; GO:0005789; GO:0006869; GO:0008289; GO:0016021; GO:0031965		mmu:21763;	14.1733	14.1953	14.1299	14.0745	14.149	14.811	14.5942	14.6552	14.4343	14.7045
Bsg_P18572	-1.23926	-0.716067	-0.984338	-0.963488	-0.600799	1.27182	1.18678	0.970954	0.265718	0.808689	Bsg	Basigin	P18572	1.0241	2.16953e-05	0.0027046	-0.421346	sp|P18572|BASI_MOUSE Basigin OS=Mus musculus OX=10090 GN=Bsg PE=1 SV=2	FUNCTION: [Isoform 1]: Essential for normal retinal maturation and development (PubMed:10967074, PubMed:11273674, PubMed:11853760). Acts as a retinal cell surface receptor for NXNL1 and plays an important role in NXNL1-mediated survival of retinal cone photoreceptors (PubMed:25957687). In association with glucose transporter SLC16A1/GLUT1 and NXNL1, promotes retinal cone survival by enhancing aer…	SUBCELLULAR LOCATION: [Isoform 1]: Cell membrane {ECO:0000269|PubMed:11273674, ECO:0000269|PubMed:25957687}; Single-pass type I membrane protein {ECO:0000250|UniProtKB:P26453}. Photoreceptor inner segment {ECO:0000269|PubMed:11853760, ECO:0000269|PubMed:25957687}. Cell projection, cilium, photoreceptor outer segment {ECO:0000269|PubMed:25957687}.; SUBCELLULAR LOCATION: [Isoform 2]: Cell membrane …		angiogenesis [GO:0001525]; axon guidance [GO:0007411]; decidualization [GO:0046697]; dendrite self-avoidance [GO:0070593]; embryo implantation [GO:0007566]; endothelial tube morphogenesis [GO:0061154]; homophilic cell adhesion via plasma membrane adhesion molecules [GO:0007156]; neural retina development [GO:0003407]; neutrophil chemotaxis [GO:0030593]; odontogenesis of dentin-containing tooth [G…	cell-cell adhesion mediator activity [GO:0098632]; mannose binding [GO:0005537]; signaling receptor activity [GO:0038023]; virus receptor activity [GO:0001618]	acrosomal membrane [GO:0002080]; axon [GO:0030424]; basolateral plasma membrane [GO:0016323]; endoplasmic reticulum membrane [GO:0005789]; endosome [GO:0005768]; integral component of plasma membrane [GO:0005887]; intracellular membrane-bounded organelle [GO:0043231]; membrane raft [GO:0045121]; mitochondrion [GO:0005739]; photoreceptor inner segment [GO:0001917]; photoreceptor outer segment [GO:…	GO:0001525; GO:0001618; GO:0001750; GO:0001917; GO:0002080; GO:0003407; GO:0005537; GO:0005739; GO:0005768; GO:0005789; GO:0005886; GO:0005887; GO:0007156; GO:0007283; GO:0007411; GO:0007566; GO:0010575; GO:0010595; GO:0016323; GO:0030424; GO:0030593; GO:0032755; GO:0038023; GO:0042383; GO:0042475; GO:0043231; GO:0043434; GO:0045121; GO:0045494; GO:0046598; GO:0046689; GO:0046697; GO:0051591; GO:…	R-MMU-1474228;R-MMU-210991;R-MMU-216083;R-MMU-433692;R-MMU-70268;	mmu:12215;	17.407	17.5293	17.4666	17.4715	17.5563	17.9943	17.9744	17.9239	17.759	17.8859
Idh3a_Q9D6R2	-0.908374	-0.759757	-0.535716	-1.26998	-1.05681	1.17517	1.23747	0.967789	0.762826	0.387375	Idh3a	Isocitrate dehydrogenase [NAD] subunit alpha, mitochondrial	Q9D6R2	1.02207	2.17079e-05	0.0027046	-0.399889	sp|Q9D6R2|IDH3A_MOUSE Isocitrate dehydrogenase [NAD] subunit alpha, mitochondrial OS=Mus musculus OX=10090 GN=Idh3a PE=1 SV=1	FUNCTION: Catalytic subunit of the enzyme which catalyzes the decarboxylation of isocitrate (ICT) into alpha-ketoglutarate. The heterodimer composed of the alpha (IDH3A) and beta (IDH3B) subunits and the heterodimer composed of the alpha (IDH3A) and gamma (IDH3G) subunits, have considerable basal activity but the full activity of the heterotetramer (containing two subunits of IDH3A, one of IDH3B …	SUBCELLULAR LOCATION: Mitochondrion {ECO:0000250}.		2-oxoglutarate metabolic process [GO:0006103]; isocitrate metabolic process [GO:0006102]; NADH metabolic process [GO:0006734]; tricarboxylic acid cycle [GO:0006099]	isocitrate dehydrogenase (NAD+) activity [GO:0004449]; magnesium ion binding [GO:0000287]; NAD binding [GO:0051287]	mitochondrion [GO:0005739]; myelin sheath [GO:0043209]	GO:0000287; GO:0004449; GO:0005739; GO:0006099; GO:0006102; GO:0006103; GO:0006734; GO:0043209; GO:0051287	R-MMU-71403;	mmu:67834;	18.1147	18.1475	18.1969	18.0349	18.0819	18.5745	18.5882	18.5287	18.4835	18.4006
Amotl2_Q8K371	-0.829397	-0.907078	-1.2463	-0.915027	-0.490089	0.98241	0.796282	1.52414	0.125582	0.959478	Amotl2	Angiomotin-like protein 2	Q8K371	1.04453	2.20383e-05	0.0027046	-0.593091	sp|Q8K371|AMOL2_MOUSE Angiomotin-like protein 2 OS=Mus musculus OX=10090 GN=Amotl2 PE=1 SV=1	FUNCTION: Regulates the translocation of phosphorylated SRC to peripheral cell-matrix adhesion sites. Required for proper architecture of actin filaments. Inhibits the Wnt/beta-catenin signaling pathway, probably by recruiting CTNNB1 to recycling endosomes and hence preventing its translocation to the nucleus. Participates in angiogenesis. May play a role in the polarity, proliferation and migrat…	SUBCELLULAR LOCATION: Recycling endosome {ECO:0000250}.		actin cytoskeleton organization [GO:0030036]; angiogenesis [GO:0001525]; establishment of cell polarity involved in ameboidal cell migration [GO:0003365]; hippo signaling [GO:0035329]; regulation of cell migration [GO:0030334]; Wnt signaling pathway [GO:0016055]	identical protein binding [GO:0042802]	apical plasma membrane [GO:0016324]; bicellular tight junction [GO:0005923]; cytoplasmic vesicle [GO:0031410]; plasma membrane [GO:0005886]; recycling endosome [GO:0055037]	GO:0001525; GO:0003365; GO:0005886; GO:0005923; GO:0016055; GO:0016324; GO:0030036; GO:0030334; GO:0031410; GO:0035329; GO:0042802; GO:0055037	R-MMU-2028269;	mmu:56332;	13.3352	13.3089	13.1943	13.3062	13.4498	13.9474	13.8845	14.1305	13.6579	13.9397
Serpina1d_Q00897	-0.504734	-0.834579	-0.498392	-0.980453	-1.56739	0.965397	1.27126	1.15958	0.50503	0.484279	Serpina1d	Alpha-1-antitrypsin 1-4	Q00897	1.0327	2.2392e-05	0.0027046	-0.595373	sp|Q00897|A1AT4_MOUSE Alpha-1-antitrypsin 1-4 OS=Mus musculus OX=10090 GN=Serpina1d PE=1 SV=1	FUNCTION: Inhibitor of serine proteases. Can inhibit trypsin and chymotrypsin; relatively ineffective against elastase. {ECO:0000269|PubMed:11961105, ECO:0000269|PubMed:8619829}.	SUBCELLULAR LOCATION: Secreted {ECO:0000269|PubMed:11961105, ECO:0000269|PubMed:8619829}.		negative regulation of endopeptidase activity [GO:0010951]; response to cytokine [GO:0034097]; response to peptide hormone [GO:0043434]	endopeptidase inhibitor activity [GO:0004866]; identical protein binding [GO:0042802]; protease binding [GO:0002020]; serine-type endopeptidase inhibitor activity [GO:0004867]	endoplasmic reticulum [GO:0005783]; extracellular region [GO:0005576]; extracellular space [GO:0005615]; Golgi apparatus [GO:0005794]; intracellular membrane-bounded organelle [GO:0043231]	GO:0002020; GO:0004866; GO:0004867; GO:0005576; GO:0005615; GO:0005783; GO:0005794; GO:0010951; GO:0034097; GO:0042802; GO:0043231; GO:0043434		mmu:20703;	18.3334	18.2215	18.3356	18.172	17.9728	18.8324	18.9362	18.8983	18.6761	18.6691
Nek9_Q8K1R7	-0.792447	-0.796143	-1.105	-1.16773	-0.670775	1.10743	1.1277	1.29196	0.37741	0.627597	Nek9	Serine/threonine-protein kinase Nek9	Q8K1R7	1.02345	2.30549e-05	0.0027046	-0.394366	sp|Q8K1R7|NEK9_MOUSE Serine/threonine-protein kinase Nek9 OS=Mus musculus OX=10090 GN=Nek9 PE=1 SV=2	FUNCTION: Pleiotropic regulator of mitotic progression, participating in the control of spindle dynamics and chromosome separation. Phosphorylates different histones, myelin basic protein, beta-casein, and BICD2. Phosphorylates histone H3 on serine and threonine residues and beta-casein on serine residues Important for G1/S transition and S phase progression. Phosphorylates NEK6 and NEK7 and stim…	SUBCELLULAR LOCATION: Cytoplasm {ECO:0000250}. Nucleus {ECO:0000250}.		cell cycle [GO:0007049]; cell division [GO:0051301]	ATP binding [GO:0005524]; metal ion binding [GO:0046872]; protein kinase binding [GO:0019901]; protein serine kinase activity [GO:0106310]; protein threonine kinase activity [GO:0106311]	cytoplasm [GO:0005737]; nucleus [GO:0005634]	GO:0005524; GO:0005634; GO:0005737; GO:0007049; GO:0019901; GO:0046872; GO:0051301; GO:0106310; GO:0106311	R-MMU-2980767;	mmu:217718;	16.8419	16.8411	16.7739	16.7602	16.8683	17.2552	17.2596	17.2953	17.0964	17.1508
Chp1_P61022	-0.401148	-0.594463	-0.923571	-1.3468	-1.15619	1.3991	0.688333	1.14084	0.461737	0.732163	Chp1	Calcineurin B homologous protein 1	P61022	1.03104	2.35258e-05	0.0027046	-0.509228	sp|P61022|CHP1_MOUSE Calcineurin B homologous protein 1 OS=Mus musculus OX=10090 GN=Chp1 PE=1 SV=2	FUNCTION: Calcium-binding protein involved in different processes such as regulation of vesicular trafficking, plasma membrane Na(+)/H(+) exchanger and gene transcription. Involved in the constitutive exocytic membrane traffic. Mediates the association between microtubules and membrane-bound organelles of the endoplasmic reticulum and Golgi apparatus and is also required for the targeting and fus…	SUBCELLULAR LOCATION: Nucleus {ECO:0000250|UniProtKB:P61023}. Cytoplasm {ECO:0000250|UniProtKB:P61023}. Cytoplasm, cytoskeleton {ECO:0000250|UniProtKB:P61023}. Endomembrane system {ECO:0000250|UniProtKB:P61023}. Endoplasmic reticulum-Golgi intermediate compartment {ECO:0000250|UniProtKB:P61023}. Endoplasmic reticulum {ECO:0000250|UniProtKB:P61023}. Cell membrane {ECO:0000250|UniProtKB:P61023}. Me…		cellular response to acidic pH [GO:0071468]; cytoplasmic microtubule organization [GO:0031122]; membrane docking [GO:0022406]; membrane fusion [GO:0061025]; membrane organization [GO:0061024]; microtubule bundle formation [GO:0001578]; negative regulation of calcineurin-NFAT signaling cascade [GO:0070885]; negative regulation of NF-kappaB transcription factor activity [GO:0032088]; negative regul…	calcium-dependent protein binding [GO:0048306]; calcium ion binding [GO:0005509]; kinase binding [GO:0019900]; microtubule binding [GO:0008017]; protein kinase inhibitor activity [GO:0004860]	cytoplasm [GO:0005737]; cytosol [GO:0005829]; endoplasmic reticulum [GO:0005783]; endoplasmic reticulum-Golgi intermediate compartment [GO:0005793]; Golgi membrane [GO:0000139]; microtubule cytoskeleton [GO:0015630]; nucleus [GO:0005634]; plasma membrane [GO:0005886]; transport vesicle [GO:0030133]	GO:0000139; GO:0001578; GO:0001933; GO:0004860; GO:0005509; GO:0005634; GO:0005737; GO:0005783; GO:0005793; GO:0005829; GO:0005886; GO:0006469; GO:0006611; GO:0006903; GO:0006906; GO:0008017; GO:0010923; GO:0015630; GO:0019900; GO:0022406; GO:0030133; GO:0031122; GO:0031397; GO:0031953; GO:0032088; GO:0032417; GO:0042308; GO:0048306; GO:0050821; GO:0051222; GO:0051259; GO:0051453; GO:0060050; GO:…	R-MMU-2160916;	mmu:56398;	16.544	16.4884	16.3936	16.2718	16.3266	17.0623	16.8577	16.9879	16.7924	16.8703
Mug1_P28665	-0.547486	-1.22203	-0.700833	-0.864093	-1.07777	1.08532	1.19621	1.22391	0.83391	0.0728763	Mug1	Murinoglobulin-1	P28665	1.02686	2.3675e-05	0.0027046	-0.525276	sp|P28665|MUG1_MOUSE Murinoglobulin-1 OS=Mus musculus OX=10090 GN=Mug1 PE=1 SV=3	FUNCTION: A proteinase activates the inhibitor by specific proteolysis in the bait region, which, by an unknown mechanism leads to reaction at the cysteinyl-glutamyl internal thiol ester site and to a conformational change, whereby the proteinase is trapped and/or covalently bound to the inhibitor. While in the tetrameric proteinase inhibitors steric inhibition is sufficiently strong, monomeric f…	SUBCELLULAR LOCATION: Secreted.		embryo implantation [GO:0007566]	endopeptidase inhibitor activity [GO:0004866]; protease binding [GO:0002020]; serine-type endopeptidase inhibitor activity [GO:0004867]	extracellular space [GO:0005615]	GO:0002020; GO:0004866; GO:0004867; GO:0005615; GO:0007566		mmu:17836;	19.6542	19.4534	19.6085	19.5599	19.4963	20.1401	20.1731	20.1814	20.0653	19.8388
Igfbp6_P47880	-0.999768	-1.13354	-1.33616	-0.981775	0.142913	1.08201	0.975069	0.973152	0.464968	0.81314	Igfbp6	Insulin-like growth factor-binding protein 6	P47880	1.07015	2.41613e-05	0.0027046	-1.00444	sp|P47880|IBP6_MOUSE Insulin-like growth factor-binding protein 6 OS=Mus musculus OX=10090 GN=Igfbp6 PE=2 SV=2	FUNCTION: IGF-binding proteins prolong the half-life of the IGFs and have been shown to either inhibit or stimulate the growth promoting effects of the IGFs on cell culture. They alter the interaction of IGFs with their cell surface receptors. Activates the MAPK signaling pathway and induces cell migration. {ECO:0000250|UniProtKB:P24592}.	SUBCELLULAR LOCATION: Secreted.		activation of MAPK activity [GO:0000187]; cell migration [GO:0016477]; regulation of insulin-like growth factor receptor signaling pathway [GO:0043567]	fibronectin binding [GO:0001968]; identical protein binding [GO:0042802]; insulin-like growth factor I binding [GO:0031994]; insulin-like growth factor II binding [GO:0031995]	collagen-containing extracellular matrix [GO:0062023]; cytoplasm [GO:0005737]; extracellular space [GO:0005615]; Golgi apparatus [GO:0005794]; insulin-like growth factor binary complex [GO:0042568]	GO:0000187; GO:0001968; GO:0005615; GO:0005737; GO:0005794; GO:0016477; GO:0031994; GO:0031995; GO:0042568; GO:0042802; GO:0043567; GO:0062023	R-MMU-381426;	mmu:16012;	14.2378	14.1598	14.0417	14.2482	14.9038	15.4511	15.3888	15.3877	15.0915	15.2944
Ephx1_Q9D379	-1.36709	-0.765363	-0.466115	-1.29156	-0.63794	0.997435	1.11316	0.993098	0.616565	0.807809	Ephx1	Epoxide hydrolase 1	Q9D379	1.02276	2.47244e-05	0.0027046	-0.392078	sp|Q9D379|HYEP_MOUSE Epoxide hydrolase 1 OS=Mus musculus OX=10090 GN=Ephx1 PE=1 SV=2	FUNCTION: Biotransformation enzyme that catalyzes the hydrolysis of arene and aliphatic epoxides to less reactive and more water soluble dihydrodiols by the trans addition of water. May play a role in the metabolism of endogenous lipids such as epoxide-containing fatty acids. Metabolizes the abundant endocannabinoid 2-arachidonoylglycerol (2-AG) to free arachidonic acid (AA) and glycerol (By simi…	SUBCELLULAR LOCATION: Microsome membrane {ECO:0000250|UniProtKB:P07687}; Single-pass type III membrane protein {ECO:0000250|UniProtKB:P07687}. Endoplasmic reticulum membrane {ECO:0000250|UniProtKB:P07687}; Single-pass type III membrane protein {ECO:0000250|UniProtKB:P07687}.		arachidonic acid metabolic process [GO:0019369]; aromatic compound catabolic process [GO:0019439]; cellular aromatic compound metabolic process [GO:0006725]; cellular response to glucocorticoid stimulus [GO:0071385]; diol biosynthetic process [GO:0034312]; epoxide metabolic process [GO:0097176]; liver development [GO:0001889]; response to organic cyclic compound [GO:0014070]; response to toxic su…	cis-stilbene-oxide hydrolase activity [GO:0033961]; enzyme binding [GO:0019899]; epoxide hydrolase activity [GO:0004301]	endoplasmic reticulum membrane [GO:0005789]; integral component of membrane [GO:0016021]; intracellular membrane-bounded organelle [GO:0043231]; membrane [GO:0016020]; plasma membrane [GO:0005886]	GO:0001889; GO:0004301; GO:0005789; GO:0005886; GO:0006725; GO:0009636; GO:0014070; GO:0016020; GO:0016021; GO:0019369; GO:0019439; GO:0019899; GO:0033961; GO:0034312; GO:0043231; GO:0071385; GO:0097176	R-MMU-211945;	mmu:13849;	17.1275	17.2577	17.3225	17.1438	17.2853	17.6393	17.6644	17.6384	17.5569	17.5983
Mccc1_Q99MR8	-0.55232	-1.22499	-0.86064	-0.950321	-0.897868	1.14828	0.551703	1.5036	0.503184	0.779374	Mccc1	Methylcrotonoyl-CoA carboxylase subunit alpha, mitochondrial	Q99MR8	1.02347	2.51006e-05	0.0027046	-0.424014	sp|Q99MR8|MCCA_MOUSE Methylcrotonoyl-CoA carboxylase subunit alpha, mitochondrial OS=Mus musculus OX=10090 GN=Mccc1 PE=1 SV=2	FUNCTION: Biotin-attachment subunit of the 3-methylcrotonyl-CoA carboxylase, an enzyme that catalyzes the conversion of 3-methylcrotonyl-CoA to 3-methylglutaconyl-CoA, a critical step for leucine and isovaleric acid catabolism. {ECO:0000250}.	SUBCELLULAR LOCATION: Mitochondrion matrix {ECO:0000250}.		leucine catabolic process [GO:0006552]	ATP binding [GO:0005524]; CoA carboxylase activity [GO:0016421]; metal ion binding [GO:0046872]; methylcrotonoyl-CoA carboxylase activity [GO:0004485]	3-methylcrotonyl-CoA carboxylase complex, mitochondrial [GO:0002169]; methylcrotonoyl-CoA carboxylase complex [GO:1905202]; mitochondrial inner membrane [GO:0005743]; mitochondrial matrix [GO:0005759]; mitochondrion [GO:0005739]	GO:0002169; GO:0004485; GO:0005524; GO:0005739; GO:0005743; GO:0005759; GO:0006552; GO:0016421; GO:0046872; GO:1905202	R-MMU-196780;R-MMU-70895;	mmu:72039;	18.1482	17.9893	18.0754	18.0542	18.0666	18.5501	18.4091	18.634	18.3976	18.4629
Rmdn1_Q9DCV4	-0.953667	-1.13157	-1.01666	-0.914005	-0.410587	1.19483	0.97127	1.2837	0.860273	0.116425	Rmdn1	Regulator of microtubule dynamics protein 1	Q9DCV4	1.03126	2.51388e-05	0.0027046	-0.492459	sp|Q9DCV4|RMD1_MOUSE Regulator of microtubule dynamics protein 1 OS=Mus musculus OX=10090 GN=Rmdn1 PE=1 SV=2		SUBCELLULAR LOCATION: Cytoplasm {ECO:0000250}. Cytoplasm, cytoskeleton, spindle {ECO:0000250}. Cytoplasm, cytoskeleton, spindle pole {ECO:0000250}. Note=In interphase localizes in the cytoplasm, and during mitosis localizes to the spindle microtubules and spindle poles. {ECO:0000250}.			microtubule binding [GO:0008017]	mitochondrion [GO:0005739]; mitotic spindle pole [GO:0097431]; spindle microtubule [GO:0005876]	GO:0005739; GO:0005876; GO:0008017; GO:0097431		mmu:66302;	15.7369	15.6874	15.7193	15.7479	15.8879	16.3344	16.2723	16.3591	16.2414	16.0345
Sparcl1_P70663	-0.653225	-1.26245	-1.38772	-0.54134	-0.510192	0.84074	1.33054	1.21001	0.693096	0.280543	Sparcl1	SPARC-like protein 1	P70663	1.04319	2.63339e-05	0.00277291	-0.641734	sp|P70663|SPRL1_MOUSE SPARC-like protein 1 OS=Mus musculus OX=10090 GN=Sparcl1 PE=1 SV=3		SUBCELLULAR LOCATION: Secreted, extracellular space, extracellular matrix.		anatomical structure development [GO:0048856]; signal transduction [GO:0007165]; synaptic membrane adhesion [GO:0099560]	calcium ion binding [GO:0005509]; collagen binding [GO:0005518]; extracellular matrix binding [GO:0050840]	extracellular matrix of synaptic cleft [GO:0098965]; extracellular space [GO:0005615]; glutamatergic synapse [GO:0098978]; synapse [GO:0045202]	GO:0005509; GO:0005518; GO:0005615; GO:0007165; GO:0045202; GO:0048856; GO:0050840; GO:0098965; GO:0098978; GO:0099560	R-MMU-381426;R-MMU-8957275;	mmu:13602;	14.9373	14.7128	14.6667	14.9785	14.99	15.4876	15.6681	15.6237	15.4333	15.2813
Syap1_Q9D5V6	-1.32819	-0.785545	-1.04803	-1.05436	-0.218244	1.10964	0.66267	1.04417	0.427063	1.19082	Syap1	Synapse-associated protein 1	Q9D5V6	1.02816	2.69435e-05	0.00277798	-0.472043	sp|Q9D5V6|SYAP1_MOUSE Synapse-associated protein 1 OS=Mus musculus OX=10090 GN=Syap1 PE=1 SV=1	FUNCTION: Plays a role in adipocyte differentiation by promoting mTORC2-mediated phosphorylation of AKT1 at 'Ser-473' after growth factor stimulation (PubMed:23300339). {ECO:0000269|PubMed:23300339}.	SUBCELLULAR LOCATION: Cytoplasm, perinuclear region {ECO:0000269|PubMed:27344443}. Golgi apparatus {ECO:0000269|PubMed:27344443}. Perikaryon {ECO:0000269|PubMed:27344443}. Cell projection, axon {ECO:0000269|PubMed:27344443}. Cell projection, dendrite {ECO:0000269|PubMed:27344443}. Cell projection, growth cone {ECO:0000269|PubMed:27344443}. Cell junction, synapse, presynaptic cell membrane {ECO:00…		cell differentiation [GO:0030154]; cellular response to epidermal growth factor stimulus [GO:0071364]; cellular response to insulin-like growth factor stimulus [GO:1990314]; cellular response to insulin stimulus [GO:0032869]; cellular response to platelet-derived growth factor stimulus [GO:0036120]; positive regulation of fat cell differentiation [GO:0045600]; positive regulation of protein serin…		axon [GO:0030424]; cytosol [GO:0005829]; dendrite [GO:0030425]; extrinsic component of cytoplasmic side of plasma membrane [GO:0031234]; Golgi apparatus [GO:0005794]; growth cone [GO:0030426]; nucleoplasm [GO:0005654]; nucleus [GO:0005634]; perikaryon [GO:0043204]; perinuclear region of cytoplasm [GO:0048471]; postsynaptic membrane [GO:0045211]; presynaptic membrane [GO:0042734]	GO:0005634; GO:0005654; GO:0005794; GO:0005829; GO:0030154; GO:0030424; GO:0030425; GO:0030426; GO:0031234; GO:0032869; GO:0036120; GO:0038203; GO:0042734; GO:0043204; GO:0045211; GO:0045600; GO:0048471; GO:0071364; GO:0071902; GO:1990314		mmu:67043;	16.6429	16.7873	16.7175	16.7158	16.9383	17.2917	17.1728	17.2743	17.1101	17.3133
Calml3_P0DP28	-0.531796	-0.778766	-0.888968	-0.926269	-1.17368	1.24979	1.06352	1.33738	-0.118795	0.767589	Calml3	Calmodulin-like protein 3	P0DP28	1.04968	2.91937e-05	0.00294856	-0.904695	sp|P0DP28|CALM3_MOUSE Calmodulin-3 OS=Mus musculus OX=10090 GN=Calm3 PE=1 SV=1;sp|P0DP27|CALM2_MOUSE Calmodulin-2 OS=Mus musculus OX=10090 GN=Calm2 PE=1 SV=1;sp|P0DP26|CALM1_MOUSE Calmodulin-1 OS=Mus musculus OX=10090 GN=Calm1 PE=1 SV=1;sp|Q9D6P8|CALL3_MOU	FUNCTION: Calmodulin mediates the control of a large number of enzymes, ion channels, aquaporins and other proteins through calcium-binding. Is a regulator of voltage-dependent L-type calcium channels. Among the enzymes to be stimulated by the calmodulin-calcium complex are a number of protein kinases and phosphatases. Together with CCP110 and centrin, is involved in a genetic pathway that regula…	SUBCELLULAR LOCATION: Cytoplasm, cytoskeleton, spindle. Cytoplasm, cytoskeleton, spindle pole. Note=Distributed throughout the cell during interphase, but during mitosis becomes dramatically localized to the spindle poles and the spindle microtubules. {ECO:0000250}.		activation of adenylate cyclase activity [GO:0007190]; calcium-mediated signaling [GO:0019722]; detection of calcium ion [GO:0005513]; establishment of protein localization to mitochondrial membrane [GO:0090151]; G2/M transition of mitotic cell cycle [GO:0000086]; microtubule cytoskeleton organization [GO:0000226]; negative regulation of high voltage-gated calcium channel activity [GO:1901842]; n…	adenylate cyclase activator activity [GO:0010856]; adenylate cyclase binding [GO:0008179]; calcium channel inhibitor activity [GO:0019855]; calcium-dependent protein binding [GO:0048306]; calcium ion binding [GO:0005509]; disordered domain specific binding [GO:0097718]; enzyme regulator activity [GO:0030234]; ion channel binding [GO:0044325]; nitric-oxide synthase binding [GO:0050998]; nitric-oxi…	calcium channel complex [GO:0034704]; catalytic complex [GO:1902494]; centrosome [GO:0005813]; cytoplasm [GO:0005737]; growth cone [GO:0030426]; mitochondrial membrane [GO:0031966]; myelin sheath [GO:0043209]; neuron projection [GO:0043005]; nucleus [GO:0005634]; plasma membrane [GO:0005886]; sarcomere [GO:0030017]; spindle microtubule [GO:0005876]; spindle pole [GO:0000922]; synaptic vesicle mem…	GO:0000086; GO:0000226; GO:0000922; GO:0001975; GO:0002027; GO:0005509; GO:0005513; GO:0005634; GO:0005737; GO:0005813; GO:0005876; GO:0005886; GO:0007190; GO:0008076; GO:0008179; GO:0010856; GO:0010880; GO:0019722; GO:0019855; GO:0019901; GO:0019904; GO:0030017; GO:0030234; GO:0030235; GO:0030426; GO:0030672; GO:0031432; GO:0031800; GO:0031966; GO:0031997; GO:0032465; GO:0032516; GO:0034704; GO:…		mmu:12313;mmu:12314;mmu:12315;	18.3823	18.2524	18.1944	18.1748	18.0446	19.3195	19.2215	19.3655	18.5995	19.0658
Gsn_P13020	-0.714066	-1.4317	-0.845823	-0.877383	-0.602621	1.52006	0.71048	0.99765	0.55745	0.685951	Gsn	Gelsolin	P13020	1.02129	3.03836e-05	0.00300737	-0.419106	sp|P13020|GELS_MOUSE Gelsolin OS=Mus musculus OX=10090 GN=Gsn PE=1 SV=3	FUNCTION: Calcium-regulated, actin-modulating protein that binds to the plus (or barbed) ends of actin monomers or filaments, preventing monomer exchange (end-blocking or capping). It can promote the assembly of monomers into filaments (nucleation) as well as sever filaments already formed. Plays a role in ciliogenesis.	SUBCELLULAR LOCATION: [Isoform 2]: Cytoplasm, cytoskeleton.; SUBCELLULAR LOCATION: [Isoform 1]: Secreted.		actin cytoskeleton organization [GO:0030036]; actin filament capping [GO:0051693]; actin filament depolymerization [GO:0030042]; actin filament polymerization [GO:0030041]; actin filament reorganization [GO:0090527]; actin filament severing [GO:0051014]; actin nucleation [GO:0045010]; actin polymerization or depolymerization [GO:0008154]; aging [GO:0007568]; amyloid fibril formation [GO:1990000];…	actin binding [GO:0003779]; actin filament binding [GO:0051015]; calcium ion binding [GO:0005509]; myosin II binding [GO:0045159]; phosphatidylinositol 3-kinase catalytic subunit binding [GO:0036313]; phosphatidylinositol-4,5-bisphosphate binding [GO:0005546]	actin cap [GO:0030478]; actin cytoskeleton [GO:0015629]; cortical actin cytoskeleton [GO:0030864]; cytoplasm [GO:0005737]; cytosol [GO:0005829]; extracellular region [GO:0005576]; extracellular space [GO:0005615]; lamellipodium [GO:0030027]; myelin sheath [GO:0043209]; nucleus [GO:0005634]; perinuclear region of cytoplasm [GO:0048471]; phagocytic vesicle [GO:0045335]; plasma membrane [GO:0005886]…	GO:0001726; GO:0002102; GO:0003779; GO:0005509; GO:0005546; GO:0005576; GO:0005615; GO:0005634; GO:0005737; GO:0005829; GO:0005886; GO:0006911; GO:0006915; GO:0007417; GO:0007568; GO:0008154; GO:0010628; GO:0014003; GO:0014891; GO:0015629; GO:0016192; GO:0016528; GO:0030027; GO:0030031; GO:0030036; GO:0030041; GO:0030042; GO:0030155; GO:0030478; GO:0030864; GO:0031648; GO:0032991; GO:0035994; GO:…		mmu:227753;	19.7232	19.5551	19.6924	19.685	19.7494	20.2467	20.057	20.1243	20.0212	20.0513
Gc_P21614	-0.619758	-1.38866	-0.356921	-0.590863	-1.45011	1.04758	0.700689	1.20467	0.647954	0.805428	Gc	Vitamin D-binding protein	P21614	1.02532	3.20236e-05	0.00310754	-0.486121	sp|P21614|VTDB_MOUSE Vitamin D-binding protein OS=Mus musculus OX=10090 GN=Gc PE=1 SV=2	FUNCTION: Involved in vitamin D transport and storage, scavenging of extracellular G-actin, enhancement of the chemotactic activity of C5 alpha for neutrophils in inflammation and macrophage activation. {ECO:0000250|UniProtKB:P02774}.	SUBCELLULAR LOCATION: Secreted {ECO:0000269|PubMed:10052453}.		vitamin D metabolic process [GO:0042359]	actin binding [GO:0003779]; calcidiol binding [GO:1902118]; vitamin D binding [GO:0005499]; vitamin transmembrane transporter activity [GO:0090482]	axon [GO:0030424]; cytoplasm [GO:0005737]; cytosol [GO:0005829]; extracellular space [GO:0005615]; perinuclear region of cytoplasm [GO:0048471]	GO:0003779; GO:0005499; GO:0005615; GO:0005737; GO:0005829; GO:0030424; GO:0042359; GO:0048471; GO:0090482; GO:1902118	R-MMU-196791;	mmu:14473;	19.2693	19.0573	19.3418	19.2773	19.0403	19.7292	19.6335	19.7725	19.619	19.6624
Pros1_Q08761	-1.08531	-0.650896	-0.905267	-0.941473	-0.850657	0.924356	1.07258	0.240284	1.59534	0.601042	Pros1	Vitamin K-dependent protein S	Q08761	1.03686	3.90497e-05	0.00339312	-0.42889	sp|Q08761|PROS_MOUSE Vitamin K-dependent protein S OS=Mus musculus OX=10090 GN=Pros1 PE=2 SV=1	FUNCTION: Anticoagulant plasma protein; it is a cofactor to activated protein C in the degradation of coagulation factors Va and VIIIa. It helps to prevent coagulation and stimulating fibrinolysis.	SUBCELLULAR LOCATION: Secreted.		blood coagulation [GO:0007596]; fibrinolysis [GO:0042730]; negative regulation of coagulation [GO:0050819]; positive regulation of phagocytosis [GO:0050766]	calcium ion binding [GO:0005509]; protein-containing complex binding [GO:0044877]	extracellular space [GO:0005615]; protein-containing complex [GO:0032991]	GO:0005509; GO:0005615; GO:0007596; GO:0032991; GO:0042730; GO:0044877; GO:0050766; GO:0050819	R-MMU-114608;R-MMU-140837;R-MMU-140875;R-MMU-159740;R-MMU-159763;R-MMU-159782;R-MMU-202733;	mmu:19128;	11.5887	11.6938	11.6322	11.6235	11.6454	12.0747	12.1106	11.9093	12.237	11.9965
Unc119_Q9Z2R6	-1.29605	-1.27851	-0.898234	-0.744362	-0.179515	0.659423	0.754908	0.928209	1.42489	0.62924	Unc119	Protein unc-119 homolog A	Q9Z2R6	1.03084	3.94331e-05	0.00339312	-0.469068	sp|Q9Z2R6|U119A_MOUSE Protein unc-119 homolog A OS=Mus musculus OX=10090 GN=Unc119 PE=1 SV=1	FUNCTION: Involved in synaptic functions in photoreceptor cells, the signal transduction in immune cells as a Src family kinase activator, endosome recycling, the uptake of bacteria and endocytosis, protein trafficking in sensory neurons and as lipid-binding chaperone with specificity for a diverse subset of myristoylated proteins. Specifically binds the myristoyl moiety of a subset of N-terminal…	SUBCELLULAR LOCATION: Cytoplasm, cytoskeleton, microtubule organizing center, centrosome {ECO:0000250|UniProtKB:Q13432}. Cytoplasm, cytoskeleton, spindle {ECO:0000250|UniProtKB:Q13432}. Cytoplasm, cytoskeleton, spindle pole {ECO:0000250|UniProtKB:Q13432}. Note=ocalizes to the centrosome in interphase cells and begins to translocate from the spindle pole to the spindle midzone after the onset of m…		endocytosis [GO:0006897]; lipoprotein transport [GO:0042953]; mitotic cytokinesis [GO:0000281]; negative regulation of caveolin-mediated endocytosis [GO:2001287]; negative regulation of clathrin-dependent endocytosis [GO:1900186]; nervous system development [GO:0007399]; positive regulation of protein tyrosine kinase activity [GO:0061098]; response to stimulus [GO:0050896]; visual perception [GO:…	lipid binding [GO:0008289]	centrosome [GO:0005813]; cytoplasm [GO:0005737]; intercellular bridge [GO:0045171]; spindle midzone [GO:0051233]; spindle pole [GO:0000922]	GO:0000281; GO:0000922; GO:0005737; GO:0005813; GO:0006897; GO:0007399; GO:0007601; GO:0008289; GO:0042953; GO:0045171; GO:0050896; GO:0051233; GO:0061098; GO:1900186; GO:2001287		mmu:22248;	15.0964	15.1011	15.2025	15.2436	15.3942	15.618	15.6435	15.6897	15.8222	15.61
Gpihbp1_Q9D1N2	-0.427008	-0.91042	-1.1293	-0.776338	-1.1438	0.877379	0.886695	1.13316	0.0917661	1.39786	Gpihbp1	Glycosylphosphatidylinositol-anchored high density lipoprotein-binding protein 1	Q9D1N2	1.0334	3.95606e-05	0.00339312	-0.481902	sp|Q9D1N2|HDBP1_MOUSE Glycosylphosphatidylinositol-anchored high density lipoprotein-binding protein 1 OS=Mus musculus OX=10090 GN=Gpihbp1 PE=1 SV=1	FUNCTION: Mediates the transport of lipoprotein lipase LPL from the basolateral to the apical surface of endothelial cells in capillaries (PubMed:20620994). Anchors LPL on the surface of endothelial cells in the lumen of blood capillaries (PubMed:20620994, PubMed:24726386, PubMed:27811232). Thereby, plays an important role in lipolytic processing of chylomicrons by LPL, triglyceride metabolism an…	SUBCELLULAR LOCATION: Apical cell membrane {ECO:0000269|PubMed:20620994}; Lipid-anchor, GPI-anchor {ECO:0000269|PubMed:17403372, ECO:0000269|PubMed:20620994, ECO:0000269|PubMed:25387803}. Basolateral cell membrane {ECO:0000269|PubMed:20620994}; Lipid-anchor, GPI-anchor {ECO:0000269|PubMed:17403372, ECO:0000269|PubMed:20620994, ECO:0000269|PubMed:25387803}. Cell membrane {ECO:0000269|PubMed:174033…		cholesterol homeostasis [GO:0042632]; intracellular protein transport [GO:0006886]; lipid transport [GO:0006869]; positive regulation of chylomicron remnant clearance [GO:0090321]; positive regulation of chylomicron remodeling [GO:0090319]; positive regulation of lipoprotein lipase activity [GO:0051006]; protein import [GO:0017038]; protein localization to cell surface [GO:0034394]; protein stabi…	chylomicron binding [GO:0035478]; high-density lipoprotein particle binding [GO:0008035]; lipase binding [GO:0035473]; lipid binding [GO:0008289]; lipoprotein particle binding [GO:0071813]; protein transporter activity [GO:0140318]	anchored component of membrane [GO:0031225]; anchored component of plasma membrane [GO:0046658]; apical plasma membrane [GO:0016324]; basolateral plasma membrane [GO:0016323]; cell surface [GO:0009986]; external side of plasma membrane [GO:0009897]; membrane [GO:0016020]; plasma membrane [GO:0005886]	GO:0005886; GO:0006869; GO:0006886; GO:0008035; GO:0008289; GO:0009897; GO:0009986; GO:0016020; GO:0016323; GO:0016324; GO:0017038; GO:0031225; GO:0034394; GO:0035473; GO:0035478; GO:0042632; GO:0045056; GO:0046658; GO:0050821; GO:0051006; GO:0070328; GO:0071813; GO:0090319; GO:0090321; GO:0140318	R-MMU-163125;R-MMU-8963889;R-MMU-8963901;R-MMU-975634;	mmu:68453;	14.5532	14.4205	14.3604	14.4573	14.3564	14.9115	14.914	14.9817	14.6957	15.0544
Slc9a3r2_Q9JHL1	-0.73617	-1.12107	-1.24084	-1.07334	-0.167775	1.05556	0.733646	1.13424	1.22761	0.188142	Slc9a3r2	Na(+)/H(+) exchange regulatory cofactor NHE-RF2	Q9JHL1	1.03587	4.0625e-05	0.00339312	-0.563336	sp|Q9JHL1|NHRF2_MOUSE Na(+)/H(+) exchange regulatory cofactor NHE-RF2 OS=Mus musculus OX=10090 GN=Slc9a3r2 PE=1 SV=2	FUNCTION: Scaffold protein that connects plasma membrane proteins with members of the ezrin/moesin/radixin family and thereby helps to link them to the actin cytoskeleton and to regulate their surface expression. Necessary for cAMP-mediated phosphorylation and inhibition of SLC9A3. May also act as scaffold protein in the nucleus (By similarity). {ECO:0000250}.	SUBCELLULAR LOCATION: Endomembrane system {ECO:0000250}; Peripheral membrane protein {ECO:0000250}. Nucleus {ECO:0000250}. Apical cell membrane {ECO:0000250}. Note=Localizes with EZR and PODXL at the apical cell membrane of glomerular epithelium cells and the sides of the food processes. Nuclear, in a punctate pattern (By similarity). {ECO:0000250}.		negative regulation of phosphatidylinositol 3-kinase signaling [GO:0014067]; positive regulation of ion transmembrane transport [GO:0034767]; protein localization to plasma membrane [GO:0072659]; sensory perception of sound [GO:0007605]	beta-catenin binding [GO:0008013]; low-density lipoprotein particle receptor binding [GO:0050750]; molecular adaptor activity [GO:0060090]; phosphatase binding [GO:0019902]; protein C-terminus binding [GO:0008022]; protein-membrane adaptor activity [GO:0043495]; protein N-terminus binding [GO:0047485]; signaling receptor binding [GO:0005102]	apical plasma membrane [GO:0016324]; cytoplasm [GO:0005737]; endomembrane system [GO:0012505]; nucleus [GO:0005634]; plasma membrane [GO:0005886]; protein-containing complex [GO:0032991]; stereocilium [GO:0032420]; stereocilium bundle [GO:0032421]	GO:0005102; GO:0005634; GO:0005737; GO:0005886; GO:0007605; GO:0008013; GO:0008022; GO:0012505; GO:0014067; GO:0016324; GO:0019902; GO:0032420; GO:0032421; GO:0032991; GO:0034767; GO:0043495; GO:0047485; GO:0050750; GO:0060090; GO:0072659		mmu:65962;	15.7494	15.6244	15.5856	15.6399	15.9338	16.3309	16.2264	16.3564	16.3867	16.0494
Sepp1_P70274	-0.943175	-1.05544	-0.769648	-0.693405	-0.999112	0.113164	1.15296	0.834757	1.4053	0.954607	Sepp1	Selenoprotein P	P70274	1.02741	4.15573e-05	0.00339312	-0.399383	sp|P70274|SEPP1_MOUSE Selenoprotein P OS=Mus musculus OX=10090 GN=Selenop PE=1 SV=3	FUNCTION: Might be responsible for some of the extracellular antioxidant defense properties of selenium or might be involved in the transport of selenium (By similarity). May supply selenium to tissues such as brain and testis. {ECO:0000250}.	SUBCELLULAR LOCATION: Secreted {ECO:0000269|PubMed:18174160}. Note=Passes from plasma into the glomerular filtrate where it is removed by endocytosis mediated by LRP2 in the proximal tubule epithelium. {ECO:0000269|PubMed:18174160}.		brain development [GO:0007420]; locomotory behavior [GO:0007626]; post-embryonic development [GO:0009791]; regulation of growth [GO:0040008]; selenium compound metabolic process [GO:0001887]; sexual reproduction [GO:0019953]	selenium binding [GO:0008430]	extracellular region [GO:0005576]; extracellular space [GO:0005615]	GO:0001887; GO:0005576; GO:0005615; GO:0007420; GO:0007626; GO:0008430; GO:0009791; GO:0019953; GO:0040008	R-MMU-114608;	mmu:20363;	14.5619	14.5368	14.6007	14.6178	14.5494	14.7983	15.0311	14.9598	15.0875	14.9867
Tmem205_Q91XE8	-0.883132	-0.502739	-0.744055	-1.51071	-0.73944	1.16341	0.633686	1.3229	0.252116	1.00796	Tmem205	Transmembrane protein 205	Q91XE8	1.02941	4.20651e-05	0.00339312	-0.482046	sp|Q91XE8|TM205_MOUSE Transmembrane protein 205 OS=Mus musculus OX=10090 GN=Tmem205 PE=1 SV=1		SUBCELLULAR LOCATION: Membrane {ECO:0000305}; Multi-pass membrane protein {ECO:0000305}.				integral component of membrane [GO:0016021]	GO:0016021		mmu:235043;	16.3874	16.4921	16.4257	16.2148	16.427	16.9505	16.8048	16.9944	16.6998	16.9077
Iqsec1_Q8R0S2	-0.707392	-1.14641	-0.980314	-0.881345	-0.634724	1.3604	0.961819	1.44908	0.261943	0.316953	Iqsec1	IQ motif and SEC7 domain-containing protein 1	Q8R0S2	1.03508	4.23904e-05	0.00339312	-0.530284	sp|Q8R0S2|IQEC1_MOUSE IQ motif and SEC7 domain-containing protein 1 OS=Mus musculus OX=10090 GN=Iqsec1 PE=1 SV=2	FUNCTION: Guanine nucleotide exchange factor for ARF1 and ARF6. Guanine nucleotide exchange factor activity is enhanced by lipid binding. Accelerates GTP binding by ARFs of all three classes. Guanine nucleotide exchange protein for ARF6, mediating internalisation of beta-1 integrin (By similarity). Involved in neuronal development (PubMed:31607425). In neurons, plays a role in the control of vesi…	SUBCELLULAR LOCATION: Cytoplasm {ECO:0000250|UniProtKB:Q6DN90}. Nucleus {ECO:0000250|UniProtKB:Q6DN90}. Cell junction, synapse, postsynaptic density {ECO:0000269|PubMed:20547133}. Cytoplasmic vesicle, secretory vesicle, synaptic vesicle {ECO:0000269|PubMed:20547133}. Note=At steady state, may be preferentially cytosolic. {ECO:0000250|UniProtKB:Q6DN90}.		actin cytoskeleton organization [GO:0030036]; dendritic spine development [GO:0060996]; positive regulation of focal adhesion disassembly [GO:0120183]; positive regulation of GTPase activity [GO:0043547]; positive regulation of keratinocyte migration [GO:0051549]; regulation of ARF protein signal transduction [GO:0032012]; regulation of postsynaptic neurotransmitter receptor internalization [GO:0…	ARF guanyl-nucleotide exchange factor activity [GO:0005086]; lipid binding [GO:0008289]; protein kinase binding [GO:0019901]	glutamatergic synapse [GO:0098978]; intracellular membrane-bounded organelle [GO:0043231]; nucleolus [GO:0005730]; postsynaptic density, intracellular component [GO:0099092]; Schaffer collateral - CA1 synapse [GO:0098685]; synaptic vesicle [GO:0008021]	GO:0005086; GO:0005730; GO:0008021; GO:0008289; GO:0019901; GO:0030036; GO:0032012; GO:0043231; GO:0043547; GO:0051549; GO:0060996; GO:0098685; GO:0098978; GO:0099092; GO:0099149; GO:0120183		mmu:232227;	15.1677	15.0339	15.0845	15.1147	15.1898	15.7979	15.6764	15.8249	15.4631	15.4799
Serpina7_P61939	-0.635717	-0.855888	-0.51215	-1.30049	-1.10367	1.05337	0.976054	1.49693	0.442531	0.439035	Serpina7	Thyroxine-binding globulin	P61939	1.0295	4.30976e-05	0.00339312	-0.443955	sp|P61939|THBG_MOUSE Thyroxine-binding globulin OS=Mus musculus OX=10090 GN=Serpina7 PE=2 SV=1	FUNCTION: Major thyroid hormone transport protein in serum. {ECO:0000250}.	SUBCELLULAR LOCATION: Secreted {ECO:0000250}.		negative regulation of endopeptidase activity [GO:0010951]; post-embryonic development [GO:0009791]; response to drug [GO:0042493]; response to vitamin A [GO:0033189]; thyroid hormone transport [GO:0070327]	hormone binding [GO:0042562]; serine-type endopeptidase inhibitor activity [GO:0004867]	extracellular space [GO:0005615]	GO:0004867; GO:0005615; GO:0009791; GO:0010951; GO:0033189; GO:0042493; GO:0042562; GO:0070327			15.1114	15.056	15.1425	14.944	14.9936	15.5367	15.5172	15.6484	15.3829	15.382
Cryl1_Q99KP3	-0.543559	-1.30536	-1.0336	-0.668476	-0.86326	0.765034	1.40715	1.24225	0.24319	0.756638	Cryl1	Lambda-crystallin homolog	Q99KP3	1.02628	4.47032e-05	0.00339312	-0.432949	sp|Q99KP3|CRYL1_MOUSE Lambda-crystallin homolog OS=Mus musculus OX=10090 GN=Cryl1 PE=1 SV=3		SUBCELLULAR LOCATION: Cytoplasm {ECO:0000250}.		fatty acid metabolic process [GO:0006631]	3-hydroxyacyl-CoA dehydrogenase activity [GO:0003857]; L-gulonate 3-dehydrogenase activity [GO:0050104]; NAD+ binding [GO:0070403]; oxidoreductase activity, acting on the CH-OH group of donors, NAD or NADP as acceptor [GO:0016616]; protein homodimerization activity [GO:0042803]	cytosol [GO:0005829]	GO:0003857; GO:0005829; GO:0006631; GO:0016616; GO:0042803; GO:0050104; GO:0070403	R-MMU-5661270;	mmu:68631;	16.5565	16.3697	16.4364	16.5259	16.4781	16.8774	17.0348	16.9944	16.7494	16.8753
Lpl_P11152	-1.59839	-0.60795	-0.418101	-0.952913	-0.750503	1.18689	0.678178	1.40531	0.413009	0.644469	Lpl	Lipoprotein lipase	P11152	1.03207	4.52215e-05	0.00339312	-0.563127	sp|P11152|LIPL_MOUSE Lipoprotein lipase OS=Mus musculus OX=10090 GN=Lpl PE=1 SV=3	FUNCTION: Key enzyme in triglyceride metabolism. Catalyzes the hydrolysis of triglycerides from circulating chylomicrons and very low density lipoproteins (VLDL), and thereby plays an important role in lipid clearance from the blood stream, lipid utilization and storage (PubMed:8675619). Although it has both phospholipase and triglyceride lipase activities it is primarily a triglyceride lipase wi…	SUBCELLULAR LOCATION: Cell membrane {ECO:0000269|PubMed:20620994, ECO:0000269|PubMed:24726386, ECO:0000269|PubMed:27811232}; Peripheral membrane protein {ECO:0000269|PubMed:20620994, ECO:0000269|PubMed:24726386, ECO:0000269|PubMed:27811232}; Extracellular side {ECO:0000269|PubMed:20620994, ECO:0000269|PubMed:24726386, ECO:0000269|PubMed:27811232}. Secreted {ECO:0000269|PubMed:17403372, ECO:000026…		cellular response to fatty acid [GO:0071398]; cellular response to nutrient [GO:0031670]; cholesterol homeostasis [GO:0042632]; chylomicron remodeling [GO:0034371]; fatty acid biosynthetic process [GO:0006633]; fatty acid metabolic process [GO:0006631]; lipid catabolic process [GO:0016042]; low-density lipoprotein particle mediated signaling [GO:0055096]; negative regulation of cellular response …	1-acyl-2-lysophosphatidylserine acylhydrolase activity [GO:0052740]; apolipoprotein binding [GO:0034185]; calcium ion binding [GO:0005509]; heparan sulfate proteoglycan binding [GO:0043395]; heparin binding [GO:0008201]; lipase activity [GO:0016298]; lipoprotein lipase activity [GO:0004465]; lipoprotein particle binding [GO:0071813]; phosphatidylserine 1-acylhydrolase activity [GO:0052739]; phosp…	cell surface [GO:0009986]; chylomicron [GO:0042627]; extracellular space [GO:0005615]; plasma membrane [GO:0005886]; very-low-density lipoprotein particle [GO:0034361]	GO:0004465; GO:0004620; GO:0004806; GO:0005102; GO:0005509; GO:0005615; GO:0005886; GO:0006631; GO:0006633; GO:0008201; GO:0008970; GO:0009409; GO:0009617; GO:0009986; GO:0010744; GO:0010886; GO:0010890; GO:0016042; GO:0016298; GO:0017129; GO:0019432; GO:0019433; GO:0031670; GO:0032722; GO:0032731; GO:0032755; GO:0032760; GO:0034185; GO:0034361; GO:0034371; GO:0034372; GO:0042493; GO:0042627; GO:…	R-MMU-8963889;R-MMU-8963901;R-MMU-975634;	mmu:16956;	17.3219	17.6441	17.7059	17.5319	17.5977	18.228	18.0625	18.299	17.9762	18.0515
Pla2g16_Q8R3U1	-1.07118	-1.09562	-0.645455	-0.337532	-1.09848	0.231875	1.7326	1.02496	0.538746	0.720091	Pla2g16	HRAS-like suppressor 3	Q8R3U1	1.06524	4.54993e-05	0.00339312	-0.994677	sp|Q8R3U1|PA216_MOUSE HRAS-like suppressor 3 OS=Mus musculus OX=10090 GN=Pla2g16 PE=1 SV=2	FUNCTION: Exhibits both phospholipase A1/2 and acyltransferase activities (PubMed:19047760). Shows phospholipase A1 (PLA1) and A2 (PLA2), catalyzing the calcium-independent release of fatty acids from the sn-1 or sn-2 position of glycerophospholipids (PubMed:18614531, PubMed:19047760, PubMed:19136964, PubMed:22134920). For most substrates, PLA1 activity is much higher than PLA2 activity (By simil…	SUBCELLULAR LOCATION: Cell membrane {ECO:0000250|UniProtKB:P53817}; Single-pass membrane protein {ECO:0000255}. Cytoplasm {ECO:0000269|PubMed:18614531}. Cytoplasm, perinuclear region {ECO:0000269|PubMed:18614531}. Peroxisome membrane {ECO:0000269|PubMed:22134920}.		ether lipid metabolic process [GO:0046485]; lipid catabolic process [GO:0016042]; N-acylphosphatidylethanolamine metabolic process [GO:0070292]; negative regulation of cell cycle [GO:0045786]; peroxisome organization [GO:0007031]; phospholipid biosynthetic process [GO:0008654]; phospholipid metabolic process [GO:0006644]; regulation of adipose tissue development [GO:1904177]; response to bacteriu…	1-acyl-2-lysophosphatidylserine acylhydrolase activity [GO:0052740]; N-acyltransferase activity [GO:0016410]; phosphatidylserine 1-acylhydrolase activity [GO:0052739]; phospholipase A1 activity [GO:0008970]; phospholipase A2 activity [GO:0004623]; phospholipase A2 activity (consuming 1,2-dipalmitoylphosphatidylcholine) [GO:0102567]; phospholipase A2 activity consuming 1,2-dioleoylphosphatidyletha…	cytoplasm [GO:0005737]; endoplasmic reticulum [GO:0005783]; integral component of membrane [GO:0016021]; membrane [GO:0016020]; perinuclear region of cytoplasm [GO:0048471]; peroxisomal membrane [GO:0005778]; peroxisome [GO:0005777]; plasma membrane [GO:0005886]	GO:0004623; GO:0005737; GO:0005777; GO:0005778; GO:0005783; GO:0005886; GO:0006641; GO:0006644; GO:0007031; GO:0008654; GO:0008970; GO:0009617; GO:0016020; GO:0016021; GO:0016042; GO:0016410; GO:0045786; GO:0046485; GO:0048471; GO:0052739; GO:0052740; GO:0070292; GO:0102567; GO:0102568; GO:1904177	R-MMU-1482788;R-MMU-1482801;R-MMU-1482839;R-MMU-1482922;	mmu:225845;	15.1162	15.1019	15.3654	15.5457	15.1003	15.879	16.7574	16.3432	16.0586	16.1647
Saa3_P04918	1.39567	1.15714	0.785885	1.04441	-0.114887	-0.984487	-0.549548	-0.526853	-1.16097	-1.04637	Saa3	Serum amyloid A-3 protein	P04918	1.05151	4.73839e-05	0.00339312	0.771547	sp|P04918|SAA3_MOUSE Serum amyloid A-3 protein OS=Mus musculus OX=10090 GN=Saa3 PE=1 SV=1	FUNCTION: Major acute phase reactant. Apolipoprotein of the HDL complex.	SUBCELLULAR LOCATION: Secreted {ECO:0000250}.		acute-phase response [GO:0006953]; cell chemotaxis [GO:0060326]; cellular response to interleukin-1 [GO:0071347]; I-kappaB phosphorylation [GO:0007252]; response to bacterium [GO:0009617]; response to stilbenoid [GO:0035634]	chemoattractant activity [GO:0042056]; Toll-like receptor 4 binding [GO:0035662]	extracellular space [GO:0005615]; high-density lipoprotein particle [GO:0034364]	GO:0005615; GO:0006953; GO:0007252; GO:0009617; GO:0034364; GO:0035634; GO:0035662; GO:0042056; GO:0060326; GO:0071347		mmu:20210;	15.9937	15.8859	15.7181	15.8349	15.311	14.9181	15.1146	15.1249	14.8383	14.8901
Prkaca_P05132	-0.773371	-0.9599	-1.27803	-1.03592	-0.408925	1.43207	0.511944	1.19062	0.621419	0.700098	Prkaca	cAMP-dependent protein kinase catalytic subunit alpha	P05132	1.02164	4.76719e-05	0.00339312	-0.390846	sp|P05132|KAPCA_MOUSE cAMP-dependent protein kinase catalytic subunit alpha OS=Mus musculus OX=10090 GN=Prkaca PE=1 SV=3	FUNCTION: Phosphorylates a large number of substrates in the cytoplasm and the nucleus (By similarity). Phosphorylates CDC25B, ABL1, NFKB1, CLDN3, PSMC5/RPT6, PJA2, RYR2, RORA, SOX9 and VASP (PubMed:10805756, PubMed:19223768). Regulates the abundance of compartmentalized pools of its regulatory subunits through phosphorylation of PJA2 which binds and ubiquitinates these subunits, leading to their…	SUBCELLULAR LOCATION: Cytoplasm {ECO:0000269|PubMed:18367160}. Cell membrane {ECO:0000250}. Nucleus {ECO:0000250}. Mitochondrion {ECO:0000269|PubMed:18367160}. Membrane {ECO:0000250|UniProtKB:P17612}; Lipid-anchor {ECO:0000250|UniProtKB:P17612}. Note=Translocates into the nucleus (monomeric catalytic subunit) (By similarity). The inactive holoenzyme is found in the cytoplasm. Distributed througho…		cellular response to glucose stimulus [GO:0071333]; cellular response to heat [GO:0034605]; cellular response to parathyroid hormone stimulus [GO:0071374]; mesoderm formation [GO:0001707]; modulation of chemical synaptic transmission [GO:0050804]; mRNA processing [GO:0006397]; negative regulation of meiotic cell cycle [GO:0051447]; negative regulation of smoothened signaling pathway involved in d…	AMP-activated protein kinase activity [GO:0004679]; ATP binding [GO:0005524]; cAMP-dependent protein kinase activity [GO:0004691]; magnesium ion binding [GO:0000287]; manganese ion binding [GO:0030145]; protein-containing complex binding [GO:0044877]; protein domain specific binding [GO:0019904]; protein kinase activity [GO:0004672]; protein kinase A regulatory subunit binding [GO:0034237]; prote…	acrosomal vesicle [GO:0001669]; axoneme [GO:0005930]; cAMP-dependent protein kinase complex [GO:0005952]; centrosome [GO:0005813]; ciliary base [GO:0097546]; cytoplasm [GO:0005737]; cytosol [GO:0005829]; dendritic spine [GO:0043197]; Golgi apparatus [GO:0005794]; intercellular bridge [GO:0045171]; membrane [GO:0016020]; mitochondrion [GO:0005739]; neuromuscular junction [GO:0031594]; neuron proje…	GO:0000287; GO:0001669; GO:0001707; GO:0001843; GO:0004672; GO:0004674; GO:0004679; GO:0004691; GO:0004712; GO:0005524; GO:0005634; GO:0005654; GO:0005737; GO:0005739; GO:0005794; GO:0005813; GO:0005829; GO:0005886; GO:0005930; GO:0005952; GO:0006397; GO:0006468; GO:0008284; GO:0010737; GO:0016020; GO:0016607; GO:0017137; GO:0018105; GO:0018107; GO:0019901; GO:0019904; GO:0030145; GO:0031588; GO:…	R-MMU-163615;R-MMU-164378;R-MMU-180024;R-MMU-2565942;R-MMU-380259;R-MMU-380270;R-MMU-380284;R-MMU-380320;R-MMU-381676;R-MMU-392517;R-MMU-422356;R-MMU-432040;R-MMU-4420097;R-MMU-442720;R-MMU-512988;R-MMU-5578775;R-MMU-5610785;R-MMU-5610787;R-MMU-5620912;R-MMU-5621575;R-MMU-5687128;R-MMU-8853659;R-MMU-8854518;R-MMU-8963896;R-MMU-983231;	mmu:18747;	18.0848	18.0439	17.9741	18.0272	18.1647	18.5684	18.3666	18.5154	18.3906	18.4079
Lama2_Q60675	-0.792886	-0.75567	-0.673578	-1.10117	-1.12322	1.31786	1.05761	1.00094	0.0646158	1.00551	Lama2	Laminin subunit alpha-2	Q60675	1.0207	4.81957e-05	0.00339312	-0.397014	sp|Q60675|LAMA2_MOUSE Laminin subunit alpha-2 OS=Mus musculus OX=10090 GN=Lama2 PE=1 SV=2	FUNCTION: Binding to cells via a high affinity receptor, laminin is thought to mediate the attachment, migration and organization of cells into tissues during embryonic development by interacting with other extracellular matrix components.	SUBCELLULAR LOCATION: Secreted, extracellular space, extracellular matrix, basement membrane. Note=Major component.	DISEASE: Note=Defects in Lama2 are a cause of murine muscular dystrophy (dy2J).	animal organ morphogenesis [GO:0009887]; axon guidance [GO:0007411]; cell adhesion [GO:0007155]; positive regulation of synaptic transmission, cholinergic [GO:0032224]; regulation of cell adhesion [GO:0030155]; regulation of cell migration [GO:0030334]; regulation of embryonic development [GO:0045995]; Schwann cell differentiation [GO:0014037]; tissue development [GO:0009888]	extracellular matrix structural constituent [GO:0005201]; signaling receptor binding [GO:0005102]	basement membrane [GO:0005604]; collagen-containing extracellular matrix [GO:0062023]; dendritic spine [GO:0043197]; extracellular region [GO:0005576]; neuromuscular junction [GO:0031594]; sarcolemma [GO:0042383]; synaptic cleft [GO:0043083]	GO:0005102; GO:0005201; GO:0005576; GO:0005604; GO:0007155; GO:0007411; GO:0009887; GO:0009888; GO:0014037; GO:0030155; GO:0030334; GO:0031594; GO:0032224; GO:0042383; GO:0043083; GO:0043197; GO:0045995; GO:0062023	R-MMU-3000157;R-MMU-8874081;	mmu:16773;	19.1969	19.2052	19.2236	19.1281	19.1232	19.6681	19.61	19.5973	19.3883	19.5984
Pdhb_Q9D051	-0.596074	-0.479534	-0.774469	-1.23093	-1.3306	1.1538	1.18895	1.15295	0.591497	0.324404	Pdhb	Pyruvate dehydrogenase E1 component subunit beta, mitochondrial	Q9D051	1.02363	4.84617e-05	0.00339312	-0.426394	sp|Q9D051|ODPB_MOUSE Pyruvate dehydrogenase E1 component subunit beta, mitochondrial OS=Mus musculus OX=10090 GN=Pdhb PE=1 SV=1	FUNCTION: The pyruvate dehydrogenase complex catalyzes the overall conversion of pyruvate to acetyl-CoA and CO(2), and thereby links the glycolytic pathway to the tricarboxylic cycle. {ECO:0000250}.	SUBCELLULAR LOCATION: Mitochondrion matrix {ECO:0000250}.		acetyl-CoA biosynthetic process from pyruvate [GO:0006086]; glucose metabolic process [GO:0006006]; mitochondrial acetyl-CoA biosynthetic process from pyruvate [GO:0061732]; tricarboxylic acid cycle [GO:0006099]	pyruvate dehydrogenase (acetyl-transferring) activity [GO:0004739]; pyruvate dehydrogenase (NAD+) activity [GO:0034604]	mitochondrial pyruvate dehydrogenase complex [GO:0005967]; mitochondrion [GO:0005739]; nucleoplasm [GO:0005654]; pyruvate dehydrogenase complex [GO:0045254]	GO:0004739; GO:0005654; GO:0005739; GO:0005967; GO:0006006; GO:0006086; GO:0006099; GO:0034604; GO:0045254; GO:0061732	R-MMU-204174;R-MMU-389661;R-MMU-5362517;R-MMU-70268;	mmu:68263;	18.1137	18.1419	18.0706	17.9603	17.9362	18.5366	18.5451	18.5364	18.4007	18.3362
Erc1_Q99MI1	-0.88776	-0.62472	-1.06036	-1.22053	-0.575025	0.850576	1.16504	1.57716	0.325071	0.450558	Erc1	ELKS/Rab6-interacting/CAST family member 1	Q99MI1	1.03143	4.87287e-05	0.00339312	-0.475471	sp|Q99MI1|RB6I2_MOUSE ELKS/Rab6-interacting/CAST family member 1 OS=Mus musculus OX=10090 GN=Erc1 PE=1 SV=1	FUNCTION: Regulatory subunit of the IKK complex. Probably recruits IkappaBalpha/NFKBIA to the complex (By similarity). May be involved in the organization of the cytomatrix at the nerve terminals active zone (CAZ) which regulates neurotransmitter release. May be involved in vesicle trafficking at the CAZ. May be involved in Rab-6 regulated endosomes to Golgi transport. {ECO:0000250}.	SUBCELLULAR LOCATION: Cytoplasm, cytoskeleton, microtubule organizing center, centrosome {ECO:0000250|UniProtKB:Q8IUD2}. Cytoplasm. Membrane; Peripheral membrane protein. Golgi apparatus membrane; Peripheral membrane protein. Cell junction, synapse, presynaptic active zone {ECO:0000269|PubMed:14723704}. Note=Recruited on Golgi membranes by RAB6A in a GTP-dependent manner.		I-kappaB phosphorylation [GO:0007252]; protein transport [GO:0015031]; retrograde transport, endosome to Golgi [GO:0042147]; synaptic vesicle priming [GO:0016082]	PDZ domain binding [GO:0030165]; Rab GTPase binding [GO:0017137]; structural constituent of presynaptic active zone [GO:0098882]; voltage-gated calcium channel activity involved in positive regulation of presynaptic cytosolic calcium levels [GO:0099635]	centrosome [GO:0005813]; ciliary basal body [GO:0036064]; cytoplasm [GO:0005737]; GABA-ergic synapse [GO:0098982]; glutamatergic synapse [GO:0098978]; Golgi membrane [GO:0000139]; IkappaB kinase complex [GO:0008385]; membrane [GO:0016020]; postsynaptic density [GO:0014069]; presynaptic active zone [GO:0048786]; synapse [GO:0045202]; synaptic vesicle [GO:0008021]	GO:0000139; GO:0005737; GO:0005813; GO:0007252; GO:0008021; GO:0008385; GO:0014069; GO:0015031; GO:0016020; GO:0016082; GO:0017137; GO:0030165; GO:0036064; GO:0042147; GO:0045202; GO:0048786; GO:0098882; GO:0098978; GO:0098982; GO:0099635		mmu:111173;	15.1229	15.1945	15.0759	15.0324	15.208	15.5959	15.6815	15.7936	15.4529	15.4871
Akr1b7_P21300	-0.428447	-0.661736	-0.489758	-1.4869	-1.2203	1.41431	0.941018	0.921197	0.19418	0.816437	Akr1b7	Aldose reductase-related protein 1	P21300	1.04497	4.89344e-05	0.00339312	-0.660785	sp|P21300|ALD1_MOUSE Aldose reductase-related protein 1 OS=Mus musculus OX=10090 GN=Akr1b7 PE=1 SV=4	FUNCTION: Reduces a broad range of aliphatic and aromatic aldehydes to the corresponding alcohols. Reduces prostaglandins (PubMed:19010934). May play a role in the metabolism of xenobiotic aromatic aldehydes (By similarity). {ECO:0000250, ECO:0000269|PubMed:19010934}.	SUBCELLULAR LOCATION: Cytoplasm {ECO:0000250}.		cellular lipid metabolic process [GO:0044255]	alcohol dehydrogenase (NADP+) activity [GO:0008106]; alditol:NADP+ 1-oxidoreductase activity [GO:0004032]; oxidoreductase activity [GO:0016491]	cytosol [GO:0005829]; mitochondrion [GO:0005739]	GO:0004032; GO:0005739; GO:0005829; GO:0008106; GO:0016491; GO:0044255	R-MMU-193144;	mmu:11997;	14.8588	14.7689	14.8352	14.451	14.5537	15.5689	15.3865	15.3789	15.0987	15.3385
Cpt2_P52825	-0.879351	-0.860182	-0.690334	-1.39465	-0.640684	1.28411	0.974498	0.801347	1.16449	0.240752	Cpt2	Carnitine O-palmitoyltransferase 2, mitochondrial	P52825	1.02118	4.89683e-05	0.00339312	-0.382302	sp|P52825|CPT2_MOUSE Carnitine O-palmitoyltransferase 2, mitochondrial OS=Mus musculus OX=10090 GN=Cpt2 PE=1 SV=2	FUNCTION: Involved in the intramitochondrial synthesis of acylcarnitines from accumulated acyl-CoA metabolites. Reconverts acylcarnitines back into the respective acyl-CoA esters that can then undergo beta-oxidation, an essential step for the mitochondrial uptake of long-chain fatty acids and their subsequent beta-oxidation in the mitochondrion. Active with medium (C8-C12) and long-chain (C14-C18…	SUBCELLULAR LOCATION: Mitochondrion inner membrane {ECO:0000250}; Peripheral membrane protein {ECO:0000250}; Matrix side {ECO:0000250}.		carnitine metabolic process [GO:0009437]; fatty acid beta-oxidation [GO:0006635]; in utero embryonic development [GO:0001701]; long-chain fatty acid metabolic process [GO:0001676]; positive regulation of cold-induced thermogenesis [GO:0120162]	carnitine O-palmitoyltransferase activity [GO:0004095]; transferase activity, transferring acyl groups [GO:0016746]	mitochondrial inner membrane [GO:0005743]; mitochondrion [GO:0005739]; nucleolus [GO:0005730]; nucleoplasm [GO:0005654]	GO:0001676; GO:0001701; GO:0004095; GO:0005654; GO:0005730; GO:0005739; GO:0005743; GO:0006635; GO:0009437; GO:0016746; GO:0120162	R-MMU-200425;	mmu:12896;	18.0518	18.0559	18.0922	17.9415	18.1028	18.5148	18.4486	18.4115	18.4892	18.2915
Tmem245_B1AZA5	-0.482624	-0.65806	-0.880795	-1.32792	-0.958894	1.44444	0.769015	1.07523	-0.000908766	1.02053	Tmem245	Transmembrane protein 245	B1AZA5	1.03895	4.92907e-05	0.00339312	-0.589097	sp|B1AZA5|TM245_MOUSE Transmembrane protein 245 OS=Mus musculus OX=10090 GN=Tmem245 PE=1 SV=1		SUBCELLULAR LOCATION: Membrane {ECO:0000305}; Multi-pass membrane protein {ECO:0000305}.				integral component of membrane [GO:0016021]	GO:0016021			15.2543	15.1944	15.1182	14.9654	15.0915	15.9131	15.6822	15.7869	15.419	15.7682
Rnf141_Q99MB7	-0.840404	-1.53526	-1.2036	-0.260595	-0.412523	0.463417	0.945056	1.48736	0.747983	0.608567	Rnf141	RING finger protein 141	Q99MB7	1.06123	4.98194e-05	0.00339312	-0.849142	sp|Q99MB7|RN141_MOUSE RING finger protein 141 OS=Mus musculus OX=10090 GN=Rnf141 PE=1 SV=2	FUNCTION: May be involved in spermatogenesis. {ECO:0000269|PubMed:12804569}.	SUBCELLULAR LOCATION: Membrane {ECO:0000250|UniProtKB:Q8WVD5}; Lipid-anchor {ECO:0000250|UniProtKB:Q8WVD5}.		protein autoubiquitination [GO:0051865]; regulation of transcription, DNA-templated [GO:0006355]	metal ion binding [GO:0046872]; ubiquitin-protein transferase activity [GO:0004842]	membrane [GO:0016020]	GO:0004842; GO:0006355; GO:0016020; GO:0046872; GO:0051865		mmu:67150;	13.8732	13.5263	13.6918	14.1626	14.0868	14.524	14.7645	15.0352	14.6661	14.5965
Mia2_Q91ZV0	-0.788877	-1.13919	-0.775993	-0.987233	-0.813161	1.03026	1.18091	1.33031	0.20532	0.757652	Mia2	Melanoma inhibitory activity protein 2	Q91ZV0	1.02264	4.98879e-05	0.00339312	-0.357431	sp|Q91ZV0|MIA2_MOUSE Melanoma inhibitory activity protein 2 OS=Mus musculus OX=10090 GN=Mia2 PE=1 SV=3	FUNCTION: Plays a role in the transport of cargos that are too large to fit into COPII-coated vesicles and require specific mechanisms to be incorporated into membrane-bound carriers and exported from the endoplasmic reticulum. Plays a role in the secretion of lipoproteins, pre-chylomicrons and pre-VLDLs, by participating in their export from the endoplasmic reticulum (By similarity). Thereby, ma…	SUBCELLULAR LOCATION: Endoplasmic reticulum membrane {ECO:0000269|PubMed:21807889}; Single-pass membrane protein {ECO:0000305|PubMed:21807889}. Note=Localizes to endoplasmic reticulum exit sites (ERES), also known as transitional endoplasmic reticulum (tER). {ECO:0000269|PubMed:21807889}.		cholesterol homeostasis [GO:0042632]; endoplasmic reticulum to Golgi vesicle-mediated transport [GO:0006888]; lipoprotein transport [GO:0042953]; protein exit from endoplasmic reticulum [GO:0032527]; protein localization to endoplasmic reticulum exit site [GO:0070973]; protein secretion [GO:0009306]; triglyceride homeostasis [GO:0070328]; vesicle cargo loading [GO:0035459]	cargo receptor activity [GO:0038024]	endoplasmic reticulum exit site [GO:0070971]; endoplasmic reticulum membrane [GO:0005789]; integral component of membrane [GO:0016021]	GO:0005789; GO:0006888; GO:0009306; GO:0016021; GO:0032527; GO:0035459; GO:0038024; GO:0042632; GO:0042953; GO:0070328; GO:0070971; GO:0070973	R-MMU-5694530;		15.8064	15.7369	15.809	15.7671	15.8016	16.1673	16.1972	16.2268	16.0037	16.1132
_P01864	-1.05323	-0.540518	-1.37003	-1.29907	0.00617753	1.15724	0.448774	0.772464	1.19678	0.681426		Ig gamma-2A chain C region secreted form	P01864	1.04296	5.08066e-05	0.00339312	-0.799689	sp|P01864|GCAB_MOUSE Ig gamma-2A chain C region secreted form OS=Mus musculus OX=10090 PE=1 SV=1		SUBCELLULAR LOCATION: [Isoform Secreted]: Secreted {ECO:0000305}.				extracellular region [GO:0005576]	GO:0005576			18.5207	18.7615	18.3719	18.4052	19.0183	19.5589	19.2261	19.3782	19.5775	19.3354
Arhgap18_Q8K0Q5	-0.845451	-1.00654	-0.670973	-1.21795	-0.851613	0.80914	1.477	0.719159	0.783995	0.803222	Arhgap18	Rho GTPase-activating protein 18	Q8K0Q5	1.01942	5.13981e-05	0.00339312	-0.317537	sp|Q8K0Q5|RHG18_MOUSE Rho GTPase-activating protein 18 OS=Mus musculus OX=10090 GN=Arhgap18 PE=1 SV=1	FUNCTION: Rho GTPase activating protein that suppresses F-actin polymerization by inhibiting Rho. Rho GTPase activating proteins act by converting Rho-type GTPases to an inactive GDP-bound state. Plays a key role in tissue tension and 3D tissue shape by regulating cortical actomyosin network formation. Acts downstream of YAP1 and inhibits actin polymerization, which in turn reduces nuclear locali…	SUBCELLULAR LOCATION: Cytoplasm {ECO:0000250|UniProtKB:Q8N392}.		regulation of actin cytoskeleton organization [GO:0032956]; regulation of actin filament polymerization [GO:0030833]; regulation of cell motility [GO:2000145]; regulation of cell shape [GO:0008360]; regulation of small GTPase mediated signal transduction [GO:0051056]; small GTPase mediated signal transduction [GO:0007264]	GTPase activator activity [GO:0005096]	cytoplasm [GO:0005737]; cytoplasmic microtubule [GO:0005881]; cytosol [GO:0005829]; nuclear speck [GO:0016607]; plasma membrane [GO:0005886]; ruffle [GO:0001726]	GO:0001726; GO:0005096; GO:0005737; GO:0005829; GO:0005881; GO:0005886; GO:0007264; GO:0008360; GO:0016607; GO:0030833; GO:0032956; GO:0051056; GO:2000145	R-MMU-194840;	mmu:73910;	16.3674	16.3395	16.3975	16.303	16.3663	16.6534	16.7688	16.6378	16.649	16.6523
Mad1l1_Q9WTX8	-0.378543	-0.985705	-0.63493	-1.16515	-1.19	0.944673	0.451649	1.6628	0.711595	0.583621	Mad1l1	Mitotic spindle assembly checkpoint protein MAD1	Q9WTX8	1.03716	5.14213e-05	0.00339312	-0.486921	sp|Q9WTX8|MD1L1_MOUSE Mitotic spindle assembly checkpoint protein MAD1 OS=Mus musculus OX=10090 GN=Mad1l1 PE=1 SV=1	FUNCTION: Component of the spindle-assembly checkpoint that prevents the onset of anaphase until all chromosomes are properly aligned at the metaphase plate (By similarity). Forms a heterotetrameric complex with the closed conformation form of MAD2L1 (C-MAD2) at unattached kinetochores during prometaphase, recruits an open conformation of MAD2L1 (O-MAD2) and promotes the conversion of O-MAD2 to C…	SUBCELLULAR LOCATION: Nucleus {ECO:0000250}. Chromosome, centromere, kinetochore {ECO:0000250|UniProtKB:Q9Y6D9}. Nucleus envelope {ECO:0000250|UniProtKB:Q9Y6D9}. Cytoplasm, cytoskeleton, microtubule organizing center, centrosome {ECO:0000250}. Cytoplasm, cytoskeleton, spindle {ECO:0000250}. Cytoplasm, cytoskeleton, spindle pole {ECO:0000250|UniProtKB:Q9Y6D9}. Note=Detected at the nucleus envelope…		attachment of mitotic spindle microtubules to kinetochore [GO:0051315]; cell division [GO:0051301]; mitotic spindle assembly checkpoint [GO:0007094]; negative regulation of T cell proliferation [GO:0042130]; regulation of metaphase plate congression [GO:0090235]; regulation of mitotic cell cycle phase transition [GO:1901990]; thymus development [GO:0048538]	identical protein binding [GO:0042802]; kinetochore binding [GO:0043515]	condensed chromosome kinetochore [GO:0000777]; cytoplasm [GO:0005737]; kinetochore [GO:0000776]; microtubule organizing center [GO:0005815]; mitotic spindle [GO:0072686]; mitotic spindle pole [GO:0097431]; nuclear envelope [GO:0005635]; nuclear pore nuclear basket [GO:0044615]; spindle pole [GO:0000922]	GO:0000776; GO:0000777; GO:0000922; GO:0005635; GO:0005737; GO:0005815; GO:0007094; GO:0042130; GO:0042802; GO:0043515; GO:0044615; GO:0048538; GO:0051301; GO:0051315; GO:0072686; GO:0090235; GO:0097431; GO:1901990	R-MMU-141444;R-MMU-2467813;R-MMU-2500257;R-MMU-5663220;R-MMU-68877;R-MMU-9648025;	mmu:17120;	13.2411	13.0713	13.1694	13.0211	13.0142	13.611	13.4731	13.8117	13.5458	13.51
Hadh_Q61425	-0.904359	-0.797357	-0.730495	-1.41054	-0.596883	1.29269	0.651946	1.24196	0.975259	0.277776	Hadh	Hydroxyacyl-coenzyme A dehydrogenase, mitochondrial	Q61425	1.02178	5.29296e-05	0.00344669	-0.39373	sp|Q61425|HCDH_MOUSE Hydroxyacyl-coenzyme A dehydrogenase, mitochondrial OS=Mus musculus OX=10090 GN=Hadh PE=1 SV=2	FUNCTION: Mitochondrial fatty acid beta-oxidation enzyme that catalyzes the third step of the beta-oxidation cycle for medium and short-chain 3-hydroxy fatty acyl-CoAs (C4 to C10) (By similarity). Plays a role in the control of insulin secretion by inhibiting the activation of glutamate dehydrogenase 1 (GLUD1), an enzyme that has an important role in regulating amino acid-induced insulin secretio…	SUBCELLULAR LOCATION: Mitochondrion matrix {ECO:0000250|UniProtKB:P00348}.		fatty acid beta-oxidation [GO:0006635]; negative regulation of insulin secretion [GO:0046676]; positive regulation of cold-induced thermogenesis [GO:0120162]; regulation of insulin secretion [GO:0050796]; response to activity [GO:0014823]; response to drug [GO:0042493]; response to insulin [GO:0032868]	3-hydroxyacyl-CoA dehydrogenase activity [GO:0003857]; identical protein binding [GO:0042802]; NAD+ binding [GO:0070403]	cytoplasm [GO:0005737]; mitochondrial inner membrane [GO:0005743]; mitochondrial matrix [GO:0005759]; mitochondrion [GO:0005739]; nucleoplasm [GO:0005654]	GO:0003857; GO:0005654; GO:0005737; GO:0005739; GO:0005743; GO:0005759; GO:0006635; GO:0014823; GO:0032868; GO:0042493; GO:0042802; GO:0046676; GO:0050796; GO:0070403; GO:0120162	R-MMU-77310;R-MMU-77346;R-MMU-77348;R-MMU-77350;R-MMU-77352;	mmu:15107;	18.0752	18.099	18.1138	17.963	18.1434	18.5624	18.4203	18.5511	18.492	18.3373
Ikbkap_Q7TT37	-0.866472	-1.07792	-1.08933	-0.330305	-1.0311	1.19271	0.785553	1.33398	0.943266	0.139624	Ikbkap	Elongator complex protein 1	Q7TT37	1.0283	5.38369e-05	0.00346024	-0.430474	sp|Q7TT37|ELP1_MOUSE Elongator complex protein 1 OS=Mus musculus OX=10090 GN=Elp1 PE=1 SV=2	FUNCTION: Component of the RNA polymerase II elongator complex, a multiprotein complex associated with the RNA polymerase II (Pol II) holoenzyme, and which is involved in transcriptional elongation. The elongator complex catalyzes formation of carboxymethyluridine in the wobble base at position 34 in tRNAs (By similarity). Involved in neurogenesis (PubMed:22854966). Regulates the migration and br…	SUBCELLULAR LOCATION: Cytoplasm {ECO:0000269|PubMed:19185337}. Nucleus {ECO:0000250|UniProtKB:O95163}.		I-kappaB phosphorylation [GO:0007252]; tRNA wobble base 5-methoxycarbonylmethyl-2-thiouridinylation [GO:0002926]	ATP binding [GO:0005524]; protein kinase activity [GO:0004672]; tRNA binding [GO:0000049]	cytoplasm [GO:0005737]; cytosol [GO:0005829]; Elongator holoenzyme complex [GO:0033588]; nucleus [GO:0005634]	GO:0000049; GO:0002926; GO:0004672; GO:0005524; GO:0005634; GO:0005737; GO:0005829; GO:0007252; GO:0033588		mmu:230233;	15.2151	15.1633	15.1605	15.3464	15.1748	15.7193	15.6196	15.7539	15.6582	15.4614
Acads_Q07417	-0.581638	-0.891377	-0.952254	-1.35587	-0.665608	1.33453	0.797143	0.941398	1.15202	0.221651	Acads	Short-chain specific acyl-CoA dehydrogenase, mitochondrial	Q07417	1.02137	5.4851e-05	0.00348022	-0.385457	sp|Q07417|ACADS_MOUSE Short-chain specific acyl-CoA dehydrogenase, mitochondrial OS=Mus musculus OX=10090 GN=Acads PE=1 SV=2	FUNCTION: Short-chain specific acyl-CoA dehydrogenase is one of the acyl-CoA dehydrogenases that catalyze the first step of mitochondrial fatty acid beta-oxidation, an aerobic process breaking down fatty acids into acetyl-CoA and allowing the production of energy from fats. The first step of fatty acid beta-oxidation consists in the removal of one hydrogen from C-2 and C-3 of the straight-chain f…	SUBCELLULAR LOCATION: Mitochondrion matrix {ECO:0000250|UniProtKB:Q3ZBF6}.		butyrate catabolic process [GO:0046359]; fatty acid beta-oxidation using acyl-CoA dehydrogenase [GO:0033539]	acyl-CoA dehydrogenase activity [GO:0003995]; butyryl-CoA dehydrogenase activity [GO:0004085]; fatty-acyl-CoA binding [GO:0000062]; flavin adenine dinucleotide binding [GO:0050660]; identical protein binding [GO:0042802]	centrosome [GO:0005813]; mitochondrial matrix [GO:0005759]; mitochondrial membrane [GO:0031966]; mitochondrion [GO:0005739]; nucleoplasm [GO:0005654]	GO:0000062; GO:0003995; GO:0004085; GO:0005654; GO:0005739; GO:0005759; GO:0005813; GO:0031966; GO:0033539; GO:0042802; GO:0046359; GO:0050660	R-MMU-77350;R-MMU-77352;	mmu:11409;	18.1062	18.0391	18.0259	17.9384	18.088	18.5215	18.405	18.4363	18.4819	18.2803
Pcolce_Q61398	-0.692128	-0.968327	-0.642529	-0.685979	-1.34756	0.846403	1.06119	1.62034	0.615304	0.193279	Pcolce	Procollagen C-endopeptidase enhancer 1	Q61398	1.03347	5.56566e-05	0.00348664	-0.500712	sp|Q61398|PCOC1_MOUSE Procollagen C-endopeptidase enhancer 1 OS=Mus musculus OX=10090 GN=Pcolce PE=1 SV=2	FUNCTION: Binds to the C-terminal propeptide of type I procollagen and enhances procollagen C-proteinase activity.	SUBCELLULAR LOCATION: Secreted.		cellular response to leukemia inhibitory factor [GO:1990830]; proteolysis [GO:0006508]	collagen binding [GO:0005518]; heparin binding [GO:0008201]; peptidase activator activity [GO:0016504]	extracellular space [GO:0005615]	GO:0005518; GO:0005615; GO:0006508; GO:0008201; GO:0016504; GO:1990830	R-MMU-1650814;R-MMU-2243919;	mmu:18542;	15.0089	14.9291	15.0232	15.0106	14.8197	15.453	15.515	15.6764	15.3863	15.2644
Cnst_Q8CBC4	-1.35179	-0.878574	-0.216241	-1.17094	-0.669553	1.24133	1.0428	1.18277	0.117713	0.702486	Cnst	Consortin	Q8CBC4	1.05499	5.71207e-05	0.00351137	-0.603272	sp|Q8CBC4|CNST_MOUSE Consortin OS=Mus musculus OX=10090 GN=Cnst PE=1 SV=1	FUNCTION: Required for targeting of connexins to the plasma membrane. {ECO:0000250}.	SUBCELLULAR LOCATION: Cell membrane {ECO:0000250}; Single-pass membrane protein {ECO:0000250}. Golgi apparatus, trans-Golgi network membrane {ECO:0000250}; Single-pass membrane protein {ECO:0000250}. Cytoplasmic vesicle, secretory vesicle {ECO:0000250}. Note=Located predominantly in the trans-Golgi network. Probably trafficks between the trans-Golgi network and the cell membrane via the secretory…		negative regulation of phosphatase activity [GO:0010923]; positive regulation of Golgi to plasma membrane protein transport [GO:0042998]	connexin binding [GO:0071253]; phosphatase binding [GO:0019902]	integral component of membrane [GO:0016021]; intracellular membrane-bounded organelle [GO:0043231]; plasma membrane [GO:0005886]; protein-containing complex [GO:0032991]; trans-Golgi network [GO:0005802]; transport vesicle [GO:0030133]	GO:0005802; GO:0005886; GO:0010923; GO:0016021; GO:0019902; GO:0030133; GO:0032991; GO:0042998; GO:0043231; GO:0071253		mmu:226744;	10.7964	10.9628	11.1958	10.86	11.0364	11.7086	11.6388	11.688	11.3133	11.519
Acss3_Q14DH7	-0.824815	-0.946135	-1.05156	-1.22354	-0.349837	1.091	1.10887	1.30979	0.735665	0.150562	Acss3	Acyl-CoA synthetase short-chain family member 3, mitochondrial	Q14DH7	1.02587	5.74705e-05	0.00351137	-0.422132	sp|Q14DH7|ACSS3_MOUSE Acyl-CoA synthetase short-chain family member 3, mitochondrial OS=Mus musculus OX=10090 GN=Acss3 PE=1 SV=2	FUNCTION: Catalyzes the synthesis of acetyl-CoA from short-chain fatty acids (By similarity). Propionate is the preferred substrate but can also utilize acetate and butyrate with a much lower affinity (By similarity). {ECO:0000250|UniProtKB:A0A0G2K047}.	SUBCELLULAR LOCATION: Mitochondrion matrix {ECO:0000250|UniProtKB:A0A0G2K047}.			acetate-CoA ligase activity [GO:0003987]; ATP binding [GO:0005524]; butyrate-CoA ligase activity [GO:0047760]; propionate-CoA ligase activity [GO:0050218]	mitochondrial matrix [GO:0005759]; mitochondrion [GO:0005739]	GO:0003987; GO:0005524; GO:0005739; GO:0005759; GO:0047760; GO:0050218	R-MMU-77111;	mmu:380660;	16.3326	16.3035	16.2781	16.2369	16.4466	16.7925	16.7968	16.845	16.7072	16.5667
Relb_Q04863	-0.460555	-1.23804	-0.071124	-1.13178	-1.32866	0.727674	0.656318	0.539893	1.53566	0.770606	Relb	Transcription factor RelB	Q04863	1.06039	5.91673e-05	0.00357096	-0.884886	sp|Q04863|RELB_MOUSE Transcription factor RelB OS=Mus musculus OX=10090 GN=Relb PE=1 SV=2	FUNCTION: NF-kappa-B is a pleiotropic transcription factor which is present in almost all cell types and is involved in many biological processed such as inflammation, immunity, differentiation, cell growth, tumorigenesis and apoptosis. NF-kappa-B is a homo- or heterodimeric complex formed by the Rel-like domain-containing proteins RELA/p65, RELB, NFKB1/p105, NFKB1/p50, REL and NFKB2/p52. The dim…	SUBCELLULAR LOCATION: Nucleus. Cytoplasm, cytoskeleton, microtubule organizing center, centrosome {ECO:0000250}. Note=Colocalizes with NEK6 in the centrosome. {ECO:0000250}.		antigen processing and presentation [GO:0019882]; cellular response to osmotic stress [GO:0071470]; circadian regulation of gene expression [GO:0032922]; I-kappaB kinase/NF-kappaB signaling [GO:0007249]; inflammatory response [GO:0006954]; innate immune response [GO:0045087]; lymphocyte differentiation [GO:0030098]; myeloid dendritic cell differentiation [GO:0043011]; negative regulation of inter…	chromatin binding [GO:0003682]; DNA binding [GO:0003677]; DNA-binding transcription factor activity, RNA polymerase II-specific [GO:0000981]; identical protein binding [GO:0042802]; protein kinase binding [GO:0019901]; RNA polymerase II cis-regulatory region sequence-specific DNA binding [GO:0000978]; RNA polymerase II transcription regulatory region sequence-specific DNA binding [GO:0000977]	centrosome [GO:0005813]; cytosol [GO:0005829]; nuclear chromatin [GO:0000790]; nucleoplasm [GO:0005654]; nucleus [GO:0005634]; protein-containing complex [GO:0032991]; transcription repressor complex [GO:0017053]	GO:0000122; GO:0000790; GO:0000977; GO:0000978; GO:0000981; GO:0003677; GO:0003682; GO:0005634; GO:0005654; GO:0005813; GO:0005829; GO:0006954; GO:0007249; GO:0010628; GO:0017053; GO:0019882; GO:0019901; GO:0030098; GO:0032688; GO:0032922; GO:0032991; GO:0034097; GO:0038061; GO:0042088; GO:0042802; GO:0043011; GO:0045063; GO:0045087; GO:0045892; GO:0045944; GO:0071470	R-MMU-5607761;R-MMU-5621575;R-MMU-5676590;	mmu:19698;	14.8556	14.4491	15.0593	14.5046	14.4017	15.477	15.4397	15.3788	15.8996	15.4995
Rac2_Q05144	1.01958	0.599405	0.78406	1.57178	0.273892	-1.25009	-0.593011	-1.41169	-0.356015	-0.637903	Rac2	Ras-related C3 botulinum toxin substrate 2	Q05144	1.05206	5.99001e-05	0.00357163	0.738021	sp|Q05144|RAC2_MOUSE Ras-related C3 botulinum toxin substrate 2 OS=Mus musculus OX=10090 GN=Rac2 PE=1 SV=1	FUNCTION: Plasma membrane-associated small GTPase which cycles between an active GTP-bound and inactive GDP-bound state. In active state binds to a variety of effector proteins to regulate cellular responses, such as secretory processes, phagocytose of apoptotic cells and epithelial cell polarization. Augments the production of reactive oxygen species (ROS) by NADPH oxidase.	SUBCELLULAR LOCATION: Cytoplasm {ECO:0000250}. Membrane {ECO:0000250}; Lipid-anchor {ECO:0000250}. Note=Membrane-associated when activated. {ECO:0000250}.		actin cytoskeleton organization [GO:0030036]; actin filament organization [GO:0007015]; bone resorption [GO:0045453]; cell projection assembly [GO:0030031]; chemotaxis [GO:0006935]; cortical cytoskeleton organization [GO:0030865]; engulfment of apoptotic cell [GO:0043652]; establishment or maintenance of cell polarity [GO:0007163]; G protein-coupled receptor signaling pathway [GO:0007186]; lympho…	GTPase activity [GO:0003924]; GTP binding [GO:0005525]; protein kinase binding [GO:0019901]; protein kinase regulator activity [GO:0019887]	actin filament [GO:0005884]; cell cortex [GO:0005938]; cell projection [GO:0042995]; cytoplasm [GO:0005737]; cytoplasmic vesicle [GO:0031410]; cytoskeleton [GO:0005856]; cytosol [GO:0005829]; intracellular membrane-bounded organelle [GO:0043231]; lamellipodium [GO:0030027]; membrane [GO:0016020]; nuclear envelope [GO:0005635]; plasma membrane [GO:0005886]; vesicle [GO:0031982]	GO:0003924; GO:0005525; GO:0005635; GO:0005737; GO:0005829; GO:0005856; GO:0005884; GO:0005886; GO:0005938; GO:0006935; GO:0007015; GO:0007163; GO:0007186; GO:0008045; GO:0008284; GO:0008360; GO:0010592; GO:0010810; GO:0016020; GO:0016601; GO:0019887; GO:0019901; GO:0030027; GO:0030031; GO:0030036; GO:0030865; GO:0031410; GO:0031982; GO:0032956; GO:0042129; GO:0042995; GO:0043231; GO:0043304; GO:…	R-MMU-114604;R-MMU-1222556;R-MMU-1257604;R-MMU-194840;R-MMU-4086400;R-MMU-5668599;R-MMU-6811558;	mmu:19354;	14.9874	14.8049	14.8851	15.2272	14.6636	14.0018	14.2871	13.9316	14.39	14.2676
Sept8_Q8CHH9	-0.76206	-0.453551	-1.30256	-1.29909	-0.527656	0.98541	1.24078	1.00461	0.104054	1.01006	Sept8	Septin-8	Q8CHH9	1.02814	6.10948e-05	0.00358832	-0.47182	sp|Q8CHH9|SEPT8_MOUSE Septin-8 OS=Mus musculus OX=10090 GN=Sept8 PE=1 SV=4	FUNCTION: Filament-forming cytoskeletal GTPase (By similarity). May play a role in platelet secretion (By similarity). Seems to participate in the process of SNARE complex formation in synaptic vesicles (By similarity). {ECO:0000250|UniProtKB:B0BNF1, ECO:0000250|UniProtKB:Q92599}.	SUBCELLULAR LOCATION: Cytoplasm {ECO:0000250|UniProtKB:B0BNF1}. Cytoplasm, cytoskeleton {ECO:0000250}. Cell junction, synapse {ECO:0000250|UniProtKB:B0BNF1}. Cell projection, axon {ECO:0000250|UniProtKB:B0BNF1}. Cytoplasmic vesicle, secretory vesicle, synaptic vesicle membrane {ECO:0000250|UniProtKB:B0BNF1}. Cell junction, synapse, presynapse {ECO:0000250|UniProtKB:B0BNF1}. Note=Expressed in axon…		cellular protein localization [GO:0034613]; cytoskeleton-dependent cytokinesis [GO:0061640]; regulation of intracellular protein transport [GO:0033157]; regulation of protein stability [GO:0031647]; regulation of SNARE complex assembly [GO:0035542]	GTPase activity [GO:0003924]; GTP binding [GO:0005525]; molecular adaptor activity [GO:0060090]; SNARE binding [GO:0000149]	axon [GO:0030424]; cell division site [GO:0032153]; microtubule cytoskeleton [GO:0015630]; myelin sheath [GO:0043209]; presynapse [GO:0098793]; septin complex [GO:0031105]; septin ring [GO:0005940]; synaptic vesicle membrane [GO:0030672]	GO:0000149; GO:0003924; GO:0005525; GO:0005940; GO:0015630; GO:0030424; GO:0030672; GO:0031105; GO:0031647; GO:0032153; GO:0033157; GO:0034613; GO:0035542; GO:0043209; GO:0060090; GO:0061640; GO:0098793		mmu:20362;	16.7959	16.8796	16.6491	16.6501	16.8595	17.2703	17.3396	17.2755	17.031	17.277
Slc16a1_P53986	-0.777053	-0.409071	-0.656631	-1.09757	-1.32647	1.4797	0.961981	1.16841	0.0658889	0.590806	Slc16a1	Monocarboxylate transporter 1	P53986	1.03871	6.163e-05	0.00358832	-0.64218	sp|P53986|MOT1_MOUSE Monocarboxylate transporter 1 OS=Mus musculus OX=10090 GN=Slc16a1 PE=1 SV=1	FUNCTION: Proton-coupled monocarboxylate transporter. Catalyzes the rapid transport across the plasma membrane of many monocarboxylates such as lactate, pyruvate, branched-chain oxo acids derived from leucine, valine and isoleucine, and the ketone bodies acetoacetate, beta-hydroxybutyrate and acetate. Depending on the tissue and on cicumstances, mediates the import or export of lactic acid and ke…	SUBCELLULAR LOCATION: Cell membrane {ECO:0000269|PubMed:21792931, ECO:0000269|PubMed:8603082}; Multi-pass membrane protein {ECO:0000255}.		behavioral response to nutrient [GO:0051780]; carboxylic acid transmembrane transport [GO:1905039]; cellular response to organic cyclic compound [GO:0071407]; centrosome cycle [GO:0007098]; glucose homeostasis [GO:0042593]; lactate transmembrane transport [GO:0035873]; lipid metabolic process [GO:0006629]; monocarboxylic acid transport [GO:0015718]; plasma membrane lactate transport [GO:0035879];…	carboxylic acid transmembrane transporter activity [GO:0046943]; identical protein binding [GO:0042802]; lactate transmembrane transporter activity [GO:0015129]; monocarboxylic acid transmembrane transporter activity [GO:0008028]; organic cyclic compound binding [GO:0097159]; symporter activity [GO:0015293]	apical plasma membrane [GO:0016324]; basal plasma membrane [GO:0009925]; basolateral plasma membrane [GO:0016323]; cell junction [GO:0030054]; centrosome [GO:0005813]; integral component of membrane [GO:0016021]; integral component of plasma membrane [GO:0005887]; intracellular membrane-bounded organelle [GO:0043231]; lateral plasma membrane [GO:0016328]; mitochondrion [GO:0005739]; plasma membra…	GO:0005739; GO:0005813; GO:0005886; GO:0005887; GO:0006629; GO:0007098; GO:0008028; GO:0009925; GO:0015129; GO:0015293; GO:0015718; GO:0016021; GO:0016323; GO:0016324; GO:0016328; GO:0030054; GO:0032094; GO:0035873; GO:0035879; GO:0042593; GO:0042802; GO:0043231; GO:0045202; GO:0046943; GO:0050796; GO:0051780; GO:0071407; GO:0097159; GO:1905039	R-MMU-210991;R-MMU-433692;R-MMU-70268;	mmu:20501;	16.6196	16.7581	16.6649	16.499	16.4129	17.4687	17.2739	17.3516	16.9368	17.1343
Rtn2_O70622	-1.60308	-0.483097	-0.44659	-1.15879	-0.616873	1.2963	0.889888	0.90105	0.261205	0.95999	Rtn2	Reticulon-2	O70622	1.03502	6.38457e-05	0.00364477	-0.522356	sp|O70622|RTN2_MOUSE Reticulon-2 OS=Mus musculus OX=10090 GN=Rtn2 PE=1 SV=1	FUNCTION: Inhibits amyloid precursor protein processing, probably by blocking BACE1 activity (By similarity). Enhances trafficking of the glutamate transporter SLC1A1/EAAC1 from the endoplasmic reticulum to the cell surface (By similarity). Plays a role in the translocation of SLC2A4/GLUT4 from intracellular membranes to the cell membrane which facilitates the uptake of glucose into the cell (Pub…	SUBCELLULAR LOCATION: Endoplasmic reticulum membrane {ECO:0000250|UniProtKB:O75298}; Multi-pass membrane protein {ECO:0000255}. Sarcoplasmic reticulum membrane {ECO:0000269|PubMed:19720795}; Multi-pass membrane protein {ECO:0000255}. Cell membrane {ECO:0000250|UniProtKB:Q6WN19}; Multi-pass membrane protein {ECO:0000255}. Cell membrane, sarcolemma {ECO:0000269|PubMed:19720795}; Multi-pass membrane…		intracellular protein transmembrane transport [GO:0065002]; regulation of glucose import [GO:0046324]		endoplasmic reticulum [GO:0005783]; endoplasmic reticulum membrane [GO:0005789]; integral component of membrane [GO:0016021]; terminal cisterna [GO:0014802]; T-tubule [GO:0030315]	GO:0005783; GO:0005789; GO:0014802; GO:0016021; GO:0030315; GO:0046324; GO:0065002		mmu:20167;	14.6893	15.0288	15.0399	14.824	14.9883	15.5681	15.445	15.4483	15.2544	15.4662
Etfb_Q9DCW4	-1.04912	-1.00243	-0.452153	-1.00656	-0.892834	1.04517	1.46894	0.797042	0.992131	0.0998139	Etfb	Electron transfer flavoprotein subunit beta	Q9DCW4	1.02167	6.40725e-05	0.00364477	-0.403971	sp|Q9DCW4|ETFB_MOUSE Electron transfer flavoprotein subunit beta OS=Mus musculus OX=10090 GN=Etfb PE=1 SV=3	FUNCTION: Heterodimeric electron transfer flavoprotein that accepts electrons from several mitochondrial dehydrogenases, including acyl-CoA dehydrogenases, glutaryl-CoA and sarcosine dehydrogenase. It transfers the electrons to the main mitochondrial respiratory chain via ETF-ubiquinone oxidoreductase (By similarity). Required for normal mitochondrial fatty acid oxidation and normal amino acid me…	SUBCELLULAR LOCATION: Mitochondrion matrix {ECO:0000250|UniProtKB:P38117}.		fatty acid beta-oxidation using acyl-CoA dehydrogenase [GO:0033539]	electron transfer activity [GO:0009055]; nucleotide binding [GO:0000166]	mitochondrial electron transfer flavoprotein complex [GO:0017133]; mitochondrial matrix [GO:0005759]; mitochondrion [GO:0005739]	GO:0000166; GO:0005739; GO:0005759; GO:0009055; GO:0017133; GO:0033539	R-MMU-611105;R-MMU-8876725;	mmu:110826;	18.6008	18.6115	18.7377	18.6106	18.6366	19.0812	19.1784	19.0242	19.069	18.8643
Ptpn11_P35235	-0.601663	-1.05013	-1.32244	-0.976933	-0.469978	1.24724	0.732853	1.37245	0.355591	0.713003	Ptpn11	Tyrosine-protein phosphatase non-receptor type 11	P35235	1.02193	6.68797e-05	0.00376122	-0.38599	sp|P35235|PTN11_MOUSE Tyrosine-protein phosphatase non-receptor type 11 OS=Mus musculus OX=10090 GN=Ptpn11 PE=1 SV=2	FUNCTION: Acts downstream of various receptor and cytoplasmic protein tyrosine kinases to participate in the signal transduction from the cell surface to the nucleus (PubMed:14967142). Positively regulates MAPK signal transduction pathway (By similarity). Dephosphorylates GAB1, ARHGAP35 and EGFR (By similarity). Dephosphorylates ROCK2 at 'Tyr-722' resulting in stimulation of its RhoA binding acti…	SUBCELLULAR LOCATION: Cytoplasm.		abortive mitotic cell cycle [GO:0033277]; activation of MAPK activity [GO:0000187]; atrioventricular canal development [GO:0036302]; axonogenesis [GO:0007409]; Bergmann glial cell differentiation [GO:0060020]; brain development [GO:0007420]; cellular response to epidermal growth factor stimulus [GO:0071364]; cellular response to mechanical stimulus [GO:0071260]; cerebellar cortex formation [GO:00…	cadherin binding [GO:0045296]; cell adhesion molecule binding [GO:0050839]; D1 dopamine receptor binding [GO:0031748]; insulin receptor binding [GO:0005158]; insulin receptor substrate binding [GO:0043560]; non-membrane spanning protein tyrosine phosphatase activity [GO:0004726]; peptide hormone receptor binding [GO:0051428]; phospholipase binding [GO:0043274]; phosphoprotein phosphatase activity…	cytoplasm [GO:0005737]; cytosol [GO:0005829]; mitochondrion [GO:0005739]; nucleus [GO:0005634]; protein-containing complex [GO:0032991]	GO:0000077; GO:0000187; GO:0001784; GO:0004721; GO:0004725; GO:0004726; GO:0005158; GO:0005634; GO:0005737; GO:0005739; GO:0005829; GO:0006470; GO:0006629; GO:0006641; GO:0007173; GO:0007229; GO:0007409; GO:0007420; GO:0007507; GO:0008543; GO:0009755; GO:0009967; GO:0019901; GO:0019904; GO:0021697; GO:0030159; GO:0030220; GO:0030971; GO:0031748; GO:0032331; GO:0032528; GO:0032728; GO:0032755; GO:…	R-MMU-1059683;R-MMU-109704;R-MMU-110056;R-MMU-112411;R-MMU-114604;R-MMU-1257604;R-MMU-1295596;R-MMU-1433557;R-MMU-180292;R-MMU-186763;R-MMU-210990;R-MMU-210993;R-MMU-388841;R-MMU-389513;R-MMU-389948;R-MMU-432142;R-MMU-512988;R-MMU-5654689;R-MMU-5654693;R-MMU-5654695;R-MMU-5654700;R-MMU-5654706;R-MMU-5654710;R-MMU-5654712;R-MMU-5654720;R-MMU-5654726;R-MMU-5654727;R-MMU-5654732;R-MMU-5654733;R-MMU-…	mmu:19247;	17.6654	17.5675	17.5081	17.5835	17.6942	18.069	17.9567	18.0963	17.8744	17.9524
Ppfia2_Q8BSS9	-0.48234	-1.09818	-0.492816	-1.16098	-1.1337	1.00417	0.238723	0.762422	1.53315	0.829552	Ppfia2	Liprin-alpha-2	Q8BSS9	1.02838	6.95307e-05	0.00386211	-0.426556	sp|Q8BSS9|LIPA2_MOUSE Liprin-alpha-2 OS=Mus musculus OX=10090 GN=Ppfia2 PE=1 SV=2	FUNCTION: Alters PTPRF cellular localization and induces PTPRF clustering. May regulate the disassembly of focal adhesions. May localize receptor-like tyrosine phosphatases type 2A at specific sites on the plasma membrane, possibly regulating their interaction with the extracellular environment and their association with substrates. In neuronal cells, is a scaffolding protein in the dendritic spi…	SUBCELLULAR LOCATION: Cytoplasm {ECO:0000250|UniProtKB:O75334}. Cell surface {ECO:0000250|UniProtKB:O75334}. Cell projection, dendritic spine {ECO:0000250|UniProtKB:O75334}. Note=Colocalizes with PTPRF at the cell surface. {ECO:0000250|UniProtKB:O75334}.		dense core granule cytoskeletal transport [GO:0099519]; regulation of dendritic spine development [GO:0060998]; regulation of dendritic spine morphogenesis [GO:0061001]; regulation of synaptic vesicle exocytosis [GO:2000300]; synapse organization [GO:0050808]	protein-containing complex binding [GO:0044877]; structural constituent of presynapse [GO:0099181]	axon [GO:0030424]; cell surface [GO:0009986]; dendritic spine [GO:0043197]; glutamatergic synapse [GO:0098978]; presynaptic active zone [GO:0048786]; presynaptic cytosol [GO:0099523]; synapse [GO:0045202]	GO:0009986; GO:0030424; GO:0043197; GO:0044877; GO:0045202; GO:0048786; GO:0050808; GO:0060998; GO:0061001; GO:0098978; GO:0099181; GO:0099519; GO:0099523; GO:2000300	R-MMU-181429;R-MMU-181430;R-MMU-210500;R-MMU-212676;R-MMU-264642;R-MMU-388844;	mmu:327814;	15.1261	14.9757	15.1235	14.9604	14.9671	15.489	15.3021	15.43	15.6181	15.4464
Pde3b_Q61409	-0.559068	-1.10101	-1.08093	-1.29993	-0.291507	1.23654	0.537122	1.44289	0.48738	0.628506	Pde3b	cGMP-inhibited 3,5-cyclic phosphodiesterase B	Q61409	1.02884	7.02343e-05	0.00386211	-0.466071	sp|Q61409|PDE3B_MOUSE cGMP-inhibited 3,5-cyclic phosphodiesterase B OS=Mus musculus OX=10090 GN=Pde3b PE=1 SV=2	FUNCTION: Cyclic nucleotide phosphodiesterase with a dual-specificity for the second messengers cAMP and cGMP, which are key regulators of many important physiological processes. May play a role in fat metabolism. Regulates cAMP binding of RAPGEF3. Through simultaneous binding to RAPGEF3 and PIK3R6 assembles a signaling complex in which the PI3K gamma complex is activated by RAPGEF3 and which is …	SUBCELLULAR LOCATION: Membrane {ECO:0000305}; Multi-pass membrane protein {ECO:0000305}.		angiogenesis [GO:0001525]; cellular response to insulin stimulus [GO:0032869]; endocrine pancreas development [GO:0031018]; glucose homeostasis [GO:0042593]; negative regulation of angiogenesis [GO:0016525]; negative regulation of cAMP-mediated signaling [GO:0043951]; negative regulation of cell adhesion [GO:0007162]; negative regulation of insulin secretion involved in cellular response to gluco…	3',5'-cyclic-AMP phosphodiesterase activity [GO:0004115]; 3',5'-cyclic-nucleotide phosphodiesterase activity [GO:0004114]; metal ion binding [GO:0046872]; phosphoprotein binding [GO:0051219]; protein kinase B binding [GO:0043422]	cytosol [GO:0005829]; endoplasmic reticulum [GO:0005783]; Golgi apparatus [GO:0005794]; guanyl-nucleotide exchange factor complex [GO:0032045]; integral component of membrane [GO:0016021]; membrane [GO:0016020]	GO:0001525; GO:0004114; GO:0004115; GO:0005783; GO:0005794; GO:0005829; GO:0007162; GO:0007165; GO:0016020; GO:0016021; GO:0016525; GO:0031018; GO:0032045; GO:0032869; GO:0042593; GO:0043422; GO:0043951; GO:0046872; GO:0050796; GO:0050995; GO:0051219; GO:0061179	R-MMU-165160;R-MMU-418555;	mmu:18576;	16.2447	16.0989	16.1043	16.0454	16.3166	16.7276	16.5395	16.7831	16.5261	16.5641
Agpat2_Q8K3K7	-1.14134	-0.245343	-0.37328	-1.2059	-1.30031	1.48258	0.593316	1.06824	0.434268	0.687769	Agpat2	1-acyl-sn-glycerol-3-phosphate acyltransferase beta	Q8K3K7	1.03459	7.16435e-05	0.0038963	-0.58896	sp|Q8K3K7|PLCB_MOUSE 1-acyl-sn-glycerol-3-phosphate acyltransferase beta OS=Mus musculus OX=10090 GN=Agpat2 PE=1 SV=1	FUNCTION: Converts 1-acyl-sn-glycerol-3-phosphate (lysophosphatidic acid or LPA) into 1,2-diacyl-sn-glycerol-3-phosphate (phosphatidic acid or PA) by incorporating an acyl moiety at the sn-2 position of the glycerol backbone. {ECO:0000269|PubMed:15367102}.	SUBCELLULAR LOCATION: Endoplasmic reticulum membrane {ECO:0000250|UniProtKB:O15120}; Multi-pass membrane protein {ECO:0000255}.		CDP-diacylglycerol biosynthetic process [GO:0016024]; epidermis development [GO:0008544]; phosphatidic acid biosynthetic process [GO:0006654]; phospholipid biosynthetic process [GO:0008654]; positive regulation of cytokine production [GO:0001819]; response to drug [GO:0042493]	1-acylglycerol-3-phosphate O-acyltransferase activity [GO:0003841]	endoplasmic reticulum [GO:0005783]; endoplasmic reticulum membrane [GO:0005789]; integral component of membrane [GO:0016021]	GO:0001819; GO:0003841; GO:0005783; GO:0005789; GO:0006654; GO:0008544; GO:0008654; GO:0016021; GO:0016024; GO:0042493	R-MMU-1483166;R-MMU-6798695;	mmu:67512;	16.9253	17.2346	17.1904	16.903	16.8705	17.8309	17.524	17.6879	17.4691	17.5566
Paics_Q9DCL9	-0.957571	-1.17306	-1.21137	-0.578246	-0.369734	0.752168	1.60381	1.14735	0.344813	0.441841	Paics	Multifunctional protein ADE2;Phosphoribosylaminoimidazole-succinocarboxamide synthase;Phosphoribosylaminoimidazole carboxylase	Q9DCL9	1.02987	7.2682e-05	0.00390982	-0.528512	sp|Q9DCL9|PUR6_MOUSE Multifunctional protein ADE2 OS=Mus musculus OX=10090 GN=Paics PE=1 SV=4				'de novo' IMP biosynthetic process [GO:0006189]	5-amino-4-imidazole carboxylate lyase activity [GO:0043727]; ATP binding [GO:0005524]; identical protein binding [GO:0042802]; phosphoribosylaminoimidazole carboxylase activity [GO:0004638]; phosphoribosylaminoimidazolesuccinocarboxamide synthase activity [GO:0004639]	cytoplasm [GO:0005737]; cytosol [GO:0005829]	GO:0004638; GO:0004639; GO:0005524; GO:0005737; GO:0005829; GO:0006189; GO:0042802; GO:0043727	R-MMU-73817;	mmu:67054;	17.6621	17.5958	17.584	17.779	17.8432	18.1887	18.451	18.3104	18.0633	18.0931
Auh_Q9JLZ3	-0.531365	-0.686066	-0.83445	-1.53194	-0.894909	1.19913	0.879194	1.12435	0.876504	0.399552	Auh	Methylglutaconyl-CoA hydratase, mitochondrial	Q9JLZ3	1.02078	7.3609e-05	0.0039171	-0.344671	sp|Q9JLZ3|AUHM_MOUSE Methylglutaconyl-CoA hydratase, mitochondrial OS=Mus musculus OX=10090 GN=Auh PE=1 SV=1	FUNCTION: Catalyzes the conversion of 3-methylglutaconyl-CoA to 3-hydroxy-3-methylglutaryl-CoA (By similarity). Also has itaconyl-CoA hydratase activity by converting itaconyl-CoA into citramalyl-CoA in the C5-dicarboxylate catabolism pathway (By similarity). The C5-dicarboxylate catabolism pathway is required to detoxify itaconate, a vitamin B12-poisoning metabolite (By similarity). Has very low…	SUBCELLULAR LOCATION: Mitochondrion {ECO:0000269|PubMed:10072761}.		fatty acid beta-oxidation [GO:0006635]; leucine catabolic process [GO:0006552]	enoyl-CoA hydratase activity [GO:0004300]; itaconyl-CoA hydratase activity [GO:0050011]; methylglutaconyl-CoA hydratase activity [GO:0004490]; mRNA 3'-UTR binding [GO:0003730]; RNA binding [GO:0003723]	mitochondrion [GO:0005739]	GO:0003723; GO:0003730; GO:0004300; GO:0004490; GO:0005739; GO:0006552; GO:0006635; GO:0050011	R-MMU-70895;	mmu:11992;	16.6545	16.6247	16.5962	16.462	16.5846	16.9874	16.9259	16.973	16.9254	16.8336
Ltbp4_Q8K4G1	-0.3311	-0.960885	-1.05879	-1.2839	-0.787642	1.14582	0.741741	1.35713	0.289684	0.887942	Ltbp4	Latent-transforming growth factor beta-binding protein 4	Q8K4G1	1.02435	7.46023e-05	0.00392773	-0.375509	sp|Q8K4G1|LTBP4_MOUSE Latent-transforming growth factor beta-binding protein 4 OS=Mus musculus OX=10090 GN=Ltbp4 PE=1 SV=2	FUNCTION: Key regulator of transforming growth factor beta (TGFB1, TGFB2 and TGFB3) that controls TGF-beta activation by maintaining it in a latent state during storage in extracellular space. Associates specifically via disulfide bonds with the Latency-associated peptide (LAP), which is the regulatory chain of TGF-beta, and regulates integrin-dependent activation of TGF-beta. {ECO:0000250|UniPro…	SUBCELLULAR LOCATION: Secreted, extracellular space, extracellular matrix {ECO:0000250|UniProtKB:Q8N2S1}.		hormone secretion [GO:0046879]; regulation of proteolysis [GO:0030162]; transforming growth factor beta receptor signaling pathway [GO:0007179]	calcium ion binding [GO:0005509]; transforming growth factor beta binding [GO:0050431]	collagen-containing extracellular matrix [GO:0062023]; extracellular matrix [GO:0031012]	GO:0005509; GO:0007179; GO:0030162; GO:0031012; GO:0046879; GO:0050431; GO:0062023	R-MMU-2129379;	mmu:108075;	15.5374	15.4038	15.383	15.3352	15.4405	15.851	15.7652	15.8958	15.6692	15.7962
Ube2e1_P52482	-0.767543	-0.464562	-1.24854	-0.471599	-1.33714	0.268223	1.32288	1.13501	1.16489	0.398374	Ube2e1	Ubiquitin-conjugating enzyme E2 E1	P52482	1.04289	7.75095e-05	0.00402389	-0.514786	sp|P52482|UB2E1_MOUSE Ubiquitin-conjugating enzyme E2 E1 OS=Mus musculus OX=10090 GN=Ube2e1 PE=1 SV=1	FUNCTION: Accepts ubiquitin from the E1 complex and catalyzes its covalent attachment to other proteins. Catalyzes the covalent attachment of ISG15 to other proteins. Mediates the selective degradation of short-lived and abnormal proteins. In vitro also catalyzes 'Lys-48'-linked polyubiquitination. {ECO:0000250|UniProtKB:P51965}.	SUBCELLULAR LOCATION: Nucleus {ECO:0000250|UniProtKB:P51965}.		histone H2B ubiquitination [GO:0033523]; histone monoubiquitination [GO:0010390]; ISG15-protein conjugation [GO:0032020]; protein K48-linked ubiquitination [GO:0070936]; protein polyubiquitination [GO:0000209]; protein ubiquitination [GO:0016567]	ATP binding [GO:0005524]; ISG15 transferase activity [GO:0042296]; ubiquitin conjugating enzyme activity [GO:0061631]; ubiquitin-protein transferase activity [GO:0004842]	nucleus [GO:0005634]; ubiquitin ligase complex [GO:0000151]	GO:0000151; GO:0000209; GO:0004842; GO:0005524; GO:0005634; GO:0010390; GO:0016567; GO:0032020; GO:0033523; GO:0042296; GO:0061631; GO:0070936	R-MMU-1169408;R-MMU-141430;R-MMU-174048;R-MMU-174084;R-MMU-174154;R-MMU-174178;R-MMU-174184;R-MMU-176407;R-MMU-176408;R-MMU-176409;R-MMU-176412;R-MMU-179409;R-MMU-2467813;R-MMU-2559582;R-MMU-69017;R-MMU-8866652;R-MMU-8866654;R-MMU-983168;	mmu:22194;	12.0309	12.1218	11.8866	12.1197	11.86	12.3417	12.6581	12.6018	12.6107	12.3807
Lama3_Q61789	-0.0547956	-1.08622	-1.40616	-0.834314	-0.814728	1.33891	0.676587	1.28298	0.148469	0.749275	Lama3	Laminin subunit alpha-3	Q61789	1.08801	7.80548e-05	0.00402389	-0.918137	sp|Q61789|LAMA3_MOUSE Laminin subunit alpha-3 OS=Mus musculus OX=10090 GN=Lama3 PE=1 SV=4	FUNCTION: Binding to cells via a high affinity receptor, laminin is thought to mediate the attachment, migration and organization of cells into tissues during embryonic development by interacting with other extracellular matrix components.; FUNCTION: Laminin-5 is thought to be involved in (1) cell adhesion via integrin alpha-3/beta-1 in focal adhesion and integrin alpha-6/beta-4 in hemidesmosomes…	SUBCELLULAR LOCATION: Secreted, extracellular space, extracellular matrix, basement membrane. Note=Major component.		animal organ morphogenesis [GO:0009887]; axon guidance [GO:0007411]; cell-cell adhesion [GO:0098609]; cell migration [GO:0016477]; endodermal cell differentiation [GO:0035987]; hemidesmosome assembly [GO:0031581]; integrin-mediated signaling pathway [GO:0007229]; morphogenesis of a polarized epithelium [GO:0001738]; regulation of cell adhesion [GO:0030155]; regulation of cell migration [GO:003033…	extracellular matrix structural constituent [GO:0005201]; integrin binding [GO:0005178]	adherens junction [GO:0005912]; basement membrane [GO:0005604]; collagen-containing extracellular matrix [GO:0062023]; endoplasmic reticulum [GO:0005783]; extracellular region [GO:0005576]; hemidesmosome [GO:0030056]; laminin-3 complex [GO:0005608]; laminin-5 complex [GO:0005610]	GO:0001738; GO:0005178; GO:0005201; GO:0005576; GO:0005604; GO:0005608; GO:0005610; GO:0005783; GO:0005912; GO:0007229; GO:0007411; GO:0009887; GO:0009888; GO:0016477; GO:0030056; GO:0030155; GO:0030334; GO:0031581; GO:0035987; GO:0045995; GO:0062023; GO:0098609	R-MMU-1474228;R-MMU-2022090;R-MMU-2214320;R-MMU-3000157;R-MMU-446107;R-MMU-8874081;	mmu:16774;	10.8615	10.2973	10.1223	10.4351	10.4458	11.6239	11.2616	11.5933	10.9727	11.3013
Dnajc11_Q5U458	-1.3763	-1.29282	-0.496386	-0.754287	-0.528895	0.712661	1.14709	1.01607	1.13737	0.435486	Dnajc11	DnaJ homolog subfamily C member 11	Q5U458	1.02358	8.00281e-05	0.0040431	-0.354237	sp|Q5U458|DJC11_MOUSE DnaJ homolog subfamily C member 11 OS=Mus musculus OX=10090 GN=Dnajc11 PE=1 SV=2	FUNCTION: Required for mitochondrial inner membrane organization. Seems to function through its association with the MICOS complex and the mitochondrial outer membrane sorting assembly machinery (SAM) complex. {ECO:0000269|PubMed:25111180, ECO:0000305}.	SUBCELLULAR LOCATION: Mitochondrion {ECO:0000250|UniProtKB:Q9NVH1, ECO:0000269|PubMed:25111180}. Mitochondrion outer membrane {ECO:0000250|UniProtKB:Q9NVH1}; Peripheral membrane protein {ECO:0000250|UniProtKB:Q9NVH1}.		cristae formation [GO:0042407]		MICOS complex [GO:0061617]; mitochondrial inner membrane [GO:0005743]; mitochondrial outer membrane [GO:0005741]; mitochondrion [GO:0005739]; SAM complex [GO:0001401]	GO:0001401; GO:0005739; GO:0005741; GO:0005743; GO:0042407; GO:0061617		mmu:230935;	14.9263	14.9429	15.1015	15.0501	15.095	15.3422	15.4286	15.4026	15.4267	15.287
Ngp_O08692	1.24937	1.22477	1.07577	0.907235	-0.289374	-1.16532	-0.556625	-0.561661	-0.700636	-1.18353	Ngp	Neutrophilic granule protein	O08692	1.08859	8.25358e-05	0.0040431	1.36144	sp|O08692|NGP_MOUSE Neutrophilic granule protein OS=Mus musculus OX=10090 GN=Ngp PE=1 SV=1	FUNCTION: Acts as an inhibitor of cathepsin B (CTSB) activity. Plays a role as a negative regulator of tumor vascular development, cell invasion and metastasis. {ECO:0000269|PubMed:21518852}.	SUBCELLULAR LOCATION: Secreted {ECO:0000269|PubMed:21518852}. Cytoplasmic granule {ECO:0000269|PubMed:8749713}. Note=Localizes in cytoplasmic granules of neutrophilic precursors (PubMed:8749713). {ECO:0000269|PubMed:21518852, ECO:0000269|PubMed:8749713}.		defense response [GO:0006952]; negative regulation of angiogenesis [GO:0016525]; negative regulation of lymphangiogenesis [GO:1901491]	cysteine-type endopeptidase inhibitor activity [GO:0004869]	cytoplasmic vesicle [GO:0031410]; extracellular space [GO:0005615]	GO:0004869; GO:0005615; GO:0006952; GO:0016525; GO:0031410; GO:1901491		mmu:18054;	17.068	17.0479	16.9262	16.7886	15.8114	15.096	15.5931	15.589	15.4755	15.0812
Sod3_O09164	-0.651863	-0.642253	-1.02102	-1.49434	-0.447262	1.67061	0.474421	0.797109	0.364459	0.95014	Sod3	Extracellular superoxide dismutase [Cu-Zn]	O09164	1.03408	8.30855e-05	0.0040431	-0.567105	sp|O09164|SODE_MOUSE Extracellular superoxide dismutase [Cu-Zn] OS=Mus musculus OX=10090 GN=Sod3 PE=1 SV=1	FUNCTION: Protect the extracellular space from toxic effect of reactive oxygen intermediates by converting superoxide radicals into hydrogen peroxide and oxygen. {ECO:0000250}.	SUBCELLULAR LOCATION: Secreted, extracellular space.		regulation of blood vessel diameter [GO:0097746]; removal of superoxide radicals [GO:0019430]; response to copper ion [GO:0046688]; response to hypoxia [GO:0001666]	copper ion binding [GO:0005507]; superoxide dismutase activity [GO:0004784]	collagen-containing extracellular matrix [GO:0062023]; cytoplasm [GO:0005737]; extracellular region [GO:0005576]; extracellular space [GO:0005615]; Golgi lumen [GO:0005796]; nucleus [GO:0005634]	GO:0001666; GO:0004784; GO:0005507; GO:0005576; GO:0005615; GO:0005634; GO:0005737; GO:0005796; GO:0019430; GO:0046688; GO:0062023; GO:0097746	R-MMU-3299685;	mmu:20657;	16.7074	16.7106	16.5845	16.4268	16.7756	17.481	17.0826	17.19	17.0459	17.241
Setd3_Q91WC0	-0.797573	-1.02257	-0.429789	-0.803101	-1.25913	1.36114	1.01879	1.15591	0.821194	-0.0448656	Setd3	Histone-lysine N-methyltransferase setd3	Q91WC0	1.03021	8.33749e-05	0.0040431	-0.464785	sp|Q91WC0|SETD3_MOUSE Histone-lysine N-methyltransferase setd3 OS=Mus musculus OX=10090 GN=Setd3 PE=1 SV=1	FUNCTION: Protein-histidine N-methyltransferase that specifically mediates methylation of actin at 'His-73' (PubMed:30626964). Histidine methylation of actin is required for smooth muscle contraction of the laboring uterus during delivery (PubMed:30626964). Does not have protein-lysine N-methyltransferase activity and probably only catalyzes histidine methylation of actin (PubMed:30626964). {ECO:…	SUBCELLULAR LOCATION: Cytoplasm {ECO:0000250|UniProtKB:Q86TU7}. Nucleus {ECO:0000269|PubMed:21832073}. Note=Localizes mainly in the cytoplasm. {ECO:0000250|UniProtKB:Q86TU7}.		actin modification [GO:0030047]; histone H3-K36 methylation [GO:0010452]; peptidyl-histidine methylation [GO:0018021]; peptidyl-lysine dimethylation [GO:0018027]; peptidyl-lysine monomethylation [GO:0018026]; peptidyl-lysine trimethylation [GO:0018023]; positive regulation of muscle cell differentiation [GO:0051149]; positive regulation of transcription, DNA-templated [GO:0045893]; positive regul…	actin binding [GO:0003779]; histone methyltransferase activity (H3-K36 specific) [GO:0046975]; histone methyltransferase activity (H3-K4 specific) [GO:0042800]; protein-histidine N-methyltransferase activity [GO:0018064]; protein-lysine N-methyltransferase activity [GO:0016279]; RNA polymerase II activating transcription factor binding [GO:0001102]; transcription coactivator activity [GO:0003713]	cytoplasm [GO:0005737]; nuclear chromatin [GO:0000790]	GO:0000790; GO:0001102; GO:0003713; GO:0003779; GO:0005737; GO:0010452; GO:0016279; GO:0018021; GO:0018023; GO:0018026; GO:0018027; GO:0018064; GO:0030047; GO:0042800; GO:0045893; GO:0045944; GO:0046975; GO:0051149; GO:0070472	R-MMU-3214841;	mmu:52690;	15.4044	15.3438	15.5035	15.403	15.2801	15.9861	15.8939	15.9308	15.8406	15.6073
Prx_O55103	-0.810096	-0.610624	-0.191163	-1.66236	-0.925698	1.26336	0.412234	1.10152	0.309906	1.11291	Prx	Periaxin	O55103	1.05506	8.42611e-05	0.0040431	-0.803545	sp|O55103|PRAX_MOUSE Periaxin OS=Mus musculus OX=10090 GN=Prx PE=1 SV=1	FUNCTION: Scaffolding protein that functions as part of a dystroglycan complex in Schwann cells, and as part of EZR and AHNAK-containing complexes in eye lens fiber cells (PubMed:11430802, PubMed:21745462, PubMed:22764250). Required for the maintenance of the peripheral myelin sheath that is essential for normal transmission of nerve impulses and normal perception of sensory stimuli (PubMed:10839…	SUBCELLULAR LOCATION: Cell membrane {ECO:0000269|PubMed:21745462}. Cell junction {ECO:0000269|PubMed:21745462}. Note=Colocalizes with ACTB at tricellular junctions between eye lens fiber cells. {ECO:0000269|PubMed:21745462}.; SUBCELLULAR LOCATION: [Isoform 1]: Cell membrane {ECO:0000269|PubMed:9488714}; Peripheral membrane protein {ECO:0000305}; Cytoplasmic side {ECO:0000305}. Nucleus {ECO:000026…		peripheral nervous system myelin formation [GO:0032290]; peripheral nervous system myelin maintenance [GO:0032287]; regulation of RNA splicing [GO:0043484]; sensory perception of pain [GO:0019233]; transmission of nerve impulse [GO:0019226]		cell junction [GO:0030054]; cytoplasm [GO:0005737]; cytosol [GO:0005829]; myelin sheath [GO:0043209]; nucleus [GO:0005634]; plasma membrane [GO:0005886]	GO:0005634; GO:0005737; GO:0005829; GO:0005886; GO:0019226; GO:0019233; GO:0030054; GO:0032287; GO:0032290; GO:0043209; GO:0043484		mmu:19153;	14.6093	14.7047	14.9053	14.2017	14.554	15.6011	15.194	15.5236	15.145	15.5291
Jcad_Q5DTX6	-0.757342	-0.829675	-1.19335	-0.892548	-0.577776	1.09907	1.1484	1.1886	-0.268025	1.08266	Jcad	Junctional protein associated with coronary artery disease	Q5DTX6	1.04293	8.61791e-05	0.0040431	-0.571231	sp|Q5DTX6|JCAD_MOUSE Junctional protein associated with coronary artery disease OS=Mus musculus OX=10090 GN=Jcad PE=1 SV=2		SUBCELLULAR LOCATION: Cell junction, adherens junction {ECO:0000269|PubMed:21884682}. Note=Colocalizes with VE-Cadherin, in endothelial cells but not in epithelial cells.		cell adhesion [GO:0007155]; positive regulation of blood vessel endothelial cell proliferation involved in sprouting angiogenesis [GO:1903589]; positive regulation of cell migration involved in sprouting angiogenesis [GO:0090050]; positive regulation of MAPK cascade [GO:0043410]; positive regulation of sprouting angiogenesis [GO:1903672]; positive regulation of vascular endothelial growth factor …		adherens junction [GO:0005912]; cell-cell junction [GO:0005911]; cell junction [GO:0030054]; perinuclear region of cytoplasm [GO:0048471]; ruffle membrane [GO:0032587]	GO:0005911; GO:0005912; GO:0007155; GO:0030054; GO:0032587; GO:0043410; GO:0048471; GO:0090050; GO:1900748; GO:1903589; GO:1903672		mmu:240185;	13.3369	13.3126	13.1905	13.2915	13.3973	13.9606	13.9772	13.9907	13.5013	13.9551
Cyp4b1_Q64462	-0.712266	-1.13461	-1.15966	-1.02871	-0.377351	1.19861	0.97917	1.11715	1.00146	0.116213	Cyp4b1	Cytochrome P450 4B1	Q64462	1.02318	8.75768e-05	0.0040431	-0.367987	sp|Q64462|CP4B1_MOUSE Cytochrome P450 4B1 OS=Mus musculus OX=10090 GN=Cyp4b1 PE=1 SV=1	FUNCTION: Responsible for mutagenic activation of 3-methoxy-4-aminoazobenzene (3-MeO-AAB); a potent procarcinogen. Also active on 2-aminofluorene and 2-aminoanthracene.	SUBCELLULAR LOCATION: Endoplasmic reticulum membrane; Peripheral membrane protein. Microsome membrane; Peripheral membrane protein.		biphenyl metabolic process [GO:0018879]	aromatase activity [GO:0070330]; heme binding [GO:0020037]; iron ion binding [GO:0005506]	endoplasmic reticulum membrane [GO:0005789]; intracellular membrane-bounded organelle [GO:0043231]	GO:0005506; GO:0005789; GO:0018879; GO:0020037; GO:0043231; GO:0070330	R-MMU-211935;R-MMU-211958;R-MMU-211979;R-MMU-2142691;	mmu:13120;	15.9127	15.8247	15.8194	15.8467	15.9825	16.3111	16.2654	16.2941	16.27	16.0854
Rint1_Q8BZ36	-1.25558	-0.161477	-0.532848	-1.18203	-1.16181	1.41633	0.695967	1.16348	0.462346	0.555616	Rint1	RAD50-interacting protein 1	Q8BZ36	1.03502	8.81159e-05	0.0040431	-0.481038	sp|Q8BZ36|RINT1_MOUSE RAD50-interacting protein 1 OS=Mus musculus OX=10090 GN=Rint1 PE=1 SV=2	FUNCTION: Involved in regulation of membrane traffic between the Golgi and the endoplasmic reticulum; the function is proposed to depend on its association in the NRZ complex which is believed to play a role in SNARE assembly at the ER. May play a role in cell cycle checkpoint control. Essential for telomere length control (By similarity). {ECO:0000250|UniProtKB:Q6NUQ1}.	SUBCELLULAR LOCATION: Cytoplasm {ECO:0000250|UniProtKB:Q6NUQ1}. Endoplasmic reticulum membrane {ECO:0000250|UniProtKB:Q6NUQ1}; Peripheral membrane protein {ECO:0000250|UniProtKB:Q6NUQ1}.		cell cycle [GO:0007049]; protein transport [GO:0015031]; regulation of ER to Golgi vesicle-mediated transport [GO:0060628]; regulation of signal transduction involved in mitotic G2 DNA damage checkpoint [GO:1902504]; retrograde vesicle-mediated transport, Golgi to endoplasmic reticulum [GO:0006890]		Dsl1/NZR complex [GO:0070939]; endoplasmic reticulum [GO:0005783]; endoplasmic reticulum membrane [GO:0005789]	GO:0005783; GO:0005789; GO:0006890; GO:0007049; GO:0015031; GO:0060628; GO:0070939; GO:1902504	R-MMU-6811434;	mmu:72772;	13.6256	13.932	13.828	13.6462	13.6518	14.3739	14.1722	14.3031	14.1067	14.1329
Ehhadh_Q9DBM2	-1.0464	-0.869684	-0.923303	-1.12343	-0.43621	1.75092	0.73171	0.539902	0.732322	0.644169	Ehhadh	Peroxisomal bifunctional enzyme;Enoyl-CoA hydratase/3,2-trans-enoyl-CoA isomerase;3-hydroxyacyl-CoA dehydrogenase	Q9DBM2	1.022	8.81454e-05	0.0040431	-0.376167	sp|Q9DBM2|ECHP_MOUSE Peroxisomal bifunctional enzyme OS=Mus musculus OX=10090 GN=Ehhadh PE=1 SV=4	FUNCTION: Peroxisomal trifunctional enzyme possessing 2-enoyl-CoA hydratase, 3-hydroxyacyl-CoA dehydrogenase, and delta 3, delta 2-enoyl-CoA isomerase activities. Catalyzes two of the four reactions of the long straight chain fatty acids peroxisomal beta-oxidation pathway. Optimal isomerase for 2,5 double bonds into 3,5 form isomerization in a range of enoyl-CoA species. Also able to isomerize bo…	SUBCELLULAR LOCATION: Peroxisome {ECO:0000305|PubMed:24075987}.		acyl-CoA metabolic process [GO:0006637]; fatty acid beta-oxidation [GO:0006635]	3-hydroxyacyl-CoA dehydrogenase activity [GO:0003857]; dodecenoyl-CoA delta-isomerase activity [GO:0004165]; enoyl-CoA hydratase activity [GO:0004300]; enzyme binding [GO:0019899]; intramolecular oxidoreductase activity, transposing C=C bonds [GO:0016863]; long-chain-3-hydroxyacyl-CoA dehydrogenase activity [GO:0016509]	cytosol [GO:0005829]; mitochondrion [GO:0005739]; peroxisome [GO:0005777]	GO:0003857; GO:0004165; GO:0004300; GO:0005739; GO:0005777; GO:0005829; GO:0006635; GO:0006637; GO:0016509; GO:0016863; GO:0019899	R-MMU-390247;R-MMU-9033241;	mmu:74147;	17.0613	17.0991	17.0876	17.0448	17.1917	17.6593	17.4414	17.4004	17.4416	17.4227
Zc2hc1a_Q8BJH1	-1.25557	-0.686482	-0.708198	-0.652317	-1.17309	1.05415	1.25581	0.861241	0.223134	1.08132	Zc2hc1a	Zinc finger C2HC domain-containing protein 1A	Q8BJH1	1.02314	8.81952e-05	0.0040431	-0.334335	sp|Q8BJH1|ZC21A_MOUSE Zinc finger C2HC domain-containing protein 1A OS=Mus musculus OX=10090 GN=Zc2hc1a PE=1 SV=1					metal ion binding [GO:0046872]		GO:0046872		mmu:67306;	14.3823	14.4886	14.4845	14.495	14.3977	14.8137	14.8513	14.7776	14.6585	14.8187
Hacl1_Q9QXE0	-0.914252	-0.677292	-0.34664	-1.33172	-1.07472	0.85496	1.02875	0.96165	0.109793	1.38947	Hacl1	2-hydroxyacyl-CoA lyase 1	Q9QXE0	1.02655	8.90325e-05	0.0040431	-0.418549	sp|Q9QXE0|HACL1_MOUSE 2-hydroxyacyl-CoA lyase 1 OS=Mus musculus OX=10090 GN=Hacl1 PE=1 SV=2	FUNCTION: Peroxisomal 2-OH acyl-CoA lyase involved in the cleavage (C1 removal) reaction in the fatty acid alpha-oxydation in a thiamine pyrophosphate (TPP)-dependent manner (By similarity). Involved in the degradation of 3-methyl-branched fatty acids like phytanic acid and the shortening of 2-hydroxy long-chain fatty acids (By similarity). Plays a significant role in the biosynthesis of heptadec…	SUBCELLULAR LOCATION: Peroxisome {ECO:0000250|UniProtKB:Q9UJ83}.		fatty acid alpha-oxidation [GO:0001561]; fatty acid metabolic process [GO:0006631]; lipid metabolic process [GO:0006629]; methyl-branched fatty acid metabolic process [GO:0097089]; phytanic acid metabolic process [GO:1903512]; protein targeting to peroxisome [GO:0006625]	ATP binding [GO:0005524]; carbon-carbon lyase activity [GO:0016830]; identical protein binding [GO:0042802]; lyase activity [GO:0016829]; magnesium ion binding [GO:0000287]; thiamine pyrophosphate binding [GO:0030976]	intracellular membrane-bounded organelle [GO:0043231]; nucleoplasm [GO:0005654]; peroxisome [GO:0005777]	GO:0000287; GO:0001561; GO:0005524; GO:0005654; GO:0005777; GO:0006625; GO:0006629; GO:0006631; GO:0016829; GO:0016830; GO:0030976; GO:0042802; GO:0043231; GO:0097089; GO:1903512	R-MMU-389599;R-MMU-9033241;	mmu:56794;	15.755	15.8121	15.8917	15.6545	15.7164	16.1811	16.223	16.2068	16.0017	16.3099
Maoa_Q64133	-1.3331	-0.543572	-0.276804	-1.09603	-1.13635	0.730221	1.45668	0.531379	0.956775	0.7108	Maoa	Amine oxidase [flavin-containing] A	Q64133	1.02182	8.92715e-05	0.0040431	-0.384099	sp|Q64133|AOFA_MOUSE Amine oxidase [flavin-containing] A OS=Mus musculus OX=10090 GN=Maoa PE=1 SV=3	FUNCTION: Catalyzes the oxidative deamination of biogenic and xenobiotic amines and has important functions in the metabolism of neuroactive and vasoactive amines in the central nervous system and peripheral tissues. MAOA preferentially oxidizes biogenic amines such as 5-hydroxytryptamine (5-HT), norepinephrine and epinephrine (By similarity). {ECO:0000250}.	SUBCELLULAR LOCATION: Mitochondrion outer membrane; Single-pass type IV membrane protein; Cytoplasmic side.		dopamine catabolic process [GO:0042420]; neurotransmitter catabolic process [GO:0042135]; phenylethylamine metabolic process [GO:0042443]; positive regulation of signal transduction [GO:0009967]; serotonin metabolic process [GO:0042428]	flavin adenine dinucleotide binding [GO:0050660]; primary amine oxidase activity [GO:0008131]; serotonin binding [GO:0051378]	cytosol [GO:0005829]; integral component of membrane [GO:0016021]; mitochondrial outer membrane [GO:0005741]; mitochondrion [GO:0005739]	GO:0005739; GO:0005741; GO:0005829; GO:0008131; GO:0009967; GO:0016021; GO:0042135; GO:0042420; GO:0042428; GO:0042443; GO:0050660; GO:0051378	R-MMU-141333;R-MMU-181430;R-MMU-379397;R-MMU-379398;R-MMU-380612;	mmu:17161;	17.5063	17.6792	17.7376	17.5582	17.5494	17.9581	18.1171	17.9145	18.0077	17.9538
Fundc2_Q9D6K8	-1.05954	-0.845755	-0.604253	-1.21804	-0.68961	0.845246	1.31694	1.36867	0.195241	0.691102	Fundc2	FUN14 domain-containing protein 2	Q9D6K8	1.02472	8.93395e-05	0.0040431	-0.363524	sp|Q9D6K8|FUND2_MOUSE FUN14 domain-containing protein 2 OS=Mus musculus OX=10090 GN=Fundc2 PE=1 SV=1				autophagy of mitochondrion [GO:0000422]		integral component of mitochondrial outer membrane [GO:0031307]; mitochondrion [GO:0005739]	GO:0000422; GO:0005739; GO:0031307		mmu:67391;	14.67	14.714	14.7637	14.6374	14.7461	15.0619	15.159	15.1696	14.9282	15.0302
Reep5_Q60870	-1.33364	-0.596267	-0.435178	-1.26754	-0.697838	1.39483	0.862913	0.986287	0.137163	0.949267	Reep5	Receptor expression-enhancing protein 5	Q60870	1.0256	8.98648e-05	0.0040431	-0.431581	sp|Q60870|REEP5_MOUSE Receptor expression-enhancing protein 5 OS=Mus musculus OX=10090 GN=Reep5 PE=1 SV=1	FUNCTION: May promote functional cell surface expression of olfactory receptors. {ECO:0000250}.	SUBCELLULAR LOCATION: Membrane {ECO:0000255}; Multi-pass membrane protein {ECO:0000255}. Endoplasmic reticulum {ECO:0000269|PubMed:24668814}. Note=Localizes to endoplasmic reticulum tubular network. {ECO:0000269|PubMed:24668814}.				endoplasmic reticulum tubular network [GO:0071782]; integral component of membrane [GO:0016021]	GO:0016021; GO:0071782	R-MMU-381753;		16.7432	16.927	16.9671	16.7597	16.9017	17.423	17.2905	17.3213	17.1097	17.312
Shank3_Q4ACU6	-0.577557	-1.27269	-1.19945	-0.909514	-0.383072	1.22643	0.925657	1.10264	0.0611554	1.02641	Shank3	SH3 and multiple ankyrin repeat domains protein 3	Q4ACU6	1.02877	9.0988e-05	0.00405675	-0.418055	sp|Q4ACU6|SHAN3_MOUSE SH3 and multiple ankyrin repeat domains protein 3 OS=Mus musculus OX=10090 GN=Shank3 PE=1 SV=3	FUNCTION: Major scaffold postsynaptic density protein which interacts with multiple proteins and complexes to orchestrate the dendritic spine and synapse formation, maturation and maintenance. Interconnects receptors of the postsynaptic membrane including NMDA-type and metabotropic glutamate receptors via complexes with GKAP/PSD-95 and HOMER, respectively, and the actin-based cytoskeleton. Plays …	SUBCELLULAR LOCATION: Cytoplasm. Cell junction, synapse. Cell junction, synapse, postsynaptic density. Cell projection, dendritic spine {ECO:0000250}. Note=In neuronal cells, extends into the region subjacent to the postsynaptic density (PSD).		adult behavior [GO:0030534]; AMPA glutamate receptor clustering [GO:0097113]; brain morphogenesis [GO:0048854]; dendritic spine morphogenesis [GO:0060997]; embryonic epithelial tube formation [GO:0001838]; exploration behavior [GO:0035640]; guanylate kinase-associated protein clustering [GO:0097117]; learning [GO:0007612]; learning or memory [GO:0007611]; locomotion [GO:0040011]; locomotory behav…	actin binding [GO:0003779]; identical protein binding [GO:0042802]; ionotropic glutamate receptor binding [GO:0035255]; protein-containing complex binding [GO:0044877]; protein C-terminus binding [GO:0008022]; protein self-association [GO:0043621]; scaffold protein binding [GO:0097110]; SH3 domain binding [GO:0017124]; signaling receptor complex adaptor activity [GO:0030159]; structural constitue…	ciliary membrane [GO:0060170]; cytoplasm [GO:0005737]; dendrite [GO:0030425]; dendritic spine [GO:0043197]; excitatory synapse [GO:0060076]; extrinsic component of cytoplasmic side of plasma membrane [GO:0031234]; glutamatergic synapse [GO:0098978]; neuron projection [GO:0043005]; neuron spine [GO:0044309]; postsynaptic density [GO:0014069]; synapse [GO:0045202]	GO:0000165; GO:0001838; GO:0003779; GO:0005737; GO:0007416; GO:0007611; GO:0007612; GO:0007613; GO:0007626; GO:0008022; GO:0008270; GO:0014069; GO:0017124; GO:0021773; GO:0030159; GO:0030160; GO:0030425; GO:0030534; GO:0031234; GO:0032232; GO:0035176; GO:0035255; GO:0035640; GO:0035641; GO:0040011; GO:0042297; GO:0042802; GO:0043005; GO:0043197; GO:0043621; GO:0044309; GO:0044877; GO:0045202; GO:…	R-MMU-6794361;R-MMU-8853659;	mmu:58234;	14.5991	14.4318	14.4494	14.5192	14.6459	15.0333	14.9609	15.0035	14.7529	14.9852
Pik3c3_Q6PF93	-0.904895	-0.961372	-0.836015	-0.431105	-1.04024	0.669841	1.94238	0.908549	0.20409	0.448767	Pik3c3	Phosphatidylinositol 3-kinase catalytic subunit type 3	Q6PF93	1.06469	9.18405e-05	0.0040582	-0.964247	sp|Q6PF93|PK3C3_MOUSE Phosphatidylinositol 3-kinase catalytic subunit type 3 OS=Mus musculus OX=10090 GN=Pik3c3 PE=1 SV=1	FUNCTION: Catalytic subunit of the PI3K complex that mediates formation of phosphatidylinositol 3-phosphate; different complex forms are believed to play a role in multiple membrane trafficking pathways: PI3KC3-C1 is involved in initiation of autophagosomes and PI3KC3-C2 in maturation of autophagosomes and endocytosis. Involved in regulation of degradative endocytic trafficking and required for t…	SUBCELLULAR LOCATION: Midbody {ECO:0000250|UniProtKB:Q8NEB9}. Late endosome {ECO:0000250|UniProtKB:Q8NEB9}. Cytoplasmic vesicle, autophagosome {ECO:0000250|UniProtKB:Q8NEB9}. Note=As component of the PI3K complex I localized to pre-autophagosome structures. As component of the PI3K complex II localized predominantly to endosomes (By similarity). Localizes also to discrete punctae along the ciliar…		autophagosome assembly [GO:0000045]; autophagy [GO:0006914]; autophagy of peroxisome [GO:0030242]; cell cycle [GO:0007049]; cell division [GO:0051301]; cellular response to glucose starvation [GO:0042149]; cellular response to starvation [GO:0009267]; early endosome to late endosome transport [GO:0045022]; endocytosis [GO:0006897]; endosome organization [GO:0007032]; macroautophagy [GO:0016236]; …	1-phosphatidylinositol-3-kinase activity [GO:0016303]; ATP binding [GO:0005524]; kinase activity [GO:0016301]; phosphatidylinositol 3-kinase activity [GO:0035004]; phosphatidylinositol kinase activity [GO:0052742]; protein kinase activity [GO:0004672]	autolysosome [GO:0044754]; cytoplasm [GO:0005737]; cytosol [GO:0005829]; endosome [GO:0005768]; late endosome [GO:0005770]; membrane [GO:0016020]; midbody [GO:0030496]; peroxisome [GO:0005777]; phagocytic vesicle [GO:0045335]; phagophore assembly site [GO:0000407]; phosphatidylinositol 3-kinase complex, class III [GO:0035032]; phosphatidylinositol 3-kinase complex, class III, type I [GO:0034271];…	GO:0000045; GO:0000407; GO:0004672; GO:0005524; GO:0005737; GO:0005768; GO:0005770; GO:0005777; GO:0005829; GO:0006468; GO:0006497; GO:0006897; GO:0006914; GO:0007032; GO:0007049; GO:0009267; GO:0016020; GO:0016236; GO:0016301; GO:0016303; GO:0016485; GO:0030242; GO:0030496; GO:0032465; GO:0034271; GO:0034272; GO:0034497; GO:0035004; GO:0035032; GO:0036092; GO:0042149; GO:0043201; GO:0044754; GO:…	R-MMU-109704;R-MMU-1632852;R-MMU-1660514;R-MMU-1660516;R-MMU-1660517;R-MMU-168138;R-MMU-5668599;	mmu:225326;	14.8661	14.8335	14.9059	15.1397	14.7879	15.7756	16.5106	15.9135	15.5066	15.6479
Cfl2_P45591	-1.26576	-0.316513	-0.751465	-1.33884	-0.640134	1.2495	0.612791	1.25659	0.985696	0.208137	Cfl2	Cofilin-2	P45591	1.02807	9.50523e-05	0.00411679	-0.44314	sp|P45591|COF2_MOUSE Cofilin-2 OS=Mus musculus OX=10090 GN=Cfl2 PE=1 SV=1	FUNCTION: Controls reversibly actin polymerization and depolymerization in a pH-sensitive manner. It has the ability to bind G- and F-actin in a 1:1 ratio of cofilin to actin. It is the major component of intranuclear and cytoplasmic actin rods. Required for muscle maintenance. May play a role during the exchange of alpha-actin forms during the early postnatal remodeling of the sarcomere. {ECO:00…	SUBCELLULAR LOCATION: Nucleus matrix. Cytoplasm, cytoskeleton. Note=Colocalizes with CSPR3 in the Z line of sarcomeres. {ECO:0000250|UniProtKB:Q9Y281}.		actin filament depolymerization [GO:0030042]; actin filament fragmentation [GO:0030043]; actin filament organization [GO:0007015]; actin filament severing [GO:0051014]; cell motility [GO:0048870]; muscle cell cellular homeostasis [GO:0046716]; positive regulation of actin filament depolymerization [GO:0030836]; sarcomere organization [GO:0045214]; skeletal muscle tissue development [GO:0007519]	actin filament binding [GO:0051015]	actin cytoskeleton [GO:0015629]; cortical actin cytoskeleton [GO:0030864]; cytoplasm [GO:0005737]; I band [GO:0031674]; nuclear matrix [GO:0016363]; Z disc [GO:0030018]	GO:0005737; GO:0007015; GO:0007519; GO:0015629; GO:0016363; GO:0030018; GO:0030042; GO:0030043; GO:0030836; GO:0030864; GO:0031674; GO:0045214; GO:0046716; GO:0048870; GO:0051014; GO:0051015		mmu:12632;	15.6832	15.927	15.8153	15.6644	15.8439	16.3293	16.1658	16.3311	16.2615	16.0618
Serpina1a_P07758	-0.556309	-1.00184	-0.190156	-0.925153	-1.55242	0.907785	1.02832	0.770286	1.37436	0.145118	Serpina1a	Alpha-1-antitrypsin 1-1	P07758	1.029	9.53454e-05	0.00411679	-0.606944	sp|P07758|A1AT1_MOUSE Alpha-1-antitrypsin 1-1 OS=Mus musculus OX=10090 GN=Serpina1a PE=1 SV=4	FUNCTION: Inhibitor of serine proteases. Its primary target is elastase, but it also has a moderate affinity for plasmin and thrombin. {ECO:0000269|PubMed:11961105, ECO:0000269|PubMed:8619829}.	SUBCELLULAR LOCATION: Secreted {ECO:0000269|PubMed:11961105, ECO:0000269|PubMed:8619829}.		acute-phase response [GO:0006953]; negative regulation of endopeptidase activity [GO:0010951]; protein N-linked glycosylation [GO:0006487]; response to cytokine [GO:0034097]; response to peptide hormone [GO:0043434]	endopeptidase inhibitor activity [GO:0004866]; identical protein binding [GO:0042802]; protease binding [GO:0002020]; serine-type endopeptidase inhibitor activity [GO:0004867]	collagen-containing extracellular matrix [GO:0062023]; endoplasmic reticulum [GO:0005783]; extracellular region [GO:0005576]; extracellular space [GO:0005615]; Golgi apparatus [GO:0005794]; intracellular membrane-bounded organelle [GO:0043231]	GO:0002020; GO:0004866; GO:0004867; GO:0005576; GO:0005615; GO:0005783; GO:0005794; GO:0006487; GO:0006953; GO:0010951; GO:0034097; GO:0042802; GO:0043231; GO:0043434; GO:0062023		mmu:20700;	21.0321	20.8722	21.1636	20.8997	20.6745	21.5578	21.6011	21.5085	21.7254	21.284
Map3k5_O35099	-0.36465	-0.570806	-0.299912	-1.22876	-1.69462	1.0558	1.07112	1.13016	0.699711	0.201953	Map3k5	Mitogen-activated protein kinase kinase kinase 5	O35099	1.07323	9.5662e-05	0.00411679	-1.13465	sp|O35099|M3K5_MOUSE Mitogen-activated protein kinase kinase kinase 5 OS=Mus musculus OX=10090 GN=Map3k5 PE=1 SV=3	FUNCTION: Serine/threonine kinase which acts as an essential component of the MAP kinase signal transduction pathway. Plays an important role in the cascades of cellular responses evoked by changes in the environment. Mediates signaling for determination of cell fate such as differentiation and survival. Plays a crucial role in the apoptosis signal transduction pathway through mitochondria-depend…	SUBCELLULAR LOCATION: Cytoplasm {ECO:0000250|UniProtKB:Q99683}. Endoplasmic reticulum {ECO:0000250}. Note=Interaction with 14-3-3 proteins alters the distribution of MAP3K5/ASK1 and restricts it to the perinuclear endoplasmic reticulum region. {ECO:0000250}.		activation of MAPK activity [GO:0000187]; activation of MAPKK activity [GO:0000186]; cellular response to amino acid starvation [GO:0034198]; cellular response to hydrogen peroxide [GO:0070301]; cellular response to reactive nitrogen species [GO:1902170]; cellular response to tumor necrosis factor [GO:0071356]; endothelial cell apoptotic process [GO:0072577]; innate immune response [GO:0045087]; …	ATP binding [GO:0005524]; identical protein binding [GO:0042802]; magnesium ion binding [GO:0000287]; MAP kinase kinase kinase activity [GO:0004709]; protein domain specific binding [GO:0019904]; protein homodimerization activity [GO:0042803]; protein kinase activity [GO:0004672]; protein kinase binding [GO:0019901]; protein phosphatase binding [GO:0019903]	cytoplasm [GO:0005737]; cytosol [GO:0005829]; external side of plasma membrane [GO:0009897]; IRE1-TRAF2-ASK1 complex [GO:1990604]; protein-containing complex [GO:0032991]; protein kinase complex [GO:1902911]	GO:0000165; GO:0000186; GO:0000187; GO:0000287; GO:0001934; GO:0002931; GO:0004672; GO:0004709; GO:0005524; GO:0005737; GO:0005829; GO:0006468; GO:0007254; GO:0008631; GO:0009897; GO:0010666; GO:0010941; GO:0019901; GO:0019903; GO:0019904; GO:0032991; GO:0034198; GO:0034976; GO:0038066; GO:0042060; GO:0042802; GO:0042803; GO:0043065; GO:0043280; GO:0043507; GO:0045087; GO:0045663; GO:0045893; GO:…	R-MMU-2559580;	mmu:26408;	15.814	15.6734	15.8581	15.2246	14.9068	16.7829	16.7933	16.8336	16.54	16.2005
Aspa_Q8R3P0	-0.427889	-1.17677	-1.26964	-0.656848	-0.848915	1.01364	1.55399	0.853862	0.342967	0.615604	Aspa	Aspartoacylase	Q8R3P0	1.02481	9.73025e-05	0.00414116	-0.379881	sp|Q8R3P0|ACY2_MOUSE Aspartoacylase OS=Mus musculus OX=10090 GN=Aspa PE=1 SV=2	FUNCTION: Catalyzes the deacetylation of N-acetylaspartic acid (NAA) to produce acetate and L-aspartate. NAA occurs in high concentration in brain and its hydrolysis NAA plays a significant part in the maintenance of intact white matter (By similarity). {ECO:0000250}.	SUBCELLULAR LOCATION: Cytoplasm. Nucleus {ECO:0000250}.		acetate metabolic process [GO:0006083]; central nervous system myelination [GO:0022010]; positive regulation of oligodendrocyte differentiation [GO:0048714]	aminoacylase activity [GO:0004046]; aspartoacylase activity [GO:0019807]; hydrolase activity, acting on carbon-nitrogen (but not peptide) bonds, in linear amides [GO:0016811]; hydrolase activity, acting on ester bonds [GO:0016788]; identical protein binding [GO:0042802]; metal ion binding [GO:0046872]	cytoplasm [GO:0005737]; cytosol [GO:0005829]; nucleus [GO:0005634]	GO:0004046; GO:0005634; GO:0005737; GO:0005829; GO:0006083; GO:0016788; GO:0016811; GO:0019807; GO:0022010; GO:0042802; GO:0046872; GO:0048714	R-MMU-8963693;	mmu:11484;	15.4063	15.2439	15.2238	15.3567	15.315	15.7189	15.836	15.6842	15.5734	15.6326
Dfna5_Q9Z2D3	-1.26856	-0.640028	-0.331003	-0.986901	-0.985246	1.28832	0.820965	1.22745	-0.155651	1.03066	Dfna5	Non-syndromic hearing impairment protein 5 homolog	Q9Z2D3	1.04527	9.84152e-05	0.00414116	-0.642426	sp|Q9Z2D3|GSDME_MOUSE Gasdermin-E OS=Mus musculus OX=10090 GN=Gsdme PE=1 SV=1	FUNCTION: [Gasdermin-E]: Precursor of a pore-forming protein that converts non-inflammatory apoptosis to pyroptosis. This form constitutes the precursor of the pore-forming protein: upon cleavage, the released N-terminal moiety (Gasdermin-E, N-terminal) binds to membranes and forms pores, triggering pyroptosis. {ECO:0000250|UniProtKB:O60443}.; FUNCTION: [Gasdermin-E, N-terminal]: Pore-forming pro…	SUBCELLULAR LOCATION: [Gasdermin-E, N-terminal]: Cell membrane {ECO:0000250|UniProtKB:O60443}; Multi-pass membrane protein {ECO:0000250|UniProtKB:Q5Y4Y6}.; SUBCELLULAR LOCATION: [Gasdermin-E]: Cytoplasm, cytosol {ECO:0000250|UniProtKB:O60443}.		cell death [GO:0008219]; cellular response to tumor necrosis factor [GO:0071356]; cellular response to virus [GO:0098586]; granzyme-mediated programmed cell death signaling pathway [GO:0140507]; inner ear receptor cell differentiation [GO:0060113]; necrotic cell death [GO:0070265]; negative regulation of cell population proliferation [GO:0008285]; positive regulation of immune response to tumor c…	cardiolipin binding [GO:1901612]; phosphatidylinositol-4,5-bisphosphate binding [GO:0005546]; wide pore channel activity [GO:0022829]	cytoplasm [GO:0005737]; cytosol [GO:0005829]; integral component of membrane [GO:0016021]; membrane [GO:0016020]; plasma membrane [GO:0005886]	GO:0002839; GO:0005546; GO:0005737; GO:0005829; GO:0005886; GO:0007605; GO:0008219; GO:0008285; GO:0016020; GO:0016021; GO:0022829; GO:0043410; GO:0060113; GO:0070265; GO:0070269; GO:0071356; GO:0098586; GO:0140507; GO:1901612; GO:2001244		mmu:54722;	14.0282	14.2679	14.3857	14.1356	14.1362	15.0032	14.825	14.98	14.4526	14.9049
Nif3l1_Q9EQ80	-0.890201	-0.907687	-1.49944	-0.615514	-0.375244	0.692209	1.28427	1.44297	0.55206	0.316577	Nif3l1	NIF3-like protein 1	Q9EQ80	1.02858	9.87386e-05	0.00414116	-0.468136	sp|Q9EQ80|NIF3L_MOUSE NIF3-like protein 1 OS=Mus musculus OX=10090 GN=Nif3l1 PE=1 SV=4	FUNCTION: May function as a transcriptional corepressor through its interaction with COPS2, negatively regulating the expression of genes involved in neuronal differentiation. {ECO:0000269|PubMed:12522100}.	SUBCELLULAR LOCATION: Cytoplasm {ECO:0000269|PubMed:12522100}. Nucleus {ECO:0000269|PubMed:12522100}. Note=Interaction with COPS2 may regulate localization to the nucleus. {ECO:0000269|PubMed:12522100}.		negative regulation of nucleic acid-templated transcription [GO:1903507]; neuron differentiation [GO:0030182]; positive regulation of transcription, DNA-templated [GO:0045893]	identical protein binding [GO:0042802]; transcription factor binding [GO:0008134]	cytoplasm [GO:0005737]; mitochondrion [GO:0005739]; nucleus [GO:0005634]	GO:0005634; GO:0005737; GO:0005739; GO:0008134; GO:0030182; GO:0042802; GO:0045893; GO:1903507		mmu:65102;	16.369	16.3642	16.2027	16.444	16.5095	16.8009	16.9625	17.0058	16.7626	16.6983
Mta1_Q8K4B0	-0.194113	-0.958434	-1.00685	-0.341459	-1.66806	0.615849	1.52472	0.866027	0.554262	0.608053	Mta1	Metastasis-associated protein MTA1	Q8K4B0	1.07242	0.000100977	0.00414905	-0.888007	sp|Q8K4B0|MTA1_MOUSE Metastasis-associated protein MTA1 OS=Mus musculus OX=10090 GN=Mta1 PE=1 SV=1	FUNCTION: Transcriptional coregulator which can act as both a transcriptional corepressor and coactivator. As a part of the histone-deacetylase multiprotein complex (NuRD), regulates transcription of its targets by modifying the acetylation status of the target chromatin and cofactor accessibility to the target DNA. In conjunction with other components of NuRD, acts as a transcriptional corepress…	SUBCELLULAR LOCATION: Nucleus. Nucleus envelope {ECO:0000255|PROSITE-ProRule:PRU00512, ECO:0000255|PROSITE-ProRule:PRU00624}. Cytoplasm. Cytoplasm, cytoskeleton {ECO:0000250}. Note=Associated with microtubules. Primarily localized in the cytoplasm in embryonic tissues. Localization at the nuclear envelope is TPR-dependent.		circadian regulation of gene expression [GO:0032922]; double-strand break repair [GO:0006302]; entrainment of circadian clock by photoperiod [GO:0043153]; histone deacetylation [GO:0016575]; locomotor rhythm [GO:0045475]; negative regulation of transcription by RNA polymerase II [GO:0000122]; positive regulation of protein autoubiquitination [GO:1902499]; proteasome-mediated ubiquitin-dependent p…	chromatin binding [GO:0003682]; enzyme binding [GO:0019899]; histone deacetylase binding [GO:0042826]; RNA polymerase II cis-regulatory region sequence-specific DNA binding [GO:0000978]; RNA polymerase II repressing transcription factor binding [GO:0001103]; transcription coactivator activity [GO:0003713]; transcription corepressor activity [GO:0003714]; zinc ion binding [GO:0008270]	cytoplasm [GO:0005737]; cytosol [GO:0005829]; endoplasmic reticulum [GO:0005783]; Golgi apparatus [GO:0005794]; intracellular membrane-bounded organelle [GO:0043231]; microtubule [GO:0005874]; nuclear envelope [GO:0005635]; nucleoplasm [GO:0005654]; nucleus [GO:0005634]; NuRD complex [GO:0016581]	GO:0000122; GO:0000978; GO:0001103; GO:0003682; GO:0003713; GO:0003714; GO:0005634; GO:0005635; GO:0005654; GO:0005737; GO:0005783; GO:0005794; GO:0005829; GO:0005874; GO:0006302; GO:0008270; GO:0010212; GO:0016575; GO:0016581; GO:0019899; GO:0032922; GO:0033363; GO:0040029; GO:0042826; GO:0043153; GO:0043161; GO:0043231; GO:0045475; GO:1902499	R-MMU-3214815;R-MMU-3232118;R-MMU-73762;R-MMU-8943724;		12.6029	12.1959	12.1701	12.5244	11.818	13.0342	13.5182	13.1674	13.0014	13.03
Dst_Q91ZU6	-1.3426	-0.861386	-1.14595	-0.731752	-0.34628	1.177	1.25327	0.683339	0.340829	0.97353	Dst	Dystonin	Q91ZU6	1.01933	0.000101757	0.00414905	-0.347366	sp|Q91ZU6|DYST_MOUSE Dystonin OS=Mus musculus OX=10090 GN=Dst PE=1 SV=2	FUNCTION: Cytoskeletal linker protein. Acts as an integrator of intermediate filaments, actin and microtubule cytoskeleton networks. Required for anchoring either intermediate filaments to the actin cytoskeleton in neural and muscle cells or keratin-containing intermediate filaments to hemidesmosomes in epithelial cells. The proteins may self-aggregate to form filaments or a two-dimensional mesh.…	SUBCELLULAR LOCATION: Cytoplasm, cytoskeleton. Cytoplasm, cytoskeleton, stress fiber. Cell projection, axon {ECO:0000269|PubMed:17287360}. Note=Associates with axonal microtubules at the growing distal tip and intermediate filaments, but not with actin cytoskeleton, in sensory neurons (By similarity). Associates with intermediate filaments, actin and microtubule cytoskeletons. Localizes to actin …		axonogenesis [GO:0007409]; cell adhesion [GO:0007155]; cytoplasmic microtubule organization [GO:0031122]; hemidesmosome assembly [GO:0031581]; intermediate filament cytoskeleton organization [GO:0045104]; intracellular transport [GO:0046907]; regulation of microtubule polymerization or depolymerization [GO:0031110]; retrograde axonal transport [GO:0008090]; wound healing [GO:0042060]	actin binding [GO:0003779]; calcium ion binding [GO:0005509]; microtubule binding [GO:0008017]; microtubule plus-end binding [GO:0051010]; protein homodimerization activity [GO:0042803]; structural molecule activity [GO:0005198]	actin cytoskeleton [GO:0015629]; axon [GO:0030424]; axon cytoplasm [GO:1904115]; cell cortex [GO:0005938]; cytoplasm [GO:0005737]; cytoplasmic side of plasma membrane [GO:0009898]; cytoplasmic vesicle [GO:0031410]; endoplasmic reticulum membrane [GO:0005789]; focal adhesion [GO:0005925]; hemidesmosome [GO:0030056]; H zone [GO:0031673]; integral component of membrane [GO:0016021]; intercalated dis…	GO:0001725; GO:0003779; GO:0005198; GO:0005509; GO:0005634; GO:0005635; GO:0005737; GO:0005789; GO:0005882; GO:0005925; GO:0005938; GO:0007155; GO:0007409; GO:0008017; GO:0008090; GO:0009898; GO:0014069; GO:0014704; GO:0015629; GO:0015630; GO:0016020; GO:0016021; GO:0030018; GO:0030056; GO:0030424; GO:0031110; GO:0031122; GO:0031410; GO:0031581; GO:0031673; GO:0035371; GO:0042060; GO:0042383; GO:…	R-MMU-2022090;R-MMU-446107;	mmu:13518;	17.8852	17.9796	17.9238	18.005	18.0806	18.3793	18.3943	18.2825	18.2154	18.3394
Wfs1_P56695	-1.24314	-0.666276	-0.260328	-1.22274	-0.843081	0.638383	1.70771	0.738953	0.25484	0.895669	Wfs1	Wolframin	P56695	1.03794	0.000101977	0.00414905	-0.556826	sp|P56695|WFS1_MOUSE Wolframin OS=Mus musculus OX=10090 GN=Wfs1 PE=1 SV=1	FUNCTION: Participates in the regulation of cellular Ca(2+) homeostasis, at least partly, by modulating the filling state of the endoplasmic reticulum Ca(2+) store. {ECO:0000250}.	SUBCELLULAR LOCATION: Endoplasmic reticulum membrane; Multi-pass membrane protein.		calcium ion homeostasis [GO:0055074]; endoplasmic reticulum calcium ion homeostasis [GO:0032469]; endoplasmic reticulum unfolded protein response [GO:0030968]; glucose homeostasis [GO:0042593]; kidney development [GO:0001822]; negative regulation of ATF6-mediated unfolded protein response [GO:1903892]; negative regulation of DNA-binding transcription factor activity [GO:0043433]; negative regulat…	activating transcription factor binding [GO:0033613]; ATPase binding [GO:0051117]; calcium-dependent protein binding [GO:0048306]; calmodulin binding [GO:0005516]; proteasome binding [GO:0070628]; ubiquitin protein ligase binding [GO:0031625]	dendrite [GO:0030425]; endoplasmic reticulum [GO:0005783]; integral component of endoplasmic reticulum membrane [GO:0030176]; integral component of synaptic vesicle membrane [GO:0030285]	GO:0000122; GO:0001822; GO:0003091; GO:0005516; GO:0005783; GO:0007601; GO:0007605; GO:0030176; GO:0030285; GO:0030425; GO:0030433; GO:0030968; GO:0031016; GO:0031398; GO:0031625; GO:0032469; GO:0033613; GO:0034976; GO:0042048; GO:0042593; GO:0043069; GO:0043433; GO:0043524; GO:0045927; GO:0048306; GO:0050821; GO:0050877; GO:0051117; GO:0051247; GO:0051726; GO:0051928; GO:0055074; GO:0070628; GO:…	R-MMU-381426;R-MMU-8957275;	mmu:22393;	14.5465	14.736	14.8695	14.5532	14.6779	15.1648	15.5163	15.1979	15.0388	15.2494
Pxdn_Q3UQ28	-0.800959	-0.53975	-0.944612	-1.62877	-0.372155	1.46725	0.584954	0.958772	0.358308	0.916967	Pxdn	Peroxidasin homolog	Q3UQ28	1.02716	0.000103678	0.00414905	-0.461937	sp|Q3UQ28|PXDN_MOUSE Peroxidasin homolog OS=Mus musculus OX=10090 GN=Pxdn PE=1 SV=2	FUNCTION: Displays low peroxidase activity and is likely to participate in H(2)O(2) metabolism and peroxidative reactions in the cardiovascular system (By similarity). Plays a role in extracellular matrix formation. {ECO:0000250}.	SUBCELLULAR LOCATION: Secreted, extracellular space, extracellular matrix {ECO:0000269|PubMed:19590037}. Note=Enriched in the peritubular space of fibrotic kidneys.		collagen fibril organization [GO:0030199]; extracellular matrix organization [GO:0030198]; hydrogen peroxide catabolic process [GO:0042744]; oxidation-reduction process [GO:0055114]; response to oxidative stress [GO:0006979]	bromide peroxidase activity [GO:0019806]; extracellular matrix structural constituent [GO:0005201]; heme binding [GO:0020037]; metal ion binding [GO:0046872]; peroxidase activity [GO:0004601]	collagen-containing extracellular matrix [GO:0062023]; endoplasmic reticulum [GO:0005783]; extracellular space [GO:0005615]	GO:0004601; GO:0005201; GO:0005615; GO:0005783; GO:0006979; GO:0019806; GO:0020037; GO:0030198; GO:0030199; GO:0042744; GO:0046872; GO:0055114; GO:0062023	R-MMU-2243919;	mmu:69675;	17.0222	17.0926	16.9835	16.7991	17.1377	17.6333	17.3956	17.4963	17.3345	17.485
Hectd1_Q69ZR2	-0.938006	-0.977304	-1.0112	-1.26347	-0.305354	0.948856	1.00559	1.35261	0.647971	0.540302	Hectd1	E3 ubiquitin-protein ligase HECTD1	Q69ZR2	1.01949	0.000103902	0.00414905	-0.316462	sp|Q69ZR2|HECD1_MOUSE E3 ubiquitin-protein ligase HECTD1 OS=Mus musculus OX=10090 GN=Hectd1 PE=1 SV=2	FUNCTION: E3 ubiquitin-protein ligase which accepts ubiquitin from an E2 ubiquitin-conjugating enzyme in the form of a thioester and then directly transfers the ubiquitin to targeted substrates (PubMed:22431752). Mediates 'Lys-63'-linked polyubiquitination of HSP90AA1 which leads to its intracellular localization and reduced secretion (PubMed:22431752). Negatively regulating HSP90AA1 secretion in…			anatomical structure development [GO:0048856]; aorta development [GO:0035904]; embryonic placenta development [GO:0001892]; heart valve development [GO:0003170]; natural killer cell differentiation [GO:0001779]; negative regulation of protein localization to plasma membrane [GO:1903077]; neural tube closure [GO:0001843]; protein autoubiquitination [GO:0051865]; protein K63-linked ubiquitination […	metal ion binding [GO:0046872]; ubiquitin protein ligase activity [GO:0061630]		GO:0001779; GO:0001843; GO:0001892; GO:0003170; GO:0003281; GO:0035904; GO:0046872; GO:0048856; GO:0051865; GO:0060707; GO:0060708; GO:0061630; GO:0070534; GO:1903077	R-MMU-983168;		16.2333	16.2263	16.2204	16.176	16.3446	16.5653	16.5753	16.6364	16.5124	16.4934
Iars2_Q8BIJ6	-0.609325	-0.940898	-0.907246	-1.28914	-0.635414	1.379	1.18971	1.12943	0.460647	0.223235	Iars2	Isoleucine--tRNA ligase, mitochondrial	Q8BIJ6	1.02077	0.000103957	0.00414905	-0.372324	sp|Q8BIJ6|SYIM_MOUSE Isoleucine--tRNA ligase, mitochondrial OS=Mus musculus OX=10090 GN=Iars2 PE=1 SV=1		SUBCELLULAR LOCATION: Mitochondrion matrix {ECO:0000250}.		isoleucyl-tRNA aminoacylation [GO:0006428]; mitochondrial translation [GO:0032543]	aminoacyl-tRNA editing activity [GO:0002161]; ATP binding [GO:0005524]; isoleucine-tRNA ligase activity [GO:0004822]; tRNA binding [GO:0000049]	cytosol [GO:0005829]; mitochondrial matrix [GO:0005759]; mitochondrion [GO:0005739]	GO:0000049; GO:0002161; GO:0004822; GO:0005524; GO:0005739; GO:0005759; GO:0005829; GO:0006428; GO:0032543		mmu:381314;	17.9832	17.9128	17.9199	17.8388	17.9776	18.4055	18.3653	18.3525	18.2105	18.16
Creld1_Q91XD7	-0.834489	-0.430209	-0.685289	-1.2028	-1.11542	1.30985	0.939118	1.13412	-0.141584	1.0267	Creld1	Cysteine-rich with EGF-like domain protein 1	Q91XD7	1.03147	0.00010615	0.0041586	-0.483515	sp|Q91XD7|CREL1_MOUSE Cysteine-rich with EGF-like domain protein 1 OS=Mus musculus OX=10090 GN=Creld1 PE=1 SV=1	FUNCTION: Protein disulfide isomerase (By similarity). Promotes the localization of acetylcholine receptors (AChRs) to the plasma membrane (PubMed:30407909). {ECO:0000250|UniProtKB:Q9CYA0, ECO:0000269|PubMed:30407909}.	SUBCELLULAR LOCATION: Membrane {ECO:0000305}; Multi-pass membrane protein {ECO:0000305}.			calcium ion binding [GO:0005509]; protein disulfide isomerase activity [GO:0003756]	integral component of membrane [GO:0016021]	GO:0003756; GO:0005509; GO:0016021		mmu:171508;	15.3705	15.485	15.4127	15.2662	15.2909	15.9778	15.8728	15.928	15.5667	15.8976
Dus3l_Q91XI1	-0.481872	-0.888989	-0.740319	-1.3132	-0.755573	1.12517	1.27176	1.43892	-0.0738886	0.417993	Dus3l	tRNA-dihydrouridine(47) synthase [NAD(P)(+)]-like	Q91XI1	1.06145	0.00010662	0.0041586	-0.748008	sp|Q91XI1|DUS3L_MOUSE tRNA-dihydrouridine(47) synthase [NAD(P)(+)]-like OS=Mus musculus OX=10090 GN=Dus3l PE=1 SV=1	FUNCTION: Catalyzes the synthesis of dihydrouridine, a modified base found in the D-loop of most tRNAs. {ECO:0000250}.				flavin adenine dinucleotide binding [GO:0050660]; metal ion binding [GO:0046872]; tRNA dihydrouridine synthase activity [GO:0017150]		GO:0017150; GO:0046872; GO:0050660		mmu:224907;	12.3302	12.1481	12.2146	11.9583	12.2078	13.0492	13.1148	13.1896	12.5128	12.7328
_Q91V76	-0.948361	-0.605619	-0.497321	-1.41626	-1.00684	1.32819	1.04129	0.689535	0.441721	0.973664		Ester hydrolase C11orf54 homolog	Q91V76	1.0184	0.000106717	0.0041586	-0.323007	sp|Q91V76|CK054_MOUSE Ester hydrolase C11orf54 homolog OS=Mus musculus OX=10090 PE=1 SV=1	FUNCTION: Exhibits ester hydrolase activity on the substrate p-nitrophenyl acetate. {ECO:0000250}.	SUBCELLULAR LOCATION: Nucleus {ECO:0000250}.			hydrolase activity, acting on ester bonds [GO:0016788]; zinc ion binding [GO:0008270]	nuclear body [GO:0016604]; nucleoplasm [GO:0005654]; nucleus [GO:0005634]	GO:0005634; GO:0005654; GO:0008270; GO:0016604; GO:0016788		mmu:70984;	17.5452	17.6071	17.6266	17.4608	17.5347	17.9561	17.9043	17.8408	17.7961	17.8921
Fetub_Q9QXC1	-0.530132	-1.28038	-0.64028	-0.782258	-1.0371	1.30627	0.870863	1.43532	-0.0182384	0.675935	Fetub	Fetuin-B	Q9QXC1	1.02837	0.000107977	0.00416061	-0.477138	sp|Q9QXC1|FETUB_MOUSE Fetuin-B OS=Mus musculus OX=10090 GN=Fetub PE=1 SV=1	FUNCTION: Protease inhibitor required for egg fertilization. Required to prevent premature zona pellucida hardening before fertilization, probably by inhibiting the protease activity of ASTL, a protease that mediates the cleavage of ZP2 and triggers zona pellucida hardening. {ECO:0000269|PubMed:23562279}.	SUBCELLULAR LOCATION: Secreted {ECO:0000305|PubMed:23562279}.		binding of sperm to zona pellucida [GO:0007339]; negative regulation of endopeptidase activity [GO:0010951]; single fertilization [GO:0007338]	cysteine-type endopeptidase inhibitor activity [GO:0004869]; endopeptidase inhibitor activity [GO:0004866]; metalloendopeptidase inhibitor activity [GO:0008191]	extracellular region [GO:0005576]; extracellular space [GO:0005615]	GO:0004866; GO:0004869; GO:0005576; GO:0005615; GO:0007338; GO:0007339; GO:0008191; GO:0010951		mmu:59083;	16.91	16.7004	16.8793	16.8396	16.7684	17.423	17.3014	17.4591	17.053	17.2469
Ahcyl2_Q68FL4	-0.568876	-0.792026	-0.900421	-1.06569	-1.10787	1.56623	1.09915	0.814519	0.260009	0.694972	Ahcyl2	Putative adenosylhomocysteinase 3	Q68FL4	1.01942	0.00010845	0.00416061	-0.339303	sp|Q68FL4|SAHH3_MOUSE Putative adenosylhomocysteinase 3 OS=Mus musculus OX=10090 GN=Ahcyl2 PE=1 SV=1	FUNCTION: May regulate the electrogenic sodium/bicarbonate cotransporter SLC4A4 activity and Mg(2+)-sensitivity. On the contrary of its homolog AHCYL1, does not regulate ITPR1 sensitivity to inositol 1,4,5-trisphosphate. {ECO:0000250|UniProtKB:A6QLP2, ECO:0000250|UniProtKB:Q96HN2}.	SUBCELLULAR LOCATION: Cytoplasm {ECO:0000250|UniProtKB:A6QLP2, ECO:0000269|PubMed:19220705}. Microsome {ECO:0000269|PubMed:19220705}. Note=Associates with membranes when phosphorylated, probably through interaction with ITPR1. {ECO:0000269|PubMed:19220705}.		one-carbon metabolic process [GO:0006730]; S-adenosylmethionine cycle [GO:0033353]	hydrolase activity [GO:0016787]	cytosol [GO:0005829]; endoplasmic reticulum [GO:0005783]; intracellular membrane-bounded organelle [GO:0043231]; neuron projection [GO:0043005]	GO:0005783; GO:0005829; GO:0006730; GO:0016787; GO:0033353; GO:0043005; GO:0043231	R-MMU-425381;	mmu:74340;	17.5303	17.4876	17.4668	17.4352	17.4272	17.9386	17.8493	17.7949	17.6888	17.772
Ranbp10_Q6VN19	-0.7598	-0.660698	-0.564159	-1.01384	-1.36109	0.96598	1.18479	1.42492	0.629634	0.154269	Ranbp10	Ran-binding protein 10	Q6VN19	1.02926	0.000111256	0.00417481	-0.381144	sp|Q6VN19|RBP10_MOUSE Ran-binding protein 10 OS=Mus musculus OX=10090 GN=Ranbp10 PE=1 SV=2	FUNCTION: May act as an adapter protein to couple membrane receptors to intracellular signaling pathways (Probable). Core component of the CTLH E3 ubiquitin-protein ligase complex that selectively accepts ubiquitin from UBE2H and mediates ubiquitination and subsequent proteasomal degradation of the transcription factor HBP1 (By similarity). Enhances dihydrotestosterone-induced transactivation act…	SUBCELLULAR LOCATION: Cytoplasm {ECO:0000269|PubMed:18347012}. Nucleus {ECO:0000269|PubMed:18347012}. Note=Predominantly cytoplasmic. Associates with cytoplasmic microtubules in mature megakaryocytes and platelets.		cell surface receptor signaling pathway [GO:0007166]; cytoskeleton organization [GO:0007010]; microtubule cytoskeleton organization [GO:0000226]	beta-tubulin binding [GO:0048487]; Ran GTPase binding [GO:0008536]; Ran guanyl-nucleotide exchange factor activity [GO:0005087]	cytoplasm [GO:0005737]; microtubule cytoskeleton [GO:0015630]; nucleus [GO:0005634]; ubiquitin ligase complex [GO:0000151]	GO:0000151; GO:0000226; GO:0005087; GO:0005634; GO:0005737; GO:0007010; GO:0007166; GO:0008536; GO:0015630; GO:0048487	R-MMU-8851805;	mmu:74334;	13.0517	13.0733	13.0944	12.9961	12.9202	13.4289	13.4767	13.5292	13.3553	13.2514
Hspa14_Q99M31	-0.76443	-1.43022	-1.10877	-0.345292	-0.712279	1.11302	0.818995	1.46012	0.525209	0.443652	Hspa14	Heat shock 70 kDa protein 14	Q99M31	1.02707	0.000111341	0.00417481	-0.380069	sp|Q99M31|HSP7E_MOUSE Heat shock 70 kDa protein 14 OS=Mus musculus OX=10090 GN=Hspa14 PE=1 SV=2	FUNCTION: Component of the ribosome-associated complex (RAC), a complex involved in folding or maintaining nascent polypeptides in a folding-competent state. In the RAC complex, binds to the nascent polypeptide chain, while DNAJC2 stimulates its ATPase activity (By similarity). {ECO:0000250}.	SUBCELLULAR LOCATION: Cytoplasm, cytosol {ECO:0000250}.		cellular response to unfolded protein [GO:0034620]; chaperone cofactor-dependent protein refolding [GO:0051085]; protein refolding [GO:0042026]; response to unfolded protein [GO:0006986]; vesicle-mediated transport [GO:0016192]	ATPase activity [GO:0016887]; ATP binding [GO:0005524]; heat shock protein binding [GO:0031072]; misfolded protein binding [GO:0051787]; protein folding chaperone [GO:0044183]; unfolded protein binding [GO:0051082]	cytoplasm [GO:0005737]; cytosol [GO:0005829]; nucleus [GO:0005634]; plasma membrane [GO:0005886]; ribosome [GO:0005840]	GO:0005524; GO:0005634; GO:0005737; GO:0005829; GO:0005840; GO:0005886; GO:0006986; GO:0016192; GO:0016887; GO:0031072; GO:0034620; GO:0042026; GO:0044183; GO:0051082; GO:0051085; GO:0051787	R-MMU-3371453;	mmu:50497;	14.0658	13.9208	13.9908	14.1572	14.0772	14.4749	14.4108	14.5505	14.3468	14.3291
Hebp1_Q9R257	-1.2373	-0.315537	-0.694655	-1.41732	-0.547883	1.49937	0.503208	1.23329	0.290244	0.686589	Hebp1	Heme-binding protein 1	Q9R257	1.03554	0.000111351	0.00417481	-0.587933	sp|Q9R257|HEBP1_MOUSE Heme-binding protein 1 OS=Mus musculus OX=10090 GN=Hebp1 PE=1 SV=2	FUNCTION: May bind free porphyrinogens that may be present in the cell and thus facilitate removal of these potentially toxic compound. Binds with a high affinity to one molecule of heme or porphyrins. It binds metalloporphyrins, free porphyrins and N-methylprotoporphyrin with similar affinities. {ECO:0000269|PubMed:12413491, ECO:0000269|PubMed:16905545}.	SUBCELLULAR LOCATION: Cytoplasm {ECO:0000269|PubMed:12413491, ECO:0000269|PubMed:9813049}.		heme metabolic process [GO:0042168]	heme binding [GO:0020037]	cytoplasm [GO:0005737]; cytosol [GO:0005829]; mitochondrion [GO:0005739]	GO:0005737; GO:0005739; GO:0005829; GO:0020037; GO:0042168	R-MMU-418594;R-MMU-444473;	mmu:15199;	16.4035	16.7251	16.5928	16.3407	16.644	17.3583	17.0108	17.2655	16.9364	17.0747
Afm_O89020	-0.588707	-1.73243	-0.852798	-0.254894	-0.762407	0.706408	0.784725	1.58547	0.677516	0.437117	Afm	Afamin	O89020	1.04233	0.000113555	0.00420038	-0.652959	sp|O89020|AFAM_MOUSE Afamin OS=Mus musculus OX=10090 GN=Afm PE=1 SV=2	FUNCTION: Functions as carrier for hydrophobic molecules in body fluids. Essential for the solubility and activity of lipidated Wnt family members, including WNT1, WNT2B, WNT3, WNT3A, WNT5A, WNT7A, WNT7B, WNT8, WNT9A, WNT9B, WNT10A and WNT10B. Binds vitamin E. May transport vitamin E in body fluids under conditions where the lipoprotein system is not sufficient. May be involved in the transport o…	SUBCELLULAR LOCATION: Secreted {ECO:0000250|UniProtKB:P43652}.		protein stabilization [GO:0050821]; protein transport within extracellular region [GO:0071693]; vitamin transport [GO:0051180]	fatty acid binding [GO:0005504]; vitamin E binding [GO:0008431]; zinc ion binding [GO:0008270]	cytoplasm [GO:0005737]; extracellular space [GO:0005615]	GO:0005504; GO:0005615; GO:0005737; GO:0008270; GO:0008431; GO:0050821; GO:0051180; GO:0071693		mmu:280662;	15.5221	15.0767	15.4193	15.6522	15.4545	16.0266	16.0571	16.3689	16.0153	15.9217
Nemf_Q8CCP0	-0.582061	-0.756643	-1.05692	-1.13822	-0.792646	1.15732	1.42474	0.895629	-0.0835891	0.932398	Nemf	Nuclear export mediator factor Nemf	Q8CCP0	1.02506	0.000114496	0.00420038	-0.404082	sp|Q8CCP0|NEMF_MOUSE Nuclear export mediator factor Nemf OS=Mus musculus OX=10090 GN=Nemf PE=1 SV=2	FUNCTION: Component of the ribosome quality control complex (RQC), a ribosome-associated complex that mediates ubiquitination and extraction of incompletely synthesized nascent chains for proteasomal degradation. NEMF is responsible for selective recognition of stalled 60S subunits by recognizing an exposed, nascent chain-conjugated tRNA moiety. Nemf is important for the stable association of Ltn…	SUBCELLULAR LOCATION: Nucleus {ECO:0000305}.		nuclear export [GO:0051168]; rescue of stalled ribosome [GO:0072344]; ribosome-associated ubiquitin-dependent protein catabolic process [GO:1990116]	ribosomal large subunit binding [GO:0043023]; tRNA binding [GO:0000049]	nucleus [GO:0005634]; RQC complex [GO:1990112]	GO:0000049; GO:0005634; GO:0043023; GO:0051168; GO:0072344; GO:1990112; GO:1990116		mmu:66244;	16.1882	16.1474	16.0773	16.0584	16.139	16.5943	16.6568	16.5332	16.3046	16.5418
C2cd3_Q52KB6	-0.693802	-0.546619	-0.543252	-1.35893	-1.06666	0.974114	1.32188	1.03097	-0.188099	1.07039	C2cd3	C2 domain-containing protein 3	Q52KB6	1.03704	0.000114579	0.00420038	-0.587337	sp|Q52KB6|C2CD3_MOUSE C2 domain-containing protein 3 OS=Mus musculus OX=10090 GN=C2cd3 PE=1 SV=3	FUNCTION: Component of the centrioles that acts as a positive regulator of centriole elongation (PubMed:24997988). Promotes assembly of centriolar distal appendage, a structure at the distal end of the mother centriole that acts as an anchor of the cilium, and is required for recruitment of centriolar distal appendages proteins CEP83, SCLT1, CEP89, FBF1 and CEP164. Not required for centriolar sat…	SUBCELLULAR LOCATION: Cytoplasm, cytoskeleton, cilium basal body. Cytoplasm, cytoskeleton, microtubule organizing center, centrosome, centriole. Note=Localizes to centrioles and procentrioles both in interphase and mitosis. Localizes to centriolar satellites, localization is dependent on PCM1 and dynein-mediated retrograde transport. Also localizes to the distal ends of the mother and daughter ce…		brain development [GO:0007420]; centriole elongation [GO:0061511]; cilium assembly [GO:0060271]; embryonic digit morphogenesis [GO:0042733]; embryonic limb morphogenesis [GO:0030326]; heart looping [GO:0001947]; in utero embryonic development [GO:0001701]; neural plate axis specification [GO:0021997]; neural tube development [GO:0021915]; non-motile cilium assembly [GO:1905515]; pattern specifica…		centriolar satellite [GO:0034451]; centriole [GO:0005814]; centrosome [GO:0005813]; ciliary basal body [GO:0036064]; cytoplasm [GO:0005737]	GO:0001701; GO:0001947; GO:0005737; GO:0005813; GO:0005814; GO:0007389; GO:0007420; GO:0008589; GO:0016485; GO:0021915; GO:0021997; GO:0030162; GO:0030326; GO:0034451; GO:0036064; GO:0042733; GO:0060271; GO:0061511; GO:0071539; GO:1905515	R-MMU-5620912;	mmu:277939;	15.91	15.9614	15.9626	15.678	15.78	16.4919	16.6132	16.5117	16.0865	16.5255
Mfn2_Q80U63	-0.734434	-1.04942	-1.34895	-0.619453	-0.815359	0.762323	1.36322	0.929573	0.608448	0.904045	Mfn2	Mitofusin-2	Q80U63	1.01981	0.000115569	0.00420551	-0.288271	sp|Q80U63|MFN2_MOUSE Mitofusin-2 OS=Mus musculus OX=10090 GN=Mfn2 PE=1 SV=3	FUNCTION: Mitochondrial outer membrane GTPase that mediates mitochondrial clustering and fusion (PubMed:12527753, PubMed:23921378, PubMed:23620051). Mitochondria are highly dynamic organelles, and their morphology is determined by the equilibrium between mitochondrial fusion and fission events. Overexpression induces the formation of mitochondrial networks. Membrane clustering requires GTPase act…	SUBCELLULAR LOCATION: Mitochondrion outer membrane {ECO:0000250|UniProtKB:O95140}; Multi-pass membrane protein {ECO:0000250|UniProtKB:O95140}. Note=Colocalizes with BAX during apoptosis. {ECO:0000250|UniProtKB:O95140}.		apoptotic process [GO:0006915]; blastocyst formation [GO:0001825]; camera-type eye morphogenesis [GO:0048593]; mitochondrial fusion [GO:0008053]; mitochondrial membrane organization [GO:0007006]; mitochondrion localization [GO:0051646]; negative regulation of Ras protein signal transduction [GO:0046580]; negative regulation of smooth muscle cell proliferation [GO:0048662]; parkin-mediated stimula…	GTPase activity [GO:0003924]; GTPase binding [GO:0051020]; GTP binding [GO:0005525]; identical protein binding [GO:0042802]; proteoglycan binding [GO:0043394]; Ras GTPase binding [GO:0017016]; ubiquitin protein ligase binding [GO:0031625]	cytoplasm [GO:0005737]; cytosol [GO:0005829]; integral component of membrane [GO:0016021]; intrinsic component of mitochondrial outer membrane [GO:0031306]; microtubule cytoskeleton [GO:0015630]; mitochondrial outer membrane [GO:0005741]; mitochondrion [GO:0005739]	GO:0001825; GO:0003924; GO:0005525; GO:0005737; GO:0005739; GO:0005741; GO:0005829; GO:0006626; GO:0006915; GO:0006986; GO:0007006; GO:0008053; GO:0015630; GO:0016021; GO:0017016; GO:0031306; GO:0031625; GO:0034497; GO:0042802; GO:0043394; GO:0046580; GO:0048593; GO:0048662; GO:0051020; GO:0051646; GO:0061734; GO:0120162; GO:1904707; GO:1905461	R-MMU-5205685;R-MMU-983231;	mmu:170731;	14.5804	14.5307	14.4835	14.5986	14.5677	14.8166	14.9114	14.843	14.7923	14.8389
Dnajb4_Q9D832	-0.649815	-0.549089	-0.342966	-1.59069	-1.09857	1.3566	0.764859	1.21392	0.694167	0.201589	Dnajb4	DnaJ homolog subfamily B member 4	Q9D832	1.03483	0.000117765	0.00425415	-0.52539	sp|Q9D832|DNJB4_MOUSE DnaJ homolog subfamily B member 4 OS=Mus musculus OX=10090 GN=Dnajb4 PE=1 SV=1	FUNCTION: Probable chaperone. Stimulates ATP hydrolysis and the folding of unfolded proteins mediated by HSPA1A/B (in vitro). {ECO:0000250|UniProtKB:Q9UDY4}.	SUBCELLULAR LOCATION: Cytoplasm {ECO:0000250|UniProtKB:Q9UDY4}. Cell membrane {ECO:0000250|UniProtKB:Q9UDY4}.		chaperone cofactor-dependent protein refolding [GO:0051085]	ATPase activator activity [GO:0001671]; chaperone binding [GO:0051087]; unfolded protein binding [GO:0051082]	cytosol [GO:0005829]; nucleoplasm [GO:0005654]; plasma membrane [GO:0005886]	GO:0001671; GO:0005654; GO:0005829; GO:0005886; GO:0051082; GO:0051085; GO:0051087		mmu:67035;	15.1469	15.1781	15.2421	14.8548	15.0076	15.7697	15.586	15.7254	15.5641	15.4112
Mlycd_Q99J39	-1.17839	-0.921791	-0.610362	-1.08491	-0.510402	1.56506	0.848378	1.21814	0.148363	0.525899	Mlycd	Malonyl-CoA decarboxylase, mitochondrial	Q99J39	1.02678	0.000119851	0.00427101	-0.417246	sp|Q99J39|DCMC_MOUSE Malonyl-CoA decarboxylase, mitochondrial OS=Mus musculus OX=10090 GN=Mlycd PE=1 SV=1	FUNCTION: Catalyzes the conversion of malonyl-CoA to acetyl-CoA. In the fatty acid biosynthesis MCD selectively removes malonyl-CoA and thus assures that methyl-malonyl-CoA is the only chain elongating substrate for fatty acid synthase and that fatty acids with multiple methyl side chains are produced. In peroxisomes it may be involved in degrading intraperoxisomal malonyl-CoA, which is generated…	SUBCELLULAR LOCATION: Cytoplasm {ECO:0000250|UniProtKB:O95822}. Mitochondrion matrix {ECO:0000269|PubMed:23746352}. Peroxisome {ECO:0000250|UniProtKB:O95822}. Peroxisome matrix {ECO:0000250|UniProtKB:Q920F5}. Note=Enzymatically active in all three subcellular compartments. {ECO:0000250|UniProtKB:Q920F5}.		acetyl-CoA biosynthetic process [GO:0006085]; fatty acid biosynthetic process [GO:0006633]; fatty acid oxidation [GO:0019395]; malonyl-CoA catabolic process [GO:2001294]; positive regulation of fatty acid oxidation [GO:0046321]; regulation of fatty acid beta-oxidation [GO:0031998]; regulation of fatty acid oxidation [GO:0046320]; regulation of glucose metabolic process [GO:0010906]; response to i…	identical protein binding [GO:0042802]; malonyl-CoA decarboxylase activity [GO:0050080]	cytoplasm [GO:0005737]; cytosol [GO:0005829]; mitochondrial matrix [GO:0005759]; mitochondrion [GO:0005739]; peroxisomal matrix [GO:0005782]; peroxisome [GO:0005777]	GO:0002931; GO:0005737; GO:0005739; GO:0005759; GO:0005777; GO:0005782; GO:0005829; GO:0006085; GO:0006633; GO:0010906; GO:0019395; GO:0031998; GO:0042802; GO:0046320; GO:0046321; GO:0050080; GO:2001294	R-MMU-390247;R-MMU-9033241;	mmu:56690;	15.505	15.5671	15.6426	15.5276	15.6668	16.1696	15.996	16.0855	15.8264	15.9178
Pfkm_P47857	-1.2622	-0.851767	-1.03147	-0.928736	-0.291583	1.27941	0.538783	1.38269	0.306425	0.858442	Pfkm	ATP-dependent 6-phosphofructokinase, muscle type	P47857	1.02421	0.000119958	0.00427101	-0.369608	sp|P47857|PFKAM_MOUSE ATP-dependent 6-phosphofructokinase, muscle type OS=Mus musculus OX=10090 GN=Pfkm PE=1 SV=3	FUNCTION: Catalyzes the phosphorylation of D-fructose 6-phosphate to fructose 1,6-bisphosphate by ATP, the first committing step of glycolysis. {ECO:0000255|HAMAP-Rule:MF_03184, ECO:0000269|PubMed:19889946}.	SUBCELLULAR LOCATION: Cytoplasm {ECO:0000255|HAMAP-Rule:MF_03184}.; SUBCELLULAR LOCATION: [Isoform 2]: Cell projection, cilium, flagellum {ECO:0000269|PubMed:19889946}. Note=Principal piece region of the sperm flagellum. {ECO:0000269|PubMed:19889946}.; SUBCELLULAR LOCATION: [Isoform 3]: Cell projection, cilium, flagellum {ECO:0000269|PubMed:19889946}. Note=Principal piece region of the sperm flag…		canonical glycolysis [GO:0061621]; fructose 1,6-bisphosphate metabolic process [GO:0030388]; fructose 6-phosphate metabolic process [GO:0006002]; glucose catabolic process [GO:0006007]; glucose homeostasis [GO:0042593]; glycogen catabolic process [GO:0005980]; glycolysis from storage polysaccharide through glucose-1-phosphate [GO:0093001]; glycolytic process [GO:0006096]; glycolytic process throu…	6-phosphofructokinase activity [GO:0003872]; AMP binding [GO:0016208]; ATP binding [GO:0005524]; carbohydrate binding [GO:0030246]; fructose-6-phosphate binding [GO:0070095]; fructose binding [GO:0070061]; identical protein binding [GO:0042802]; kinase binding [GO:0019900]; metal ion binding [GO:0046872]; monosaccharide binding [GO:0048029]; phosphofructokinase activity [GO:0008443]; protein C-te…	6-phosphofructokinase complex [GO:0005945]; apical plasma membrane [GO:0016324]; cytosol [GO:0005829]; membrane [GO:0016020]; nucleus [GO:0005634]; sperm principal piece [GO:0097228]	GO:0003872; GO:0005524; GO:0005634; GO:0005829; GO:0005945; GO:0005980; GO:0006002; GO:0006007; GO:0006096; GO:0008022; GO:0008443; GO:0016020; GO:0016208; GO:0016324; GO:0019900; GO:0030246; GO:0030388; GO:0032024; GO:0042593; GO:0042802; GO:0045944; GO:0046716; GO:0046872; GO:0048029; GO:0051289; GO:0061615; GO:0061621; GO:0070061; GO:0070095; GO:0093001; GO:0097228	R-MMU-70171;	mmu:18642;	15.182	15.2689	15.2308	15.2526	15.3874	15.72	15.5632	15.7418	15.514	15.6309
Myo1d_Q5SYD0	-1.16853	-0.738089	-0.697304	-0.972282	-0.71386	1.32062	1.52582	0.548377	0.014622	0.880627	Myo1d	Unconventional myosin-Id	Q5SYD0	1.02758	0.00012091	0.00427416	-0.432279	sp|Q5SYD0|MYO1D_MOUSE Unconventional myosin-Id OS=Mus musculus OX=10090 GN=Myo1d PE=1 SV=1	FUNCTION: Unconventional myosin that functions as actin-based motor protein with ATPase activity (By similarity). Plays a role in endosomal protein trafficking, and especially in the transfer of cargo proteins from early to recycling endosomes (By similarity). Required for normal planar cell polarity in ciliated tracheal cells, for normal rotational polarity of cilia, and for coordinated, unidire…	SUBCELLULAR LOCATION: Cytoplasm {ECO:0000250|UniProtKB:Q63357}. Perikaryon {ECO:0000250|UniProtKB:Q63357}. Cell projection, dendrite {ECO:0000250|UniProtKB:Q63357}. Early endosome {ECO:0000250|UniProtKB:F1PRN2}. Cytoplasm, cell cortex {ECO:0000269|PubMed:20089841}. Basolateral cell membrane {ECO:0000269|PubMed:20089841}. Note=Colocalizes with the actin cytoskeleton in the cell cortex close to the…		actin filament organization [GO:0007015]; cellular localization [GO:0051641]; early endosome to recycling endosome transport [GO:0061502]; forebrain development [GO:0030900]; negative regulation of phosphatase activity [GO:0010923]; protein transport [GO:0015031]; vesicle transport along actin filament [GO:0030050]	actin-dependent ATPase activity [GO:0030898]; actin filament binding [GO:0051015]; ATP binding [GO:0005524]; calcium-dependent protein binding [GO:0048306]; calmodulin binding [GO:0005516]; microfilament motor activity [GO:0000146]; protein domain specific binding [GO:0019904]	actin cytoskeleton [GO:0015629]; apical dendrite [GO:0097440]; axolemma [GO:0030673]; axon [GO:0030424]; basolateral plasma membrane [GO:0016323]; brush border [GO:0005903]; cell cortex [GO:0005938]; cytoplasm [GO:0005737]; cytoplasmic vesicle [GO:0031410]; cytosol [GO:0005829]; early endosome [GO:0005769]; endosome [GO:0005768]; microvillus [GO:0005902]; myelin sheath [GO:0043209]; myosin comple…	GO:0000146; GO:0005516; GO:0005524; GO:0005737; GO:0005768; GO:0005769; GO:0005790; GO:0005829; GO:0005886; GO:0005902; GO:0005903; GO:0005938; GO:0007015; GO:0010923; GO:0015031; GO:0015629; GO:0016323; GO:0016459; GO:0019904; GO:0030050; GO:0030424; GO:0030673; GO:0030898; GO:0030900; GO:0031410; GO:0031982; GO:0043005; GO:0043025; GO:0043204; GO:0043209; GO:0044853; GO:0048306; GO:0051015; GO:…		mmu:338367;	15.596	15.7044	15.7147	15.6454	15.7105	16.223	16.2747	16.0285	15.8941	16.1122
Acyp2_P56375	-0.938322	-0.484051	-0.748328	-1.31911	-0.700189	1.39571	0.579492	1.47899	-0.0522214	0.788037	Acyp2	Acylphosphatase-2	P56375	1.03697	0.000121917	0.00427918	-0.623451	sp|P56375|ACYP2_MOUSE Acylphosphatase-2 OS=Mus musculus OX=10090 GN=Acyp2 PE=1 SV=2					acylphosphatase activity [GO:0003998]; identical protein binding [GO:0042802]	mitochondrion [GO:0005739]	GO:0003998; GO:0005739; GO:0042802		mmu:75572;	16.8252	16.9942	16.8959	16.6836	16.9138	17.6934	17.3898	17.7244	17.1548	17.4674
Hook3_Q8BUK6	-0.792194	-0.738737	-1.00221	-1.17102	-0.639684	1.16108	0.827086	1.5269	0.00527096	0.823508	Hook3	Protein Hook homolog 3	Q8BUK6	1.02266	0.000123007	0.00428705	-0.382186	sp|Q8BUK6|HOOK3_MOUSE Protein Hook homolog 3 OS=Mus musculus OX=10090 GN=Hook3 PE=1 SV=2	FUNCTION: Component of the FTS/Hook/FHIP complex (FHF complex). The FHF complex may function to promote vesicle trafficking and/or fusion via the homotypic vesicular protein sorting complex (the HOPS complex). May regulate clearance of endocytosed receptors such as MSR1. Participates in defining the architecture and localization of the Golgi complex (By similarity). Serves as a target for the spi…	SUBCELLULAR LOCATION: Cytoplasm, cytoskeleton {ECO:0000269|PubMed:15075236, ECO:0000269|PubMed:28003339}. Golgi apparatus {ECO:0000269|PubMed:15075236}. Note=Enriched at the cis-face of the Golgi complex (By similarity). Localizes to microtubule asters in prophase (By similarity). Localizes to the manchette in elongating spermatids (PubMed:28003339). {ECO:0000250|UniProtKB:Q86VS8, ECO:0000269|Pub…		cytoplasmic microtubule organization [GO:0031122]; cytoskeleton-dependent intracellular transport [GO:0030705]; early endosome to late endosome transport [GO:0045022]; endosome organization [GO:0007032]; endosome to lysosome transport [GO:0008333]; Golgi localization [GO:0051645]; interkinetic nuclear migration [GO:0022027]; lysosome organization [GO:0007040]; microtubule anchoring at centrosome …	dynactin binding [GO:0034452]; dynein intermediate chain binding [GO:0045505]; dynein light chain binding [GO:0045503]; dynein light intermediate chain binding [GO:0051959]; identical protein binding [GO:0042802]; microtubule binding [GO:0008017]	centriolar satellite [GO:0034451]; centrosome [GO:0005813]; cis-Golgi network [GO:0005801]; cytoplasm [GO:0005737]; cytosol [GO:0005829]; FHF complex [GO:0070695]; HOPS complex [GO:0030897]; microtubule [GO:0005874]; pericentriolar material [GO:0000242]	GO:0000242; GO:0005737; GO:0005801; GO:0005813; GO:0005829; GO:0005874; GO:0007032; GO:0007040; GO:0008017; GO:0008333; GO:0015031; GO:0022027; GO:0030705; GO:0030897; GO:0031122; GO:0034451; GO:0034452; GO:0034454; GO:0042802; GO:0045022; GO:0045503; GO:0045505; GO:0050768; GO:0051645; GO:0051959; GO:0070695; GO:0071539; GO:0097150		mmu:320191;	16.8857	16.8974	16.8395	16.8023	16.9192	17.3153	17.2418	17.3958	17.0611	17.2411
Atp6v0a1_Q9Z1G4	-0.804688	-0.557095	-0.704281	-1.45758	-0.959349	1.27905	0.612929	1.213	0.503617	0.874403	Atp6v0a1	V-type proton ATPase 116 kDa subunit a isoform 1	Q9Z1G4	1.01795	0.000124049	0.00429313	-0.310938	sp|Q9Z1G4|VPP1_MOUSE V-type proton ATPase 116 kDa subunit a isoform 1 OS=Mus musculus OX=10090 GN=Atp6v0a1 PE=1 SV=3	FUNCTION: Required for assembly and activity of the vacuolar ATPase. Potential role in differential targeting and regulation of the enzyme for a specific organelle (By similarity). {ECO:0000250}.	SUBCELLULAR LOCATION: Cytoplasmic vesicle membrane; Multi-pass membrane protein. Melanosome {ECO:0000250}. Note=Coated vesicle.		regulation of macroautophagy [GO:0016241]; toxin transport [GO:1901998]; vacuolar acidification [GO:0007035]	ATPase binding [GO:0051117]; proton-transporting ATPase activity, rotational mechanism [GO:0046961]	cytoplasm [GO:0005737]; cytosol [GO:0005829]; Golgi apparatus [GO:0005794]; integral component of synaptic vesicle membrane [GO:0030285]; intracellular membrane-bounded organelle [GO:0043231]; intracellular organelle [GO:0043229]; melanosome [GO:0042470]; nuclear speck [GO:0016607]; perinuclear region of cytoplasm [GO:0048471]; plasma membrane [GO:0005886]; synaptic vesicle [GO:0008021]; vacuolar…	GO:0000220; GO:0005737; GO:0005794; GO:0005829; GO:0005886; GO:0007035; GO:0008021; GO:0016241; GO:0016471; GO:0016607; GO:0030285; GO:0042470; GO:0043229; GO:0043231; GO:0046961; GO:0048471; GO:0051117; GO:1901998	R-MMU-1222556;R-MMU-6798695;R-MMU-77387;R-MMU-917977;R-MMU-983712;	mmu:11975;	17.336	17.379	17.3534	17.2228	17.3092	17.6973	17.5818	17.6859	17.5629	17.6272
Nckap1_P28660	-0.597843	-0.589595	-0.901593	-1.34188	-0.931242	1.64257	0.923802	0.952125	0.408163	0.435496	Nckap1	Nck-associated protein 1	P28660	1.02179	0.000125423	0.00431053	-0.367747	sp|P28660|NCKP1_MOUSE Nck-associated protein 1 OS=Mus musculus OX=10090 GN=Nckap1 PE=1 SV=2	FUNCTION: Part of the WAVE complex that regulates lamellipodia formation. The WAVE complex regulates actin filament reorganization via its interaction with the Arp2/3 complex. Actin remodeling activity is regulated by RAC1. As component of the WAVE1 complex, required for BDNF-NTRK2 endocytic trafficking and signaling from early endosomes (PubMed:27605705). {ECO:0000269|PubMed:14765121, ECO:000026…	SUBCELLULAR LOCATION: Cell membrane {ECO:0000269|PubMed:14765121}; Single-pass membrane protein {ECO:0000269|PubMed:14765121}; Cytoplasmic side {ECO:0000269|PubMed:14765121}. Cell projection, lamellipodium membrane {ECO:0000269|PubMed:14765121}; Single-pass membrane protein {ECO:0000269|PubMed:14765121}; Cytoplasmic side {ECO:0000269|PubMed:14765121}. Cytoplasm {ECO:0000269|PubMed:14765121}. Note…		apical protein localization [GO:0045176]; basal protein localization [GO:0045175]; cell migration [GO:0016477]; cell migration involved in gastrulation [GO:0042074]; cell morphogenesis [GO:0000902]; cell projection assembly [GO:0030031]; cortical actin cytoskeleton organization [GO:0030866]; embryonic body morphogenesis [GO:0010172]; embryonic foregut morphogenesis [GO:0048617]; embryonic heart t…		filamentous actin [GO:0031941]; integral component of membrane [GO:0016021]; lamellipodium [GO:0030027]; lamellipodium membrane [GO:0031258]; postsynapse [GO:0098794]; ruffle [GO:0001726]; SCAR complex [GO:0031209]	GO:0000902; GO:0001701; GO:0001726; GO:0001756; GO:0001843; GO:0007354; GO:0007492; GO:0008078; GO:0010172; GO:0010592; GO:0016021; GO:0016477; GO:0016601; GO:0030027; GO:0030031; GO:0030032; GO:0030838; GO:0030866; GO:0030903; GO:0030950; GO:0031209; GO:0031258; GO:0031941; GO:0032880; GO:0035050; GO:0042074; GO:0045175; GO:0045176; GO:0048339; GO:0048340; GO:0048570; GO:0048617; GO:0048812; GO:…	R-MMU-2029482;R-MMU-4420097;R-MMU-5663213;	mmu:50884;	16.9382	16.94	16.8742	16.7814	16.868	17.4104	17.2589	17.2649	17.1503	17.156
Mylk_Q6PDN3	-0.444821	-0.929531	-1.37243	-0.480733	-1.06605	1.0055	1.46454	1.12073	0.469892	0.232912	Mylk	Myosin light chain kinase, smooth muscle;Myosin light chain kinase, smooth muscle, deglutamylated form	Q6PDN3	1.02524	0.00012824	0.00435198	-0.420043	sp|Q6PDN3|MYLK_MOUSE Myosin light chain kinase, smooth muscle OS=Mus musculus OX=10090 GN=Mylk PE=1 SV=3	FUNCTION: Calcium/calmodulin-dependent myosin light chain kinase implicated in smooth muscle contraction via phosphorylation of myosin light chains (MLC). Also regulates actin-myosin interaction through a non-kinase activity. Phosphorylates PTK2B/PYK2 and myosin light-chains. Involved in the inflammatory response (e.g. apoptosis, vascular permeability, leukocyte diapedesis), cell motility and mor…	SUBCELLULAR LOCATION: Cytoplasm {ECO:0000269|PubMed:11832329}. Cell projection, lamellipodium {ECO:0000250|UniProtKB:Q15746}. Cleavage furrow {ECO:0000250|UniProtKB:Q15746}. Cytoplasm, cytoskeleton, stress fiber {ECO:0000269|PubMed:11832329}. Note=Localized to stress fibers during interphase and to the cleavage furrow during mitosis. {ECO:0000250|UniProtKB:Q15746}.; SUBCELLULAR LOCATION: [Isoform…		aorta smooth muscle tissue morphogenesis [GO:0060414]; bleb assembly [GO:0032060]; cellular hypotonic response [GO:0071476]; cellular response to calcium ion [GO:0071277]; cellular response to drug [GO:0035690]; cellular response to potassium ion [GO:0035865]; positive regulation of calcium ion transport [GO:0051928]; positive regulation of cell migration [GO:0030335]; positive regulation of woun…	actin binding [GO:0003779]; ATP binding [GO:0005524]; calmodulin binding [GO:0005516]; enzyme binding [GO:0019899]; metal ion binding [GO:0046872]; myosin light chain kinase activity [GO:0004687]; protein kinase activity [GO:0004672]	actin cytoskeleton [GO:0015629]; cell-cell junction [GO:0005911]; cleavage furrow [GO:0032154]; cytoplasm [GO:0005737]; lamellipodium [GO:0030027]; plasma membrane [GO:0005886]; stress fiber [GO:0001725]	GO:0001725; GO:0003779; GO:0004672; GO:0004687; GO:0005516; GO:0005524; GO:0005737; GO:0005886; GO:0005911; GO:0006939; GO:0014820; GO:0015629; GO:0019899; GO:0030027; GO:0030335; GO:0032060; GO:0032154; GO:0035690; GO:0035865; GO:0046872; GO:0051928; GO:0060414; GO:0071277; GO:0071476; GO:0090303	R-MMU-445355;R-MMU-5627123;		16.7416	16.623	16.5147	16.7328	16.5896	17.0963	17.2086	17.1245	16.9653	16.9073
Cluh_Q5SW19	-0.929089	-0.691145	-0.968548	-0.536658	-1.18279	1.35918	1.02185	1.39656	0.425511	0.105138	Cluh	Clustered mitochondria protein homolog	Q5SW19	1.02433	0.000128387	0.00435198	-0.406001	sp|Q5SW19|CLU_MOUSE Clustered mitochondria protein homolog OS=Mus musculus OX=10090 GN=Cluh PE=1 SV=2	FUNCTION: mRNA-binding protein involved in proper cytoplasmic distribution of mitochondria. Specifically binds mRNAs of nuclear-encoded mitochondrial proteins in the cytoplasm and regulates transport or translation of these transcripts close to mitochondria, playing a role in mitochondrial biogenesis. {ECO:0000255|HAMAP-Rule:MF_03013}.	SUBCELLULAR LOCATION: Cytoplasm {ECO:0000255|HAMAP-Rule:MF_03013}. Cytoplasmic granule {ECO:0000255|HAMAP-Rule:MF_03013}.		intracellular distribution of mitochondria [GO:0048312]; mitochondrion organization [GO:0007005]	mRNA binding [GO:0003729]	cytoplasm [GO:0005737]	GO:0003729; GO:0005737; GO:0007005; GO:0048312		mmu:74148;	16.6746	16.7307	16.6653	16.7671	16.6148	17.2137	17.1342	17.2225	16.9937	16.9183
Clybl_Q8R4N0	-0.408314	-0.654335	-1.13192	-1.29725	-0.766175	1.41085	0.416297	1.49334	0.367069	0.570437	Clybl	Citrate lyase subunit beta-like protein, mitochondrial	Q8R4N0	1.02666	0.000130966	0.0044092	-0.45767	sp|Q8R4N0|CLYBL_MOUSE Citramalyl-CoA lyase, mitochondrial OS=Mus musculus OX=10090 GN=Clybl PE=1 SV=2	FUNCTION: Mitochondrial citramalyl-CoA lyase indirectly involved in the vitamin B12 metabolism (PubMed:29056341). Converts citramalyl-CoA into acetyl-CoA and pyruvate in the C5-dicarboxylate catabolism pathway (By similarity). The C5-dicarboxylate catabolism pathway is required to detoxify itaconate, a vitamin B12-poisoning metabolite (PubMed:29056341). Also acts as a malate synthase in vitro, co…	SUBCELLULAR LOCATION: Mitochondrion {ECO:0000269|PubMed:18614015}.		positive regulation of cobalamin metabolic process [GO:0106121]; protein homotrimerization [GO:0070207]; regulation of cobalamin metabolic process [GO:0106064]	(S)-citramalyl-CoA lyase activity [GO:0047777]; hydrolase activity [GO:0016787]; magnesium ion binding [GO:0000287]; malate synthase activity [GO:0004474]	mitochondrion [GO:0005739]	GO:0000287; GO:0004474; GO:0005739; GO:0016787; GO:0047777; GO:0070207; GO:0106064; GO:0106121		mmu:69634;	17.2889	17.2228	17.0945	17.0501	17.1928	17.7778	17.5105	17.7999	17.4973	17.5519
Plcb3_P51432	-1.17895	-0.694621	-0.691244	-0.926757	-1.02288	1.20089	1.01728	1.33797	0.383618	0.5747	Plcb3	1-phosphatidylinositol 4,5-bisphosphate phosphodiesterase beta-3	P51432	1.01835	0.000133961	0.00447954	-0.296502	sp|P51432|PLCB3_MOUSE 1-phosphatidylinositol 4,5-bisphosphate phosphodiesterase beta-3 OS=Mus musculus OX=10090 GN=Plcb3 PE=1 SV=2	FUNCTION: The production of the second messenger molecules diacylglycerol (DAG) and inositol 1,4,5-trisphosphate (IP3) is mediated by activated phosphatidylinositol-specific phospholipase C enzymes. {ECO:0000250|UniProtKB:Q99JE6}.	SUBCELLULAR LOCATION: Cytoplasm {ECO:0000250|UniProtKB:Q99JE6}. Membrane {ECO:0000250|UniProtKB:Q99JE6}. Nucleus {ECO:0000269|PubMed:9714794}. Note=And particulate fractions. {ECO:0000250|UniProtKB:Q99JE6}.		G protein-coupled receptor signaling pathway [GO:0007186]; inositol trisphosphate metabolic process [GO:0032957]; phosphatidylinositol catabolic process [GO:0031161]; phosphatidylinositol-mediated signaling [GO:0048015]; phosphatidylinositol metabolic process [GO:0046488]; post-Golgi vesicle-mediated transport [GO:0006892]; regulation of systemic arterial blood pressure [GO:0003073]	calcium ion binding [GO:0005509]; calmodulin binding [GO:0005516]; phosphatidylinositol phospholipase C activity [GO:0004435]	cytosol [GO:0005829]; nucleoplasm [GO:0005654]; postsynaptic cytosol [GO:0099524]; protein-containing complex [GO:0032991]; sarcolemma [GO:0042383]	GO:0003073; GO:0004435; GO:0005509; GO:0005516; GO:0005654; GO:0005829; GO:0006892; GO:0007186; GO:0031161; GO:0032957; GO:0032991; GO:0042383; GO:0046488; GO:0048015; GO:0099524	R-MMU-112043;R-MMU-1855204;R-MMU-399997;R-MMU-4086398;R-MMU-416476;R-MMU-418217;R-MMU-434316;R-MMU-500657;	mmu:18797;	16.1129	16.1924	16.193	16.1543	16.1385	16.5037	16.4735	16.5262	16.3695	16.4008
Plg_P20918	-0.433012	-1.54196	-0.82292	-0.430277	-1.05622	1.07443	0.971259	1.37329	0.210467	0.654937	Plg	Plasminogen;Plasmin heavy chain A;Activation peptide;Angiostatin;Plasmin heavy chain A, short form;Plasmin light chain B	P20918	1.02231	0.000136057	0.00448073	-0.420872	sp|P20918|PLMN_MOUSE Plasminogen OS=Mus musculus OX=10090 GN=Plg PE=1 SV=3	FUNCTION: Plasmin dissolves the fibrin of blood clots and acts as a proteolytic factor in a variety of other processes including embryonic development, tissue remodeling, tumor invasion, and inflammation. In ovulation, weakens the walls of the Graafian follicle. It activates the urokinase-type plasminogen activator, collagenases and several complement zymogens, such as C1 and C5. Cleavage of fibr…	SUBCELLULAR LOCATION: Secreted {ECO:0000250}. Note=Locates to the cell surface where it is proteolytically cleaved to produce the active plasmin. Interaction with HRG tethers it to the cell surface (By similarity). {ECO:0000250}.		blood coagulation [GO:0007596]; extracellular matrix disassembly [GO:0022617]; fibrinolysis [GO:0042730]; interaction with symbiont [GO:0051702]; labyrinthine layer blood vessel development [GO:0060716]; mononuclear cell migration [GO:0071674]; muscle cell cellular homeostasis [GO:0046716]; myoblast differentiation [GO:0045445]; negative regulation of angiogenesis [GO:0016525]; negative regulatio…	apolipoprotein binding [GO:0034185]; chaperone binding [GO:0051087]; endopeptidase activity [GO:0004175]; enzyme binding [GO:0019899]; kinase binding [GO:0019900]; protein antigen binding [GO:1990405]; protein domain specific binding [GO:0019904]; serine-type endopeptidase activity [GO:0004252]; signaling receptor binding [GO:0005102]	cell surface [GO:0009986]; collagen-containing extracellular matrix [GO:0062023]; extracellular region [GO:0005576]; extracellular space [GO:0005615]; extrinsic component of external side of plasma membrane [GO:0031232]; extrinsic component of plasma membrane [GO:0019897]; glutamatergic synapse [GO:0098978]; intracellular membrane-bounded organelle [GO:0043231]; plasma membrane [GO:0005886]; Scha…	GO:0004175; GO:0004252; GO:0005102; GO:0005576; GO:0005615; GO:0005886; GO:0006508; GO:0007596; GO:0009986; GO:0010812; GO:0016525; GO:0019897; GO:0019899; GO:0019900; GO:0019904; GO:0022617; GO:0031232; GO:0034185; GO:0042246; GO:0042730; GO:0043231; GO:0043536; GO:0045445; GO:0046716; GO:0048771; GO:0051087; GO:0051603; GO:0051702; GO:0051918; GO:0051919; GO:0060707; GO:0060716; GO:0062023; GO:…	R-MMU-114608;R-MMU-1474228;R-MMU-1592389;R-MMU-186797;R-MMU-75205;R-MMU-8964041;	mmu:18815;	18.9704	18.6981	18.8747	18.9711	18.8174	19.3407	19.3153	19.414	19.1285	19.2376
Map2k6_P70236	-0.653899	-0.521014	-1.34774	-0.875269	-0.753302	1.17316	0.434832	1.56744	-0.0833608	1.05915	Map2k6	Dual specificity mitogen-activated protein kinase kinase 6	P70236	1.06156	0.00013679	0.00448073	-0.731888	sp|P70236|MP2K6_MOUSE Dual specificity mitogen-activated protein kinase kinase 6 OS=Mus musculus OX=10090 GN=Map2k6 PE=1 SV=1	FUNCTION: Dual specificity protein kinase which acts as an essential component of the MAP kinase signal transduction pathway. With MAP3K3/MKK3, catalyzes the concomitant phosphorylation of a threonine and a tyrosine residue in the MAP kinases p38 MAPK11, MAPK12, MAPK13 and MAPK14 and plays an important role in the regulation of cellular responses to cytokines and all kinds of stresses. Especially…	SUBCELLULAR LOCATION: Nucleus {ECO:0000250}. Cytoplasm {ECO:0000250}. Cytoplasm, cytoskeleton {ECO:0000250}. Note=Binds to microtubules. {ECO:0000250}.		activation of MAPK activity [GO:0000187]; apoptotic process [GO:0006915]; cardiac muscle contraction [GO:0060048]; cellular response to sorbitol [GO:0072709]; MAPK cascade [GO:0000165]; negative regulation of cold-induced thermogenesis [GO:0120163]; ovulation cycle process [GO:0022602]; positive regulation of apoptotic process [GO:0043065]; positive regulation of nitric-oxide synthase biosyntheti…	ATP binding [GO:0005524]; identical protein binding [GO:0042802]; MAP kinase kinase activity [GO:0004708]; protein kinase binding [GO:0019901]; protein serine/threonine kinase activity [GO:0004674]; protein tyrosine kinase activity [GO:0004713]	cytoskeleton [GO:0005856]; cytosol [GO:0005829]; nucleoplasm [GO:0005654]	GO:0000165; GO:0000187; GO:0001934; GO:0002931; GO:0004674; GO:0004708; GO:0004713; GO:0005524; GO:0005654; GO:0005829; GO:0005856; GO:0006468; GO:0006915; GO:0019901; GO:0022602; GO:0032308; GO:0042493; GO:0042802; GO:0043065; GO:0051770; GO:0060048; GO:0072709; GO:0120163	R-MMU-168638;R-MMU-2559580;R-MMU-450302;R-MMU-6811555;R-MMU-9020702;	mmu:26399;	11.9664	12.025	11.6606	11.8689	11.9226	12.7718	12.4463	12.9455	12.2179	12.7215
Sbds_P70122	-0.809471	-1.14732	-0.698173	-1.18136	-0.553903	1.69628	0.885307	0.795643	0.381428	0.631565	Sbds	Ribosome maturation protein SBDS	P70122	1.02046	0.000141037	0.00448073	-0.341766	sp|P70122|SBDS_MOUSE Ribosome maturation protein SBDS OS=Mus musculus OX=10090 GN=Sbds PE=1 SV=4	FUNCTION: Required for the assembly of mature ribosomes and ribosome biogenesis. Together with EFL1, triggers the GTP-dependent release of EIF6 from 60S pre-ribosomes in the cytoplasm, thereby activating ribosomes for translation competence by allowing 80S ribosome assembly and facilitating EIF6 recycling to the nucleus, where it is required for 60S rRNA processing and nuclear export. Required fo…	SUBCELLULAR LOCATION: Cytoplasm. Nucleus, nucleolus {ECO:0000250}. Nucleus, nucleoplasm. Cytoplasm, cytoskeleton, spindle {ECO:0000250}. Note=Detected in the cytoplasm, but not in the nucleus (PubMed:21536732). Primarily detected in the cytoplasm, and at low levels in nucleus (PubMed:19602484). Detected in the nucleolus during G1 and G2 phase of the cell cycle, and diffusely distributed in the nu…		bone marrow development [GO:0048539]; bone mineralization [GO:0030282]; hematopoietic progenitor cell differentiation [GO:0002244]; inner cell mass cell proliferation [GO:0001833]; leukocyte chemotaxis [GO:0030595]; mature ribosome assembly [GO:0042256]; mitotic spindle organization [GO:0007052]; rRNA processing [GO:0006364]	microtubule binding [GO:0008017]; ribosome binding [GO:0043022]; rRNA binding [GO:0019843]	cytoplasm [GO:0005737]; cytosol [GO:0005829]; nucleolus [GO:0005730]; nucleoplasm [GO:0005654]; nucleus [GO:0005634]; spindle pole [GO:0000922]	GO:0000922; GO:0001833; GO:0002244; GO:0005634; GO:0005654; GO:0005730; GO:0005737; GO:0005829; GO:0006364; GO:0007052; GO:0008017; GO:0019843; GO:0030282; GO:0030595; GO:0042256; GO:0043022; GO:0048539		mmu:66711;	16.7141	16.6483	16.7357	16.6417	16.7638	17.2017	17.0439	17.0264	16.9458	16.9945
Vti1b_O88384	-0.808081	-1.03888	-0.975644	-1.07494	-0.49698	1.2645	1.20406	0.968086	-0.00514962	0.963035	Vti1b	Vesicle transport through interaction with t-SNAREs homolog 1B	O88384	1.02196	0.000141075	0.00448073	-0.339598	sp|O88384|VTI1B_MOUSE Vesicle transport through interaction with t-SNAREs homolog 1B OS=Mus musculus OX=10090 GN=Vti1b PE=1 SV=1	FUNCTION: V-SNARE that mediates vesicle transport pathways through interactions with t-SNAREs on the target membrane. These interactions are proposed to mediate aspects of the specificity of vesicle trafficking and to promote fusion of the lipid bilayers. {ECO:0000305|PubMed:15363411}.	SUBCELLULAR LOCATION: Early endosome membrane {ECO:0000250|UniProtKB:Q9UEU0}; Single-pass type IV membrane protein {ECO:0000255}. Late endosome membrane {ECO:0000250|UniProtKB:Q9UEU0}; Single-pass type IV membrane protein {ECO:0000250|UniProtKB:Q9UEU0}. Lysosome membrane {ECO:0000250|UniProtKB:Q9UEU0}. Cytoplasmic granule {ECO:0000250|UniProtKB:Q9UEU0}. Recycling endosome membrane {ECO:0000250|Un…		endoplasmic reticulum to Golgi vesicle-mediated transport [GO:0006888]; Golgi to vacuole transport [GO:0006896]; intra-Golgi vesicle-mediated transport [GO:0006891]; protein targeting to vacuole [GO:0006623]; regulation of protein localization to plasma membrane [GO:1903076]; retrograde transport, endosome to Golgi [GO:0042147]; vesicle fusion with Golgi apparatus [GO:0048280]	chloride channel inhibitor activity [GO:0019869]; SNAP receptor activity [GO:0005484]; SNARE binding [GO:0000149]	anchored component of membrane [GO:0031225]; cytosol [GO:0005829]; early endosome membrane [GO:0031901]; endoplasmic reticulum membrane [GO:0005789]; ER to Golgi transport vesicle membrane [GO:0012507]; Golgi apparatus [GO:0005794]; integral component of membrane [GO:0016021]; intracellular membrane-bounded organelle [GO:0043231]; late endosome membrane [GO:0031902]; lysosomal membrane [GO:000576…	GO:0000149; GO:0005484; GO:0005765; GO:0005789; GO:0005794; GO:0005829; GO:0006623; GO:0006888; GO:0006891; GO:0006896; GO:0008021; GO:0012507; GO:0016021; GO:0019869; GO:0031201; GO:0031225; GO:0031901; GO:0031902; GO:0031982; GO:0042147; GO:0043025; GO:0043231; GO:0048280; GO:0048471; GO:0055037; GO:0055038; GO:1903076	R-MMU-114608;		15.4757	15.4311	15.4433	15.4241	15.5358	15.8761	15.8644	15.8188	15.6308	15.8179
Psph_Q99LS3	-1.38201	-0.868201	-1.01351	-0.336917	-0.570323	0.360326	1.64179	0.789884	0.204568	1.1744	Psph	Phosphoserine phosphatase	Q99LS3	1.04871	0.000141795	0.00448073	-0.621016	sp|Q99LS3|SERB_MOUSE Phosphoserine phosphatase OS=Mus musculus OX=10090 GN=Psph PE=1 SV=1	FUNCTION: Catalyzes the last step in the biosynthesis of serine from carbohydrates. The reaction mechanism proceeds via the formation of a phosphoryl-enzyme intermediates (By similarity). {ECO:0000250}.			dephosphorylation [GO:0016311]; in utero embryonic development [GO:0001701]; L-serine biosynthetic process [GO:0006564]; L-serine metabolic process [GO:0006563]; response to mechanical stimulus [GO:0009612]; response to nutrient levels [GO:0031667]; response to testosterone [GO:0033574]	calcium ion binding [GO:0005509]; identical protein binding [GO:0042802]; magnesium ion binding [GO:0000287]; phosphatase activity [GO:0016791]; phosphoserine phosphatase activity [GO:0004647]; protein homodimerization activity [GO:0042803]	cytoplasm [GO:0005737]; neuron projection [GO:0043005]	GO:0000287; GO:0001701; GO:0004647; GO:0005509; GO:0005737; GO:0006563; GO:0006564; GO:0009612; GO:0016311; GO:0016791; GO:0031667; GO:0033574; GO:0042802; GO:0042803; GO:0043005	R-MMU-977347;	mmu:100678;	12.5465	12.7377	12.6837	12.9355	12.8486	13.195	13.672	13.3549	13.1371	13.4981
Plxdc2_Q9DC11	-1.10228	-0.80411	-1.10206	-0.774536	-0.455811	1.10756	1.6379	1.00677	0.0498269	0.436737	Plxdc2	Plexin domain-containing protein 2	Q9DC11	1.02867	0.000144025	0.00448073	-0.465929	sp|Q9DC11|PXDC2_MOUSE Plexin domain-containing protein 2 OS=Mus musculus OX=10090 GN=Plxdc2 PE=1 SV=1	FUNCTION: May play a role in tumor angiogenesis. {ECO:0000269|PubMed:11559528}.	SUBCELLULAR LOCATION: Membrane {ECO:0000305}; Single-pass type I membrane protein {ECO:0000305}.				collagen-containing extracellular matrix [GO:0062023]; integral component of membrane [GO:0016021]; plasma membrane [GO:0005886]	GO:0005886; GO:0016021; GO:0062023		mmu:67448;	16.1816	16.2635	16.1817	16.2717	16.3592	16.7889	16.9346	16.7612	16.4982	16.6045
Ak2_Q9WTP6	-1.17894	-1.12483	-0.543783	-0.596433	-0.941977	0.64213	1.54696	1.02115	0.953087	0.222632	Ak2	Adenylate kinase 2, mitochondrial;Adenylate kinase 2, mitochondrial, N-terminally processed	Q9WTP6	1.0184	0.000144109	0.00448073	-0.342238	sp|Q9WTP6|KAD2_MOUSE Adenylate kinase 2, mitochondrial OS=Mus musculus OX=10090 GN=Ak2 PE=1 SV=5	FUNCTION: Catalyzes the reversible transfer of the terminal phosphate group between ATP and AMP. Plays an important role in cellular energy homeostasis and in adenine nucleotide metabolism. Adenylate kinase activity is critical for regulation of the phosphate utilization and the AMP de novo biosynthesis pathways. Plays a key role in hematopoiesis. {ECO:0000255|HAMAP-Rule:MF_03168}.	SUBCELLULAR LOCATION: Mitochondrion intermembrane space {ECO:0000255|HAMAP-Rule:MF_03168}.		ADP biosynthetic process [GO:0006172]; AMP metabolic process [GO:0046033]; ATP metabolic process [GO:0046034]; dATP metabolic process [GO:0046060]; nucleoside diphosphate metabolic process [GO:0009132]; purine nucleotide metabolic process [GO:0006163]	adenylate kinase activity [GO:0004017]; ATP binding [GO:0005524]	cytoplasm [GO:0005737]; cytosol [GO:0005829]; mitochondrial inner membrane [GO:0005743]; mitochondrial intermembrane space [GO:0005758]; mitochondrion [GO:0005739]; nucleus [GO:0005634]; sperm flagellum [GO:0036126]; sperm mitochondrial sheath [GO:0097226]	GO:0004017; GO:0005524; GO:0005634; GO:0005737; GO:0005739; GO:0005743; GO:0005758; GO:0005829; GO:0006163; GO:0006172; GO:0009132; GO:0036126; GO:0046033; GO:0046034; GO:0046060; GO:0097226	R-MMU-499943;	mmu:11637;	18.5413	18.5519	18.6652	18.6549	18.5875	18.8966	19.0731	18.9705	18.9572	18.8147
Pcca_Q91ZA3	-0.656014	-0.733736	-0.959559	-1.34611	-0.63876	1.32066	0.903487	1.21471	0.92397	-0.028648	Pcca	Propionyl-CoA carboxylase alpha chain, mitochondrial	Q91ZA3	1.02028	0.00014428	0.00448073	-0.372535	sp|Q91ZA3|PCCA_MOUSE Propionyl-CoA carboxylase alpha chain, mitochondrial OS=Mus musculus OX=10090 GN=Pcca PE=1 SV=2	FUNCTION: This is one of the 2 subunits of the biotin-dependent propionyl-CoA carboxylase (PCC), a mitochondrial enzyme involved in the catabolism of odd chain fatty acids, branched-chain amino acids isoleucine, threonine, methionine, and valine and other metabolites. Propionyl-CoA carboxylase catalyzes the carboxylation of propionyl-CoA/propanoyl-CoA to D-methylmalonyl-CoA/(S)-methylmalonyl-CoA …	SUBCELLULAR LOCATION: Mitochondrion matrix {ECO:0000250|UniProtKB:P05165}.	DISEASE: Note=Propionic acidemia due to recessively inherited deficiency of PCCase activity often causes life-threatening ketosis and acidosis.	lipid catabolic process [GO:0016042]	ATP binding [GO:0005524]; CoA carboxylase activity [GO:0016421]; enzyme binding [GO:0019899]; metal ion binding [GO:0046872]; propionyl-CoA carboxylase activity [GO:0004658]	mitochondrial matrix [GO:0005759]; mitochondrion [GO:0005739]	GO:0004658; GO:0005524; GO:0005739; GO:0005759; GO:0016042; GO:0016421; GO:0019899; GO:0046872	R-MMU-196780;R-MMU-71032;	mmu:110821;	18.4182	18.4015	18.3529	18.2699	18.4219	18.8429	18.7533	18.8202	18.7577	18.553
H2-Q10_P01898	-0.865956	-0.976733	-0.522471	-1.26808	-0.599387	1.42036	0.571128	1.57674	0.384246	0.28015	H2-Q10	H-2 class I histocompatibility antigen, Q10 alpha chain	P01898	1.02883	0.000144317	0.00448073	-0.474537	sp|P01898|HA10_MOUSE H-2 class I histocompatibility antigen, Q10 alpha chain OS=Mus musculus OX=10090 GN=H2-Q10 PE=1 SV=3	FUNCTION: Involved in the presentation of foreign antigens to the immune system.	SUBCELLULAR LOCATION: Membrane; Single-pass type I membrane protein.		antigen processing and presentation of endogenous peptide antigen via MHC class Ib [GO:0002476]; antigen processing and presentation of peptide antigen via MHC class I [GO:0002474]	beta-2-microglobulin binding [GO:0030881]; CD8 receptor binding [GO:0042610]; peptide antigen binding [GO:0042605]; peptide binding [GO:0042277]; protein-containing complex binding [GO:0044877]; signaling receptor binding [GO:0005102]; TAP binding [GO:0046977]; TAP complex binding [GO:0062061]; T cell receptor binding [GO:0042608]	cell surface [GO:0009986]; endoplasmic reticulum [GO:0005783]; endoplasmic reticulum exit site [GO:0070971]; external side of plasma membrane [GO:0009897]; extracellular space [GO:0005615]; Golgi apparatus [GO:0005794]; Golgi medial cisterna [GO:0005797]; integral component of lumenal side of endoplasmic reticulum membrane [GO:0071556]; MHC class I peptide loading complex [GO:0042824]; MHC class …	GO:0002474; GO:0002476; GO:0005102; GO:0005615; GO:0005783; GO:0005794; GO:0005797; GO:0005886; GO:0009897; GO:0009986; GO:0030670; GO:0030881; GO:0042277; GO:0042605; GO:0042608; GO:0042610; GO:0042612; GO:0042824; GO:0044877; GO:0046977; GO:0062061; GO:0070971; GO:0071556	R-MMU-1236974;R-MMU-1236977;R-MMU-198933;R-MMU-2172127;R-MMU-2424491;R-MMU-6798695;R-MMU-983170;	mmu:15007;	16.4554	16.4244	16.5517	16.3427	16.5302	17.0963	16.8582	17.1401	16.8059	16.7767
Mmab_Q9D273	-0.86736	-0.516073	-0.736413	-1.51389	-0.597786	1.69042	1.0649	0.686863	0.30807	0.481269	Mmab	Cob(I)yrinic acid a,c-diamide adenosyltransferase, mitochondrial	Q9D273	1.03296	0.000144821	0.00448073	-0.475473	sp|Q9D273|MMAB_MOUSE Corrinoid adenosyltransferase OS=Mus musculus OX=10090 GN=Mmab PE=1 SV=1	FUNCTION: Adenosyltransferase involved in intracellular vitamin B12 metabolism. Generates adenosylcobalamin (AdoCbl) and directly delivers the cofactor to MUT in a transfer that is stimulated by ATP-binding to MMAB and gated by MMAA. {ECO:0000250|UniProtKB:Q96EY8}.	SUBCELLULAR LOCATION: Mitochondrion {ECO:0000250|UniProtKB:Q96EY8}.		cobalamin metabolic process [GO:0009235]	ATP binding [GO:0005524]; cob(I)yrinic acid a,c-diamide adenosyltransferase activity [GO:0008817]; cobalamin binding [GO:0031419]	mitochondrion [GO:0005739]	GO:0005524; GO:0005739; GO:0008817; GO:0009235; GO:0031419	R-MMU-196741;	mmu:77697;	14.421	14.5197	14.4578	14.2394	14.4968	15.1396	14.9638	14.8576	14.7512	14.7999
Fmr1_P35922	-1.13723	-0.342217	-0.640016	-1.15908	-0.953271	1.03993	0.994093	1.47033	-0.100836	0.828304	Fmr1	Fragile X mental retardation protein 1 homolog	P35922	1.02799	0.000145603	0.00448073	-0.473897	sp|P35922|FMR1_MOUSE Synaptic functional regulator FMR1 OS=Mus musculus OX=10090 GN=Fmr1 PE=1 SV=1	FUNCTION: Multifunctional polyribosome-associated RNA-binding protein that plays a central role in neuronal development and synaptic plasticity through the regulation of alternative mRNA splicing, mRNA stability, mRNA dendritic transport and postsynaptic local protein synthesis of a subset of mRNAs (PubMed:11438589, PubMed:12032354, PubMed:15475576, PubMed:16631377, PubMed:16790844, PubMed:174176…	SUBCELLULAR LOCATION: Nucleus {ECO:0000269|PubMed:16908410, ECO:0000269|PubMed:8842725, ECO:0000269|PubMed:8895584}. Nucleus, nucleolus {ECO:0000250|UniProtKB:Q06787}. Chromosome, centromere {ECO:0000269|PubMed:24813610}. Chromosome {ECO:0000269|PubMed:24813610}. Cytoplasm {ECO:0000269|PubMed:11438699, ECO:0000269|PubMed:14570712, ECO:0000269|PubMed:15317853, ECO:0000269|PubMed:16790844, ECO:0000…		anterograde axonal transport [GO:0008089]; cellular response to DNA damage stimulus [GO:0006974]; cellular response to hydroxyurea [GO:0072711]; cellular response to UV [GO:0034644]; cellular response to virus [GO:0098586]; central nervous system development [GO:0007417]; dendritic spine development [GO:0060996]; gene silencing by RNA [GO:0031047]; glutamate receptor signaling pathway [GO:0007215…	chromatin binding [GO:0003682]; dynein complex binding [GO:0070840]; G-quadruplex RNA binding [GO:0002151]; identical protein binding [GO:0042802]; ion channel binding [GO:0044325]; methylated histone binding [GO:0035064]; microtubule binding [GO:0008017]; miRNA binding [GO:0035198]; mRNA 3'-UTR binding [GO:0003730]; mRNA 5'-UTR binding [GO:0048027]; mRNA binding [GO:0003729]; poly(G) binding [GO…	axon [GO:0030424]; axon cytoplasm [GO:1904115]; axon terminus [GO:0043679]; Cajal body [GO:0015030]; cell body [GO:0044297]; cell projection [GO:0042995]; chromocenter [GO:0010369]; chromosome [GO:0005694]; chromosome, centromeric region [GO:0000775]; cytoplasm [GO:0005737]; cytoplasmic ribonucleoprotein granule [GO:0036464]; cytoplasmic stress granule [GO:0010494]; cytosol [GO:0005829]; dendrite…	GO:0000340; GO:0000381; GO:0000775; GO:0001934; GO:0002091; GO:0002092; GO:0002151; GO:0003682; GO:0003723; GO:0003729; GO:0003730; GO:0005634; GO:0005654; GO:0005694; GO:0005730; GO:0005737; GO:0005790; GO:0005791; GO:0005829; GO:0005844; GO:0005845; GO:0006397; GO:0006974; GO:0007215; GO:0007417; GO:0008017; GO:0008089; GO:0008266; GO:0008380; GO:0010369; GO:0010494; GO:0010628; GO:0010629; GO:…			16.85	17.0726	16.9892	16.8439	16.9015	17.4595	17.4467	17.58	17.1402	17.4003
_Q9D6W8	-0.58755	-0.755002	-0.820615	-1.2908	-0.826083	0.728472	1.39282	1.53593	0.45127	0.171569		Uncharacterized protein C17orf59 homolog	Q9D6W8	1.02944	0.000145708	0.00448073	-0.415417	sp|Q9D6W8|BORC6_MOUSE BLOC-1-related complex subunit 6 OS=Mus musculus OX=10090 GN=Borcs6 PE=1 SV=1	FUNCTION: As part of the BORC complex may play a role in lysosomes movement and localization at the cell periphery. Associated with the cytosolic face of lysosomes, the BORC complex may recruit ARL8B and couple lysosomes to microtubule plus-end-directed kinesin motor. {ECO:0000250|UniProtKB:Q96GS4}.	SUBCELLULAR LOCATION: Lysosome membrane {ECO:0000250|UniProtKB:Q96GS4}.		lysosome localization [GO:0032418]	identical protein binding [GO:0042802]	BORC complex [GO:0099078]; lysosomal membrane [GO:0005765]	GO:0005765; GO:0032418; GO:0042802; GO:0099078		mmu:71923;	14.1758	14.1352	14.1192	14.0051	14.1179	14.4951	14.6563	14.691	14.4279	14.36
Ubr5_Q80TP3	-0.48339	-1.46387	-0.847759	-1.26005	-0.244481	1.43891	0.410619	0.87171	0.709301	0.869009	Ubr5	E3 ubiquitin-protein ligase UBR5	Q80TP3	1.02801	0.000146004	0.00448073	-0.397429	sp|Q80TP3|UBR5_MOUSE E3 ubiquitin-protein ligase UBR5 OS=Mus musculus OX=10090 GN=Ubr5 PE=1 SV=2	FUNCTION: E3 ubiquitin-protein ligase which is a component of the N-end rule pathway. Ubiquitinates acetylated PCK1. Also acts as a regulator of DNA damage response by acting as a suppressor of RNF168, an E3 ubiquitin-protein ligase that promotes accumulation of 'Lys-63'-linked histone H2A and H2AX at DNA damage sites, thereby acting as a guard against excessive spreading of ubiquitinated chromat…	SUBCELLULAR LOCATION: Nucleus {ECO:0000250}.		cellular response to DNA damage stimulus [GO:0006974]; DNA repair [GO:0006281]; negative regulation of double-strand break repair [GO:2000780]; negative regulation of histone H2A K63-linked ubiquitination [GO:1901315]; negative regulation of interleukin-17 production [GO:0032700]; positive regulation of canonical Wnt signaling pathway [GO:0090263]; positive regulation of gene expression [GO:00106…	RNA binding [GO:0003723]; ubiquitin binding [GO:0043130]; ubiquitin protein ligase activity [GO:0061630]; ubiquitin-ubiquitin ligase activity [GO:0034450]; zinc ion binding [GO:0008270]	cytosol [GO:0005829]; nucleoplasm [GO:0005654]; nucleus [GO:0005634]; perinuclear region of cytoplasm [GO:0048471]; protein-containing complex [GO:0032991]	GO:0000209; GO:0003723; GO:0005634; GO:0005654; GO:0005829; GO:0006281; GO:0006974; GO:0008270; GO:0010628; GO:0031647; GO:0032700; GO:0032991; GO:0034450; GO:0042307; GO:0043130; GO:0048471; GO:0050847; GO:0061630; GO:0070936; GO:0090263; GO:1901315; GO:2000779; GO:2000780		mmu:70790;	14.2757	14.0491	14.1915	14.0962	14.3309	14.7199	14.4823	14.5888	14.5513	14.5882
Hspa12b_Q9CZJ2	-0.455194	-0.896911	-1.20823	-1.41113	-0.419737	1.44232	0.859784	0.913606	0.498421	0.677073	Hspa12b	Heat shock 70 kDa protein 12B	Q9CZJ2	1.01989	0.000146672	0.00448073	-0.338256	sp|Q9CZJ2|HS12B_MOUSE Heat shock 70 kDa protein 12B OS=Mus musculus OX=10090 GN=Hspa12b PE=1 SV=1					ATP binding [GO:0005524]		GO:0005524	R-MMU-3371453;	mmu:72630;	17.0849	16.9998	16.9398	16.9008	17.0917	17.4503	17.3381	17.3485	17.2685	17.3029
Immt_Q8CAQ8	-0.844452	-0.968248	-0.676662	-1.04454	-0.949469	1.05027	1.37471	1.18522	0.681679	0.191499	Immt	MICOS complex subunit Mic60	Q8CAQ8	1.01559	0.000148031	0.00449452	-0.301046	sp|Q8CAQ8|MIC60_MOUSE MICOS complex subunit Mic60 OS=Mus musculus OX=10090 GN=Immt PE=1 SV=1	FUNCTION: Component of the MICOS complex, a large protein complex of the mitochondrial inner membrane that plays crucial roles in the maintenance of crista junctions, inner membrane architecture, and formation of contact sites to the outer membrane. Plays an important role in the maintenance of the MICOS complex stability and the mitochondrial cristae morphology. {ECO:0000250|UniProtKB:Q16891}.	SUBCELLULAR LOCATION: Mitochondrion inner membrane {ECO:0000250|UniProtKB:Q16891}; Single-pass membrane protein {ECO:0000255}. Mitochondrion {ECO:0000250|UniProtKB:Q16891}.		cristae formation [GO:0042407]; mitochondrial calcium ion homeostasis [GO:0051560]; mitochondrion morphogenesis [GO:0070584]		MICOS complex [GO:0061617]; mitochondrial inner membrane [GO:0005743]; mitochondrial intermembrane space [GO:0005758]; mitochondrion [GO:0005739]; myelin sheath [GO:0043209]	GO:0005739; GO:0005743; GO:0005758; GO:0042407; GO:0043209; GO:0051560; GO:0061617; GO:0070584		mmu:76614;	19.3185	19.2977	19.3467	19.2849	19.3009	19.6366	19.691	19.6592	19.5747	19.4924
Serpinf2_Q61247	-0.328077	-1.48782	-1.00344	-0.629985	-0.830359	1.25475	0.348292	1.47043	0.611177	0.595037	Serpinf2	Alpha-2-antiplasmin	Q61247	1.02352	0.000150949	0.00455515	-0.410837	sp|Q61247|A2AP_MOUSE Alpha-2-antiplasmin OS=Mus musculus OX=10090 GN=Serpinf2 PE=1 SV=1	FUNCTION: Serine protease inhibitor. The major targets of this inhibitor are plasmin and trypsin, but it also inactivates matriptase-3/TMPRSS7 and chymotrypsin (By similarity). {ECO:0000250}.	SUBCELLULAR LOCATION: Secreted.		acute-phase response [GO:0006953]; blood vessel morphogenesis [GO:0048514]; collagen fibril organization [GO:0030199]; negative regulation of endopeptidase activity [GO:0010951]; negative regulation of fibrinolysis [GO:0051918]; negative regulation of plasminogen activation [GO:0010757]; positive regulation of cell differentiation [GO:0045597]; positive regulation of collagen biosynthetic process…	protease binding [GO:0002020]; protein homodimerization activity [GO:0042803]; serine-type endopeptidase inhibitor activity [GO:0004867]	cell surface [GO:0009986]; collagen-containing extracellular matrix [GO:0062023]; extracellular space [GO:0005615]; fibrinogen complex [GO:0005577]	GO:0002020; GO:0002034; GO:0004867; GO:0005577; GO:0005615; GO:0006953; GO:0009986; GO:0010757; GO:0010951; GO:0030199; GO:0032967; GO:0042803; GO:0045597; GO:0045944; GO:0046330; GO:0048514; GO:0048661; GO:0051496; GO:0051918; GO:0062023; GO:0070374; GO:0071636	R-MMU-114608;R-MMU-75205;	mmu:18816;	17.5918	17.3135	17.4297	17.5194	17.4713	17.9717	17.7541	18.0234	17.8172	17.8133
Prelp_Q9JK53	-0.790532	-0.583527	-1.33678	-1.30804	-0.206408	1.4225	0.577868	1.18438	0.210067	0.830471	Prelp	Prolargin	Q9JK53	1.0259	0.000154189	0.00461902	-0.471631	sp|Q9JK53|PRELP_MOUSE Prolargin OS=Mus musculus OX=10090 GN=Prelp PE=1 SV=2	FUNCTION: May anchor basement membranes to the underlying connective tissue. {ECO:0000250}.	SUBCELLULAR LOCATION: Secreted, extracellular space, extracellular matrix.		cell aging [GO:0007569]	extracellular matrix structural constituent [GO:0005201]; heparin binding [GO:0008201]	collagen-containing extracellular matrix [GO:0062023]; extracellular space [GO:0005615]	GO:0005201; GO:0005615; GO:0007569; GO:0008201; GO:0062023	R-MMU-2022854;R-MMU-2022857;	mmu:116847;	18.2219	18.2796	18.0694	18.0775	18.3849	18.8394	18.6037	18.773	18.5011	18.6742
Kank2_Q8BX02	-0.726547	-0.311908	-0.986997	-1.57425	-0.651423	1.26899	0.66894	1.376	0.236529	0.700667	Kank2	KN motif and ankyrin repeat domain-containing protein 2	Q8BX02	1.02571	0.00015532	0.00461902	-0.436385	sp|Q8BX02|KANK2_MOUSE KN motif and ankyrin repeat domain-containing protein 2 OS=Mus musculus OX=10090 GN=Kank2 PE=1 SV=1	FUNCTION: Involved in transcription regulation by sequestering in the cytoplasm nuclear receptor coactivators such as NCOA1, NCOA2 and NCOA3 (By similarity). Involved in regulation of caspase-independent apoptosis by sequestering the proapoptotic factor AIFM1 in mitochondria (By similarity). Pro-apoptotic stimuli can induce its proteasomal degradation allowing the translocation of AIFM1 to the nu…	SUBCELLULAR LOCATION: Cytoplasm {ECO:0000250|UniProtKB:Q63ZY3}. Mitochondrion {ECO:0000250|UniProtKB:Q63ZY3}.		apoptotic process [GO:0006915]; glomerular visceral epithelial cell migration [GO:0090521]; kidney epithelium development [GO:0072073]; negative regulation of cell population proliferation [GO:0008285]; negative regulation of G1/S transition of mitotic cell cycle [GO:2000134]; negative regulation of intracellular estrogen receptor signaling pathway [GO:0033147]; negative regulation of programmed …		cytoplasm [GO:0005737]; mitochondrion [GO:0005739]	GO:0000122; GO:0005737; GO:0005739; GO:0006915; GO:0008285; GO:0033147; GO:0035023; GO:0043069; GO:0051497; GO:0070563; GO:0072073; GO:0090521; GO:2000134		mmu:235041;	17.0051	17.1115	16.9383	16.7876	17.0244	17.5172	17.3633	17.5447	17.2523	17.3714
Tf_Q921I1	-0.470185	-1.63599	-0.36711	-0.654048	-1.21766	0.663495	0.941426	0.98946	1.20647	0.544151	Tf	Serotransferrin	Q921I1	1.01675	0.000155865	0.00461902	-0.358156	sp|Q921I1|TRFE_MOUSE Serotransferrin OS=Mus musculus OX=10090 GN=Tf PE=1 SV=1	FUNCTION: Transferrins are iron binding transport proteins which can bind two Fe(3+) ions in association with the binding of an anion, usually bicarbonate. It is responsible for the transport of iron from sites of absorption and heme degradation to those of storage and utilization. Serum transferrin may also have a further role in stimulating cell proliferation.	SUBCELLULAR LOCATION: Secreted.		actin filament organization [GO:0007015]; activation of JUN kinase activity [GO:0007257]; antibacterial humoral response [GO:0019731]; cellular iron ion homeostasis [GO:0006879]; cellular response to iron ion [GO:0071281]; ERK1 and ERK2 cascade [GO:0070371]; iron ion transport [GO:0006826]; osteoclast differentiation [GO:0030316]; positive regulation of bone resorption [GO:0045780]; positive regu…	ferric iron binding [GO:0008199]; ferrous iron binding [GO:0008198]; iron chaperone activity [GO:0034986]; transferrin receptor binding [GO:1990459]	apical plasma membrane [GO:0016324]; basal part of cell [GO:0045178]; basal plasma membrane [GO:0009925]; basement membrane [GO:0005604]; cell surface [GO:0009986]; cell tip [GO:0051286]; clathrin-coated pit [GO:0005905]; cytoplasmic vesicle [GO:0031410]; dense body [GO:0097433]; early endosome [GO:0005769]; endocytic vesicle [GO:0030139]; endosome [GO:0005768]; extracellular region [GO:0005576];…	GO:0005576; GO:0005604; GO:0005615; GO:0005768; GO:0005769; GO:0005770; GO:0005886; GO:0005905; GO:0006826; GO:0006879; GO:0007015; GO:0007257; GO:0008198; GO:0008199; GO:0009617; GO:0009925; GO:0009986; GO:0016020; GO:0016324; GO:0019731; GO:0030120; GO:0030139; GO:0030316; GO:0031232; GO:0031410; GO:0031643; GO:0031982; GO:0034756; GO:0034986; GO:0042327; GO:0045178; GO:0045780; GO:0045893; GO:…	R-MMU-114608;R-MMU-381426;R-MMU-8856825;R-MMU-8856828;R-MMU-8957275;R-MMU-917937;R-MMU-917977;	mmu:22041;	21.4683	21.228	21.4895	21.4304	21.3142	21.7019	21.7592	21.7691	21.8138	21.6773
Pkn2_Q8BWW9	-1.03092	-0.521524	-0.654707	-1.38808	-0.554006	1.481	0.774793	1.38977	-0.0228729	0.526539	Pkn2	Serine/threonine-protein kinase N2	Q8BWW9	1.05014	0.000157004	0.00462507	-0.652138	sp|Q8BWW9|PKN2_MOUSE Serine/threonine-protein kinase N2 OS=Mus musculus OX=10090 GN=Pkn2 PE=1 SV=3	FUNCTION: PKC-related serine/threonine-protein kinase and Rho/Rac effector protein that participates in specific signal transduction responses in the cell. Plays a role in the regulation of cell cycle progression, actin cytoskeleton assembly, cell migration, cell adhesion, tumor cell invasion and transcription activation signaling processes. Phosphorylates CTTN in hyaluronan-induced astrocytes an…	SUBCELLULAR LOCATION: Cytoplasm {ECO:0000269|PubMed:9121475}. Nucleus {ECO:0000250|UniProtKB:Q16513}. Membrane {ECO:0000269|PubMed:9121475}. Cell projection, lamellipodium {ECO:0000250|UniProtKB:Q16513}. Cytoplasm, cytoskeleton {ECO:0000250|UniProtKB:Q16513}. Cleavage furrow {ECO:0000250|UniProtKB:Q16513}. Midbody {ECO:0000250|UniProtKB:Q16513}. Cell junction {ECO:0000250|UniProtKB:Q16513}. Note=…		apical junction assembly [GO:0043297]; apoptotic process [GO:0006915]; cell adhesion [GO:0007155]; cell cycle [GO:0007049]; cell division [GO:0051301]; cell projection organization [GO:0030030]; epithelial cell migration [GO:0010631]; intracellular signal transduction [GO:0035556]; peptidyl-serine phosphorylation [GO:0018105]; positive regulation of cytokinesis [GO:0032467]; positive regulation o…	ATP binding [GO:0005524]; calcium-dependent protein kinase C activity [GO:0004698]; GTP-Rho binding [GO:0017049]; histone deacetylase binding [GO:0042826]; kinase activity [GO:0016301]; protein serine/threonine kinase activity [GO:0004674]; RNA polymerase binding [GO:0070063]	apical junction complex [GO:0043296]; centrosome [GO:0005813]; cleavage furrow [GO:0032154]; cytoplasm [GO:0005737]; cytosol [GO:0005829]; intermediate filament cytoskeleton [GO:0045111]; lamellipodium [GO:0030027]; midbody [GO:0030496]; nuclear body [GO:0016604]; nucleoplasm [GO:0005654]; nucleus [GO:0005634]; perinuclear region of cytoplasm [GO:0048471]; plasma membrane [GO:0005886]; protein-co…	GO:0004674; GO:0004698; GO:0005524; GO:0005634; GO:0005654; GO:0005737; GO:0005813; GO:0005829; GO:0005886; GO:0006468; GO:0006915; GO:0007049; GO:0007155; GO:0010631; GO:0016301; GO:0016604; GO:0017049; GO:0018105; GO:0030027; GO:0030030; GO:0030496; GO:0032154; GO:0032467; GO:0032991; GO:0035556; GO:0042826; GO:0043296; GO:0043297; GO:0045070; GO:0045111; GO:0045931; GO:0048471; GO:0051301; GO:…	R-MMU-5625740;	mmu:109333;	12.9262	13.1264	13.074	12.7859	13.1136	13.9132	13.6357	13.8774	13.3223	13.5382
Cfap36_Q8C6E0	-1.32139	-0.462852	-0.926296	-1.28183	-0.165974	1.43471	0.752046	1.04506	0.0356461	0.890868	Cfap36	Cilia- and flagella-associated protein 36	Q8C6E0	1.0506	0.0001593	0.00463327	-0.610642	sp|Q8C6E0|CFA36_MOUSE Cilia- and flagella-associated protein 36 OS=Mus musculus OX=10090 GN=Cfap36 PE=1 SV=1	FUNCTION: May act as an effector for ARL3. {ECO:0000250}.	SUBCELLULAR LOCATION: Nucleus {ECO:0000250|UniProtKB:Q96G28}. Cytoplasm {ECO:0000250|UniProtKB:Q96G28}. Cell projection, cilium, flagellum {ECO:0000305}.			protein N-terminus binding [GO:0047485]	axoneme [GO:0005930]; ciliary base [GO:0097546]; ciliary transition zone [GO:0035869]; motile cilium [GO:0031514]; nucleus [GO:0005634]	GO:0005634; GO:0005930; GO:0031514; GO:0035869; GO:0047485; GO:0097546		mmu:216618;	11.8889	12.204	12.0339	11.9034	12.313	12.9007	12.65	12.7576	12.387	12.701
Myo1b_P46735	-0.613125	-0.609901	-0.97343	-1.24992	-0.832823	1.26197	1.15105	1.26619	-0.1171	0.717091	Myo1b	Unconventional myosin-Ib	P46735	1.02512	0.000160405	0.00463327	-0.403063	sp|P46735|MYO1B_MOUSE Unconventional myosin-Ib OS=Mus musculus OX=10090 GN=Myo1b PE=1 SV=3	FUNCTION: Motor protein that may participate in process critical to neuronal development and function such as cell migration, neurite outgrowth and vesicular transport.			actin filament-based movement [GO:0030048]; actin filament bundle assembly [GO:0051017]; actin filament organization [GO:0007015]; post-Golgi vesicle-mediated transport [GO:0006892]; transferrin transport [GO:0033572]; vesicle transport along actin filament [GO:0030050]	actin binding [GO:0003779]; actin-dependent ATPase activity [GO:0030898]; actin filament binding [GO:0051015]; ATP binding [GO:0005524]; calmodulin binding [GO:0005516]; microfilament motor activity [GO:0000146]; motor activity [GO:0003774]; phosphatidylinositol-3,4,5-trisphosphate binding [GO:0005547]; phosphatidylinositol-4,5-bisphosphate binding [GO:0005546]	actin cytoskeleton [GO:0015629]; actin filament [GO:0005884]; apical part of cell [GO:0045177]; brush border [GO:0005903]; cell periphery [GO:0071944]; cytoplasm [GO:0005737]; early endosome [GO:0005769]; endosome membrane [GO:0010008]; filopodium [GO:0030175]; microvillus [GO:0005902]; myosin complex [GO:0016459]; perinuclear region of cytoplasm [GO:0048471]; plasma membrane [GO:0005886]; vesicl…	GO:0000146; GO:0003774; GO:0003779; GO:0005516; GO:0005524; GO:0005546; GO:0005547; GO:0005737; GO:0005769; GO:0005884; GO:0005886; GO:0005902; GO:0005903; GO:0006892; GO:0007015; GO:0010008; GO:0015629; GO:0016459; GO:0030048; GO:0030050; GO:0030175; GO:0030898; GO:0031982; GO:0033572; GO:0045177; GO:0048471; GO:0051015; GO:0051017; GO:0071944		mmu:17912;	16.1041	16.1049	16.0193	15.9542	16.0524	16.5457	16.5195	16.5467	16.2209	16.4174
Uevld_Q3U1V6	-1.08601	-1.26505	-0.661579	-0.979494	-0.297751	0.862856	0.145551	1.50441	0.637022	1.14005	Uevld	Ubiquitin-conjugating enzyme E2 variant 3	Q3U1V6	1.02897	0.000160934	0.00463327	-0.393457	sp|Q3U1V6|UEVLD_MOUSE Ubiquitin-conjugating enzyme E2 variant 3 OS=Mus musculus OX=10090 GN=Uevld PE=1 SV=1	FUNCTION: Possible negative regulator of polyubiquitination. {ECO:0000250}.			carbohydrate metabolic process [GO:0005975]; carboxylic acid metabolic process [GO:0019752]; cellular protein modification process [GO:0006464]; protein transport [GO:0015031]	oxidoreductase activity, acting on the CH-OH group of donors, NAD or NADP as acceptor [GO:0016616]		GO:0005975; GO:0006464; GO:0015031; GO:0016616; GO:0019752		mmu:54122;	13.5308	13.4897	13.6281	13.5552	13.7115	13.9777	13.8132	14.1248	13.9259	14.0412
Opa3_Q505D7	-0.70852	-0.947741	-0.337933	-0.810241	-1.47588	0.779572	0.896367	0.42686	1.67471	0.502806	Opa3	Optic atrophy 3 protein homolog	Q505D7	1.02644	0.000161027	0.00463327	-0.401559	sp|Q505D7|OPA3_MOUSE Optic atrophy 3 protein homolog OS=Mus musculus OX=10090 GN=Opa3 PE=1 SV=1	FUNCTION: May play some role in mitochondrial processes. {ECO:0000250}.	SUBCELLULAR LOCATION: Mitochondrion {ECO:0000250}.		bone development [GO:0060348]; fat cell differentiation [GO:0045444]; mitochondrion morphogenesis [GO:0070584]; neuromuscular process [GO:0050905]; regulation of growth [GO:0040008]; regulation of lipid metabolic process [GO:0019216]; visual perception [GO:0007601]		mitochondrion [GO:0005739]	GO:0005739; GO:0007601; GO:0019216; GO:0040008; GO:0045444; GO:0050905; GO:0060348; GO:0070584		mmu:403187;	15.22	15.1639	15.3069	15.1961	15.04	15.569	15.5964	15.4863	15.7789	15.5041
Ugt2a3_Q8BWQ1	-0.684957	-0.22888	-0.912834	-1.49738	-0.790849	1.05714	0.555598	1.13818	1.43222	-0.068233	Ugt2a3	UDP-glucuronosyltransferase 2A3	Q8BWQ1	1.05946	0.000162807	0.00465067	-0.828438	sp|Q8BWQ1|UD2A3_MOUSE UDP-glucuronosyltransferase 2A3 OS=Mus musculus OX=10090 GN=Ugt2a3 PE=1 SV=1	FUNCTION: UDP-glucuronosyltransferases catalyze phase II biotransformation reactions in which lipophilic substrates are conjugated with glucuronic acid to increase water solubility and enhance excretion. They are of major importance in the conjugation and subsequent elimination of potentially toxic xenobiotics and endogenous compounds (By similarity). {ECO:0000250}.	SUBCELLULAR LOCATION: Membrane {ECO:0000305}; Single-pass type I membrane protein {ECO:0000305}.		cellular glucuronidation [GO:0052695]	glucuronosyltransferase activity [GO:0015020]	integral component of membrane [GO:0016021]; intracellular membrane-bounded organelle [GO:0043231]	GO:0015020; GO:0016021; GO:0043231; GO:0052695	R-MMU-156588;	mmu:72094;	14.0026	14.2321	13.8879	13.5936	13.9493	14.8794	14.6269	14.9202	15.0682	14.313
Pltp_P55065	-1.00555	-1.41714	-0.157896	-1.38351	-0.268197	1.07024	1.20359	0.688575	0.853043	0.416844	Pltp	Phospholipid transfer protein	P55065	1.02792	0.000164265	0.00465067	-0.449469	sp|P55065|PLTP_MOUSE Phospholipid transfer protein OS=Mus musculus OX=10090 GN=Pltp PE=1 SV=1	FUNCTION: Mediates the transfer of phospholipids and free cholesterol from triglyceride-rich lipoproteins (low density lipoproteins or LDL and very low density lipoproteins or VLDL) into high-density lipoproteins (HDL) as well as the exchange of phospholipids between triglyceride-rich lipoproteins themselves (PubMed:7654777, PubMed:7615508, PubMed:10079112,). Facilitates the transfer of a spectru…	SUBCELLULAR LOCATION: Secreted {ECO:0000250|UniProtKB:P55058}. Nucleus {ECO:0000250|UniProtKB:P55058}. Note=Nuclear export is XPO1/CRM1-dependent. {ECO:0000250|UniProtKB:P55058}.		ceramide transport [GO:0035627]; flagellated sperm motility [GO:0030317]; glycolipid transport [GO:0046836]; high-density lipoprotein particle remodeling [GO:0034375]; lipid metabolic process [GO:0006629]; lipid transport [GO:0006869]; phospholipid transport [GO:0015914]; positive regulation of cholesterol efflux [GO:0010875]; vitamin E biosynthetic process [GO:0010189]	ceramide binding [GO:0097001]; ceramide transfer activity [GO:0120017]; cerebroside transfer activity [GO:0140340]; cholesterol transfer activity [GO:0120020]; diacylglyceride transfer activity [GO:0140337]; diacylglycerol binding [GO:0019992]; high-density lipoprotein particle binding [GO:0008035]; low-density lipoprotein particle binding [GO:0030169]; phosphatidic acid binding [GO:0070300]; pho…	extracellular region [GO:0005576]; extracellular space [GO:0005615]; high-density lipoprotein particle [GO:0034364]; nucleus [GO:0005634]	GO:0005576; GO:0005615; GO:0005634; GO:0006629; GO:0006869; GO:0008035; GO:0008429; GO:0008525; GO:0008526; GO:0010189; GO:0010875; GO:0015914; GO:0019992; GO:0030169; GO:0030317; GO:0031210; GO:0034189; GO:0034364; GO:0034375; GO:0035627; GO:0046836; GO:0070300; GO:0097001; GO:0120014; GO:0120017; GO:0120019; GO:0120020; GO:0140337; GO:0140338; GO:0140339; GO:0140340; GO:1901611; GO:1904121; GO:…	R-MMU-8964058;	mmu:18830;	16.0586	15.9494	16.2837	15.9583	16.2544	16.6098	16.6452	16.5084	16.5521	16.4363
Glt8d1_Q6NSU3	-0.776739	-1.07277	-0.735998	-0.627287	-1.05027	0.980311	1.80745	0.803321	0.569004	0.102975	Glt8d1	Glycosyltransferase 8 domain-containing protein 1	Q6NSU3	1.03268	0.000165156	0.00465067	-0.414116	sp|Q6NSU3|GL8D1_MOUSE Glycosyltransferase 8 domain-containing protein 1 OS=Mus musculus OX=10090 GN=Glt8d1 PE=1 SV=1		SUBCELLULAR LOCATION: Membrane {ECO:0000305}; Single-pass type II membrane protein {ECO:0000305}.			transferase activity, transferring glycosyl groups [GO:0016757]	Golgi apparatus [GO:0005794]; integral component of membrane [GO:0016021]	GO:0005794; GO:0016021; GO:0016757		mmu:76485;	12.692	12.6201	12.7019	12.7283	12.6256	13.1187	13.3196	13.0757	13.0188	12.9056
Kdelc2_G5E897	-0.742452	-1.06176	-1.63185	-0.778332	0.0494696	1.23397	1.04692	0.77946	0.87934	0.225232	Kdelc2		G5E897	1.03909	0.000165708	0.00465067	-0.573749	sp|G5E897|PLGT3_MOUSE Protein O-glucosyltransferase 3 OS=Mus musculus OX=10090 GN=Kdelc2 PE=1 SV=1	FUNCTION: Protein glucosyltransferase that catalyzes the transfer of glucose from UDP-glucose to a serine residue within the consensus sequence peptide C-X-N-T-X-G-S-F-X-C. Can also catalyze the transfer of xylose from UDP-xylose but less efficiently. Specifically targets extracellular EGF repeats of proteins such as NOTCH1 and NOTCH3. May regulate the transport of NOTCH1 and NOTCH3 to the plasma…	SUBCELLULAR LOCATION: Endoplasmic reticulum lumen {ECO:0000255|PROSITE-ProRule:PRU10138}.		protein O-linked glycosylation via serine [GO:0018242]	glucosyltransferase activity [GO:0046527]; UDP-glucosyltransferase activity [GO:0035251]; UDP-xylosyltransferase activity [GO:0035252]	endomembrane system [GO:0012505]; endoplasmic reticulum lumen [GO:0005788]	GO:0005788; GO:0012505; GO:0018242; GO:0035251; GO:0035252; GO:0046527		mmu:68304;	14.7076	14.5976	14.4013	14.6952	14.9803	15.3882	15.3238	15.2317	15.2661	15.0408
Bola3_Q8CEI1	-0.357348	-0.156993	-0.789063	-1.56864	-1.30151	1.28347	0.938497	0.985825	0.254654	0.711117	Bola3	BolA-like protein 3	Q8CEI1	1.03703	0.000166775	0.00465067	-0.548895	sp|Q8CEI1|BOLA3_MOUSE BolA-like protein 3 OS=Mus musculus OX=10090 GN=Bola3 PE=1 SV=1	FUNCTION: Acts as a mitochondrial iron-sulfur (Fe-S) cluster assembly factor that facilitates (Fe-S) cluster insertion into a subset of mitochondrial proteins. Probably acts together with NFU1. {ECO:0000250|UniProtKB:P39724, ECO:0000250|UniProtKB:Q53S33}.	SUBCELLULAR LOCATION: Mitochondrion {ECO:0000250|UniProtKB:Q53S33}.				cytosol [GO:0005829]; mitochondrion [GO:0005739]; nuclear body [GO:0016604]	GO:0005739; GO:0005829; GO:0016604		mmu:78653;	14.9792	15.0451	14.8373	14.581	14.6688	15.5187	15.4053	15.4209	15.1805	15.3305
Ikbip_Q9DBZ1	-0.593587	-0.341796	-0.923461	-1.141	-1.40682	1.05585	1.08434	0.726583	0.326747	1.21315	Ikbip	Inhibitor of nuclear factor kappa-B kinase-interacting protein	Q9DBZ1	1.02052	0.000168215	0.00465067	-0.321402	sp|Q9DBZ1|IKIP_MOUSE Inhibitor of nuclear factor kappa-B kinase-interacting protein OS=Mus musculus OX=10090 GN=Ikbip PE=1 SV=2	FUNCTION: Target of p53/TP53 with pro-apoptotic function. {ECO:0000250}.	SUBCELLULAR LOCATION: Endoplasmic reticulum membrane {ECO:0000250}; Single-pass membrane protein {ECO:0000250}.				endoplasmic reticulum [GO:0005783]; endoplasmic reticulum membrane [GO:0005789]; integral component of membrane [GO:0016021]	GO:0005783; GO:0005789; GO:0016021		mmu:67454;	15.715	15.7609	15.6548	15.6152	15.5667	16.0157	16.0209	15.9557	15.8828	16.0444
Nes_Q6P5H2	-1.06597	-1.35425	-0.870259	-1.01899	0.0895272	0.508751	1.39318	1.04558	0.387771	0.884664	Nes	Nestin	Q6P5H2	1.03346	0.000168513	0.00465067	-0.461048	sp|Q6P5H2|NEST_MOUSE Nestin OS=Mus musculus OX=10090 GN=Nes PE=1 SV=1	FUNCTION: Required for brain and eye development. Promotes the disassembly of phosphorylated vimentin intermediate filaments (IF) during mitosis and may play a role in the trafficking and distribution of IF proteins and other cellular factors to daughter cells during progenitor cell division (By similarity). Required for survival, renewal and mitogen-stimulated proliferation of neural progenitor …			brain development [GO:0007420]; cell projection morphogenesis [GO:0048858]; embryonic camera-type eye development [GO:0031076]; G2/M transition of mitotic cell cycle [GO:0000086]; negative regulation of catalytic activity [GO:0043086]; negative regulation of neuron apoptotic process [GO:0043524]; negative regulation of protein binding [GO:0032091]; nervous system development [GO:0007399]; positiv…	CCR5 chemokine receptor binding [GO:0031730]; intermediate filament binding [GO:0019215]	cytoplasm [GO:0005737]; intermediate filament [GO:0005882]	GO:0000086; GO:0005737; GO:0005882; GO:0007399; GO:0007420; GO:0019215; GO:0030844; GO:0031076; GO:0031730; GO:0032091; GO:0043086; GO:0043524; GO:0048858; GO:0072089; GO:2000179		mmu:18008;	13.7203	13.6415	13.7737	13.7331	14.0359	14.1504	14.3919	14.297	14.1173	14.253
Gigyf2_Q6Y7W8	-0.776976	-0.718548	-1.49221	-0.765924	-0.760028	1.08808	0.896751	1.33774	0.563889	0.62723	Gigyf2	PERQ amino acid-rich with GYF domain-containing protein 2	Q6Y7W8	1.01877	0.000169149	0.00465067	-0.285305	sp|Q6Y7W8|GGYF2_MOUSE GRB10-interacting GYF protein 2 OS=Mus musculus OX=10090 GN=Gigyf2 PE=1 SV=2	FUNCTION: Key component of the 4EHP-GYF2 complex, a multiprotein complex that acts as a repressor of translation initiation (PubMed:26763119). In 4EHP-GYF2 the complex, acts as a factor that bridges EIF4E2 to ZFP36/TTP, linking translation repression with mRNA decay (PubMed:26763119). May act cooperatively with GRB10 to regulate tyrosine kinase receptor signaling, including IGF1 and insulin recep…			adult locomotory behavior [GO:0008344]; cellular protein metabolic process [GO:0044267]; feeding behavior [GO:0007631]; homeostasis of number of cells within a tissue [GO:0048873]; insulin-like growth factor receptor signaling pathway [GO:0048009]; mitotic G1 DNA damage checkpoint [GO:0031571]; mRNA destabilization [GO:0061157]; multicellular organism growth [GO:0035264]; musculoskeletal movement…	proline-rich region binding [GO:0070064]	cytoplasm [GO:0005737]; cytoplasmic stress granule [GO:0010494]; cytosol [GO:0005829]; endoplasmic reticulum [GO:0005783]; endosome [GO:0005768]; Golgi apparatus [GO:0005794]; integral component of membrane [GO:0016021]; perikaryon [GO:0043204]; protein-containing complex [GO:0032991]; proximal dendrite [GO:1990635]; vesicle [GO:0031982]	GO:0005737; GO:0005768; GO:0005783; GO:0005794; GO:0005829; GO:0007631; GO:0008344; GO:0009791; GO:0010494; GO:0016021; GO:0016441; GO:0017148; GO:0021522; GO:0031571; GO:0031982; GO:0032991; GO:0035264; GO:0043204; GO:0044267; GO:0048009; GO:0048873; GO:0050881; GO:0050885; GO:0061157; GO:0070064; GO:1990635		mmu:227331;	15.2226	15.2318	15.1096	15.2243	15.2253	15.5173	15.4871	15.5568	15.4345	15.4445
Ggcx_Q9QYC7	-0.991931	-0.773855	0.175293	-1.18264	-1.3724	1.27804	1.01699	0.897333	0.178892	0.774272	Ggcx	Vitamin K-dependent gamma-carboxylase	Q9QYC7	1.04338	0.000171172	0.00468029	-0.621023	sp|Q9QYC7|VKGC_MOUSE Vitamin K-dependent gamma-carboxylase OS=Mus musculus OX=10090 GN=Ggcx PE=1 SV=1	FUNCTION: Mediates the vitamin K-dependent carboxylation of glutamate residues to calcium-binding gamma-carboxyglutamate (Gla) residues with the concomitant conversion of the reduced hydroquinone form of vitamin K to vitamin K epoxide.	SUBCELLULAR LOCATION: Endoplasmic reticulum membrane {ECO:0000250}; Multi-pass membrane protein {ECO:0000250}.		peptidyl-glutamic acid carboxylation [GO:0017187]	gamma-glutamyl carboxylase activity [GO:0008488]; vitamin binding [GO:0019842]	endoplasmic reticulum membrane [GO:0005789]; integral component of membrane [GO:0016021]; intracellular membrane-bounded organelle [GO:0043231]	GO:0005789; GO:0008488; GO:0016021; GO:0017187; GO:0019842; GO:0043231	R-MMU-159740;	mmu:56316;	14.2536	14.3352	14.6907	14.1821	14.1111	15.1037	15.0059	14.9611	14.6921	14.915
Mcpt4_P21812	-0.398417	-1.04981	-1.56918	-0.823486	-0.366957	1.35522	0.948805	1.20905	0.23769	0.457073	Mcpt4	Mast cell protease 4	P21812	1.03069	0.000174586	0.00474739	-0.471156	sp|P21812|MCPT4_MOUSE Mast cell protease 4 OS=Mus musculus OX=10090 GN=Mcpt4 PE=1 SV=1	FUNCTION: Has chymotrypsin-like activity. Hydrolyzes the amide bonds of synthetic substrates having Tyr and Phe residues at the P1 position. Preferentially hydrolyzes the 'Tyr-4-|-Ile-5' bond of angiotensin I and the 'Phe-20-|-Ala-21' bond of amyloid beta-protein, and is less active towards the 'Phe-8-|-His-9' bond of angiotensin I and the 'Phe-4-|-Ala-5' and 'Tyr-10-|-Glu-11' bonds of amyloid be…			proteolysis [GO:0006508]; regulation of angiotensin levels in blood [GO:0002002]	peptidase activity [GO:0008233]; serine-type endopeptidase activity [GO:0004252]	extracellular space [GO:0005615]	GO:0002002; GO:0004252; GO:0005615; GO:0006508; GO:0008233		mmu:17227;	15.474	15.2917	15.1463	15.355	15.4828	15.9649	15.8512	15.924	15.6521	15.7135
Ech1_O35459	-0.583236	-0.775507	-0.486355	-1.56304	-1.01167	1.25026	1.21134	0.530928	0.603209	0.824073	Ech1	Delta(3,5)-Delta(2,4)-dienoyl-CoA isomerase, mitochondrial	O35459	1.01722	0.000177248	0.00479068	-0.312738	sp|O35459|ECH1_MOUSE Delta(3,5)-Delta(2,4)-dienoyl-CoA isomerase, mitochondrial OS=Mus musculus OX=10090 GN=Ech1 PE=1 SV=1	FUNCTION: Isomerization of 3-trans,5-cis-dienoyl-CoA to 2-trans,4-trans-dienoyl-CoA. {ECO:0000250|UniProtKB:Q62651}.	SUBCELLULAR LOCATION: Mitochondrion {ECO:0000250|UniProtKB:Q62651}. Peroxisome {ECO:0000250|UniProtKB:Q62651}.		fatty acid beta-oxidation [GO:0006635]	delta3,5-delta2,4-dienoyl-CoA isomerase activity [GO:0051750]	mitochondrion [GO:0005739]; peroxisome [GO:0005777]	GO:0005739; GO:0005777; GO:0006635; GO:0051750	R-MMU-9033241;	mmu:51798;	18.2116	18.1776	18.2288	18.0383	18.1359	18.536	18.5291	18.4087	18.4215	18.4606
Gpc4_P51655	-0.944964	-0.278283	-0.986173	-1.59422	-0.431956	1.23707	0.478811	1.37544	0.465289	0.678988	Gpc4	Glypican-4;Secreted glypican-4	P51655	1.02722	0.000178538	0.00479068	-0.430837	sp|P51655|GPC4_MOUSE Glypican-4 OS=Mus musculus OX=10090 GN=Gpc4 PE=1 SV=2	FUNCTION: Cell surface proteoglycan that bears heparan sulfate. May be involved in the development of kidney tubules and of the central nervous system.	SUBCELLULAR LOCATION: Cell membrane; Lipid-anchor, GPI-anchor; Extracellular side.; SUBCELLULAR LOCATION: [Secreted glypican-4]: Secreted, extracellular space {ECO:0000250}.		cell migration [GO:0016477]; regulation of neurotransmitter receptor localization to postsynaptic specialization membrane [GO:0098696]; regulation of presynapse assembly [GO:1905606]; regulation of protein localization to membrane [GO:1905475]; regulation of signal transduction [GO:0009966]; synaptic membrane adhesion [GO:0099560]; Wnt signaling pathway [GO:0016055]		anchored component of presynaptic membrane [GO:0099026]; cell surface [GO:0009986]; collagen-containing extracellular matrix [GO:0062023]; external side of plasma membrane [GO:0009897]; extracellular region [GO:0005576]; extracellular space [GO:0005615]; glutamatergic synapse [GO:0098978]; Golgi lumen [GO:0005796]; synapse [GO:0045202]	GO:0005576; GO:0005615; GO:0005796; GO:0009897; GO:0009966; GO:0009986; GO:0016055; GO:0016477; GO:0045202; GO:0062023; GO:0098696; GO:0098978; GO:0099026; GO:0099560; GO:1905475; GO:1905606	R-MMU-1971475;R-MMU-2022928;R-MMU-2024096;R-MMU-975634;	mmu:14735;	15.8055	15.975	15.795	15.6404	15.9359	16.3604	16.1675	16.3956	16.1641	16.2184
Cisd3_B1AR13	-0.665452	-1.21145	-0.396948	-0.898625	-1.24398	1.46675	1.07952	0.801208	0.687736	0.381239	Cisd3	CDGSH iron-sulfur domain-containing protein 3, mitochondrial	B1AR13	1.02267	0.000180542	0.00479068	-0.31283	sp|B1AR13|CISD3_MOUSE CDGSH iron-sulfur domain-containing protein 3, mitochondrial OS=Mus musculus OX=10090 GN=Cisd3 PE=1 SV=1	FUNCTION: Can transfer its iron-sulfur clusters to the apoferrodoxins FDX1 and FDX2. Contributes to mitochondrial iron homeostasis and in maintaining normal levels of free iron and reactive oxygen species, and thereby contributes to normal mitochondrial function. {ECO:0000250|UniProtKB:P0C7P0}.	SUBCELLULAR LOCATION: Mitochondrion {ECO:0000250|UniProtKB:P0C7P0}.		protein maturation by [2Fe-2S] cluster transfer [GO:0106034]	2 iron, 2 sulfur cluster binding [GO:0051537]; metal ion binding [GO:0046872]	mitochondrion [GO:0005739]	GO:0005739; GO:0046872; GO:0051537; GO:0106034		mmu:217149;	13.8387	13.742	13.8862	13.7974	13.7362	14.2162	14.1477	14.0984	14.0783	14.024
Dync1i2_O88487	-0.434865	-0.529627	-0.662945	-1.12962	-1.48365	0.918867	1.43522	1.06737	0.0671441	0.752104	Dync1i2	Cytoplasmic dynein 1 intermediate chain 2	O88487	1.0242	0.000181716	0.00479068	-0.422385	sp|O88487|DC1I2_MOUSE Cytoplasmic dynein 1 intermediate chain 2 OS=Mus musculus OX=10090 GN=Dync1i2 PE=1 SV=1	FUNCTION: Acts as one of several non-catalytic accessory components of the cytoplasmic dynein 1 complex that are thought to be involved in linking dynein to cargos and to adapter proteins that regulate dynein function (By similarity). Cytoplasmic dynein 1 acts as a motor for the intracellular retrograde motility of vesicles and organelles along microtubules (By similarity). The intermediate chain…	SUBCELLULAR LOCATION: Cytoplasm, cytoskeleton {ECO:0000269|PubMed:28619825}. Cytoplasm {ECO:0000269|PubMed:28619825}. Note=Detected in the cytoplasm of pachytene spermatocytes. Localizes to the manchette in elongating spermatids. {ECO:0000269|PubMed:28619825}.		microtubule-based movement [GO:0007018]; negative regulation of neuron projection development [GO:0010977]; transport along microtubule [GO:0010970]	dynein heavy chain binding [GO:0045504]; dynein light chain binding [GO:0045503]; motor activity [GO:0003774]; protein-containing complex binding [GO:0044877]	cytoplasm [GO:0005737]; cytoplasmic dynein complex [GO:0005868]; microtubule [GO:0005874]; outer dynein arm [GO:0036157]; vesicle [GO:0031982]	GO:0003774; GO:0005737; GO:0005868; GO:0005874; GO:0007018; GO:0010970; GO:0010977; GO:0031982; GO:0036157; GO:0044877; GO:0045503; GO:0045504	R-MMU-141444;R-MMU-2132295;R-MMU-2467813;R-MMU-2500257;R-MMU-2565942;R-MMU-3371497;R-MMU-380259;R-MMU-380270;R-MMU-380284;R-MMU-380320;R-MMU-5620912;R-MMU-5663220;R-MMU-6807878;R-MMU-6811436;R-MMU-68877;R-MMU-8854518;R-MMU-9646399;R-MMU-9648025;	mmu:13427;	17.5586	17.535	17.5018	17.3856	17.2974	17.8957	18.0242	17.9327	17.6836	17.8541
Txlna_Q6PAM1	-0.532135	-1.22466	-1.43298	-0.817958	-0.12977	1.01548	1.00208	1.36772	-0.00386412	0.756088	Txlna	Alpha-taxilin	Q6PAM1	1.04198	0.000182562	0.00479068	-0.617823	sp|Q6PAM1|TXLNA_MOUSE Alpha-taxilin OS=Mus musculus OX=10090 GN=Txlna PE=1 SV=1	FUNCTION: May be involved in intracellular vesicle traffic and potentially in calcium-dependent exocytosis in neuroendocrine cells. {ECO:0000250}.			B cell activation [GO:0042113]; exocytosis [GO:0006887]	syntaxin binding [GO:0019905]	cytoplasm [GO:0005737]	GO:0005737; GO:0006887; GO:0019905; GO:0042113	R-MMU-449836;	mmu:109658;	14.8285	14.5699	14.4922	14.7218	14.9787	15.4062	15.4012	15.5377	15.0257	15.3094
Mtch1_Q791T5	-0.714552	-0.69154	-0.226935	-1.37675	-1.35027	1.23953	0.826358	1.08933	0.368658	0.836175	Mtch1	Mitochondrial carrier homolog 1	Q791T5	1.02429	0.000183097	0.00479068	-0.336165	sp|Q791T5|MTCH1_MOUSE Mitochondrial carrier homolog 1 OS=Mus musculus OX=10090 GN=Mtch1 PE=1 SV=1	FUNCTION: Potential mitochondrial transporter. May play a role in apoptosis (By similarity). {ECO:0000250}.	SUBCELLULAR LOCATION: Mitochondrion inner membrane {ECO:0000305}; Multi-pass membrane protein {ECO:0000305}.		activation of cysteine-type endopeptidase activity involved in apoptotic process [GO:0006919]; apoptotic process [GO:0006915]; positive regulation of apoptotic process [GO:0043065]		integral component of membrane [GO:0016021]; mitochondrial inner membrane [GO:0005743]; mitochondrion [GO:0005739]	GO:0005739; GO:0005743; GO:0006915; GO:0006919; GO:0016021; GO:0043065		mmu:56462;	13.8725	13.8769	13.9664	13.7448	13.7499	14.2491	14.1695	14.2202	14.0813	14.1714
Exoc8_Q6PGF7	-0.14416	-0.536673	-1.38936	-1.20682	-0.911667	1.44235	0.541797	1.28817	0.357713	0.558641	Exoc8	Exocyst complex component 8	Q6PGF7	1.02997	0.000183255	0.00479068	-0.490683	sp|Q6PGF7|EXOC8_MOUSE Exocyst complex component 8 OS=Mus musculus OX=10090 GN=Exoc8 PE=1 SV=1	FUNCTION: Component of the exocyst complex involved in the docking of exocytic vesicles with fusion sites on the plasma membrane. {ECO:0000250}.	SUBCELLULAR LOCATION: Cytoplasm {ECO:0000250|UniProtKB:O54924}. Cytoplasm, perinuclear region {ECO:0000250|UniProtKB:O54924}. Cell projection, growth cone {ECO:0000250|UniProtKB:O54924}. Cell projection {ECO:0000250|UniProtKB:O54924}. Note=Binds lipids with phosphatidylinositol 3,4,5-trisphosphate groups (By similarity). Perinuclear in undifferentiated PC12 cells. Redistributes to growing neurite…		cellular protein localization [GO:0034613]; endosome organization [GO:0007032]; exocytosis [GO:0006887]; extracellular matrix disassembly [GO:0022617]; Golgi to plasma membrane transport [GO:0006893]; protein localization [GO:0008104]; protein transport [GO:0015031]	phosphatidylinositol binding [GO:0035091]; Ral GTPase binding [GO:0017160]	cell leading edge [GO:0031252]; cytosol [GO:0005829]; exocyst [GO:0000145]; growth cone [GO:0030426]; late endosome [GO:0005770]; perinuclear region of cytoplasm [GO:0048471]; plasma membrane [GO:0005886]	GO:0000145; GO:0005770; GO:0005829; GO:0005886; GO:0006887; GO:0006893; GO:0007032; GO:0008104; GO:0015031; GO:0017160; GO:0022617; GO:0030426; GO:0031252; GO:0034613; GO:0035091; GO:0048471	R-MMU-264876;R-MMU-5620916;	mmu:102058;	16.576	16.4611	16.2114	16.2648	16.3513	17.0407	16.7769	16.9955	16.723	16.7819
Dnajb1_Q9QYJ3	0.0763839	-0.872873	-0.827816	-1.2645	-1.40435	0.878462	0.748266	1.21369	0.967145	0.4856	Dnajb1	DnaJ homolog subfamily B member 1	Q9QYJ3	1.0246	0.000183922	0.00479068	-0.375275	sp|Q9QYJ3|DNJB1_MOUSE DnaJ homolog subfamily B member 1 OS=Mus musculus OX=10090 GN=Dnajb1 PE=1 SV=3	FUNCTION: Interacts with HSP70 and can stimulate its ATPase activity. Stimulates the association between HSC70 and HIP. Negatively regulates heat shock-induced HSF1 transcriptional activity during the attenuation and recovery phase period of the heat shock response. Stimulates ATP hydrolysis and the folding of unfolded proteins mediated by HSPA1A/B (in vitro). {ECO:0000250|UniProtKB:P25685}.	SUBCELLULAR LOCATION: Cytoplasm {ECO:0000250|UniProtKB:P25685}. Nucleus {ECO:0000250|UniProtKB:P25685}. Nucleus, nucleolus {ECO:0000250|UniProtKB:P25685}. Note=Translocates rapidly from the cytoplasm to the nucleus, and especially to the nucleoli, upon heat shock. {ECO:0000250|UniProtKB:P25685}.		chaperone cofactor-dependent protein refolding [GO:0051085]; negative regulation of inclusion body assembly [GO:0090084]; negative regulation of transcription by RNA polymerase II [GO:0000122]; negative regulation of transcription from RNA polymerase II promoter in response to stress [GO:0097201]; positive regulation of ATPase activity [GO:0032781]; protein folding [GO:0006457]	ATPase activator activity [GO:0001671]; ATPase binding [GO:0051117]; chaperone binding [GO:0051087]; Hsp70 protein binding [GO:0030544]; protein folding chaperone [GO:0044183]; transcription corepressor activity [GO:0003714]; unfolded protein binding [GO:0051082]	cytoplasm [GO:0005737]; cytosol [GO:0005829]; dendritic spine [GO:0043197]; glutamatergic synapse [GO:0098978]; neuronal cell body [GO:0043025]; nucleolus [GO:0005730]; nucleoplasm [GO:0005654]; postsynapse [GO:0098794]; postsynaptic cytosol [GO:0099524]; postsynaptic density [GO:0014069]; sperm head [GO:0061827]	GO:0000122; GO:0001671; GO:0003714; GO:0005654; GO:0005730; GO:0005737; GO:0005829; GO:0006457; GO:0014069; GO:0030544; GO:0032781; GO:0043025; GO:0043197; GO:0044183; GO:0051082; GO:0051085; GO:0051087; GO:0051117; GO:0061827; GO:0090084; GO:0097201; GO:0098794; GO:0098978; GO:0099524	R-MMU-3371453;R-MMU-3371497;R-MMU-3371568;R-MMU-3371571;R-MMU-5687128;	mmu:81489;	15.4591	15.2516	15.2615	15.166	15.1355	15.6343	15.6059	15.7076	15.6537	15.5485
Fpr2_O88536	1.33321	0.954914	0.77556	1.24454	-0.212924	-0.897989	-1.14221	-1.27231	-0.192927	-0.589866	Fpr2	Formyl peptide receptor 2	O88536	1.07068	0.000185509	0.00480671	0.847345	sp|O88536|FPR2_MOUSE Formyl peptide receptor 2 OS=Mus musculus OX=10090 GN=Fpr2 PE=1 SV=1	FUNCTION: High affinity receptor for N-formyl-methionyl peptides (FMLP), which are powerful neutrophil chemotactic factors (PubMed:12218158, PubMed:10477558, PubMed:19387439). Stimulates chemotaxis in immune cells to site of infection or tissue damage upon recognition of several ligands, such as FMLP, or ligand involved in cell damage, disease or inflammation (PubMed:10477558, PubMed:19497865). R…	SUBCELLULAR LOCATION: Cell membrane {ECO:0000250|UniProtKB:P25090}; Multi-pass membrane protein {ECO:0000305}. Note=Associates with Amyloid-beta protein 42, product of APP, at the cell surface and the complex is then rapidly internalized. {ECO:0000250|UniProtKB:P25090}.		adenylate cyclase-inhibiting G protein-coupled receptor signaling pathway [GO:0007193]; astrocyte activation [GO:0048143]; calcium-mediated signaling [GO:0019722]; cell surface receptor signaling pathway [GO:0007166]; cellular response to amyloid-beta [GO:1904646]; complement receptor mediated signaling pathway [GO:0002430]; defense response to bacterium [GO:0042742]; G protein-coupled receptor s…	amyloid-beta binding [GO:0001540]; cargo receptor activity [GO:0038024]; complement receptor activity [GO:0004875]; G protein-coupled receptor activity [GO:0004930]; N-formyl peptide receptor activity [GO:0004982]; RAGE receptor binding [GO:0050786]; scavenger receptor binding [GO:0005124]; signaling receptor activity [GO:0038023]	cytoplasm [GO:0005737]; integral component of membrane [GO:0016021]; plasma membrane [GO:0005886]	GO:0001540; GO:0001774; GO:0001934; GO:0002430; GO:0002768; GO:0004875; GO:0004930; GO:0004982; GO:0005124; GO:0005737; GO:0005886; GO:0006898; GO:0006954; GO:0007166; GO:0007186; GO:0007193; GO:0007200; GO:0007204; GO:0014068; GO:0016021; GO:0019722; GO:0032930; GO:0038023; GO:0038024; GO:0042742; GO:0043524; GO:0045089; GO:0045745; GO:0048143; GO:0050728; GO:0050766; GO:0050786; GO:0050918; GO:…	R-MMU-416476;R-MMU-418594;R-MMU-444473;R-MMU-6798695;	mmu:14289;	13.1024	12.9067	12.814	13.0565	12.3026	11.9483	11.822	11.7547	12.313	12.1077
Epb41l1_Q9Z2H5	-1.01473	-0.774748	-0.791833	-0.908851	-1.02562	1.05428	1.03796	1.38293	0.186834	0.853764	Epb41l1	Band 4.1-like protein 1	Q9Z2H5	1.01708	0.000192514	0.00496224	-0.278674	sp|Q9Z2H5|E41L1_MOUSE Band 4.1-like protein 1 OS=Mus musculus OX=10090 GN=Epb41l1 PE=1 SV=2	FUNCTION: May function to confer stability and plasticity to neuronal membrane via multiple interactions, including the spectrin-actin-based cytoskeleton, integral membrane channels and membrane-associated guanylate kinases.	SUBCELLULAR LOCATION: Cytoplasm, cytoskeleton.		actomyosin structure organization [GO:0031032]; cortical actin cytoskeleton organization [GO:0030866]	actin binding [GO:0003779]; signaling receptor binding [GO:0005102]; structural molecule activity [GO:0005198]	cytoplasm [GO:0005737]; cytoskeleton [GO:0005856]; plasma membrane [GO:0005886]; postsynaptic density [GO:0014069]; protein-containing complex [GO:0032991]; synaptic membrane [GO:0097060]	GO:0003779; GO:0005102; GO:0005198; GO:0005737; GO:0005856; GO:0005886; GO:0014069; GO:0030866; GO:0031032; GO:0032991; GO:0097060	R-MMU-399719;R-MMU-6794361;	mmu:13821;	16.3009	16.3379	16.3352	16.3172	16.2992	16.6201	16.6175	16.6708	16.4862	16.5891
Golim4_Q8BXA1	-0.863638	-1.15068	-0.524344	-0.618541	-0.975949	1.0864	0.471072	1.55394	-0.189542	1.21128	Golim4	Golgi integral membrane protein 4	Q8BXA1	1.03924	0.00019454	0.00498059	-0.602095	sp|Q8BXA1|GOLI4_MOUSE Golgi integral membrane protein 4 OS=Mus musculus OX=10090 GN=Golim4 PE=1 SV=1	FUNCTION: Plays a role in endosome to Golgi protein trafficking; mediates protein transport along the late endosome-bypass pathway from the early endosome to the Golgi. {ECO:0000250}.	SUBCELLULAR LOCATION: Golgi apparatus, Golgi stack membrane {ECO:0000250}; Single-pass type II membrane protein {ECO:0000250}. Endosome membrane {ECO:0000250}; Single-pass type II membrane protein {ECO:0000250}. Membrane {ECO:0000250|UniProtKB:O00461}; Lipid-anchor {ECO:0000250|UniProtKB:O00461}. Note=Localizes to cis and medial Golgi cisternae. Probably cycles between early Golgi and distal comp…				endosome membrane [GO:0010008]; Golgi apparatus [GO:0005794]; Golgi cisterna membrane [GO:0032580]; integral component of membrane [GO:0016021]	GO:0005794; GO:0010008; GO:0016021; GO:0032580		mmu:73124;	15.329	15.2245	15.4526	15.4183	15.2881	16.0392	15.8151	16.2094	15.5745	16.0847
Nup43_P59235	-0.900056	-1.75938	-1.22399	-0.291783	0.0686523	0.576042	0.828759	1.04726	0.932975	0.721528	Nup43	Nucleoporin Nup43	P59235	1.04695	0.000195238	0.00498059	-0.71427	sp|P59235|NUP43_MOUSE Nucleoporin Nup43 OS=Mus musculus OX=10090 GN=Nup43 PE=1 SV=2	FUNCTION: Component of the Nup107-160 subcomplex of the nuclear pore complex (NPC). The Nup107-160 subcomplex is required for the assembly of a functional NPC. The Nup107-160 subcomplex is also required for normal kinetochore microtubule attachment, mitotic progression and chromosome segregation (By similarity). {ECO:0000250}.	SUBCELLULAR LOCATION: Chromosome, centromere, kinetochore {ECO:0000250}. Nucleus, nuclear pore complex {ECO:0000250}.		cell cycle [GO:0007049]; cell division [GO:0051301]; chromosome segregation [GO:0007059]; mRNA transport [GO:0051028]; protein transport [GO:0015031]		condensed chromosome kinetochore [GO:0000777]; nuclear pore outer ring [GO:0031080]	GO:0000777; GO:0007049; GO:0007059; GO:0015031; GO:0031080; GO:0051028; GO:0051301	R-MMU-141444;R-MMU-159227;R-MMU-159230;R-MMU-159231;R-MMU-159236;R-MMU-170822;R-MMU-191859;R-MMU-2467813;R-MMU-2500257;R-MMU-3108214;R-MMU-3232142;R-MMU-3301854;R-MMU-3371453;R-MMU-4085377;R-MMU-4551638;R-MMU-4570464;R-MMU-4615885;R-MMU-5578749;R-MMU-5663220;R-MMU-68877;R-MMU-9615933;R-MMU-9648025;	mmu:69912;	15.1787	14.805	15.0379	15.4432	15.5999	15.8206	15.9305	16.0255	15.9758	15.8838
Eif4a2_P10630	-0.707427	-0.851607	-1.19465	-0.998183	-0.505789	1.13684	0.663396	1.70877	0.0894445	0.659206	Eif4a2	Eukaryotic initiation factor 4A-II;Eukaryotic initiation factor 4A-II, N-terminally processed	P10630	1.02653	0.000197207	0.00500501	-0.394483	sp|P10630|IF4A2_MOUSE Eukaryotic initiation factor 4A-II OS=Mus musculus OX=10090 GN=Eif4a2 PE=1 SV=2	FUNCTION: ATP-dependent RNA helicase which is a subunit of the eIF4F complex involved in cap recognition and is required for mRNA binding to ribosome. In the current model of translation initiation, eIF4A unwinds RNA secondary structures in the 5'-UTR of mRNAs which is necessary to allow efficient binding of the small ribosomal subunit, and subsequent scanning for the initiator codon.			cellular response to leukemia inhibitory factor [GO:1990830]; cytoplasmic translational initiation [GO:0002183]; negative regulation of RNA-directed 5'-3' RNA polymerase activity [GO:1900260]	ATPase activity [GO:0016887]; ATP binding [GO:0005524]; RNA helicase activity [GO:0003724]; translation initiation factor activity [GO:0003743]	perinuclear region of cytoplasm [GO:0048471]	GO:0002183; GO:0003724; GO:0003743; GO:0005524; GO:0016887; GO:0048471; GO:1900260; GO:1990830	R-MMU-1169408;R-MMU-156827;R-MMU-429947;R-MMU-72649;R-MMU-72662;R-MMU-72702;R-MMU-72706;	mmu:13682;	14.9014	14.868	14.7885	14.8341	14.9481	15.3286	15.2189	15.4611	15.086	15.218
Erbb2ip_Q80TH2	-0.464979	-0.724636	-1.85622	-0.852611	-0.296264	0.702945	1.34308	1.04246	0.583399	0.522832	Erbb2ip	Protein LAP2	Q80TH2	1.03507	0.000199743	0.0050435	-0.461423	sp|Q80TH2|ERBIN_MOUSE Erbin OS=Mus musculus OX=10090 GN=Erbin PE=1 SV=3	FUNCTION: Acts as an adapter for the receptor ERBB2, in epithelia. By binding the unphosphorylated ERBB2 'Tyr-1248' receptor, it may contribute to stabilize this unphosphorylated state (By similarity). Inhibits NOD2-dependent NF-kappa-B signaling and proinflammatory cytokine secretion (PubMed:16203728). {ECO:0000250|UniProtKB:Q96RT1, ECO:0000269|PubMed:16203728}.	SUBCELLULAR LOCATION: Cell junction, hemidesmosome {ECO:0000250|UniProtKB:Q96RT1}. Nucleus membrane {ECO:0000269|PubMed:18802028}. Basolateral cell membrane {ECO:0000269|PubMed:16203728}. Note=Found in hemidesmosomes, which are cell-substrate adhesion complexes in stratified epithelia. In transfected cells, either diffusely distributed over the cytoplasm or concentrated at the basolateral membran…		cellular response to tumor necrosis factor [GO:0071356]; negative regulation of monocyte chemotactic protein-1 production [GO:0071638]; negative regulation of NF-kappaB transcription factor activity [GO:0032088]; negative regulation of nucleotide-binding oligomerization domain containing 2 signaling pathway [GO:0070433]; positive regulation of Ras protein signal transduction [GO:0046579]; protein…	ErbB-2 class receptor binding [GO:0005176]; signaling receptor binding [GO:0005102]	basolateral plasma membrane [GO:0016323]; cell junction [GO:0030054]; cytoplasm [GO:0005737]; glutamatergic synapse [GO:0098978]; hemidesmosome [GO:0030056]; nuclear membrane [GO:0031965]; nuclear speck [GO:0016607]; nucleus [GO:0005634]; plasma membrane [GO:0005886]; postsynapse [GO:0098794]	GO:0005102; GO:0005176; GO:0005634; GO:0005737; GO:0005886; GO:0006605; GO:0007165; GO:0016323; GO:0016607; GO:0030054; GO:0030056; GO:0031965; GO:0032088; GO:0032495; GO:0032496; GO:0046579; GO:0070433; GO:0071356; GO:0071638; GO:0098794; GO:0098978; GO:0099072	R-MMU-1227986;R-MMU-8863795;R-MMU-9652282;	mmu:59079;	13.26	13.1886	12.8774	13.1534	13.3064	13.5811	13.7572	13.6745	13.5483	13.5316
Kpna4_O35343	-1.07099	-0.505187	-1.09114	-1.08325	-0.56243	0.825865	1.20675	1.47949	0.0333541	0.767549	Kpna4	Importin subunit alpha-3	O35343	1.02321	0.000201743	0.00506814	-0.352905	sp|O35343|IMA3_MOUSE Importin subunit alpha-3 OS=Mus musculus OX=10090 GN=Kpna4 PE=1 SV=1	FUNCTION: Functions in nuclear protein import as an adapter protein for nuclear receptor KPNB1. Binds specifically and directly to substrates containing either a simple or bipartite NLS motif. Docking of the importin/substrate complex to the nuclear pore complex (NPC) is mediated by KPNB1 through binding to nucleoporin FxFG repeats and the complex is subsequently translocated through the pore by …	SUBCELLULAR LOCATION: Cytoplasm {ECO:0000250}. Nucleus {ECO:0000250}.		NLS-bearing protein import into nucleus [GO:0006607]; protein import into nucleus [GO:0006606]; response to hydrogen peroxide [GO:0042542]	nuclear import signal receptor activity [GO:0061608]; nuclear localization sequence binding [GO:0008139]	cytoplasm [GO:0005737]; nuclear membrane [GO:0031965]; nucleoplasm [GO:0005654]; nucleus [GO:0005634]	GO:0005634; GO:0005654; GO:0005737; GO:0006606; GO:0006607; GO:0008139; GO:0031965; GO:0042542; GO:0061608		mmu:16649;	15.1606	15.2763	15.1564	15.1581	15.2646	15.5486	15.6265	15.6823	15.3865	15.5367
Dhrs1_Q99L04	-0.841929	-1.23162	-0.451073	-1.19882	-0.814158	1.03799	0.92558	1.29878	0.773052	0.502198	Dhrs1	Dehydrogenase/reductase SDR family member 1	Q99L04	1.01474	0.000204518	0.00511191	-0.27075	sp|Q99L04|DHRS1_MOUSE Dehydrogenase/reductase SDR family member 1 OS=Mus musculus OX=10090 GN=Dhrs1 PE=1 SV=1					oxidoreductase activity [GO:0016491]	endoplasmic reticulum [GO:0005783]; mitochondrial inner membrane [GO:0005743]; mitochondrion [GO:0005739]	GO:0005739; GO:0005743; GO:0005783; GO:0016491		mmu:52585;	18.3737	18.3156	18.432	18.3205	18.3779	18.6542	18.6374	18.6931	18.6146	18.5742
Svil_Q8K4L3	-0.97911	-1.01238	-0.535049	-0.85882	-1.00439	0.726506	1.35733	1.51744	0.402872	0.385603	Svil	Supervillin	Q8K4L3	1.01959	0.000205586	0.0051128	-0.314579	sp|Q8K4L3|SVIL_MOUSE Supervillin OS=Mus musculus OX=10090 GN=Svil PE=1 SV=1	FUNCTION: [Isoform 1]: Forms a high-affinity link between the actin cytoskeleton and the membrane. Is among the first costameric proteins to assemble during myogenesis and it contributes to myogenic membrane structure and differentiation. Appears to be involved in myosin II assembly. May modulate myosin II regulation through MLCK during cell spreading, an initial step in cell migration. May play …	SUBCELLULAR LOCATION: Cell membrane {ECO:0000250|UniProtKB:O95425}; Peripheral membrane protein {ECO:0000250|UniProtKB:O95425}; Cytoplasmic side {ECO:0000250|UniProtKB:O95425}. Cytoplasm, cytoskeleton {ECO:0000250|UniProtKB:O95425}. Cell projection, invadopodium {ECO:0000250|UniProtKB:O95425}. Cell projection, podosome {ECO:0000250|UniProtKB:O95425}. Midbody {ECO:0000250|UniProtKB:O46385}. Cleava…		actin filament severing [GO:0051014]; actin polymerization or depolymerization [GO:0008154]; barbed-end actin filament capping [GO:0051016]; positive regulation of cytokinesis [GO:0032467]; skeletal muscle tissue development [GO:0007519]	actin filament binding [GO:0051015]; phosphatidylinositol-4,5-bisphosphate binding [GO:0005546]	actin cytoskeleton [GO:0015629]; cell junction [GO:0030054]; cleavage furrow [GO:0032154]; costamere [GO:0043034]; cytoplasm [GO:0005737]; cytosol [GO:0005829]; invadopodium [GO:0071437]; microtubule minus-end [GO:0036449]; midbody [GO:0030496]; nucleus [GO:0005634]; plasma membrane [GO:0005886]; podosome [GO:0002102]	GO:0002102; GO:0005546; GO:0005634; GO:0005737; GO:0005829; GO:0005886; GO:0007519; GO:0008154; GO:0015629; GO:0030054; GO:0030496; GO:0032154; GO:0032467; GO:0036449; GO:0043034; GO:0051014; GO:0051015; GO:0051016; GO:0071437		mmu:225115;	16.036	16.03	16.1156	16.0575	16.0315	16.3416	16.4546	16.4833	16.2836	16.2805
Mtmr1_Q9Z2C4	-0.570792	-1.32083	-1.13359	-0.633345	-0.403531	1.34731	1.26049	0.231263	1.27301	-0.0499934	Mtmr1	Myotubularin-related protein 1	Q9Z2C4	1.08315	0.000210581	0.00517096	-1.05884	sp|Q9Z2C4|MTMR1_MOUSE Myotubularin-related protein 1 OS=Mus musculus OX=10090 GN=Mtmr1 PE=1 SV=1	FUNCTION: Lipid phosphatase that has high specificity for phosphatidylinositol 3-phosphate and has no activity with phosphatidylinositol 4-phosphate, phosphatidylinositol (4,5)-bisphosphate and phosphatidylinositol (3,4,5)-trisphosphate (PubMed:12217958). Activity with phosphatidylinositol (3,5)-bisphosphate is controversial; it has been shown for the human ortholog (By similarity). In contrast, …	SUBCELLULAR LOCATION: Cell membrane {ECO:0000269|PubMed:12217958}; Peripheral membrane protein {ECO:0000269|PubMed:12217958}; Cytoplasmic side {ECO:0000269|PubMed:12217958}. Cytoplasm {ECO:0000269|PubMed:12217958}.		phosphatidylinositol dephosphorylation [GO:0046856]; regulation of phosphatidylinositol dephosphorylation [GO:0060304]	phosphatidylinositol-3,5-bisphosphate 3-phosphatase activity [GO:0052629]; phosphatidylinositol-3-phosphatase activity [GO:0004438]; protein homodimerization activity [GO:0042803]; protein tyrosine phosphatase activity [GO:0004725]	cytoplasm [GO:0005737]; plasma membrane [GO:0005886]	GO:0004438; GO:0004725; GO:0005737; GO:0005886; GO:0042803; GO:0046856; GO:0052629; GO:0060304	R-MMU-1660499;	mmu:53332;	12.8916	12.4028	12.5248	12.8508	13.0005	14.1415	14.0849	13.4142	14.0931	13.2309
Heph_Q9Z0Z4	-0.727436	-0.517566	-1.01578	-1.47599	-0.352125	1.66851	0.581323	1.17091	0.057939	0.610215	Heph	Hephaestin	Q9Z0Z4	1.05358	0.000210812	0.00517096	-0.757145	sp|Q9Z0Z4|HEPH_MOUSE Hephaestin OS=Mus musculus OX=10090 GN=Heph PE=1 SV=3	FUNCTION: May function as a ferroxidase for ferrous (II) to ferric ion (III) conversion and may be involved in copper transport and homeostasis. Implicated in iron homeostasis and may mediate iron efflux associated to ferroportin 1.	SUBCELLULAR LOCATION: Membrane {ECO:0000305}; Single-pass type I membrane protein {ECO:0000305}.	DISEASE: Note=Defects in Heph are a cause of the sex-linked anemia (sla) that is characterized by moderate to severe microcytic hypochronic anemia.	cellular iron ion homeostasis [GO:0006879]; copper ion transport [GO:0006825]; iron ion homeostasis [GO:0055072]; iron ion transport [GO:0006826]	copper ion binding [GO:0005507]; ferrous iron binding [GO:0008198]; ferroxidase activity [GO:0004322]; oxidoreductase activity [GO:0016491]	basolateral plasma membrane [GO:0016323]; integral component of membrane [GO:0016021]; perinuclear region of cytoplasm [GO:0048471]; plasma membrane [GO:0005886]	GO:0004322; GO:0005507; GO:0005886; GO:0006825; GO:0006826; GO:0006879; GO:0008198; GO:0016021; GO:0016323; GO:0016491; GO:0048471; GO:0055072	R-MMU-425410;R-MMU-917937;	mmu:15203;	14.1736	14.2707	14.0401	13.827	14.3473	15.2827	14.7794	15.0524	14.5371	14.7928
Gphn_Q8BUV3	-0.860774	-0.915037	-0.844377	-0.681097	-1.33125	1.25545	0.881134	0.765645	1.00104	0.729262	Gphn	Gephyrin;Molybdopterin adenylyltransferase;Molybdopterin molybdenumtransferase	Q8BUV3	1.01581	0.000211891	0.00517096	-0.25075	sp|Q8BUV3|GEPH_MOUSE Gephyrin OS=Mus musculus OX=10090 GN=Gphn PE=1 SV=2	FUNCTION: Microtubule-associated protein involved in membrane protein-cytoskeleton interactions. It is thought to anchor the inhibitory glycine receptor (GLYR) to subsynaptic microtubules (By similarity). Acts as a major instructive molecule at inhibitory synapses, where it also clusters GABA type A receptors (PubMed:25025157). {ECO:0000250|UniProtKB:Q03555, ECO:0000269|PubMed:25025157}.; FUNCTIO…	SUBCELLULAR LOCATION: Cell junction, synapse, postsynaptic cell membrane {ECO:0000250|UniProtKB:Q03555}; Lipid-anchor {ECO:0000250|UniProtKB:Q03555}; Cytoplasmic side {ECO:0000250|UniProtKB:Q03555}. Cell membrane {ECO:0000250|UniProtKB:Q03555}; Lipid-anchor {ECO:0000250|UniProtKB:Q03555}; Cytoplasmic side {ECO:0000250|UniProtKB:Q03555}. Cytoplasm, cytosol {ECO:0000269|PubMed:25025157}. Cytoplasm,…		establishment of protein localization [GO:0045184]; establishment of synaptic specificity at neuromuscular junction [GO:0007529]; gamma-aminobutyric acid receptor clustering [GO:0097112]; glycine receptor clustering [GO:0072579]; maintenance of postsynaptic specialization structure [GO:0098880]; molybdenum incorporation into molybdenum-molybdopterin complex [GO:0018315]; molybdopterin cofactor bi…	ATP binding [GO:0005524]; cytoskeletal protein binding [GO:0008092]; identical protein binding [GO:0042802]; metal ion binding [GO:0046872]; molecular adaptor activity [GO:0060090]; molybdopterin adenylyltransferase activity [GO:0061598]; molybdopterin cofactor binding [GO:0043546]; molybdopterin molybdotransferase activity [GO:0061599]; nitrate reductase activity [GO:0008940]; signaling receptor…	anchored component of synaptic membrane [GO:0099144]; cytoplasm [GO:0005737]; cytoskeleton [GO:0005856]; cytosol [GO:0005829]; dendrite [GO:0030425]; extrinsic component of cytoplasmic side of plasma membrane [GO:0031234]; extrinsic component of plasma membrane [GO:0019897]; GABA-ergic synapse [GO:0098982]; glycinergic synapse [GO:0098690]; inhibitory synapse [GO:0060077]; neuronal cell body [GO:…	GO:0005102; GO:0005524; GO:0005737; GO:0005829; GO:0005856; GO:0006777; GO:0007529; GO:0008092; GO:0008940; GO:0010038; GO:0014069; GO:0018315; GO:0019897; GO:0030425; GO:0031234; GO:0032324; GO:0042802; GO:0043025; GO:0043546; GO:0045184; GO:0045202; GO:0045211; GO:0046872; GO:0060077; GO:0060090; GO:0061598; GO:0061599; GO:0072579; GO:0097060; GO:0097112; GO:0098690; GO:0098794; GO:0098879; GO:…	R-MMU-947581;	mmu:268566;	15.8678	15.8604	15.87	15.8921	15.8041	16.1541	16.1035	16.0879	16.1197	16.0829
N6amt2_Q9CY45	-1.23333	-0.997193	-1.28108	-0.886427	0.23234	1.17134	0.675019	0.268203	1.04022	1.01091	N6amt2	Protein-lysine N-methyltransferase N6amt2	Q9CY45	1.03658	0.000212104	0.00517096	-0.493339	sp|Q9CY45|EFMT1_MOUSE EEF1A lysine methyltransferase 1 OS=Mus musculus OX=10090 GN=Eef1akmt1 PE=1 SV=1	FUNCTION: Protein-lysine methyltransferase that selectively catalyzes the trimethylation of EEF1A at 'Lys-79'. {ECO:0000255|HAMAP-Rule:MF_03187}.	SUBCELLULAR LOCATION: Cytoplasm {ECO:0000255|HAMAP-Rule:MF_03187}.		peptidyl-lysine methylation [GO:0018022]	methyltransferase activity [GO:0008168]; nucleic acid binding [GO:0003676]; protein-lysine N-methyltransferase activity [GO:0016279]	cytoplasm [GO:0005737]	GO:0003676; GO:0005737; GO:0008168; GO:0016279; GO:0018022	R-MMU-8876725;	mmu:68043;	13.3667	13.4367	13.3526	13.4694	13.8007	14.0787	13.9317	13.8113	14.0399	14.0312
Optn_Q8K3K8	-0.809633	-0.480815	-0.87739	-1.32655	-0.686149	1.01063	0.974068	1.46144	-0.239968	0.974371	Optn	Optineurin	Q8K3K8	1.03038	0.000213286	0.00517429	-0.467756	sp|Q8K3K8|OPTN_MOUSE Optineurin OS=Mus musculus OX=10090 GN=Optn PE=1 SV=1	FUNCTION: Plays an important role in the maintenance of the Golgi complex, in membrane trafficking, in exocytosis, through its interaction with myosin VI and Rab8. Links myosin VI to the Golgi complex and plays an important role in Golgi ribbon formation. Plays a role in the activation of innate immune response during viral infection. Mechanistically, recruits TBK1 at the Golgi apparatus, promoti…	SUBCELLULAR LOCATION: Cytoplasm, perinuclear region {ECO:0000269|PubMed:15607428}. Golgi apparatus {ECO:0000250|UniProtKB:Q96CV9}. Golgi apparatus, trans-Golgi network {ECO:0000250}. Cytoplasmic vesicle, autophagosome {ECO:0000250}. Cytoplasmic vesicle {ECO:0000250}. Recycling endosome {ECO:0000250}. Note=Found in the perinuclear region and associates with the Golgi apparatus. Colocalizes with MY…		autophagy [GO:0006914]; cellular protein localization [GO:0034613]; cellular response to unfolded protein [GO:0034620]; cytokine secretion [GO:0050663]; defense response to Gram-negative bacterium [GO:0050829]; Golgi organization [GO:0007030]; Golgi ribbon formation [GO:0090161]; Golgi to plasma membrane protein transport [GO:0043001]; innate immune response [GO:0045087]; negative regulation of c…	identical protein binding [GO:0042802]; K63-linked polyubiquitin modification-dependent protein binding [GO:0070530]; metal ion binding [GO:0046872]; polyubiquitin modification-dependent protein binding [GO:0031593]; protein C-terminus binding [GO:0008022]; protein-macromolecule adaptor activity [GO:0030674]; Rab GTPase binding [GO:0017137]; TFIIIA-class transcription factor binding [GO:0001155];…	autophagosome [GO:0005776]; axon [GO:0030424]; cytoplasm [GO:0005737]; cytoplasmic vesicle [GO:0031410]; cytosol [GO:0005829]; Golgi apparatus [GO:0005794]; neuronal cell body [GO:0043025]; nucleus [GO:0005634]; perinuclear region of cytoplasm [GO:0048471]; recycling endosome [GO:0055037]; trans-Golgi network [GO:0005802]	GO:0001155; GO:0001819; GO:0001920; GO:0005634; GO:0005737; GO:0005776; GO:0005794; GO:0005802; GO:0005829; GO:0006914; GO:0007030; GO:0008022; GO:0008284; GO:0008285; GO:0010508; GO:0010628; GO:0017137; GO:0030424; GO:0030674; GO:0031410; GO:0031593; GO:0034067; GO:0034613; GO:0034620; GO:0042802; GO:0043001; GO:0043025; GO:0043122; GO:0043124; GO:0043130; GO:0043524; GO:0043525; GO:0045087; GO:…	R-MMU-2565942;R-MMU-8854214;	mmu:71648;	15.4042	15.4962	15.3853	15.2596	15.4388	15.9134	15.9032	16.0395	15.5636	15.9033
Pex19_Q8VCI5	-0.993536	-0.684908	-0.596565	-0.985585	-0.937843	1.20717	1.14686	1.08276	-0.36147	1.12312	Pex19	Peroxisomal biogenesis factor 19	Q8VCI5	1.02528	0.000220251	0.00531718	-0.437109	sp|Q8VCI5|PEX19_MOUSE Peroxisomal biogenesis factor 19 OS=Mus musculus OX=10090 GN=Pex19 PE=1 SV=1	FUNCTION: Necessary for early peroxisomal biogenesis. Acts both as a cytosolic chaperone and as an import receptor for peroxisomal membrane proteins (PMPs). Binds and stabilizes newly synthesized PMPs in the cytoplasm by interacting with their hydrophobic membrane-spanning domains, and targets them to the peroxisome membrane by binding to the integral membrane protein PEX3. Excludes CDKN2A from t…	SUBCELLULAR LOCATION: Cytoplasm {ECO:0000250|UniProtKB:P40855}. Peroxisome membrane {ECO:0000250|UniProtKB:P40855}; Lipid-anchor {ECO:0000250|UniProtKB:P40855}; Cytoplasmic side {ECO:0000250|UniProtKB:P40855}. Note=Mainly cytoplasmic, some fraction membrane-associated to the outer surface of peroxisomes. {ECO:0000250|UniProtKB:P40855}.		chaperone-mediated protein folding [GO:0061077]; chaperone-mediated protein transport [GO:0072321]; establishment of protein localization to peroxisome [GO:0072663]; negative regulation of lipid binding [GO:1900131]; peroxisome fission [GO:0016559]; peroxisome membrane biogenesis [GO:0016557]; peroxisome organization [GO:0007031]; protein import into peroxisome membrane [GO:0045046]; protein stab…	ATPase binding [GO:0051117]; peroxisome membrane class-1 targeting sequence binding [GO:0036105]; peroxisome membrane targeting sequence binding [GO:0033328]; protein N-terminus binding [GO:0047485]	brush border membrane [GO:0031526]; cytoplasm [GO:0005737]; cytosol [GO:0005829]; integral component of membrane [GO:0016021]; nucleoplasm [GO:0005654]; nucleus [GO:0005634]; peroxisomal membrane [GO:0005778]; peroxisome [GO:0005777]; protein-containing complex [GO:0032991]	GO:0005634; GO:0005654; GO:0005737; GO:0005777; GO:0005778; GO:0005829; GO:0006625; GO:0007031; GO:0016021; GO:0016557; GO:0016559; GO:0031526; GO:0032991; GO:0033328; GO:0036105; GO:0045046; GO:0047485; GO:0050821; GO:0051117; GO:0061077; GO:0072321; GO:0072663; GO:1900131	R-MMU-1369062;R-MMU-9603798;	mmu:19298;	17.2535	17.3338	17.3568	17.2556	17.268	17.8263	17.8106	17.7939	17.418	17.8044
Etfdh_Q921G7	-1.30007	-0.300506	-0.731405	-1.22585	-0.738609	0.783891	1.57227	1.08363	0.494021	0.362621	Etfdh	Electron transfer flavoprotein-ubiquinone oxidoreductase, mitochondrial	Q921G7	1.01915	0.000221326	0.00531719	-0.353714	sp|Q921G7|ETFD_MOUSE Electron transfer flavoprotein-ubiquinone oxidoreductase, mitochondrial OS=Mus musculus OX=10090 GN=Etfdh PE=1 SV=1	FUNCTION: Accepts electrons from ETF and reduces ubiquinone. {ECO:0000250}.	SUBCELLULAR LOCATION: Mitochondrion inner membrane {ECO:0000250}.		electron transport chain [GO:0022900]; fatty acid beta-oxidation using acyl-CoA dehydrogenase [GO:0033539]; respiratory electron transport chain [GO:0022904]; response to oxidative stress [GO:0006979]	4 iron, 4 sulfur cluster binding [GO:0051539]; electron transfer activity [GO:0009055]; electron-transferring-flavoprotein dehydrogenase activity [GO:0004174]; iron-sulfur cluster binding [GO:0051536]; metal ion binding [GO:0046872]; oxidoreductase activity [GO:0016491]; oxidoreductase activity, oxidizing metal ions with flavin as acceptor [GO:0043783]; quinone binding [GO:0048038]; ubiquinone bi…	integral component of mitochondrial inner membrane [GO:0031305]; membrane [GO:0016020]; mitochondrial electron transfer flavoprotein complex [GO:0017133]; mitochondrial inner membrane [GO:0005743]; mitochondrial membrane [GO:0031966]; mitochondrion [GO:0005739]	GO:0004174; GO:0005739; GO:0005743; GO:0006979; GO:0009055; GO:0016020; GO:0016491; GO:0017133; GO:0022900; GO:0022904; GO:0031305; GO:0031966; GO:0033539; GO:0043783; GO:0046872; GO:0048038; GO:0048039; GO:0051536; GO:0051539	R-MMU-611105;	mmu:66841;	18.378	18.5837	18.4951	18.3933	18.4936	18.8069	18.9692	18.8686	18.7473	18.7202
Cfi_Q61129	-0.711557	-1.58651	-0.571113	-0.877939	-0.46198	0.943532	0.842431	1.52502	0.0383407	0.859776	Cfi	Complement factor I;Complement factor I heavy chain;Complement factor I light chain	Q61129	1.0246	0.000222692	0.00532417	-0.422951	sp|Q61129|CFAI_MOUSE Complement factor I OS=Mus musculus OX=10090 GN=Cfi PE=1 SV=3	FUNCTION: Trypsin-like serine protease that plays an essential role in regulating the immune response by controlling all complement pathways. Inhibits these pathways by cleaving three peptide bonds in the alpha-chain of C3b and two bonds in the alpha-chain of C4b thereby inactivating these proteins. Essential cofactors for these reactions include factor H and C4BP in the fluid phase and membrane …	SUBCELLULAR LOCATION: Secreted, extracellular space {ECO:0000250|UniProtKB:P05156}.		complement activation [GO:0006956]; complement activation, classical pathway [GO:0006958]; innate immune response [GO:0045087]	metal ion binding [GO:0046872]; scavenger receptor activity [GO:0005044]; serine-type endopeptidase activity [GO:0004252]	extracellular space [GO:0005615]; membrane [GO:0016020]; nucleus [GO:0005634]	GO:0004252; GO:0005044; GO:0005615; GO:0005634; GO:0006956; GO:0006958; GO:0016020; GO:0045087; GO:0046872	R-MMU-977606;	mmu:12630;	17.2255	17.0057	17.2608	17.1837	17.2882	17.6413	17.6159	17.7874	17.4139	17.6203
Fn3krp_Q8K274	-0.675334	-0.73542	-1.44972	-0.877411	-0.381872	1.73305	0.763245	1.1198	0.154619	0.349041	Fn3krp	Ketosamine-3-kinase	Q8K274	1.03708	0.00022572	0.00533967	-0.577045	sp|Q8K274|KT3K_MOUSE Ketosamine-3-kinase OS=Mus musculus OX=10090 GN=Fn3krp PE=1 SV=2	FUNCTION: Ketosamine-3-kinase involved in protein deglycation by mediating phosphorylation of ribuloselysine and psicoselysine on glycated proteins, to generate ribuloselysine-3 phosphate and psicoselysine-3 phosphate, respectively (PubMed:14633848). Ribuloselysine-3 phosphate and psicoselysine-3 phosphate adducts are unstable and decompose under physiological conditions (PubMed:14633848). Not ab…				ATP binding [GO:0005524]; kinase activity [GO:0016301]; protein-ribulosamine 3-kinase activity [GO:0102193]		GO:0005524; GO:0016301; GO:0102193	R-MMU-163841;	mmu:238024;	15.6131	15.592	15.3419	15.5423	15.7158	16.4564	16.1168	16.2417	15.9037	15.9718
Adrm1_Q9JKV1	-0.933373	-1.03644	-1.45031	-0.351258	-0.335028	0.861082	1.37005	1.31506	-0.0445288	0.604739	Adrm1	Proteasomal ubiquitin receptor ADRM1	Q9JKV1	1.04188	0.000226667	0.00533967	-0.618822	sp|Q9JKV1|ADRM1_MOUSE Proteasomal ubiquitin receptor ADRM1 OS=Mus musculus OX=10090 GN=Adrm1 PE=1 SV=2	FUNCTION: Component of the 26S proteasome, a multiprotein complex involved in the ATP-dependent degradation of ubiquitinated proteins. This complex plays a key role in the maintenance of protein homeostasis by removing misfolded or damaged proteins, which could impair cellular functions, and by removing proteins whose functions are no longer required. Therefore, the proteasome participates in num…	SUBCELLULAR LOCATION: Cytoplasm {ECO:0000269|PubMed:15819879}. Nucleus {ECO:0000250|UniProtKB:Q16186}.		adipose tissue development [GO:0060612]; follicle-stimulating hormone signaling pathway [GO:0042699]; oogenesis [GO:0048477]; ovarian follicle development [GO:0001541]; positive regulation of growth hormone receptor signaling pathway [GO:0060399]; proteasome assembly [GO:0043248]; regulation of T cell differentiation in thymus [GO:0033081]; seminiferous tubule development [GO:0072520]; Sertoli ce…	endopeptidase activator activity [GO:0061133]; protease binding [GO:0002020]; proteasome binding [GO:0070628]; ubiquitin binding [GO:0043130]	cytosol [GO:0005829]; nucleoplasm [GO:0005654]; plasma membrane [GO:0005886]; proteasome complex [GO:0000502]; proteasome regulatory particle, lid subcomplex [GO:0008541]	GO:0000502; GO:0001541; GO:0002020; GO:0005654; GO:0005829; GO:0005886; GO:0006368; GO:0006511; GO:0007286; GO:0008541; GO:0033081; GO:0042699; GO:0043130; GO:0043248; GO:0048477; GO:0048538; GO:0060009; GO:0060399; GO:0060612; GO:0061133; GO:0070628; GO:0072520	R-MMU-5689603;R-MMU-5689880;	mmu:56436;	14.7324	14.6936	14.5376	14.9517	14.9578	15.4084	15.6002	15.5795	15.0672	15.3119
Lyz2_P08905	0.632184	0.869608	0.649813	1.38202	0.540605	-1.21724	-0.0694017	-1.40094	-0.0572843	-1.32937	Lyz2	Lysozyme C-2;Lysozyme C-1	P08905	1.04526	0.000228157	0.00533967	0.782093	sp|P08905|LYZ2_MOUSE Lysozyme C-2 OS=Mus musculus OX=10090 GN=Lyz2 PE=1 SV=2;sp|P17897|LYZ1_MOUSE Lysozyme C-1 OS=Mus musculus OX=10090 GN=Lyz1 PE=1 SV=1	FUNCTION: Lysozymes have primarily a bacteriolytic function; those in tissues and body fluids are associated with the monocyte-macrophage system and enhance the activity of immunoagents. Lyz2 is active against a range of Gram-positive and Gram-negative bacteria. More effective than Lyz1 in killing Gram-negative bacteria. Lyz1 and Lyz2 are equally effective in killing Gram-positive bacteria. {ECO:…	SUBCELLULAR LOCATION: Secreted.		cytolysis [GO:0019835]; defense response to bacterium [GO:0042742]; defense response to Gram-negative bacterium [GO:0050829]; defense response to Gram-positive bacterium [GO:0050830]; metabolic process [GO:0008152]	hydrolase activity, acting on glycosyl bonds [GO:0016798]; identical protein binding [GO:0042802]; lysozyme activity [GO:0003796]	cytoplasm [GO:0005737]; endoplasmic reticulum lumen [GO:0005788]; extracellular space [GO:0005615]; Golgi cis cisterna [GO:0000137]; Golgi stack [GO:0005795]; microvillus [GO:0005902]; rough endoplasmic reticulum lumen [GO:0048237]; secretory granule [GO:0030141]; trans-Golgi network transport vesicle [GO:0030140]	GO:0000137; GO:0003796; GO:0005615; GO:0005737; GO:0005788; GO:0005795; GO:0005902; GO:0008152; GO:0016798; GO:0019835; GO:0030140; GO:0030141; GO:0042742; GO:0042802; GO:0048237; GO:0050829; GO:0050830	R-MMU-6798695;R-MMU-6803157;	mmu:17105;	17.9763	18.0903	17.9848	18.3362	17.9324	17.0888	17.6396	17.0006	17.6454	17.035
Lpin1_Q91ZP3	-1.47546	-0.746354	-0.791697	-1.15195	-0.0420374	1.12548	1.0525	1.24451	0.193722	0.591301	Lpin1	Phosphatidate phosphatase LPIN1	Q91ZP3	1.02523	0.000228476	0.00533967	-0.42035	sp|Q91ZP3|LPIN1_MOUSE Phosphatidate phosphatase LPIN1 OS=Mus musculus OX=10090 GN=Lpin1 PE=1 SV=1	FUNCTION: Acts as a magnesium-dependent phosphatidate phosphatase enzyme which catalyzes the conversion of phosphatidic acid to diacylglycerol during triglyceride, phosphatidylcholine and phosphatidylethanolamine biosynthesis and therefore controls the metabolism of fatty acids at different levels (PubMed:17158099). Acts also as nuclear transcriptional coactivator for PPARGC1A/PPARA regulatory pa…	SUBCELLULAR LOCATION: [Isoform 1]: Mitochondrion outer membrane {ECO:0000269|PubMed:21397848}. Cytoplasm {ECO:0000269|PubMed:21397848}. Nucleus membrane {ECO:0000269|PubMed:21397848}. Note=Recruited at the mitochondrion outer membrane following phosphatidic acid formation mediated by PLD6. In neuronals cells, isoform 1 is exclusively cytoplasmic. In 3T3-L1 pre-adipocytes, it primarily located in …	DISEASE: Note=Defects in Lpin1 are the cause of the fatty liver dystrophy phenotype (fld). Fld mutant mices are characterized by neonatal fatty liver and hypertriglyceridemia that resolve at weaning, and neuropathy affecting peripheral nerve in adulthood. Adipose tissue deficiency, glucose intolerance and increased susceptibility to atherosclerosis are associated with this mutation too. Two indep…	actin cytoskeleton reorganization [GO:0031532]; cellular lipid metabolic process [GO:0044255]; cellular response to insulin stimulus [GO:0032869]; fat cell differentiation [GO:0045444]; fatty acid catabolic process [GO:0009062]; immune response [GO:0006955]; lipid metabolic process [GO:0006629]; mitochondrial fission [GO:0000266]; negative regulation of transcription by RNA polymerase II [GO:0000…	histone deacetylase binding [GO:0042826]; peroxisome proliferator activated receptor binding [GO:0042975]; phosphatidate phosphatase activity [GO:0008195]; RNA polymerase II transcription factor binding [GO:0001085]; transcription coactivator activity [GO:0003713]	cytoplasm [GO:0005737]; endoplasmic reticulum [GO:0005783]; endoplasmic reticulum membrane [GO:0005789]; mitochondrial outer membrane [GO:0005741]; nuclear membrane [GO:0031965]; nucleus [GO:0005634]; transcription regulator complex [GO:0005667]	GO:0000122; GO:0000266; GO:0001085; GO:0003713; GO:0005634; GO:0005667; GO:0005737; GO:0005741; GO:0005783; GO:0005789; GO:0006629; GO:0006642; GO:0006955; GO:0008195; GO:0009062; GO:0019432; GO:0031065; GO:0031529; GO:0031532; GO:0031965; GO:0032869; GO:0042826; GO:0042975; GO:0044255; GO:0045444; GO:0045598; GO:0045944; GO:0046473; GO:0120162	R-MMU-1483191;R-MMU-1483213;R-MMU-4419969;R-MMU-75109;	mmu:14245;	16.5003	16.6824	16.6711	16.5811	16.8584	17.15	17.1317	17.1797	16.9172	17.0165
Ttr_P07309	-1.40871	-1.63147	-0.305674	-0.0999434	-0.677258	0.434381	0.592392	0.933021	0.937228	1.22604	Ttr	Transthyretin	P07309	1.03142	0.000228735	0.00533967	-0.562206	sp|P07309|TTHY_MOUSE Transthyretin OS=Mus musculus OX=10090 GN=Ttr PE=1 SV=1	FUNCTION: Thyroid hormone-binding protein. Probably transports thyroxine from the bloodstream to the brain.	SUBCELLULAR LOCATION: Secreted.		purine nucleobase metabolic process [GO:0006144]; retinol metabolic process [GO:0042572]; thyroid hormone transport [GO:0070327]	hormone activity [GO:0005179]; hormone binding [GO:0042562]; identical protein binding [GO:0042802]; protein-containing complex binding [GO:0044877]; thyroid hormone binding [GO:0070324]	extracellular space [GO:0005615]; protein-containing complex [GO:0032991]	GO:0005179; GO:0005615; GO:0006144; GO:0032991; GO:0042562; GO:0042572; GO:0042802; GO:0044877; GO:0070324; GO:0070327	R-MMU-2453902;R-MMU-3000171;R-MMU-6798695;R-MMU-975634;	mmu:22139;	17.692	17.6161	18.068	18.1382	17.9414	18.3203	18.3742	18.4903	18.4917	18.5902
F2_P19221	-0.703386	-1.45312	-1.15662	-0.496716	-0.395316	1.138	0.801357	1.57281	0.315986	0.377003	F2	Prothrombin;Activation peptide fragment 1;Activation peptide fragment 2;Thrombin light chain;Thrombin heavy chain	P19221	1.02375	0.000231393	0.00537636	-0.420732	sp|P19221|THRB_MOUSE Prothrombin OS=Mus musculus OX=10090 GN=F2 PE=1 SV=1	FUNCTION: Thrombin, which cleaves bonds after Arg and Lys, converts fibrinogen to fibrin and activates factors V, VII, VIII, XIII, and, in complex with thrombomodulin, protein C. Functions in blood homeostasis, inflammation and wound healing (By similarity). {ECO:0000250}.			acute-phase response [GO:0006953]; antimicrobial humoral immune response mediated by antimicrobial peptide [GO:0061844]; blood coagulation [GO:0007596]; cell surface receptor signaling pathway [GO:0007166]; cytolysis by host of symbiont cells [GO:0051838]; fibrinolysis [GO:0042730]; negative regulation of astrocyte differentiation [GO:0048712]; negative regulation of cytokine production involved …	calcium ion binding [GO:0005509]; enzyme activator activity [GO:0008047]; heparin binding [GO:0008201]; lipopolysaccharide binding [GO:0001530]; peptidase activity [GO:0008233]; serine-type endopeptidase activity [GO:0004252]; signaling receptor binding [GO:0005102]; thrombospondin receptor activity [GO:0070053]	collagen-containing extracellular matrix [GO:0062023]; external side of plasma membrane [GO:0009897]; extracellular space [GO:0005615]	GO:0001530; GO:0001934; GO:0004252; GO:0005102; GO:0005509; GO:0005615; GO:0006953; GO:0007166; GO:0007596; GO:0008047; GO:0008201; GO:0008233; GO:0008284; GO:0008360; GO:0009611; GO:0009897; GO:0010468; GO:0014068; GO:0030168; GO:0030194; GO:0030307; GO:0032967; GO:0042730; GO:0045861; GO:0048712; GO:0051281; GO:0051480; GO:0051838; GO:0061844; GO:0062023; GO:0070053; GO:0070493; GO:0070945; GO:…	R-MMU-140837;R-MMU-140875;R-MMU-159740;R-MMU-159763;R-MMU-159782;R-MMU-202733;R-MMU-375276;R-MMU-416476;R-MMU-456926;R-MMU-76009;R-MMU-977606;	mmu:14061;	17.753	17.5655	17.6397	17.8047	17.8301	18.2136	18.1294	18.3224	18.008	18.0233
Sec22b_O08547	-1.29088	-0.718183	-0.963937	-1.22233	-0.253467	1.35482	0.843399	0.929463	0.8137	0.507419	Sec22b	Vesicle-trafficking protein SEC22b	O08547	1.01688	0.00023432	0.0053885	-0.286869	sp|O08547|SC22B_MOUSE Vesicle-trafficking protein SEC22b OS=Mus musculus OX=10090 GN=Sec22b PE=1 SV=3	FUNCTION: SNARE involved in targeting and fusion of ER-derived transport vesicles with the Golgi complex as well as Golgi-derived retrograde transport vesicles with the ER.	SUBCELLULAR LOCATION: Endoplasmic reticulum membrane {ECO:0000250|UniProtKB:Q4KM74}; Single-pass type IV membrane protein {ECO:0000250|UniProtKB:Q4KM74}. Endoplasmic reticulum-Golgi intermediate compartment membrane {ECO:0000250|UniProtKB:Q4KM74}. Golgi apparatus, cis-Golgi network membrane {ECO:0000250|UniProtKB:Q4KM74}. Golgi apparatus, trans-Golgi network membrane {ECO:0000250|UniProtKB:Q4KM74…		endoplasmic reticulum to Golgi vesicle-mediated transport [GO:0006888]; negative regulation of autophagosome assembly [GO:1902902]; positive regulation of protein catabolic process [GO:0045732]; protein transport [GO:0015031]; retrograde vesicle-mediated transport, Golgi to endoplasmic reticulum [GO:0006890]; vesicle fusion with Golgi apparatus [GO:0048280]; vesicle-mediated transport [GO:0016192]	SNAP receptor activity [GO:0005484]; syntaxin binding [GO:0019905]	COPI-coated vesicle [GO:0030137]; endoplasmic reticulum [GO:0005783]; endoplasmic reticulum-Golgi intermediate compartment [GO:0005793]; endoplasmic reticulum-Golgi intermediate compartment membrane [GO:0033116]; endoplasmic reticulum membrane [GO:0005789]; ER to Golgi transport vesicle membrane [GO:0012507]; Golgi membrane [GO:0000139]; integral component of membrane [GO:0016021]; melanosome [GO…	GO:0000139; GO:0005484; GO:0005783; GO:0005789; GO:0005793; GO:0006888; GO:0006890; GO:0008021; GO:0012507; GO:0015031; GO:0016021; GO:0016192; GO:0019905; GO:0030137; GO:0031201; GO:0033116; GO:0042470; GO:0045732; GO:0048280; GO:1902902	R-MMU-1236974;R-MMU-204005;R-MMU-5694530;R-MMU-6811434;	mmu:20333;	16.925	17.0173	16.9777	16.936	17.0922	17.3515	17.269	17.2829	17.2642	17.2149
C8b_Q8BH35	0.0817262	-1.00078	-0.692506	-1.14605	-1.3798	1.20722	1.02136	1.19733	0.587729	0.12377	C8b	Complement component C8 beta chain	Q8BH35	1.03146	0.00023476	0.0053885	-0.518664	sp|Q8BH35|CO8B_MOUSE Complement component C8 beta chain OS=Mus musculus OX=10090 GN=C8b PE=1 SV=1	FUNCTION: Constituent of the membrane attack complex (MAC) that plays a key role in the innate and adaptive immune response by forming pores in the plasma membrane of target cells. {ECO:0000250}.	SUBCELLULAR LOCATION: Secreted.		complement activation, alternative pathway [GO:0006957]; complement activation, classical pathway [GO:0006958]; cytolysis [GO:0019835]	protein-containing complex binding [GO:0044877]	extracellular region [GO:0005576]; extracellular space [GO:0005615]; membrane attack complex [GO:0005579]	GO:0005576; GO:0005579; GO:0005615; GO:0006957; GO:0006958; GO:0019835; GO:0044877	R-MMU-166665;R-MMU-977606;	mmu:110382;	16.7725	16.4332	16.5298	16.3877	16.3144	17.1252	17.0669	17.1221	16.931	16.7856
Kras_P32883	-0.651061	-0.978076	-1.05986	-1.4908	-0.0994883	0.895072	0.614808	1.31856	0.342298	1.10855	Kras	GTPase KRas;GTPase KRas, N-terminally processed	P32883	1.0256	0.000235182	0.0053885	-0.358036	sp|P32883|RASK_MOUSE GTPase KRas OS=Mus musculus OX=10090 GN=Kras PE=1 SV=1	FUNCTION: Ras proteins bind GDP/GTP and possess intrinsic GTPase activity (By similarity). Plays an important role in the regulation of cell proliferation (PubMed:6474169, PubMed:1352876). Plays a role in promoting oncogenic events by inducing transcriptional silencing of tumor suppressor genes (TSGs) in colorectal cancer (CRC) cells in a ZNF304-dependent manner (By similarity). {ECO:0000250|UniP…	SUBCELLULAR LOCATION: Cell membrane {ECO:0000250|UniProtKB:P01116}; Lipid-anchor {ECO:0000250|UniProtKB:P01116}; Cytoplasmic side {ECO:0000250|UniProtKB:P01116}. Cytoplasm {ECO:0000250|UniProtKB:P01116}.; SUBCELLULAR LOCATION: [Isoform 2B]: Cell membrane {ECO:0000250|UniProtKB:P01116}; Lipid-anchor {ECO:0000250|UniProtKB:P01116}.		actin cytoskeleton organization [GO:0030036]; cytokine-mediated signaling pathway [GO:0019221]; endocrine signaling [GO:0038002]; epithelial tube branching involved in lung morphogenesis [GO:0060441]; female pregnancy [GO:0007565]; forebrain astrocyte development [GO:0021897]; homeostasis of number of cells within a tissue [GO:0048873]; liver development [GO:0001889]; negative regulation of cell …	GDP binding [GO:0019003]; GMP binding [GO:0019002]; GTPase activity [GO:0003924]; GTP binding [GO:0005525]; identical protein binding [GO:0042802]; LRR domain binding [GO:0030275]; protein-containing complex binding [GO:0044877]	cytoplasm [GO:0005737]; extrinsic component of cytoplasmic side of plasma membrane [GO:0031234]; membrane [GO:0016020]; membrane raft [GO:0045121]; mitochondrion [GO:0005739]; plasma membrane [GO:0005886]	GO:0001889; GO:0001934; GO:0003924; GO:0005525; GO:0005737; GO:0005739; GO:0005886; GO:0007265; GO:0007565; GO:0008284; GO:0008542; GO:0010628; GO:0016020; GO:0019002; GO:0019003; GO:0019221; GO:0021897; GO:0030036; GO:0030275; GO:0031234; GO:0031647; GO:0032228; GO:0035022; GO:0035900; GO:0038002; GO:0042802; GO:0043406; GO:0043524; GO:0044877; GO:0045121; GO:0045596; GO:0048169; GO:0048873; GO:…	R-MMU-1169092;R-MMU-1250347;R-MMU-1433557;R-MMU-171007;R-MMU-179812;R-MMU-180336;R-MMU-186763;R-MMU-1963640;R-MMU-210993;R-MMU-2179392;R-MMU-2424491;R-MMU-2871796;R-MMU-375165;R-MMU-4086398;R-MMU-5218921;R-MMU-5621575;R-MMU-5654688;R-MMU-5654693;R-MMU-5654699;R-MMU-5654700;R-MMU-5654704;R-MMU-5654706;R-MMU-5654712;R-MMU-5654719;R-MMU-5658442;R-MMU-5673000;R-MMU-5673001;R-MMU-5674135;R-MMU-5675221…	mmu:16653;	14.0263	13.9579	13.9407	13.8506	14.1416	14.3497	14.291	14.4382	14.234	14.3943
Acadl_P51174	-0.449817	-0.847741	-0.680608	-1.46768	-0.946785	1.43653	1.13475	0.625867	0.829804	0.36568	Acadl	Long-chain specific acyl-CoA dehydrogenase, mitochondrial	P51174	1.0162	0.000237	0.00539377	-0.30412	sp|P51174|ACADL_MOUSE Long-chain specific acyl-CoA dehydrogenase, mitochondrial OS=Mus musculus OX=10090 GN=Acadl PE=1 SV=2	FUNCTION: Long-chain specific acyl-CoA dehydrogenase is one of the acyl-CoA dehydrogenases that catalyze the first step of mitochondrial fatty acid beta-oxidation, an aerobic process breaking down fatty acids into acetyl-CoA and allowing the production of energy from fats. The first step of fatty acid beta-oxidation consists in the removal of one hydrogen from C-2 and C-3 of the straight-chain fa…	SUBCELLULAR LOCATION: Mitochondrion matrix {ECO:0000250|UniProtKB:P15650}.		carnitine catabolic process [GO:0042413]; carnitine metabolic process, CoA-linked [GO:0019254]; cellular lipid catabolic process [GO:0044242]; fatty acid beta-oxidation using acyl-CoA dehydrogenase [GO:0033539]; fatty acid catabolic process [GO:0009062]; long-chain fatty acid catabolic process [GO:0042758]; negative regulation of fatty acid biosynthetic process [GO:0045717]; negative regulation o…	acyl-CoA dehydrogenase activity [GO:0003995]; fatty-acyl-CoA binding [GO:0000062]; flavin adenine dinucleotide binding [GO:0050660]; identical protein binding [GO:0042802]; long-chain-acyl-CoA dehydrogenase activity [GO:0004466]; palmitoyl-CoA oxidase activity [GO:0016401]	mitochondrial matrix [GO:0005759]; mitochondrial membrane [GO:0031966]; mitochondrion [GO:0005739]	GO:0000062; GO:0001659; GO:0003995; GO:0004466; GO:0005739; GO:0005759; GO:0009062; GO:0009409; GO:0016401; GO:0019254; GO:0031966; GO:0033539; GO:0042413; GO:0042758; GO:0042802; GO:0044242; GO:0045717; GO:0046322; GO:0050660; GO:0055114; GO:0090181; GO:0120162	R-MMU-77285;R-MMU-77310;	mmu:11363;	18.8515	18.7827	18.8116	18.6754	18.7655	19.178	19.1258	19.0377	19.073	18.9927
Epn2_Q8CHU3	-0.447758	-0.335505	-1.05981	-1.41645	-0.923276	0.552411	1.07595	1.44121	0.0343997	1.07883	Epn2	Epsin-2	Q8CHU3	1.03103	0.000238565	0.00539377	-0.441097	sp|Q8CHU3|EPN2_MOUSE Epsin-2 OS=Mus musculus OX=10090 GN=Epn2 PE=1 SV=1	FUNCTION: Plays a role in the formation of clathrin-coated invaginations and endocytosis. {ECO:0000250}.	SUBCELLULAR LOCATION: Cytoplasm {ECO:0000250}. Note=In punctate structures throughout the cell and particularly concentrated in the region of the Golgi complex. {ECO:0000250}.		embryonic organ development [GO:0048568]; endocytosis [GO:0006897]; in utero embryonic development [GO:0001701]; negative regulation of sprouting angiogenesis [GO:1903671]; negative regulation of vascular endothelial growth factor receptor signaling pathway [GO:0030948]; Notch signaling pathway [GO:0007219]; positive regulation of Notch signaling pathway [GO:0045747]; regulation of endocytosis [G…	clathrin binding [GO:0030276]; phospholipid binding [GO:0005543]	clathrin coat of endocytic vesicle [GO:0030128]; clathrin vesicle coat [GO:0030125]; endosome [GO:0005768]; intracellular membrane-bounded organelle [GO:0043231]; plasma membrane [GO:0005886]	GO:0001701; GO:0005543; GO:0005768; GO:0005886; GO:0006897; GO:0007219; GO:0030100; GO:0030125; GO:0030128; GO:0030276; GO:0030948; GO:0043231; GO:0045747; GO:0048568; GO:1903671	R-MMU-8856825;R-MMU-8856828;	mmu:13855;	14.3158	14.3454	14.1544	14.0604	14.1904	14.5795	14.7175	14.8138	14.4429	14.7183
Agpat3_Q9D517	-1.20973	-0.872399	-0.190042	-1.30713	-0.724167	1.45319	1.05657	0.915867	0.274385	0.60345	Agpat3	1-acyl-sn-glycerol-3-phosphate acyltransferase gamma	Q9D517	1.01998	0.00024054	0.00539377	-0.341827	sp|Q9D517|PLCC_MOUSE 1-acyl-sn-glycerol-3-phosphate acyltransferase gamma OS=Mus musculus OX=10090 GN=Agpat3 PE=1 SV=2	FUNCTION: Converts 1-acyl-sn-glycerol-3-phosphate (lysophosphatidic acid or LPA) into 1,2-diacyl-sn-glycerol-3-phosphate (phosphatidic acid or PA) by incorporating an acyl moiety at the sn-2 position of the glycerol backbone (PubMed:15367102). Acts on LPA containing saturated or unsaturated fatty acids C16:0-C20:4 at the sn-1 position using C18:1, C20:4 or C18:2-CoA as the acyl donor (By similari…	SUBCELLULAR LOCATION: Endoplasmic reticulum membrane {ECO:0000269|PubMed:19114731}; Multi-pass membrane protein {ECO:0000255}. Nucleus envelope {ECO:0000250|UniProtKB:Q9NRZ7}.		CDP-diacylglycerol biosynthetic process [GO:0016024]	1-acylglycerol-3-phosphate O-acyltransferase activity [GO:0003841]; lysophosphatidic acid acyltransferase activity [GO:0042171]; transferase activity, transferring acyl groups [GO:0016746]	endomembrane system [GO:0012505]; endoplasmic reticulum [GO:0005783]; endoplasmic reticulum membrane [GO:0005789]; integral component of membrane [GO:0016021]; nuclear envelope [GO:0005635]	GO:0003841; GO:0005635; GO:0005783; GO:0005789; GO:0012505; GO:0016021; GO:0016024; GO:0016746; GO:0042171	R-MMU-1483166;R-MMU-6811436;	mmu:28169;	17.0398	17.1068	17.2423	17.0205	17.1363	17.5686	17.4899	17.4619	17.3345	17.3999
Cep41_Q99NF3	-0.216744	-1.79925	-1.18059	0.083174	-0.940915	0.574569	0.818954	1.1012	0.775493	0.784108	Cep41	Centrosomal protein of 41 kDa	Q99NF3	1.08201	0.00024078	0.00539377	-0.896216	sp|Q99NF3|CEP41_MOUSE Centrosomal protein of 41 kDa OS=Mus musculus OX=10090 GN=Cep41 PE=1 SV=1	FUNCTION: Required during ciliogenesis for tubulin glutamylation in cilium. Probably acts by participating in the transport of TTLL6, a tubulin polyglutamylase, between the basal body and the cilium. {ECO:0000269|PubMed:22246503}.	SUBCELLULAR LOCATION: Cytoplasm, cytoskeleton, microtubule organizing center, centrosome {ECO:0000250}. Cell projection, cilium {ECO:0000269|PubMed:22246503}. Cytoplasm, cytoskeleton, cilium basal body {ECO:0000269|PubMed:22246503}. Note=Localizes mainly to the cilium basal body and in primary cilia.		cilium assembly [GO:0060271]; protein polyglutamylation [GO:0018095]; protein transport [GO:0015031]		centriole [GO:0005814]; centrosome [GO:0005813]; ciliary basal body [GO:0036064]; cilium [GO:0005929]; cytoplasm [GO:0005737]	GO:0005737; GO:0005813; GO:0005814; GO:0005929; GO:0015031; GO:0018095; GO:0036064; GO:0060271	R-MMU-2565942;R-MMU-380259;R-MMU-380270;R-MMU-380284;R-MMU-380320;R-MMU-5620912;R-MMU-8854518;	mmu:83922;	11.256	10.3815	10.7233	11.4217	10.8558	11.6933	11.8284	11.9843	11.8043	11.8091
Pitpnm1_O35954	-0.517345	-0.809884	-0.911344	-0.835273	-1.35782	1.25659	1.37038	0.884442	0.604892	0.31536	Pitpnm1	Membrane-associated phosphatidylinositol transfer protein 1	O35954	1.01868	0.000241607	0.00539377	-0.290221	sp|O35954|PITM1_MOUSE Membrane-associated phosphatidylinositol transfer protein 1 OS=Mus musculus OX=10090 GN=Pitpnm1 PE=1 SV=1	FUNCTION: Catalyzes the transfer of phosphatidylinositol (PI) between membranes (By similarity). Binds PI (PubMed:10400687). Also binds phosphatidylcholine (PC) and phosphatidic acid (PA) with the binding affinity order of PI > PA > PC (By similarity). Regulates RHOA activity, and plays a role in cytoskeleton remodeling (By similarity). Necessary for normal completion of cytokinesis (By similarit…	SUBCELLULAR LOCATION: Cytoplasm {ECO:0000250|UniProtKB:O00562}. Golgi apparatus, Golgi stack membrane {ECO:0000250|UniProtKB:O00562}; Peripheral membrane protein {ECO:0000250|UniProtKB:O00562}. Endoplasmic reticulum membrane {ECO:0000250|UniProtKB:O00562}; Peripheral membrane protein {ECO:0000250|UniProtKB:O00562}. Lipid droplet {ECO:0000250|UniProtKB:O00562}. Cleavage furrow {ECO:0000250|UniProt…		phospholipid transport [GO:0015914]; protein transport [GO:0015031]	calcium ion binding [GO:0005509]; phosphatidic acid binding [GO:0070300]; phosphatidylcholine binding [GO:0031210]; phosphatidylcholine transporter activity [GO:0008525]; phosphatidylinositol binding [GO:0035091]; phosphatidylinositol transfer activity [GO:0008526]; phospholipid binding [GO:0005543]; receptor tyrosine kinase binding [GO:0030971]	cell body [GO:0044297]; cleavage furrow [GO:0032154]; cytoplasm [GO:0005737]; cytoplasmic ribonucleoprotein granule [GO:0036464]; cytosol [GO:0005829]; endoplasmic reticulum membrane [GO:0005789]; Golgi cisterna membrane [GO:0032580]; lipid droplet [GO:0005811]; midbody [GO:0030496]	GO:0005509; GO:0005543; GO:0005737; GO:0005789; GO:0005811; GO:0005829; GO:0008525; GO:0008526; GO:0015031; GO:0015914; GO:0030496; GO:0030971; GO:0031210; GO:0032154; GO:0032580; GO:0035091; GO:0036464; GO:0044297; GO:0070300	R-MMU-1483226;	mmu:18739;	15.5973	15.5494	15.5328	15.5453	15.4597	15.8877	15.9064	15.8268	15.781	15.7336
Tpmt_O55060	-1.06481	-0.283877	-0.629226	-1.18843	-1.21662	1.17079	1.19189	1.09337	0.664402	0.262514	Tpmt	Thiopurine S-methyltransferase	O55060	1.02221	0.000241951	0.00539377	-0.306258	sp|O55060|TPMT_MOUSE Thiopurine S-methyltransferase OS=Mus musculus OX=10090 GN=Tpmt PE=1 SV=1	FUNCTION: Catalyzes the S-methylation of thiopurine drugs such as 6-mercaptopurine (also called mercaptopurine, 6-MP or its brand name Purinethol) using S-adenosyl-L-methionine as the methyl donor (PubMed:18484748). TPMT activity modulates the cytotoxic effects of thiopurine prodrugs. A natural substrate for this enzyme has yet to be identified. {ECO:0000269|PubMed:18484748, ECO:0000305}.	SUBCELLULAR LOCATION: Cytoplasm.		drug metabolic process [GO:0017144]; methylation [GO:0032259]	S-adenosyl-L-methionine binding [GO:1904047]; thiopurine S-methyltransferase activity [GO:0008119]	cytoplasm [GO:0005737]	GO:0005737; GO:0008119; GO:0017144; GO:0032259; GO:1904047	R-MMU-156581;	mmu:22017;	13.7533	13.8898	13.8294	13.7317	13.7268	14.1439	14.1476	14.1303	14.0554	13.9852
Tmtc3_Q8BRH0	-0.325291	-0.34263	-0.568391	-1.54005	-1.40185	1.39476	0.780422	1.05442	0.456591	0.492014	Tmtc3	Transmembrane and TPR repeat-containing protein 3	Q8BRH0	1.02803	0.000248247	0.00550929	-0.439037	sp|Q8BRH0|TMTC3_MOUSE Protein O-mannosyl-transferase TMTC3 OS=Mus musculus OX=10090 GN=Tmtc3 PE=1 SV=2	FUNCTION: Transfers mannosyl residues to the hydroxyl group of serine or threonine residues. The 4 members of the TMTC family are O-mannosyl-transferases dedicated primarily to the cadherin superfamily, each member seems to have a distinct role in decorating the cadherin domains with O-linked mannose glycans at specific regions. Also acts as O-mannosyl-transferase on other proteins such as PDIA3.…	SUBCELLULAR LOCATION: Membrane {ECO:0000305}; Multi-pass membrane protein {ECO:0000305}. Endoplasmic reticulum {ECO:0000250|UniProtKB:Q6ZXV5}.		bud outgrowth involved in lung branching [GO:0060447]; cell differentiation [GO:0030154]; lung alveolus development [GO:0048286]; lung development [GO:0030324]; muscle fiber development [GO:0048747]; positive regulation of proteasomal protein catabolic process [GO:1901800]; post-embryonic development [GO:0009791]; protein O-linked mannosylation [GO:0035269]; regulation of gene expression [GO:0010…	dolichyl-phosphate-mannose-protein mannosyltransferase activity [GO:0004169]; mannosyltransferase activity [GO:0000030]	endoplasmic reticulum [GO:0005783]; integral component of membrane [GO:0016021]	GO:0000030; GO:0004169; GO:0005783; GO:0009791; GO:0010468; GO:0016021; GO:0030154; GO:0030324; GO:0034976; GO:0035269; GO:0048286; GO:0048747; GO:0060447; GO:1901800		mmu:237500;	15.7976	15.793	15.7337	15.4784	15.5148	16.2494	16.088	16.16	16.003	16.0123
Atp5c1_Q91VR2	-1.06921	-0.346028	-0.135959	-1.40285	-1.31927	1.26674	0.931254	0.431778	0.797405	0.846135	Atp5c1	ATP synthase subunit gamma, mitochondrial	Q91VR2	1.01975	0.000249983	0.00552306	-0.355387	sp|Q91VR2|ATPG_MOUSE ATP synthase subunit gamma, mitochondrial OS=Mus musculus OX=10090 GN=Atp5f1c PE=1 SV=1	FUNCTION: Mitochondrial membrane ATP synthase (F(1)F(0) ATP synthase or Complex V) produces ATP from ADP in the presence of a proton gradient across the membrane which is generated by electron transport complexes of the respiratory chain. F-type ATPases consist of two structural domains, F(1) - containing the extramembraneous catalytic core, and F(0) - containing the membrane proton channel, link…	SUBCELLULAR LOCATION: Mitochondrion inner membrane {ECO:0000250|UniProtKB:P05631}; Peripheral membrane protein {ECO:0000250|UniProtKB:P05631}; Matrix side {ECO:0000250|UniProtKB:P05631}.		ATP biosynthetic process [GO:0006754]; ATP metabolic process [GO:0046034]; ATP synthesis coupled proton transport [GO:0015986]; mitochondrial ATP synthesis coupled proton transport [GO:0042776]	proton-transporting ATP synthase activity, rotational mechanism [GO:0046933]	mitochondrial inner membrane [GO:0005743]; mitochondrial proton-transporting ATP synthase complex [GO:0005753]; mitochondrial proton-transporting ATP synthase complex, catalytic sector F(1) [GO:0000275]; mitochondrion [GO:0005739]; myelin sheath [GO:0043209]; proton-transporting ATP synthase complex, catalytic core F(1) [GO:0045261]	GO:0000275; GO:0005739; GO:0005743; GO:0005753; GO:0006754; GO:0015986; GO:0042776; GO:0043209; GO:0045261; GO:0046034; GO:0046933	R-MMU-163210;R-MMU-8949613;	mmu:11949;	17.9523	18.1026	18.1463	17.8829	17.9003	18.4379	18.3682	18.2643	18.3404	18.3505
Csf1r_P09581	-0.851099	-0.602098	-0.667916	-1.2577	-1.11649	0.989016	1.39949	0.583357	1.07887	0.444569	Csf1r	Macrophage colony-stimulating factor 1 receptor	P09581	1.01618	0.000257461	0.005663	-0.270189	sp|P09581|CSF1R_MOUSE Macrophage colony-stimulating factor 1 receptor OS=Mus musculus OX=10090 GN=Csf1r PE=1 SV=3	FUNCTION: Tyrosine-protein kinase that acts as cell-surface receptor for CSF1 and IL34 and plays an essential role in the regulation of survival, proliferation and differentiation of hematopoietic precursor cells, especially mononuclear phagocytes, such as macrophages and monocytes. Promotes the release of proinflammatory chemokines in response to IL34 and CSF1, and thereby plays an important rol…	SUBCELLULAR LOCATION: Cell membrane {ECO:0000269|PubMed:17353186, ECO:0000269|PubMed:8007983}; Single-pass type I membrane protein {ECO:0000269|PubMed:17353186, ECO:0000269|PubMed:8007983}. Note=The autophosphorylated receptor is ubiquitinated and internalized, leading to its degradation.		axon guidance [GO:0007411]; cell-cell junction maintenance [GO:0045217]; cell population proliferation [GO:0008283]; cellular response to cytokine stimulus [GO:0071345]; cellular response to macrophage colony-stimulating factor stimulus [GO:0036006]; cytokine-mediated signaling pathway [GO:0019221]; forebrain neuron differentiation [GO:0021879]; hematopoietic progenitor cell differentiation [GO:0…	ATP binding [GO:0005524]; cytokine binding [GO:0019955]; macrophage colony-stimulating factor receptor activity [GO:0005011]; protein homodimerization activity [GO:0042803]; protein phosphatase binding [GO:0019903]; transmembrane receptor protein tyrosine kinase activity [GO:0004714]	cell surface [GO:0009986]; CSF1-CSF1R complex [GO:1990682]; integral component of plasma membrane [GO:0005887]; intracellular membrane-bounded organelle [GO:0043231]; membrane [GO:0016020]; nucleoplasm [GO:0005654]; plasma membrane [GO:0005886]; receptor complex [GO:0043235]	GO:0001934; GO:0002244; GO:0002931; GO:0004714; GO:0005011; GO:0005524; GO:0005654; GO:0005886; GO:0005887; GO:0006954; GO:0007169; GO:0007275; GO:0007411; GO:0008283; GO:0008284; GO:0008285; GO:0008360; GO:0009986; GO:0010759; GO:0016020; GO:0018108; GO:0019221; GO:0019903; GO:0019955; GO:0021772; GO:0021879; GO:0030097; GO:0030316; GO:0030335; GO:0031529; GO:0032722; GO:0033674; GO:0036006; GO:…	R-MMU-449836;	mmu:12978;	16.7013	16.7388	16.7289	16.6402	16.6615	16.9778	17.0395	16.9169	16.9913	16.896
Slc9a9_Q8BZ00	0.607586	0.628417	1.07801	1.27791	0.452287	-1.2582	-0.372399	-1.435	0.209407	-1.18801	Slc9a9	Sodium/hydrogen exchanger 9	Q8BZ00	1.07417	0.000260932	0.00571395	0.879916	sp|Q8BZ00|SL9A9_MOUSE Sodium/hydrogen exchanger 9 OS=Mus musculus OX=10090 GN=Slc9a9 PE=2 SV=1	FUNCTION: May act in electroneutral exchange of protons for Na(+) across membranes. Involved in the effusion of Golgi luminal H(+) in exchange for cytosolic cations. Involved in organelle ion homeostasis by contributing to the maintenance of the unique acidic pH values of the Golgi and post-Golgi compartments in the cell (By similarity). {ECO:0000250}.	SUBCELLULAR LOCATION: Late endosome membrane {ECO:0000250}; Multi-pass membrane protein {ECO:0000250}.		potassium ion transmembrane transport [GO:0071805]; regulation of intracellular pH [GO:0051453]; sodium ion import across plasma membrane [GO:0098719]	potassium:proton antiporter activity [GO:0015386]; sodium:proton antiporter activity [GO:0015385]	integral component of membrane [GO:0016021]; late endosome membrane [GO:0031902]; plasma membrane [GO:0005886]; recycling endosome [GO:0055037]	GO:0005886; GO:0015385; GO:0015386; GO:0016021; GO:0031902; GO:0051453; GO:0055037; GO:0071805; GO:0098719	R-MMU-425986;	mmu:331004;	12.6333	12.6446	12.8892	12.9979	12.5488	11.6184	12.1003	11.5223	12.4167	11.6566
Tmem65_Q4VAE3	-1.28894	-1.11292	-0.592067	-0.663319	-0.658481	1.69802	0.949065	0.782723	0.651339	0.234582	Tmem65	Transmembrane protein 65	Q4VAE3	1.02284	0.000262833	0.00573023	-0.327958	sp|Q4VAE3|TMM65_MOUSE Transmembrane protein 65 OS=Mus musculus OX=10090 GN=Tmem65 PE=1 SV=1	FUNCTION: May play an important role in cardiac development and function. May regulate cardiac conduction and the function of the gap junction protein GJA1. May contribute to the stability and proper localization of GJA1 to cardiac intercalated disk thereby regulating gap junction communication (PubMed:26403541). Regulates mitochondrial respiration and mitochondrial DNA copy number maintenance (B…	SUBCELLULAR LOCATION: Cell membrane {ECO:0000269|PubMed:26403541}; Multi-pass membrane protein {ECO:0000255}. Mitochondrion inner membrane {ECO:0000250|UniProtKB:Q6PI78}; Multi-pass membrane protein {ECO:0000255}. Note=Localizes at the intercalated disk in ventricular tissue and cardiomyocytes. {ECO:0000269|PubMed:26403541}.		cardiac ventricle development [GO:0003231]; regulation of cardiac conduction [GO:1903779]		integral component of membrane [GO:0016021]; intercalated disc [GO:0014704]; mitochondrial inner membrane [GO:0005743]; mitochondrion [GO:0005739]; plasma membrane [GO:0005886]	GO:0003231; GO:0005739; GO:0005743; GO:0005886; GO:0014704; GO:0016021; GO:1903779		mmu:74868;	14.277	14.3105	14.4094	14.3959	14.3968	14.8445	14.7022	14.6706	14.6457	14.5665
Guk1_Q64520	-0.58678	-0.823239	-0.363171	-1.60322	-0.82191	0.808202	0.447616	1.42802	0.227799	1.28668	Guk1	Guanylate kinase	Q64520	1.02918	0.000264775	0.00574725	-0.405739	sp|Q64520|KGUA_MOUSE Guanylate kinase OS=Mus musculus OX=10090 GN=Guk1 PE=1 SV=2	FUNCTION: Catalyzes the phosphorylation of GMP to GDP. Essential enzyme for recycling GMP and indirectly, cyclic GMP (cGMP) (PubMed:8663313). Involved in the cGMP metabolism in photoreceptors (By similarity). {ECO:0000250|UniProtKB:P46195, ECO:0000269|PubMed:8663313}.	SUBCELLULAR LOCATION: Photoreceptor inner segment {ECO:0000269|PubMed:29515371}. Cytoplasm, cytosol {ECO:0000269|PubMed:29515371}. Note=Colocalizes with RD3 in photoreceptor inner segments and to a lesser extent in the outer plexiform layer. {ECO:0000269|PubMed:29515371}.		ATP metabolic process [GO:0046034]; dATP metabolic process [GO:0046060]; dGDP biosynthetic process [GO:0006185]; dGMP metabolic process [GO:0046054]; GDP biosynthetic process [GO:0046711]; GDP-mannose metabolic process [GO:0019673]; glycoprotein transport [GO:0034436]; GMP metabolic process [GO:0046037]; nucleotide phosphorylation [GO:0046939]; purine nucleotide metabolic process [GO:0006163]; xe…	ATP binding [GO:0005524]; guanylate kinase activity [GO:0004385]	cytosol [GO:0005829]; photoreceptor inner segment [GO:0001917]	GO:0001917; GO:0004385; GO:0005524; GO:0005829; GO:0006163; GO:0006185; GO:0006805; GO:0019673; GO:0034436; GO:0046034; GO:0046037; GO:0046054; GO:0046060; GO:0046711; GO:0046939	R-MMU-499943;	mmu:14923;	13.9681	13.9109	14.0221	13.7225	13.9113	14.3051	14.218	14.4549	14.1649	14.4207
Nup188_Q6ZQH8	-0.216974	-1.38574	-0.849959	-1.19774	-0.581657	1.2569	0.318553	1.34612	0.959631	0.35087	Nup188	Nucleoporin NUP188 homolog	Q6ZQH8	1.02679	0.00027082	0.00576397	-0.374093	sp|Q6ZQH8|NU188_MOUSE Nucleoporin NUP188 homolog OS=Mus musculus OX=10090 GN=Nup188 PE=1 SV=2	FUNCTION: Component of the nuclear pore complex (NPC), a complex required for the trafficking across the nuclear envelope. Required for proper protein transport into the nucleus. {ECO:0000250|UniProtKB:Q5SRE5}.	SUBCELLULAR LOCATION: Nucleus, nuclear pore complex {ECO:0000250|UniProtKB:Q5SRE5}.		mRNA transport [GO:0051028]; protein import into nucleus [GO:0006606]; RNA export from nucleus [GO:0006405]	structural constituent of nuclear pore [GO:0017056]	nuclear pore inner ring [GO:0044611]	GO:0006405; GO:0006606; GO:0017056; GO:0044611; GO:0051028	R-MMU-159227;R-MMU-159230;R-MMU-159231;R-MMU-159236;R-MMU-170822;R-MMU-191859;R-MMU-3108214;R-MMU-3232142;R-MMU-3301854;R-MMU-3371453;R-MMU-4085377;R-MMU-4551638;R-MMU-4570464;R-MMU-4615885;R-MMU-5578749;R-MMU-9615933;	mmu:227699;	14.1018	13.8435	13.9619	13.885	14.0212	14.4275	14.2201	14.4472	14.3618	14.2273
Apoh_Q01339	-0.437136	-1.42103	-0.184113	-0.682001	-1.45615	1.03562	0.677847	1.43961	0.375813	0.651542	Apoh	Beta-2-glycoprotein 1	Q01339	1.02371	0.000271242	0.00576397	-0.420034	sp|Q01339|APOH_MOUSE Beta-2-glycoprotein 1 OS=Mus musculus OX=10090 GN=Apoh PE=1 SV=1	FUNCTION: Binds to various kinds of negatively charged substances such as heparin, phospholipids, and dextran sulfate. May prevent activation of the intrinsic blood coagulation cascade by binding to phospholipids on the surface of damaged cells.	SUBCELLULAR LOCATION: Secreted.		animal organ regeneration [GO:0031100]; blood coagulation [GO:0007596]; blood coagulation, intrinsic pathway [GO:0007597]; negative regulation of angiogenesis [GO:0016525]; negative regulation of blood coagulation [GO:0030195]; negative regulation of endothelial cell migration [GO:0010596]; negative regulation of endothelial cell proliferation [GO:0001937]; negative regulation of fibrinolysis [GO…	heparin binding [GO:0008201]; identical protein binding [GO:0042802]; lipid binding [GO:0008289]; lipoprotein lipase activator activity [GO:0060230]; phospholipid binding [GO:0005543]	cell surface [GO:0009986]; chylomicron [GO:0042627]; cytoplasm [GO:0005737]; extracellular space [GO:0005615]; high-density lipoprotein particle [GO:0034364]; plasma membrane [GO:0005886]; very-low-density lipoprotein particle [GO:0034361]	GO:0001937; GO:0005543; GO:0005615; GO:0005737; GO:0005886; GO:0006641; GO:0007596; GO:0007597; GO:0008201; GO:0008289; GO:0009986; GO:0010596; GO:0010898; GO:0016525; GO:0030193; GO:0030195; GO:0031100; GO:0031639; GO:0033033; GO:0034197; GO:0034361; GO:0034364; GO:0034392; GO:0042627; GO:0042802; GO:0051006; GO:0051917; GO:0051918; GO:0060230; GO:0060268	R-MMU-114608;	mmu:11818;	17.8154	17.5682	17.8789	17.7539	17.5594	18.1853	18.0955	18.2868	18.0196	18.0889
Dlat_Q8BMF4	-1.00134	-0.464739	-0.451287	-1.28535	-1.04604	0.868392	1.39401	1.37837	0.460893	0.147096	Dlat	Dihydrolipoyllysine-residue acetyltransferase component of pyruvate dehydrogenase complex, mitochondrial	Q8BMF4	1.0211	0.000271297	0.00576397	-0.362205	sp|Q8BMF4|ODP2_MOUSE Dihydrolipoyllysine-residue acetyltransferase component of pyruvate dehydrogenase complex, mitochondrial OS=Mus musculus OX=10090 GN=Dlat PE=1 SV=2	FUNCTION: The pyruvate dehydrogenase complex catalyzes the overall conversion of pyruvate to acetyl-CoA and CO(2), and thereby links the glycolytic pathway to the tricarboxylic cycle. {ECO:0000250}.	SUBCELLULAR LOCATION: Mitochondrion matrix.		acetyl-CoA biosynthetic process from pyruvate [GO:0006086]; glucose metabolic process [GO:0006006]; mitochondrial acetyl-CoA biosynthetic process from pyruvate [GO:0061732]; sleep [GO:0030431]; tricarboxylic acid cycle [GO:0006099]	dihydrolipoyllysine-residue acetyltransferase activity [GO:0004742]; identical protein binding [GO:0042802]; pyruvate dehydrogenase (NAD+) activity [GO:0034604]	mitochondrial pyruvate dehydrogenase complex [GO:0005967]; mitochondrion [GO:0005739]; myelin sheath [GO:0043209]; pyruvate dehydrogenase complex [GO:0045254]	GO:0004742; GO:0005739; GO:0005967; GO:0006006; GO:0006086; GO:0006099; GO:0030431; GO:0034604; GO:0042802; GO:0043209; GO:0045254; GO:0061732	R-MMU-204174;R-MMU-389661;R-MMU-5362517;R-MMU-70268;	mmu:235339;	17.1337	17.2481	17.251	17.0732	17.1242	17.5322	17.6443	17.6409	17.4454	17.3785
Ipo11_Q8K2V6	-0.643761	-0.546994	-0.728719	-1.12376	-1.11986	1.20194	0.453536	1.73257	0.00942198	0.765627	Ipo11	Importin-11	Q8K2V6	1.02792	0.000271862	0.00576397	-0.439885	sp|Q8K2V6|IPO11_MOUSE Importin-11 OS=Mus musculus OX=10090 GN=Ipo11 PE=1 SV=1	FUNCTION: Functions in nuclear protein import as nuclear transport receptor. Serves as receptor for nuclear localization signals (NLS) in cargo substrates. Is thought to mediate docking of the importin/substrate complex to the nuclear pore complex (NPC) through binding to nucleoporin and the complex is subsequently translocated through the pore by an energy requiring, Ran-dependent mechanism. At …	SUBCELLULAR LOCATION: Cytoplasm {ECO:0000250}. Nucleus {ECO:0000250}.		protein import into nucleus [GO:0006606]; ribosomal protein import into nucleus [GO:0006610]	nuclear import signal receptor activity [GO:0061608]; Ran GTPase binding [GO:0008536]	cytosol [GO:0005829]; nuclear envelope [GO:0005635]; nucleoplasm [GO:0005654]	GO:0005635; GO:0005654; GO:0005829; GO:0006606; GO:0006610; GO:0008536; GO:0061608		mmu:76582;	15.8047	15.8302	15.7822	15.6779	15.6789	16.2922	16.0945	16.4324	15.9772	16.177
Pus10_Q9D3U0	-0.808097	-1.06451	-0.479195	-0.942174	-1.09651	1.21842	0.640624	1.47667	0.165181	0.889588	Pus10	Putative tRNA pseudouridine synthase Pus10	Q9D3U0	1.02003	0.000272207	0.00576397	-0.29614	sp|Q9D3U0|PUS10_MOUSE Putative tRNA pseudouridine synthase Pus10 OS=Mus musculus OX=10090 GN=Pus10 PE=1 SV=1	FUNCTION: Protein with different functions depending on its subcellular location: involved in miRNA processing in the nucleus and acts as a tRNA pseudouridylate synthase in the cytoplasm. In the cytoplasm, acts as a pseudouridylate synthase by catalyzing synthesis of pseudouridine(54) and pseudouridine(55) from uracil-54 and uracil-55, respectively, in the psi GC loop of a subset of tRNAs. tRNA p…	SUBCELLULAR LOCATION: Nucleus {ECO:0000250|UniProtKB:Q3MIT2}. Cytoplasm {ECO:0000250|UniProtKB:Q3MIT2}. Mitochondrion {ECO:0000250|UniProtKB:Q3MIT2}. Note=Localizes mainly in the nucleus. tRNA pseudouridylate synthase activity is restricted to the cytoplasm. Translocates from nucleus to mitochondria during TRAIL-induced apoptosis. {ECO:0000250|UniProtKB:Q3MIT2}.		primary miRNA processing [GO:0031053]; tRNA pseudouridine synthesis [GO:0031119]	metal ion binding [GO:0046872]; primary miRNA binding [GO:0070878]; pseudouridine synthase activity [GO:0009982]; tRNA pseudouridine synthase activity [GO:0106029]	cytoplasm [GO:0005737]; mitochondrion [GO:0005739]; nucleus [GO:0005634]	GO:0005634; GO:0005737; GO:0005739; GO:0009982; GO:0031053; GO:0031119; GO:0046872; GO:0070878; GO:0106029		mmu:74467;	14.7933	14.7501	14.8488	14.7707	14.7447	15.135	15.0376	15.1786	14.9574	15.0796
Fat3_Q8BNA6	-0.744197	-1.16517	-1.43327	-0.329131	-0.348069	0.519502	1.49743	0.595178	0.0155536	1.39218	Fat3	Protocadherin Fat 3	Q8BNA6	1.09434	0.000272534	0.00576397	-1.1939	sp|Q8BNA6|FAT3_MOUSE Protocadherin Fat 3 OS=Mus musculus OX=10090 GN=Fat3 PE=1 SV=2	FUNCTION: May play a role in the interactions between neurites derived from specific subsets of neurons during development.	SUBCELLULAR LOCATION: Membrane {ECO:0000305}; Single-pass type I membrane protein {ECO:0000305}.		cell-cell adhesion [GO:0098609]; cell morphogenesis involved in differentiation [GO:0000904]; homophilic cell adhesion via plasma membrane adhesion molecules [GO:0007156]; negative regulation of dendrite development [GO:2000171]; neuron migration [GO:0001764]; retina layer formation [GO:0010842]	calcium ion binding [GO:0005509]	dendrite [GO:0030425]; integral component of membrane [GO:0016021]; plasma membrane [GO:0005886]	GO:0000904; GO:0001764; GO:0005509; GO:0005886; GO:0007156; GO:0010842; GO:0016021; GO:0030425; GO:0098609; GO:2000171			12.7	12.3874	12.1883	13.0081	12.9941	13.6383	14.3644	13.6944	13.2641	14.2862
Npr3_P70180	-1.71745	-0.269875	-0.844095	-1.12936	-0.0934195	1.1641	0.609007	1.21737	0.210053	0.853655	Npr3	Atrial natriuretic peptide receptor 3	P70180	1.04182	0.000274275	0.00577611	-0.735366	sp|P70180|ANPRC_MOUSE Atrial natriuretic peptide receptor 3 OS=Mus musculus OX=10090 GN=Npr3 PE=1 SV=3	FUNCTION: Receptor for the natriuretic peptide hormones, binding with similar affinities atrial natriuretic peptide NPPA/ANP, brain natriuretic peptide NPPB/BNP, and C-type natriuretic peptide NPPC/CNP (PubMed:10377427, PubMed:17951249). May function as a clearance receptor for NPPA, NPPB and NPPC, regulating their local concentrations and effects (PubMed:10377427, PubMed:17951249). May regulate …	SUBCELLULAR LOCATION: Membrane; Single-pass type I membrane protein.	DISEASE: Note=Defects in Npr3 are the cause of a number of skeletal-overgrowth phenotypes, Longjohn (Lgj), Longjohn-2J (Lgj-2J) and Strigosus (Stri). These are all recessive conditions characterized by an elongated body, thoracic kyphosis, arachnodactyly, and sacral and/or tail kinks, but no significant changes in craniofacial structures (PubMed:10468599). {ECO:0000269|PubMed:10468599}.	adenylate cyclase-inhibiting G protein-coupled receptor signaling pathway [GO:0007193]; negative regulation of adenylate cyclase activity [GO:0007194]; negative regulation of cold-induced thermogenesis [GO:0120163]; negative regulation of smooth muscle cell proliferation [GO:0048662]; osteoclast proliferation [GO:0002158]; pancreatic juice secretion [GO:0030157]; phosphatidylinositol-mediated sig…	chloride ion binding [GO:0031404]; G protein-coupled peptide receptor activity [GO:0008528]; hormone binding [GO:0042562]; identical protein binding [GO:0042802]; natriuretic peptide receptor activity [GO:0016941]; peptide binding [GO:0042277]; peptide hormone binding [GO:0017046]; protein homodimerization activity [GO:0042803]	integral component of membrane [GO:0016021]; membrane [GO:0016020]; protein-containing complex [GO:0032991]	GO:0001501; GO:0002158; GO:0007193; GO:0007194; GO:0007200; GO:0008217; GO:0008528; GO:0016020; GO:0016021; GO:0016941; GO:0017046; GO:0030157; GO:0031404; GO:0032991; GO:0033688; GO:0035810; GO:0042277; GO:0042562; GO:0042802; GO:0042803; GO:0048015; GO:0048662; GO:0051000; GO:0120163		mmu:18162;	17.1721	17.8285	17.5681	17.4387	17.9085	18.4787	18.227	18.5029	18.0461	18.3379
Cisd1_Q91WS0	-0.62407	-0.363173	-0.868123	-1.52358	-0.886144	1.38172	1.18618	1.02541	0.448082	0.223709	Cisd1	CDGSH iron-sulfur domain-containing protein 1	Q91WS0	1.02154	0.000276541	0.00579915	-0.349928	sp|Q91WS0|CISD1_MOUSE CDGSH iron-sulfur domain-containing protein 1 OS=Mus musculus OX=10090 GN=Cisd1 PE=1 SV=1	FUNCTION: Plays a key role in regulating maximal capacity for electron transport and oxidative phosphorylation. May be involved in Fe-S cluster shuttling and/or in redox reactions (By similarity). {ECO:0000250, ECO:0000269|PubMed:17376863}.	SUBCELLULAR LOCATION: Mitochondrion outer membrane {ECO:0000269|PubMed:17376863}; Single-pass type III membrane protein {ECO:0000269|PubMed:17376863}.		regulation of cellular respiration [GO:0043457]	2 iron, 2 sulfur cluster binding [GO:0051537]; identical protein binding [GO:0042802]; iron ion binding [GO:0005506]	cytoplasmic side of mitochondrial outer membrane [GO:0032473]; integral component of membrane [GO:0016021]; mitochondrial outer membrane [GO:0005741]; mitochondrion [GO:0005739]	GO:0005506; GO:0005739; GO:0005741; GO:0016021; GO:0032473; GO:0042802; GO:0043457; GO:0051537		mmu:52637;	16.2897	16.3432	16.2396	16.1052	16.2359	16.7011	16.661	16.628	16.5096	16.4636
Abhd6_Q8R2Y0	-0.042842	-1.00048	-0.630163	-0.84721	-1.58924	0.945703	0.134522	0.704015	1.51222	0.813471	Abhd6	Monoacylglycerol lipase ABHD6	Q8R2Y0	1.03284	0.000281119	0.00582724	-0.518416	sp|Q8R2Y0|ABHD6_MOUSE Monoacylglycerol lipase ABHD6 OS=Mus musculus OX=10090 GN=Abhd6 PE=1 SV=1	FUNCTION: Lipase that preferentially hydrolysis medium-chain saturated monoacylglycerols including 2-arachidonoylglycerol (PubMed:18096503, PubMed:20657592). Through 2-arachidonoylglycerol degradation may regulate endocannabinoid signaling pathways (PubMed:18096503, PubMed:20657592). Also has a lysophosphatidyl lipase activity with a preference for lysophosphatidylglycerol among other lysophospho…	SUBCELLULAR LOCATION: Late endosome membrane {ECO:0000269|PubMed:26491015}; Single-pass type II membrane protein {ECO:0000255}. Lysosome membrane {ECO:0000269|PubMed:26491015}; Single-pass type II membrane protein {ECO:0000255}. Mitochondrion membrane {ECO:0000269|PubMed:20657592}; Single-pass type II membrane protein {ECO:0000255}.		acylglycerol catabolic process [GO:0046464]; long-term synaptic depression [GO:0060292]; lysobisphosphatidic acid metabolic process [GO:2001311]; monoacylglycerol catabolic process [GO:0052651]; negative regulation of cell migration [GO:0030336]; negative regulation of cold-induced thermogenesis [GO:0120163]; phospholipid catabolic process [GO:0009395]; positive regulation of lipid biosynthetic p…	acylglycerol lipase activity [GO:0047372]; phospholipase activity [GO:0004620]	AMPA glutamate receptor complex [GO:0032281]; GABA-ergic synapse [GO:0098982]; glutamatergic synapse [GO:0098978]; integral component of membrane [GO:0016021]; integral component of postsynaptic membrane [GO:0099055]; late endosome membrane [GO:0031902]; lysosomal membrane [GO:0005765]; mitochondrial membrane [GO:0031966]; mitochondrion [GO:0005739]	GO:0004620; GO:0005739; GO:0005765; GO:0009395; GO:0016021; GO:0030336; GO:0031902; GO:0031966; GO:0032281; GO:0046464; GO:0046889; GO:0047372; GO:0052651; GO:0060292; GO:0098978; GO:0098982; GO:0099055; GO:0099178; GO:0120163; GO:2000124; GO:2001311	R-MMU-426048;	mmu:66082;	16.031	15.729	15.8458	15.7773	15.5434	16.3427	16.0869	16.2665	16.5214	16.301
Clu_Q06890	-0.18794	-1.03211	-0.902576	-0.488156	-1.58303	1.10002	1.11573	1.23572	0.574963	0.167377	Clu	Clusterin;Clusterin beta chain;Clusterin alpha chain	Q06890	1.02295	0.000282036	0.00582724	-0.400171	sp|Q06890|CLUS_MOUSE Clusterin OS=Mus musculus OX=10090 GN=Clu PE=1 SV=1	FUNCTION: Functions as extracellular chaperone that prevents aggregation of non native proteins. Prevents stress-induced aggregation of blood plasma proteins (By similarity). Inhibits formation of amyloid fibrils by APP, APOC2, B2M, CALCA, CSN3, SNCA and aggregation-prone LYZ variants (in vitro) (PubMed:14741101). Does not require ATP. Maintains partially unfolded proteins in a state appropriate …	SUBCELLULAR LOCATION: Secreted {ECO:0000269|PubMed:12551933}. Nucleus {ECO:0000269|PubMed:12551933}. Cytoplasm {ECO:0000269|PubMed:12551933}. Mitochondrion membrane {ECO:0000250|UniProtKB:P10909}; Peripheral membrane protein {ECO:0000250|UniProtKB:P10909}; Cytoplasmic side {ECO:0000250|UniProtKB:P10909}. Cytoplasm, cytosol {ECO:0000269|PubMed:12551933}. Microsome {ECO:0000250|UniProtKB:P10909}. E…		cell morphogenesis [GO:0000902]; central nervous system myelin maintenance [GO:0032286]; chaperone-mediated protein complex assembly [GO:0051131]; chaperone-mediated protein folding [GO:0061077]; endocrine pancreas development [GO:0031018]; immune complex clearance [GO:0002434]; intrinsic apoptotic signaling pathway [GO:0097193]; microglial cell activation [GO:0001774]; microglial cell proliferat…	amyloid-beta binding [GO:0001540]; low-density lipoprotein particle receptor binding [GO:0050750]; misfolded protein binding [GO:0051787]; protein-containing complex binding [GO:0044877]; protein N-terminus binding [GO:0047485]; signaling receptor binding [GO:0005102]; tau protein binding [GO:0048156]; ubiquitin protein ligase binding [GO:0031625]; unfolded protein binding [GO:0051082]	aggresome [GO:0016235]; apical dendrite [GO:0097440]; cell periphery [GO:0071944]; cell surface [GO:0009986]; chromaffin granule [GO:0042583]; cytoplasm [GO:0005737]; cytoskeleton [GO:0005856]; cytosol [GO:0005829]; extracellular space [GO:0005615]; growth cone [GO:0030426]; intracellular membrane-bounded organelle [GO:0043231]; mitochondrial inner membrane [GO:0005743]; mitochondrion [GO:0005739…	GO:0000902; GO:0001540; GO:0001774; GO:0002434; GO:0005102; GO:0005615; GO:0005634; GO:0005737; GO:0005739; GO:0005743; GO:0005829; GO:0005856; GO:0008284; GO:0009615; GO:0009986; GO:0010628; GO:0016235; GO:0017038; GO:0030426; GO:0031018; GO:0031333; GO:0031334; GO:0031625; GO:0032286; GO:0032436; GO:0032760; GO:0032991; GO:0034366; GO:0042127; GO:0042583; GO:0042981; GO:0043005; GO:0043065; GO:…	R-MMU-114608;R-MMU-166665;R-MMU-6803157;R-MMU-977606;	mmu:12759;	17.5947	17.3933	17.4242	17.5231	17.2619	17.9019	17.9057	17.9343	17.7767	17.6794
Grpel1_Q99LP6	-1.09455	-0.885562	-0.215547	-1.05719	-1.08201	0.718116	1.18423	1.37614	0.132538	0.923827	Grpel1	GrpE protein homolog 1, mitochondrial	Q99LP6	1.01917	0.000282384	0.00582724	-0.313965	sp|Q99LP6|GRPE1_MOUSE GrpE protein homolog 1, mitochondrial OS=Mus musculus OX=10090 GN=Grpel1 PE=1 SV=1	FUNCTION: Essential component of the PAM complex, a complex required for the translocation of transit peptide-containing proteins from the inner membrane into the mitochondrial matrix in an ATP-dependent manner. Seems to control the nucleotide-dependent binding of mitochondrial HSP70 to substrate proteins (By similarity). {ECO:0000250}.	SUBCELLULAR LOCATION: Mitochondrion matrix {ECO:0000250}.		protein folding [GO:0006457]; protein import into mitochondrial matrix [GO:0030150]	adenyl-nucleotide exchange factor activity [GO:0000774]; ATPase activator activity [GO:0001671]; ATPase binding [GO:0051117]; chaperone binding [GO:0051087]; identical protein binding [GO:0042802]; protein homodimerization activity [GO:0042803]; unfolded protein binding [GO:0051082]	mitochondrial matrix [GO:0005759]; mitochondrion [GO:0005739]; nucleoplasm [GO:0005654]; PAM complex, Tim23 associated import motor [GO:0001405]	GO:0000774; GO:0001405; GO:0001671; GO:0005654; GO:0005739; GO:0005759; GO:0006457; GO:0030150; GO:0042802; GO:0042803; GO:0051082; GO:0051087; GO:0051117		mmu:17713;	16.3362	16.374	16.4953	16.3429	16.3384	16.6644	16.7488	16.7835	16.5583	16.7016
Serpina3k_P07759	-0.388992	-1.09708	-0.718208	-1.07529	-0.862204	1.43898	1.07556	0.921617	1.02505	-0.319441	Serpina3k	Serine protease inhibitor A3K	P07759	1.02408	0.000283417	0.00582724	-0.459808	sp|P07759|SPA3K_MOUSE Serine protease inhibitor A3K OS=Mus musculus OX=10090 GN=Serpina3k PE=1 SV=2	FUNCTION: Contrapsin inhibits trypsin-like proteases. {ECO:0000269|PubMed:6214866, ECO:0000269|PubMed:6224776}.	SUBCELLULAR LOCATION: Secreted.		negative regulation of endopeptidase activity [GO:0010951]; response to cytokine [GO:0034097]; response to peptide hormone [GO:0043434]	serine-type endopeptidase inhibitor activity [GO:0004867]	collagen-containing extracellular matrix [GO:0062023]; extracellular space [GO:0005615]	GO:0004867; GO:0005615; GO:0010951; GO:0034097; GO:0043434; GO:0062023		mmu:20714;	19.2173	19.0208	19.1259	19.0268	19.086	19.7247	19.6238	19.5811	19.6098	19.2366
Eci1_P42125	-0.473549	-0.940979	-1.27181	-1.36454	-0.315946	1.13525	1.0934	1.11851	0.676861	0.342798	Eci1	Enoyl-CoA delta isomerase 1, mitochondrial	P42125	1.01673	0.000285226	0.00582724	-0.301193	sp|P42125|ECI1_MOUSE Enoyl-CoA delta isomerase 1, mitochondrial OS=Mus musculus OX=10090 GN=Eci1 PE=1 SV=2	FUNCTION: Able to isomerize both 3-cis and 3-trans double bonds into the 2-trans form in a range of enoyl-CoA species. {ECO:0000250|UniProtKB:P23965}.	SUBCELLULAR LOCATION: Mitochondrion matrix {ECO:0000250|UniProtKB:P23965}.		fatty acid beta-oxidation [GO:0006635]	dodecenoyl-CoA delta-isomerase activity [GO:0004165]; enoyl-CoA hydratase activity [GO:0004300]; identical protein binding [GO:0042802]; intramolecular oxidoreductase activity, transposing C=C bonds [GO:0016863]	mitochondrial inner membrane [GO:0005743]; mitochondrial matrix [GO:0005759]; mitochondrion [GO:0005739]	GO:0004165; GO:0004300; GO:0005739; GO:0005743; GO:0005759; GO:0006635; GO:0016863; GO:0042802	R-MMU-77288;	mmu:13177;	18.072	17.9914	17.9343	17.9183	18.0991	18.3494	18.3422	18.3465	18.2703	18.2127
Nedd4_P46935	-0.510462	-0.526214	-1.18975	-1.45364	-0.50904	1.48264	0.659206	1.30474	0.192302	0.550208	Nedd4	E3 ubiquitin-protein ligase NEDD4	P46935	1.02198	0.000285351	0.00582724	-0.402778	sp|P46935|NEDD4_MOUSE E3 ubiquitin-protein ligase NEDD4 OS=Mus musculus OX=10090 GN=Nedd4 PE=1 SV=3	FUNCTION: E3 ubiquitin-protein ligase which accepts ubiquitin from an E2 ubiquitin-conjugating enzyme in the form of a thioester and then directly transfers the ubiquitin to targeted substrates. Specifically ubiquitinates 'Lys-63' in target proteins (By similarity). Monoubiquitinates IGF1R at multiple sites, thus leading to receptor internalization and degradation in lysosomes. Ubiquitinates FGFR…	SUBCELLULAR LOCATION: Cytoplasm. Cell membrane; Peripheral membrane protein. Note=Recruited to the plasma membrane by GRB10. Once complexed with GRB10 and IGF1R, follows IGF1R internalization, remaining associated with early endosomes. Uncouples from IGF1R-containing endosomes before the sorting of the receptor to the lysosomal compartment (By similarity). May be recruited to exosomes by NDFIP1. …		adaptive immune response [GO:0002250]; blood vessel morphogenesis [GO:0048514]; endocardial cushion development [GO:0003197]; negative regulation of sodium ion transmembrane transporter activity [GO:2000650]; negative regulation of sodium ion transport [GO:0010766]; negative regulation of transcription by RNA polymerase II [GO:0000122]; negative regulation of vascular endothelial growth factor re…	ionotropic glutamate receptor binding [GO:0035255]; phosphoserine residue binding [GO:0050815]; phosphothreonine residue binding [GO:0050816]; proline-rich region binding [GO:0070064]; protein C-terminus binding [GO:0008022]; sodium channel inhibitor activity [GO:0019871]; ubiquitin protein ligase activity [GO:0061630]; ubiquitin-protein transferase activity [GO:0004842]	cytoplasm [GO:0005737]; cytosol [GO:0005829]; dendritic spine [GO:0043197]; glutamatergic synapse [GO:0098978]; membrane [GO:0016020]; membrane raft [GO:0045121]; microvillus [GO:0005902]; plasma membrane [GO:0005886]; postsynaptic cytosol [GO:0099524]; ubiquitin ligase complex [GO:0000151]	GO:0000122; GO:0000151; GO:0000209; GO:0002250; GO:0003151; GO:0003197; GO:0004842; GO:0005737; GO:0005829; GO:0005886; GO:0005902; GO:0006511; GO:0006513; GO:0006622; GO:0007528; GO:0008022; GO:0010766; GO:0016020; GO:0016567; GO:0019871; GO:0030948; GO:0031175; GO:0031623; GO:0032801; GO:0035255; GO:0042110; GO:0043161; GO:0043197; GO:0045121; GO:0045732; GO:0048514; GO:0048814; GO:0050807; GO:…	R-MMU-1169408;R-MMU-1253288;R-MMU-8948747;R-MMU-8948751;R-MMU-983168;	mmu:17999;	18.4033	18.3995	18.24	18.1766	18.4037	18.8824	18.6845	18.8396	18.5722	18.6583
Gimap4_Q99JY3	0.159986	-0.814899	-1.54859	-0.921981	-1.01388	0.479654	1.06931	0.787617	1.35711	0.445668	Gimap4	GTPase IMAP family member 4	Q99JY3	1.02736	0.000286845	0.00582724	-0.46051	sp|Q99JY3|GIMA4_MOUSE GTPase IMAP family member 4 OS=Mus musculus OX=10090 GN=Gimap4 PE=1 SV=1	FUNCTION: During thymocyte development, may play a role in the regulation of apoptosis. {ECO:0000269|PubMed:16509771, ECO:0000269|PubMed:16569770}.	SUBCELLULAR LOCATION: Cytoplasm, cytosol {ECO:0000269|PubMed:16509771, ECO:0000269|PubMed:16569770}.			GTP binding [GO:0005525]	cytosol [GO:0005829]	GO:0005525; GO:0005829		mmu:107526;	17.1038	16.8327	16.6286	16.8029	16.7774	17.1927	17.3568	17.2784	17.4368	17.1833
Zcchc6_Q5BLK4	-0.245339	-1.86493	-1.10887	-0.784218	-0.0517504	1.21911	0.786791	0.832462	0.803458	0.413282	Zcchc6	Terminal uridylyltransferase 7	Q5BLK4	1.0678	0.000291001	0.00582724	-0.679917	sp|Q5BLK4|TUT7_MOUSE Terminal uridylyltransferase 7 OS=Mus musculus OX=10090 GN=Tut7 PE=1 SV=3	FUNCTION: Uridylyltransferase that mediates the terminal uridylation of mRNAs with short (less than 25 nucleotides) poly(A) tails, hence facilitating global mRNA decay (PubMed:28792939). Essential for both oocyte maturation and fertility. Through 3' terminal uridylation of mRNA, sculpts, with TUT7, the maternal transcriptome by eliminating transcripts during oocyte growth (PubMed:28792939). Invol…	SUBCELLULAR LOCATION: Cytoplasm {ECO:0000250|UniProtKB:Q5VYS8}.		miRNA metabolic process [GO:0010586]; mRNA polyadenylation [GO:0006378]; mRNA processing [GO:0006397]; negative regulation of transposition, RNA-mediated [GO:0010526]; oocyte maturation [GO:0001556]; polyuridylation-dependent mRNA catabolic process [GO:1990074]; pre-miRNA processing [GO:0031054]; RNA 3'-end processing [GO:0031123]; RNA 3' uridylation [GO:0071076]	miRNA binding [GO:0035198]; nucleotidyltransferase activity [GO:0016779]; polynucleotide adenylyltransferase activity [GO:0004652]; RNA uridylyltransferase activity [GO:0050265]; uridylyltransferase activity [GO:0070569]; zinc ion binding [GO:0008270]	cytoplasm [GO:0005737]; cytosol [GO:0005829]; nucleoplasm [GO:0005654]; nucleus [GO:0005634]	GO:0001556; GO:0004652; GO:0005634; GO:0005654; GO:0005737; GO:0005829; GO:0006378; GO:0006397; GO:0008270; GO:0010526; GO:0010586; GO:0016779; GO:0031054; GO:0031123; GO:0035198; GO:0050265; GO:0070569; GO:0071076; GO:1990074	R-MMU-429947;	mmu:214290;	10.266	9.58715	9.90407	10.0402	10.3472	10.8799	10.6987	10.7178	10.7057	10.5421
Ddhd2_Q80Y98	-0.353171	-0.396738	-0.600072	-1.42092	-1.34332	0.988955	0.848363	1.60287	0.195336	0.478703	Ddhd2	Phospholipase DDHD2	Q80Y98	1.03604	0.00029101	0.00582724	-0.498763	sp|Q80Y98|DDHD2_MOUSE Phospholipase DDHD2 OS=Mus musculus OX=10090 GN=Ddhd2 PE=1 SV=3	FUNCTION: Phospholipase that hydrolyzes preferentially phosphatidic acid, including 1,2-dioleoyl-sn-phosphatidic acid, and phosphatidylethanolamine. Specifically binds to phosphatidylinositol 3-phosphate (PI(3)P), phosphatidylinositol 4-phosphate (PI(4)P), phosphatidylinositol 5-phosphate (PI(5)P) and possibly phosphatidylinositol 4,5-bisphosphate (PI(4,5)P2). May be involved in the maintenance o…	SUBCELLULAR LOCATION: Cytoplasm, cytosol {ECO:0000250}. Endoplasmic reticulum-Golgi intermediate compartment {ECO:0000250}. Golgi apparatus, cis-Golgi network {ECO:0000250}. Note=Cycles between the Golgi apparatus and the cytosol. DDHD2 recruitment to the Golgi/endoplasmic reticulum-Golgi intermediate compartment (ERGIC) is regulated by the levels of phosphoinositides, including PI(4)P (By simila…		lipid droplet organization [GO:0034389]; locomotory behavior [GO:0007626]; positive regulation of mitochondrial fission [GO:0090141]; triglyceride catabolic process [GO:0019433]; visual learning [GO:0008542]	metal ion binding [GO:0046872]; phospholipase activity [GO:0004620]; triglyceride lipase activity [GO:0004806]	centriolar satellite [GO:0034451]; COPII-coated ER to Golgi transport vesicle [GO:0030134]; cytoplasm [GO:0005737]; cytosol [GO:0005829]; endoplasmic reticulum-Golgi intermediate compartment [GO:0005793]; Golgi apparatus [GO:0005794]; membrane [GO:0016020]	GO:0004620; GO:0004806; GO:0005737; GO:0005793; GO:0005794; GO:0005829; GO:0007626; GO:0008542; GO:0016020; GO:0019433; GO:0030134; GO:0034389; GO:0034451; GO:0046872; GO:0090141	R-MMU-1483166;	mmu:72108;	13.9827	13.9695	13.9079	13.6591	13.6826	14.3894	14.3468	14.5755	14.1489	14.2348
Prdx6_O08709	-0.579437	-0.557384	-0.700995	-1.24474	-1.10178	1.9252	0.570755	0.581097	0.312821	0.794466	Prdx6	Peroxiredoxin-6	O08709	1.02267	0.000291734	0.00582724	-0.403816	sp|O08709|PRDX6_MOUSE Peroxiredoxin-6 OS=Mus musculus OX=10090 GN=Prdx6 PE=1 SV=3	FUNCTION: Thiol-specific peroxidase that catalyzes the reduction of hydrogen peroxide and organic hydroperoxides to water and alcohols, respectively (By similarity). Can reduce H(2)O(2) and short chain organic, fatty acid, and phospholipid hydroperoxides (By similarity). Has phospholipase activity (PubMed:26830860). Can either reduce the oxidized sn-2 fatty acyl group of phospholipids (peroxidase…	SUBCELLULAR LOCATION: Cytoplasm {ECO:0000250|UniProtKB:O35244}. Lysosome {ECO:0000250|UniProtKB:O35244}. Note=Also found in lung secretory organelles (lamellar bodies). {ECO:0000250|UniProtKB:O35244}.		bleb assembly [GO:0032060]; cell redox homeostasis [GO:0045454]; cellular oxidant detoxification [GO:0098869]; glycerophospholipid catabolic process [GO:0046475]; hydrogen peroxide catabolic process [GO:0042744]; positive regulation of mRNA splicing, via spliceosome [GO:0048026]; response to oxidative stress [GO:0006979]; response to reactive oxygen species [GO:0000302]	1-acylglycerophosphocholine O-acyltransferase activity [GO:0047184]; calcium-independent phospholipase A2 activity [GO:0047499]; glutathione peroxidase activity [GO:0004602]; identical protein binding [GO:0042802]; peroxidase activity [GO:0004601]; peroxiredoxin activity [GO:0051920]; phospholipase A2 activity [GO:0004623]; phospholipase A2 activity (consuming 1,2-dipalmitoylphosphatidylcholine) …	cytoplasm [GO:0005737]; cytosol [GO:0005829]; lysosome [GO:0005764]; mitochondrion [GO:0005739]; nucleus [GO:0005634]; perinuclear region of cytoplasm [GO:0048471]	GO:0000302; GO:0004601; GO:0004602; GO:0004623; GO:0005634; GO:0005737; GO:0005739; GO:0005764; GO:0005829; GO:0006979; GO:0031625; GO:0032060; GO:0042744; GO:0042802; GO:0045454; GO:0046475; GO:0047184; GO:0047499; GO:0048026; GO:0048471; GO:0051920; GO:0098869; GO:0102567; GO:0102568	R-MMU-3299685;R-MMU-6798695;	mmu:11758;	17.8786	17.8839	17.8492	17.7181	17.7526	18.4829	18.1561	18.1586	18.0938	18.2101
Sptbn1_Q62261	-0.541872	-0.818031	-1.15643	-1.39141	-0.356871	1.48416	0.936048	1.10837	0.197435	0.538599	Sptbn1	Spectrin beta chain, non-erythrocytic 1	Q62261	1.01624	0.000292081	0.00582724	-0.344684	sp|Q62261|SPTB2_MOUSE Spectrin beta chain, non-erythrocytic 1 OS=Mus musculus OX=10090 GN=Sptbn1 PE=1 SV=2	FUNCTION: Fodrin, which seems to be involved in secretion, interacts with calmodulin in a calcium-dependent manner and is thus candidate for the calcium-dependent movement of the cytoskeleton at the membrane.	SUBCELLULAR LOCATION: Cytoplasm, cytoskeleton {ECO:0000305}. Endomembrane system {ECO:0000269|PubMed:15262991}. Cytoplasm, myofibril, sarcomere, M line {ECO:0000269|PubMed:15262991}. Note=Colocalizes with ANK2 in a distinct intracellular compartment of neonatal cardiomyocytes. {ECO:0000269|PubMed:15262991}.; SUBCELLULAR LOCATION: [Isoform 2]: Cytoplasm {ECO:0000269|PubMed:9927192}. Cell membrane …		actin filament capping [GO:0051693]; common-partner SMAD protein phosphorylation [GO:0007182]; Golgi to plasma membrane protein transport [GO:0043001]; membrane assembly [GO:0071709]; mitotic cytokinesis [GO:0000281]; plasma membrane organization [GO:0007009]; positive regulation of interleukin-2 production [GO:0032743]; positive regulation of protein localization to plasma membrane [GO:1903078];…	actin binding [GO:0003779]; ankyrin binding [GO:0030506]; calmodulin binding [GO:0005516]; GTPase binding [GO:0051020]; phospholipid binding [GO:0005543]; protein-containing complex binding [GO:0044877]; structural constituent of cytoskeleton [GO:0005200]	axolemma [GO:0030673]; cortical cytoskeleton [GO:0030863]; cuticular plate [GO:0032437]; cytoplasm [GO:0005737]; endomembrane system [GO:0012505]; glutamatergic synapse [GO:0098978]; M band [GO:0031430]; membrane [GO:0016020]; nucleolus [GO:0005730]; nucleus [GO:0005634]; plasma membrane [GO:0005886]; postsynaptic density [GO:0014069]; protein-containing complex [GO:0032991]; spectrin [GO:0008091]	GO:0000281; GO:0003779; GO:0005200; GO:0005516; GO:0005543; GO:0005634; GO:0005730; GO:0005737; GO:0005886; GO:0007009; GO:0007182; GO:0008091; GO:0012505; GO:0014069; GO:0016020; GO:0030506; GO:0030673; GO:0030863; GO:0031430; GO:0032437; GO:0032743; GO:0032991; GO:0043001; GO:0044877; GO:0051020; GO:0051693; GO:0060390; GO:0071709; GO:0072659; GO:0098978; GO:1903076; GO:1903078	R-MMU-375165;R-MMU-445095;R-MMU-5673001;R-MMU-6807878;	mmu:20742;	21.2879	21.2321	21.1637	21.1162	21.3253	21.6973	21.5865	21.6213	21.4373	21.5062
Mycbp2_Q7TPH6	-0.572451	-0.724297	-1.04564	-1.25452	-0.6749	1.65419	0.504369	0.720109	0.174418	1.21873	Mycbp2	E3 ubiquitin-protein ligase MYCBP2	Q7TPH6	1.02049	0.000294087	0.00582724	-0.340042	sp|Q7TPH6|MYCB2_MOUSE E3 ubiquitin-protein ligase MYCBP2 OS=Mus musculus OX=10090 GN=Mycbp2 PE=1 SV=3	FUNCTION: Atypical E3 ubiquitin-protein ligase which specifically mediates ubiquitination of threonine and serine residues on target proteins, instead of ubiquitinating lysine residues (By similarity). Shows esterification activity towards both threonine and serine, with a preference for threonine, and acts via two essential catalytic cysteine residues that relay ubiquitin to its substrate via th…	SUBCELLULAR LOCATION: Nucleus {ECO:0000269|PubMed:26304119}. Cell projection, axon {ECO:0000269|PubMed:18031680}. Cytoplasm, cytoskeleton {ECO:0000269|PubMed:18031680}. Note=Localizes to axon shafts and associates with microtubule cytoskeleton (PubMed:18031680). Translocates to the nucleus following interaction with sumoylated RANGAP1 (PubMed:26304119). {ECO:0000269|PubMed:18031680, ECO:0000269|P…		branchiomotor neuron axon guidance [GO:0021785]; cell morphogenesis involved in neuron differentiation [GO:0048667]; central nervous system projection neuron axonogenesis [GO:0021952]; circadian regulation of gene expression [GO:0032922]; motor neuron axon guidance [GO:0008045]; negative regulation of protein catabolic process [GO:0042177]; neuromuscular process [GO:0050905]; positive regulation …	guanyl-nucleotide exchange factor activity [GO:0005085]; identical protein binding [GO:0042802]; Ran GTPase binding [GO:0008536]; ubiquitin protein ligase activity [GO:0061630]; zinc ion binding [GO:0008270]	axon [GO:0030424]; cytoplasm [GO:0005737]; intracellular membrane-bounded organelle [GO:0043231]; microtubule cytoskeleton [GO:0015630]; nucleoplasm [GO:0005654]; nucleus [GO:0005634]	GO:0005085; GO:0005634; GO:0005654; GO:0005737; GO:0008045; GO:0008270; GO:0008536; GO:0015630; GO:0016567; GO:0021785; GO:0021952; GO:0030424; GO:0031398; GO:0032880; GO:0032922; GO:0042177; GO:0042802; GO:0043231; GO:0048667; GO:0050905; GO:0051493; GO:0061630; GO:1902667		mmu:105689;	16.6523	16.6221	16.5581	16.5166	16.6319	17.0954	16.8666	16.9095	16.8009	17.0088
[truncated: 4,701 more rows]

## Sheet: Phospho
	Normalized Log2 Intensity, Row Z Score														RSW-VehW																		Normalized Log2 Intensity
FEATURE	RS1W	RS2W	RS3W	RS4W	RS5W	VEH1W	VEH2W	VEH3W	VEH4W	VEH5W	GENE	PROTEIN	UNIPROT	MAXFC	P.VALUE	ADJ.P.VAL	LOGFC	FASTA_HEADERS	UNIPROT_FUNCTION	UNIPROT_CELLULAR_LOCATION	UNIPROT_DISEASE	GO_BIOLOGICAL_PROCESS	GO_MOLECULAR_FUNCTION	GO_CELLULAR_COMPONENT	GO_ID	REACTOMEID	KEGG_ID	PROTEINS	LOCALIZATION PROBABILITY	SITE PROBABILITIES	AMINO ACID	PEPTIDE SEQUENCE	RS1W.1	RS2W.1	RS3W.1	RS4W.1	RS5W.1	VEH1W.1	VEH2W.1	VEH3W.1	VEH4W.1	VEH5W.1
[truncated: 5,775 more rows]
