# Supplementary material for: The cyclin dependent kinase inhibitor Roscovitine prevents diet-induced metabolic disruption in obese mice
Source: Sci Rep. 2021 Oct 13;11:20365. doi: 10.1038/s41598-021-99871-z (PMC8514475; doi:10.1038/s41598-021-99871-z)
Supplement: Supplementary file 3 — Supplementary Information 3. [file 41598_2021_99871_MOESM3_ESM.xlsx]

## Sheet: Proteomics
	Normalized Log2 Intensity, Row Z Score														RSB-VehB													Normalized Log2 Intensity
FEATURE	RS1B	RS2B	RS3B	RS4B	RS5B	VEH1B	VEH2B	VEH3B	VEH4B	VEH5B	GENE	PROTEIN	UNIPROT	MAXFC	P.VALUE	ADJ.P.VAL	LOGFC	FASTA_HEADERS	UNIPROT_FUNCTION	UNIPROT_CELLULAR_LOCATION	UNIPROT_DISEASE	GO_BIOLOGICAL_PROCESS	GO_MOLECULAR_FUNCTION	GO_CELLULAR_COMPONENT	GO_ID	REACTOMEID	KEGG_ID	RS1B.1	RS2B.1	RS3B.1	RS4B.1	RS5B.1	VEH1B.1	VEH2B.1	VEH3B.1	VEH4B.1	VEH5B.1
Sdc4_O35988	0.382111	0.873305	1.3536	1.23224	0.722255	-0.922207	-0.820187	-1.09698	-0.806514	-0.917617	Sdc4	Syndecan-4	O35988	1.06775	6.08513e-07	0.00237138	0.824619	sp|O35988|SDC4_MOUSE Syndecan-4 OS=Mus musculus OX=10090 GN=Sdc4 PE=1 SV=1	FUNCTION: Cell surface proteoglycan that bears heparan sulfate. Regulates exosome biogenesis in concert with SDCBP and PDCD6IP. {ECO:0000250|UniProtKB:P31431}.	SUBCELLULAR LOCATION: Membrane {ECO:0000255}; Single-pass type I membrane protein {ECO:0000255}. Secreted {ECO:0000269|PubMed:10684261}. Note=Shedding of the ectodomain produces a soluble form. {ECO:0000269|PubMed:10684261}.		cell migration [GO:0016477]; inner ear receptor cell stereocilium organization [GO:0060122]; negative regulation of T cell proliferation [GO:0042130]; neural tube closure [GO:0001843]; positive regulation of exosomal secretion [GO:1903543]; positive regulation of extracellular exosome assembly [GO:1903553]; positive regulation of focal adhesion assembly [GO:0051894]; positive regulation of protei…	fibronectin binding [GO:0001968]; identical protein binding [GO:0042802]; protein kinase C binding [GO:0005080]; thrombospondin receptor activity [GO:0070053]	cell surface [GO:0009986]; costamere [GO:0043034]; extracellular region [GO:0005576]; focal adhesion [GO:0005925]; Golgi lumen [GO:0005796]; integral component of membrane [GO:0016021]; membrane raft [GO:0045121]	GO:0001657; GO:0001843; GO:0001968; GO:0005080; GO:0005576; GO:0005796; GO:0005925; GO:0009986; GO:0010762; GO:0016021; GO:0016477; GO:0042060; GO:0042130; GO:0042802; GO:0043034; GO:0045121; GO:0045860; GO:0051496; GO:0051894; GO:0060122; GO:0070053; GO:1903543; GO:1903553	R-MMU-1971475;R-MMU-2022928;R-MMU-2024096;R-MMU-202733;R-MMU-3000170;R-MMU-975634;	mmu:20971;	12.7565	12.9784	13.1954	13.1405	12.9102	12.1673	12.2134	12.0883	12.2195	12.1694
Inmt_P40936	-1.13147	-1.27277	-0.537567	-1.01998	-0.632035	1.10058	1.13437	0.829464	0.852461	0.676943	Inmt	Indolethylamine N-methyltransferase	P40936	1.02593	3.52712e-06	0.0059625	-0.359972	sp|P40936|INMT_MOUSE Indolethylamine N-methyltransferase OS=Mus musculus OX=10090 GN=Inmt PE=1 SV=1	FUNCTION: Catalyzes the N-methylation of tryptamine and structurally related compounds (By similarity). Functions as thioether S-methyltransferase and is active with a variety of thioethers and the corresponding selenium and tellurium compounds, including 3-methylthiopropionaldehyde, dimethyl selenide, dimethyl telluride, 2-methylthioethylamine, 2-methylthioethanol, methyl-n-propyl sulfide and di…	SUBCELLULAR LOCATION: Cytoplasm {ECO:0000269|PubMed:3350800}.		amine metabolic process [GO:0009308]; methylation [GO:0032259]; response to toxic substance [GO:0009636]	amine N-methyltransferase activity [GO:0030748]; dimethyl selenide methyltransferase activity [GO:0098615]; N-methyltransferase activity [GO:0008170]; S-adenosyl-L-methionine:beta-alanine N-methyltransferase activity [GO:0102707]; thioether S-methyltransferase activity [GO:0004790]	cytoplasm [GO:0005737]; cytosol [GO:0005829]	GO:0004790; GO:0005737; GO:0005829; GO:0008170; GO:0009308; GO:0009636; GO:0030748; GO:0032259; GO:0098615; GO:0102707		mmu:21743;	13.8388	13.8111	13.9551	13.8606	13.9366	14.276	14.2826	14.2229	14.2274	14.193
Cp_Q61147	0.785243	1.2385	1.28365	0.732746	0.536149	-0.850025	-1.06824	-1.14884	-0.58868	-0.920504	Cp	Ceruloplasmin	Q61147	1.02085	4.59007e-06	0.0059625	0.360824	sp|Q61147|CERU_MOUSE Ceruloplasmin OS=Mus musculus OX=10090 GN=Cp PE=1 SV=2	FUNCTION: Ceruloplasmin is a blue, copper-binding (6-7 atoms per molecule) glycoprotein. It has ferroxidase activity oxidizing Fe(2+) to Fe(3+) without releasing radical oxygen species. It is involved in iron transport across the cell membrane. Provides Cu(2+) ions for the ascorbate-mediated deaminase degradation of the heparan sulfate chains of GPC1. May also play a role in fetal lung developmen…	SUBCELLULAR LOCATION: Secreted. Note=Colocalizes with GCP1 in secretory intracellular compartments. {ECO:0000250}.		copper ion transport [GO:0006825]; iron ion homeostasis [GO:0055072]; iron ion transport [GO:0006826]; response to copper ion [GO:0046688]	chaperone binding [GO:0051087]; copper ion binding [GO:0005507]; ferroxidase activity [GO:0004322]; oxidoreductase activity [GO:0016491]	anchored component of plasma membrane [GO:0046658]; extracellular space [GO:0005615]; plasma membrane [GO:0005886]	GO:0004322; GO:0005507; GO:0005615; GO:0005886; GO:0006825; GO:0006826; GO:0016491; GO:0046658; GO:0046688; GO:0051087; GO:0055072	R-MMU-381426;R-MMU-425410;R-MMU-8957275;R-MMU-917937;	mmu:12870;	17.6402	17.7295	17.7384	17.6298	17.5911	17.3178	17.2748	17.2589	17.3693	17.3039
Plin5_Q8BVZ1	0.822728	0.937385	1.23904	0.629757	0.942872	-1.41555	-0.793181	-0.703612	-0.586034	-1.0734	Plin5	Perilipin-5	Q8BVZ1	1.02016	1.13451e-05	0.0089877	0.302566	sp|Q8BVZ1|PLIN5_MOUSE Perilipin-5 OS=Mus musculus OX=10090 GN=Plin5 PE=1 SV=1	FUNCTION: Lipid droplet-associated protein that maintains the balance between lipogenesis and lipolysis and also regulates fatty acid oxidation in oxidative tissues. Recruits mitochondria to the surface of lipid droplets and is involved in lipid droplet homeostasis by regulating both the storage of fatty acids in the form of triglycerides and the release of fatty acids for mitochondrial fatty aci…	SUBCELLULAR LOCATION: Lipid droplet {ECO:0000269|PubMed:16571721, ECO:0000269|PubMed:17130488, ECO:0000269|PubMed:17234449, ECO:0000269|PubMed:19717842, ECO:0000269|PubMed:23345411}. Cytoplasm {ECO:0000269|PubMed:17234449, ECO:0000269|PubMed:19717842}. Mitochondrion {ECO:0000250|UniProtKB:M0R7Z9}. Note=Lipid droplet surface-associated (PubMed:17234449, PubMed:17130488, PubMed:16571721). Exchanges…		lipid droplet organization [GO:0034389]; lipid metabolic process [GO:0006629]; lipid storage [GO:0019915]; mitochondrion localization [GO:0051646]; negative regulation of fatty acid beta-oxidation [GO:0031999]; negative regulation of lipase activity [GO:0060192]; negative regulation of lipid catabolic process [GO:0050995]; negative regulation of peroxisome proliferator activated receptor signalin…	identical protein binding [GO:0042802]; lipase binding [GO:0035473]	cytoplasm [GO:0005737]; cytosol [GO:0005829]; intracellular membrane-bounded organelle [GO:0043231]; lipid droplet [GO:0005811]; mitochondrion [GO:0005739]	GO:0005737; GO:0005739; GO:0005811; GO:0005829; GO:0006629; GO:0010867; GO:0010884; GO:0010890; GO:0010897; GO:0019915; GO:0031999; GO:0032000; GO:0034389; GO:0035359; GO:0035473; GO:0042802; GO:0043231; GO:0050995; GO:0051646; GO:0060192; GO:0060193; GO:2000378		mmu:66968;	15.2945	15.3134	15.3633	15.2625	15.3143	14.9241	15.0271	15.0419	15.0614	14.9807
Csnk1a1_Q8BK63	-0.453836	-0.97723	-1.03282	-0.991078	-0.947653	0.712913	1.58446	0.358357	0.542499	1.20439	Csnk1a1	Casein kinase I isoform alpha	Q8BK63	1.05851	1.15316e-05	0.0089877	-0.795901	sp|Q8BK63|KC1A_MOUSE Casein kinase I isoform alpha OS=Mus musculus OX=10090 GN=Csnk1a1 PE=1 SV=2	FUNCTION: Casein kinases are operationally defined by their preferential utilization of acidic proteins such as caseins as substrates. Can phosphorylate a large number of proteins. Participates in Wnt signaling. Phosphorylates CTNNB1 at 'Ser-45'. May phosphorylate PER1 and PER2. May play a role in segregating chromosomes during mitosis. May play a role in keratin cytoskeleton disassembly and ther…	SUBCELLULAR LOCATION: Cytoplasm {ECO:0000250|UniProtKB:P48729}. Cytoplasm, cytoskeleton, microtubule organizing center, centrosome {ECO:0000250|UniProtKB:P48729}. Chromosome, centromere, kinetochore {ECO:0000250|UniProtKB:P48729}. Nucleus speckle {ECO:0000250|UniProtKB:P48729}. Cytoplasm, cytoskeleton, cilium basal body {ECO:0000269|PubMed:25644602}. Note=Localizes to the centrosome in interphase…		cell cycle [GO:0007049]; cell division [GO:0051301]; cell morphogenesis [GO:0000902]; Golgi organization [GO:0007030]; intermediate filament cytoskeleton organization [GO:0045104]; negative regulation of canonical Wnt signaling pathway [GO:0090090]; peptidyl-serine phosphorylation [GO:0018105]; positive regulation of proteasomal ubiquitin-dependent protein catabolic process [GO:0032436]; protein …	ATP binding [GO:0005524]; magnesium ion binding [GO:0000287]; peptide binding [GO:0042277]; phosphoprotein binding [GO:0051219]; protein kinase activity [GO:0004672]; protein serine/threonine kinase activity [GO:0004674]; protein serine kinase activity [GO:0106310]; protein threonine kinase activity [GO:0106311]	beta-catenin destruction complex [GO:0030877]; centrosome [GO:0005813]; ciliary basal body [GO:0036064]; cilium [GO:0005929]; condensed chromosome kinetochore [GO:0000777]; cytoplasm [GO:0005737]; cytosol [GO:0005829]; nuclear speck [GO:0016607]; nucleus [GO:0005634]; ribonucleoprotein complex [GO:1990904]	GO:0000287; GO:0000777; GO:0000902; GO:0004672; GO:0004674; GO:0005524; GO:0005634; GO:0005737; GO:0005813; GO:0005829; GO:0005929; GO:0006468; GO:0007030; GO:0007049; GO:0016055; GO:0016607; GO:0018105; GO:0030877; GO:0032436; GO:0036064; GO:0042277; GO:0045104; GO:0051219; GO:0051301; GO:0090090; GO:0106310; GO:0106311; GO:1904424; GO:1990904	R-MMU-195253;R-MMU-196299;R-MMU-4641262;R-MMU-5610785;R-MMU-5635838;		13.795	13.5585	13.5334	13.5522	13.5719	14.3224	14.7162	14.1621	14.2453	14.5445
Plin2_P43883	0.384982	0.977925	0.539929	1.56239	0.9133	-1.39853	-0.813875	-0.68924	-0.469324	-1.00756	Plin2	Perilipin-2	P43883	1.05193	1.53518e-05	0.00918333	0.837463	sp|P43883|PLIN2_MOUSE Perilipin-2 OS=Mus musculus OX=10090 GN=Plin2 PE=1 SV=2	FUNCTION: May be involved in development and maintenance of adipose tissue. {ECO:0000305|PubMed:1518805}.	SUBCELLULAR LOCATION: Membrane {ECO:0000305|PubMed:1518805}; Peripheral membrane protein {ECO:0000305|PubMed:1518805}. Lipid droplet {ECO:0000269|PubMed:9392423}.		lipid storage [GO:0019915]; long-chain fatty acid transport [GO:0015909]; positive regulation of sequestering of triglyceride [GO:0010890]; response to drug [GO:0042493]; response to organic cyclic compound [GO:0014070]		cytoplasm [GO:0005737]; cytosol [GO:0005829]; lipid droplet [GO:0005811]; nucleus [GO:0005634]; plasma membrane [GO:0005886]	GO:0005634; GO:0005737; GO:0005811; GO:0005829; GO:0005886; GO:0010890; GO:0014070; GO:0015909; GO:0019915; GO:0042493		mmu:11520;	16.7297	17.0133	16.8038	17.2927	16.9824	15.8769	16.1565	16.2161	16.3212	16.0639
Mrps2_Q924T2	0.50909	0.67284	1.43117	1.22132	0.737003	-0.933037	-0.845309	-0.945127	-1.02201	-0.825943	Mrps2	28S ribosomal protein S2, mitochondrial	Q924T2	1.01954	1.64956e-05	0.00918333	0.281843	sp|Q924T2|RT02_MOUSE 28S ribosomal protein S2, mitochondrial OS=Mus musculus OX=10090 GN=Mrps2 PE=1 SV=1	FUNCTION: Required for mitoribosome formation and stability, and mitochondrial translation. {ECO:0000250|UniProtKB:Q9Y399}.	SUBCELLULAR LOCATION: Mitochondrion {ECO:0000250|UniProtKB:Q9Y399}.		mitochondrial ribosome assembly [GO:0061668]; mitochondrial translation [GO:0032543]	structural constituent of ribosome [GO:0003735]	mitochondrial small ribosomal subunit [GO:0005763]; mitochondrion [GO:0005739]	GO:0003735; GO:0005739; GO:0005763; GO:0032543; GO:0061668	R-MMU-5389840;R-MMU-5419276;	mmu:118451;	14.6468	14.672	14.7889	14.7565	14.6819	14.4245	14.438	14.4226	14.4108	14.441
Rpsa_P14206	0.299484	0.884488	1.22904	1.07854	0.978743	-0.885006	-1.33288	-1.04854	-0.838987	-0.364884	Rpsa	40S ribosomal protein SA	P14206	1.0215	1.96039e-05	0.00954956	0.355343	sp|P14206|RSSA_MOUSE 40S ribosomal protein SA OS=Mus musculus OX=10090 GN=Rpsa PE=1 SV=4	FUNCTION: Required for the assembly and/or stability of the 40S ribosomal subunit. Required for the processing of the 20S rRNA-precursor to mature 18S rRNA in a late step of the maturation of 40S ribosomal subunits. Also functions as a cell surface receptor for laminin. Plays a role in cell adhesion to the basement membrane and in the consequent activation of signaling transduction pathways. May …	SUBCELLULAR LOCATION: Cell membrane. Cytoplasm. Nucleus. Note=67LR is found at the surface of the plasma membrane, with its C-terminal laminin-binding domain accessible to extracellular ligands. 37LRP is found at the cell surface, in the cytoplasm and in the nucleus. Colocalizes with PPP1R16B in the cell membrane (By similarity). 37LRP shuttles to the nucleus upon midkine (MDK) binding. {ECO:0000…		cell-cell adhesion [GO:0098609]; cytoplasmic translation [GO:0002181]; epithelial cell differentiation [GO:0030855]; ribosomal small subunit assembly [GO:0000028]; translation [GO:0006412]	laminin binding [GO:0043236]; laminin receptor activity [GO:0005055]; ribosome binding [GO:0043022]; structural constituent of ribosome [GO:0003735]	basement membrane [GO:0005604]; collagen-containing extracellular matrix [GO:0062023]; cytoplasm [GO:0005737]; cytosol [GO:0005829]; cytosolic small ribosomal subunit [GO:0022627]; glutamatergic synapse [GO:0098978]; membrane [GO:0016020]; neuronal cell body [GO:0043025]; nucleus [GO:0005634]; plasma membrane [GO:0005886]; small ribosomal subunit [GO:0015935]; synapse [GO:0045202]	GO:0000028; GO:0002181; GO:0003735; GO:0005055; GO:0005604; GO:0005634; GO:0005737; GO:0005829; GO:0005886; GO:0006412; GO:0015935; GO:0016020; GO:0022627; GO:0030855; GO:0043022; GO:0043025; GO:0043236; GO:0045202; GO:0062023; GO:0098609; GO:0098978	R-MMU-156827;R-MMU-1799339;R-MMU-6791226;R-MMU-72649;R-MMU-72689;R-MMU-72695;R-MMU-72702;R-MMU-72706;R-MMU-975956;R-MMU-975957;	mmu:16785;	16.7615	16.8777	16.9462	16.9163	16.8965	16.5261	16.4371	16.4936	16.5352	16.6295
Cpt1a_P97742	1.31768	0.964559	1.32244	0.59172	0.328796	-0.944205	-0.771615	-0.983947	-0.862046	-0.963374	Cpt1a	Carnitine O-palmitoyltransferase 1, liver isoform	P97742	1.01943	2.59963e-05	0.0112564	0.28404	sp|P97742|CPT1A_MOUSE Carnitine O-palmitoyltransferase 1, liver isoform OS=Mus musculus OX=10090 GN=Cpt1a PE=1 SV=4	FUNCTION: Catalyzes the transfer of the acyl group of long-chain fatty acid-CoA conjugates onto carnitine, an essential step for the mitochondrial uptake of long-chain fatty acids and their subsequent beta-oxidation in the mitochondrion (PubMed:16169268, PubMed:17030509). Plays an important role in hepatic triglyceride metabolism (By similarity). {ECO:0000250|UniProtKB:P32198, ECO:0000269|PubMed:…	SUBCELLULAR LOCATION: Mitochondrion outer membrane {ECO:0000250|UniProtKB:P50416}; Multi-pass membrane protein {ECO:0000255}.		carnitine metabolic process [GO:0009437]; cellular response to fatty acid [GO:0071398]; eating behavior [GO:0042755]; epithelial cell differentiation [GO:0030855]; fatty acid beta-oxidation [GO:0006635]; fatty acid metabolic process [GO:0006631]; glucose metabolic process [GO:0006006]; lipid localization [GO:0010876]; liver regeneration [GO:0097421]; long-chain fatty acid metabolic process [GO:00…	carnitine O-palmitoyltransferase activity [GO:0004095]; identical protein binding [GO:0042802]; palmitoleoyltransferase activity [GO:1990698]	integral component of membrane [GO:0016021]; integral component of mitochondrial outer membrane [GO:0031307]; intracellular membrane-bounded organelle [GO:0043231]; mitochondrial inner membrane [GO:0005743]; mitochondrial outer membrane [GO:0005741]; mitochondrion [GO:0005739]	GO:0001676; GO:0004095; GO:0005739; GO:0005741; GO:0005743; GO:0006006; GO:0006631; GO:0006635; GO:0006641; GO:0009437; GO:0010876; GO:0010883; GO:0014070; GO:0016021; GO:0030855; GO:0031307; GO:0031667; GO:0032000; GO:0042493; GO:0042755; GO:0042802; GO:0043231; GO:0043279; GO:0045471; GO:0046320; GO:0046677; GO:0050796; GO:0071398; GO:0097421; GO:1904772; GO:1990698	R-MMU-200425;R-MMU-5362517;	mmu:12894;	14.9675	14.9121	14.9683	14.8536	14.8124	14.6126	14.6397	14.6064	14.6255	14.6096
Tamm41_Q3TUH1	0.634438	1.06767	0.552154	0.97834	1.23791	-1.4479	-1.08761	-0.944596	-0.471922	-0.518486	Tamm41	Phosphatidate cytidylyltransferase, mitochondrial	Q3TUH1	1.02259	2.91115e-05	0.0113447	0.316468	sp|Q3TUH1|TAM41_MOUSE Phosphatidate cytidylyltransferase, mitochondrial OS=Mus musculus OX=10090 GN=Tamm41 PE=1 SV=2	FUNCTION: Catalyzes the conversion of phosphatidic acid (PA) to CDP-diacylglycerol (CDP-DAG), an essential intermediate in the synthesis of phosphatidylglycerol, cardiolipin and phosphatidylinositol. {ECO:0000250|UniProtKB:D3ZKT0}.	SUBCELLULAR LOCATION: Mitochondrion inner membrane {ECO:0000250|UniProtKB:D3ZKT0}; Peripheral membrane protein {ECO:0000250|UniProtKB:D3ZKT0}; Matrix side {ECO:0000250|UniProtKB:P53230}.		cardiolipin biosynthetic process [GO:0032049]; CDP-diacylglycerol biosynthetic process [GO:0016024]	phosphatidate cytidylyltransferase activity [GO:0004605]	extrinsic component of membrane [GO:0019898]; extrinsic component of mitochondrial inner membrane [GO:0031314]; mitochondrial inner membrane [GO:0005743]; mitochondrion [GO:0005739]	GO:0004605; GO:0005739; GO:0005743; GO:0016024; GO:0019898; GO:0031314; GO:0032049			14.2826	14.3593	14.2681	14.3435	14.3894	13.9141	13.9779	14.0032	14.0868	14.0786
Ngp_O08692	1.35701	0.934191	1.38407	0.461872	0.137415	-0.72265	-0.989301	-0.328132	-1.24549	-0.988985	Ngp	Neutrophilic granule protein	O08692	1.08008	4.65522e-05	0.0162494	1.03873	sp|O08692|NGP_MOUSE Neutrophilic granule protein OS=Mus musculus OX=10090 GN=Ngp PE=1 SV=1	FUNCTION: Acts as an inhibitor of cathepsin B (CTSB) activity. Plays a role as a negative regulator of tumor vascular development, cell invasion and metastasis. {ECO:0000269|PubMed:21518852}.	SUBCELLULAR LOCATION: Secreted {ECO:0000269|PubMed:21518852}. Cytoplasmic granule {ECO:0000269|PubMed:8749713}. Note=Localizes in cytoplasmic granules of neutrophilic precursors (PubMed:8749713). {ECO:0000269|PubMed:21518852, ECO:0000269|PubMed:8749713}.		defense response [GO:0006952]; negative regulation of angiogenesis [GO:0016525]; negative regulation of lymphangiogenesis [GO:1901491]	cysteine-type endopeptidase inhibitor activity [GO:0004869]	cytoplasmic vesicle [GO:0031410]; extracellular space [GO:0005615]	GO:0004869; GO:0005615; GO:0006952; GO:0016525; GO:0031410; GO:1901491		mmu:18054;	14.3156	14.0587	14.3321	13.7718	13.5747	13.0522	12.8902	13.2919	12.7346	12.8904
Itgam_P05555	0.692748	1.3856	0.832907	0.762838	0.617439	-1.73152	-1.05192	-0.684503	-0.287386	-0.536205	Itgam	Integrin alpha-M	P05555	1.05298	5.00366e-05	0.0162494	0.637067	sp|P05555|ITAM_MOUSE Integrin alpha-M OS=Mus musculus OX=10090 GN=Itgam PE=1 SV=2	FUNCTION: Integrin ITGAM/ITGB2 is implicated in various adhesive interactions of monocytes, macrophages and granulocytes as well as in mediating the uptake of complement-coated particles and pathogens (By similarity). It is identical with CR-3, the receptor for the iC3b fragment of the third complement component. It probably recognizes the R-G-D peptide in C3b. Integrin ITGAM/ITGB2 is also a rece…	SUBCELLULAR LOCATION: Cell membrane {ECO:0000269|PubMed:8986723, ECO:0000269|PubMed:9862668}; Single-pass type I membrane protein {ECO:0000250|UniProtKB:P11215}. Membrane raft {ECO:0000250|UniProtKB:P11215}; Single-pass type I membrane protein {ECO:0000250|UniProtKB:P11215}.		activated T cell proliferation [GO:0050798]; amyloid-beta clearance [GO:0097242]; apoptotic signaling pathway [GO:0097190]; cell adhesion [GO:0007155]; cell-cell adhesion [GO:0098609]; cell surface receptor signaling pathway involved in cell-cell signaling [GO:1905114]; cellular extravasation [GO:0045123]; complement-mediated synapse pruning [GO:0150062]; forebrain development [GO:0030900]; integ…	cargo receptor activity [GO:0038024]; complement component C3b binding [GO:0001851]; heat shock protein binding [GO:0031072]; heparan sulfate proteoglycan binding [GO:0043395]; heparin binding [GO:0008201]; metal ion binding [GO:0046872]; opsonin binding [GO:0001846]; protein-containing complex binding [GO:0044877]	cell surface [GO:0009986]; external side of plasma membrane [GO:0009897]; extracellular space [GO:0005615]; integral component of membrane [GO:0016021]; integrin alphaM-beta2 complex [GO:0034688]; nucleus [GO:0005634]; plasma membrane [GO:0005886]; plasma membrane raft [GO:0044853]	GO:0001774; GO:0001781; GO:0001846; GO:0001851; GO:0002523; GO:0005615; GO:0005634; GO:0005886; GO:0006898; GO:0006909; GO:0006911; GO:0007155; GO:0007159; GO:0007229; GO:0008201; GO:0009897; GO:0009986; GO:0014005; GO:0016021; GO:0030593; GO:0030900; GO:0031072; GO:0032930; GO:0034688; GO:0038024; GO:0043315; GO:0043395; GO:0044853; GO:0044877; GO:0045123; GO:0045963; GO:0046872; GO:0050798; GO:…	R-MMU-166016;R-MMU-202733;R-MMU-216083;R-MMU-6798695;		12.6006	12.8577	12.6526	12.6266	12.5726	11.7009	11.9531	12.0894	12.2368	12.1445
Ctsb_P10605	0.133371	0.943463	0.885703	0.841074	1.52338	-1.21359	-0.706425	-1.01845	-1.08571	-0.302817	Ctsb	Cathepsin B;Cathepsin B light chain;Cathepsin B heavy chain	P10605	1.0208	6.74745e-05	0.019115	0.387477	sp|P10605|CATB_MOUSE Cathepsin B OS=Mus musculus OX=10090 GN=Ctsb PE=1 SV=2	FUNCTION: Thiol protease which is believed to participate in intracellular degradation and turnover of proteins (By similarity). Cleaves matrix extracellular phosphoglycoprotein MEPE (By similarity). Involved in the solubilization of cross-linked TG/thyroglobulin in the thyroid follicle lumen (PubMed:12782676). Has also been implicated in tumor invasion and metastasis (By similarity). {ECO:000025…	SUBCELLULAR LOCATION: Lysosome {ECO:0000269|PubMed:12782676}. Melanosome {ECO:0000250|UniProtKB:P07858}. Secreted, extracellular space {ECO:0000269|PubMed:12782676}. Apical cell membrane {ECO:0000269|PubMed:12782676}; Peripheral membrane protein {ECO:0000269|PubMed:12782676}; Extracellular side {ECO:0000269|PubMed:12782676}. Note=Localizes to the lumen of thyroid follicles and to the apical membr…		collagen catabolic process [GO:0030574]; decidualization [GO:0046697]; negative regulation of cell death [GO:0060548]; proteolysis [GO:0006508]; proteolysis involved in cellular protein catabolic process [GO:0051603]; regulation of catalytic activity [GO:0050790]; thyroid hormone generation [GO:0006590]; viral entry into host cell [GO:0046718]	collagen binding [GO:0005518]; cysteine-type endopeptidase activity [GO:0004197]; cysteine-type peptidase activity [GO:0008234]; endopeptidase activity [GO:0004175]; kininogen binding [GO:0030984]; peptidase activity [GO:0008233]; peptide binding [GO:0042277]; protein-containing complex binding [GO:0044877]; protein self-association [GO:0043621]; proteoglycan binding [GO:0043394]	apical plasma membrane [GO:0016324]; cell surface [GO:0009986]; collagen-containing extracellular matrix [GO:0062023]; cytoplasm [GO:0005737]; external side of plasma membrane [GO:0009897]; extracellular region [GO:0005576]; extracellular space [GO:0005615]; intracellular membrane-bounded organelle [GO:0043231]; lysosome [GO:0005764]; melanosome [GO:0042470]; mitochondrion [GO:0005739]; nucleolus…	GO:0004175; GO:0004197; GO:0005518; GO:0005576; GO:0005615; GO:0005730; GO:0005737; GO:0005739; GO:0005764; GO:0006508; GO:0006590; GO:0008233; GO:0008234; GO:0009897; GO:0009986; GO:0016324; GO:0030574; GO:0030984; GO:0042277; GO:0042383; GO:0042470; GO:0043231; GO:0043394; GO:0043621; GO:0044877; GO:0046697; GO:0046718; GO:0048471; GO:0050790; GO:0051603; GO:0060548; GO:0062023	R-MMU-1442490;R-MMU-1679131;R-MMU-2022090;R-MMU-2132295;R-MMU-6798695;	mmu:13030;	18.8494	19.0307	19.0178	19.0078	19.1606	18.5478	18.6614	18.5915	18.5765	18.7517
Gm12695_A2AGB2	-0.716295	-1.19453	-0.867346	-1.05369	-0.406513	0.577985	1.33115	-0.0587619	1.00494	1.38305	Gm12695	Uncharacterized protein C1orf87 homolog	A2AGB2	1.0791	6.9983e-05	0.019115	-0.897346	sp|A2AGB2|CA087_MOUSE Uncharacterized protein C1orf87 homolog OS=Mus musculus OX=10090 GN=Gm12695 PE=4 SV=1									mmu:620779;	11.4134	11.1603	11.3335	11.2348	11.5774	12.0985	12.4971	11.7615	12.3245	12.5246
Cr1l_Q64735	0.218154	0.908997	1.18844	1.11656	0.872435	-1.50735	-1.19387	-0.810539	-0.532823	-0.259992	Cr1l	Complement component receptor 1-like protein	Q64735	1.02517	9.26299e-05	0.019115	0.364302	sp|Q64735|CR1L_MOUSE Complement component receptor 1-like protein OS=Mus musculus OX=10090 GN=Cr1l PE=1 SV=1	FUNCTION: Acts as a cofactor for complement factor I, a serine protease which protects autologous cells against complement-mediated injury by cleaving C3b and C4b deposited on host tissue. Also acts as a decay-accelerating factor, preventing the formation of C4b2a and C3bBb, the amplification convertases of the complement cascade. Plays a crucial role in early embryonic development by maintaining…	SUBCELLULAR LOCATION: Membrane; Single-pass type I membrane protein.		cellular response to hypoxia [GO:0071456]; complement activation [GO:0006956]; complement activation, classical pathway [GO:0006958]; female pregnancy [GO:0007565]; innate immune response [GO:0045087]; in utero embryonic development [GO:0001701]; negative regulation of complement activation [GO:0045916]; regulation of complement activation [GO:0030449]; regulation of complement-dependent cytotoxi…		basolateral plasma membrane [GO:0016323]; cell surface [GO:0009986]; external side of plasma membrane [GO:0009897]; integral component of membrane [GO:0016021]; receptor complex [GO:0043235]	GO:0001701; GO:0006956; GO:0006958; GO:0007565; GO:0009897; GO:0009986; GO:0016021; GO:0016323; GO:0030449; GO:0043235; GO:0045087; GO:0045916; GO:0071456; GO:1903659		mmu:12946;	14.7032	14.8493	14.9085	14.8933	14.8416	14.3381	14.4044	14.4855	14.5443	14.602
Fubp1_Q91WJ8	0.613165	1.28482	1.23766	0.925878	0.460363	-1.3331	-0.89909	-0.789221	-0.888398	-0.612076	Fubp1	Far upstream element-binding protein 1	Q91WJ8	1.01349	9.27548e-05	0.019115	0.222142	sp|Q91WJ8|FUBP1_MOUSE Far upstream element-binding protein 1 OS=Mus musculus OX=10090 GN=Fubp1 PE=1 SV=1	FUNCTION: Regulates MYC expression by binding to a single-stranded far-upstream element (FUSE) upstream of the MYC promoter. May act both as activator and repressor of transcription (By similarity). {ECO:0000250}.	SUBCELLULAR LOCATION: Nucleus {ECO:0000305}.		developmental cell growth [GO:0048588]; hematopoietic stem cell proliferation [GO:0071425]; positive regulation of gene expression [GO:0010628]; positive regulation of Schwann cell migration [GO:1900149]; regulation of gene expression [GO:0010468]; regulation of transcription by RNA polymerase II [GO:0006357]; somatic stem cell division [GO:0048103]	mRNA binding [GO:0003729]; RNA polymerase II cis-regulatory region sequence-specific DNA binding [GO:0000978]	cytoplasm [GO:0005737]; nucleoplasm [GO:0005654]; nucleus [GO:0005634]; synapse [GO:0045202]	GO:0000978; GO:0003729; GO:0005634; GO:0005654; GO:0005737; GO:0006357; GO:0010468; GO:0010628; GO:0045202; GO:0048103; GO:0048588; GO:0071425; GO:1900149			16.6551	16.7376	16.7318	16.6935	16.6363	16.416	16.4693	16.4828	16.4707	16.5046
Pcolce_Q61398	0.178115	0.749298	0.790443	1.78406	0.734043	-1.45802	-0.642555	-0.743734	-0.687653	-0.704007	Pcolce	Procollagen C-endopeptidase enhancer 1	Q61398	1.041	9.36538e-05	0.019115	0.559966	sp|Q61398|PCOC1_MOUSE Procollagen C-endopeptidase enhancer 1 OS=Mus musculus OX=10090 GN=Pcolce PE=1 SV=2	FUNCTION: Binds to the C-terminal propeptide of type I procollagen and enhances procollagen C-proteinase activity.	SUBCELLULAR LOCATION: Secreted.		cellular response to leukemia inhibitory factor [GO:1990830]; proteolysis [GO:0006508]	collagen binding [GO:0005518]; heparin binding [GO:0008201]; peptidase activator activity [GO:0016504]	extracellular space [GO:0005615]	GO:0005518; GO:0005615; GO:0006508; GO:0008201; GO:0016504; GO:1990830	R-MMU-1650814;R-MMU-2243919;	mmu:18542;	13.9979	14.1867	14.2003	14.5286	14.1816	13.4572	13.7267	13.6932	13.7118	13.7064
Raly_Q64012	-0.115597	0.755963	1.5412	1.11309	0.968839	-1.19123	-0.921419	-0.731421	-0.870725	-0.548703	Raly	RNA-binding protein Raly	Q64012	1.02922	9.56646e-05	0.019115	0.440562	sp|Q64012|RALY_MOUSE RNA-binding protein Raly OS=Mus musculus OX=10090 GN=Raly PE=1 SV=3	FUNCTION: RNA-binding protein that acts as a transcriptional cofactor for cholesterol biosynthetic genes in the liver (PubMed:27251289). Binds the lipid-responsive non-coding RNA LeXis and is required for LeXis-mediated effect on cholesterogenesis (PubMed:27251289). May be a heterogeneous nuclear ribonucleoprotein (hnRNP) (By similarity). {ECO:0000250|UniProtKB:Q9UKM9, ECO:0000269|PubMed:27251289…	SUBCELLULAR LOCATION: Nucleus {ECO:0000269|PubMed:27251289}.	DISEASE: Note=Defects in Raly are the cause of lethal yellow mutation (A(y)), a dominant allele that cause embryonic lethality when homozygous, and pleiotropic effects when heterozygous, including yellow pelage, obesity, non-insulin dependent diabetes and increased tumor susceptibility. A(y) is due to a 170 kb deletion that removes all but the promoter and non-coding first exon of Raly and links …	cholesterol homeostasis [GO:0042632]; mRNA processing [GO:0006397]; regulation of nucleic acid-templated transcription [GO:1903506]; RNA splicing [GO:0008380]	RNA binding [GO:0003723]; transcription coregulator activity [GO:0003712]	catalytic step 2 spliceosome [GO:0071013]; nucleus [GO:0005634]	GO:0003712; GO:0003723; GO:0005634; GO:0006397; GO:0008380; GO:0042632; GO:0071013; GO:1903506		mmu:19383;	15.2667	15.4919	15.6947	15.5841	15.5469	14.9889	15.0586	15.1076	15.0717	15.1549
Gns_Q8BFR4	0.392302	0.503536	1.63558	0.956472	0.746196	-0.865807	-1.03554	-1.23301	-0.0504627	-1.04926	Gns	N-acetylglucosamine-6-sulfatase	Q8BFR4	1.04344	9.5829e-05	0.019115	0.555699	sp|Q8BFR4|GNS_MOUSE N-acetylglucosamine-6-sulfatase OS=Mus musculus OX=10090 GN=Gns PE=1 SV=1		SUBCELLULAR LOCATION: Lysosome {ECO:0000250}.		glycosaminoglycan metabolic process [GO:0030203]	glycosaminoglycan binding [GO:0005539]; metal ion binding [GO:0046872]; N-acetylglucosamine-6-sulfatase activity [GO:0008449]; sulfate binding [GO:0043199]; sulfuric ester hydrolase activity [GO:0008484]	lysosome [GO:0005764]	GO:0005539; GO:0005764; GO:0008449; GO:0008484; GO:0030203; GO:0043199; GO:0046872	R-MMU-2022857;R-MMU-432720;R-MMU-6798695;	mmu:75612;	13.1999	13.2364	13.6078	13.385	13.316	12.7871	12.7314	12.6666	13.0546	12.7269
Zc2hc1a_Q8BJH1	0.0258209	0.761563	0.99033	0.8594	1.61677	-0.93415	-1.2961	-0.687407	-0.958204	-0.378016	Zc2hc1a	Zinc finger C2HC domain-containing protein 1A	Q8BJH1	1.03304	9.81013e-05	0.019115	0.460389	sp|Q8BJH1|ZC21A_MOUSE Zinc finger C2HC domain-containing protein 1A OS=Mus musculus OX=10090 GN=Zc2hc1a PE=1 SV=1					metal ion binding [GO:0046872]		GO:0046872		mmu:67306;	14.1708	14.3699	14.4318	14.3964	14.6013	13.9111	13.8131	13.9778	13.9046	14.0615
Sypl1_O09117	0.424801	0.846848	0.536974	1.27004	1.23279	-1.16358	-1.23432	-1.26052	-0.355537	-0.297493	Sypl1	Synaptophysin-like protein 1	O09117	1.02253	0.000111611	0.0207119	0.326084	sp|O09117|SYPL1_MOUSE Synaptophysin-like protein 1 OS=Mus musculus OX=10090 GN=Sypl1 PE=1 SV=2		SUBCELLULAR LOCATION: Cytoplasmic vesicle membrane {ECO:0000269|PubMed:8707851}; Multi-pass membrane protein {ECO:0000269|PubMed:8707851}. Melanosome {ECO:0000250}. Note=Cytoplasmic transport vesicles.			syntaxin-1 binding [GO:0017075]	integral component of synaptic vesicle membrane [GO:0030285]; melanosome [GO:0042470]; membrane [GO:0016020]; secretory granule [GO:0030141]; synaptic vesicle membrane [GO:0030672]	GO:0016020; GO:0017075; GO:0030141; GO:0030285; GO:0030672; GO:0042470		mmu:19027;	14.7165	14.7963	14.7377	14.8764	14.8693	14.4162	14.4028	14.3979	14.569	14.58
Etf1_Q8BWY3	0.439436	1.67366	0.570442	0.442821	1.25579	-0.838276	-0.770142	-0.927964	-0.769785	-1.07598	Etf1	Eukaryotic peptide chain release factor subunit 1	Q8BWY3	1.01676	0.000117952	0.0208936	0.265633	sp|Q8BWY3|ERF1_MOUSE Eukaryotic peptide chain release factor subunit 1 OS=Mus musculus OX=10090 GN=Etf1 PE=1 SV=4	FUNCTION: Directs the termination of nascent peptide synthesis (translation) in response to the termination codons UAA, UAG and UGA (By similarity). Component of the transient SURF complex which recruits UPF1 to stalled ribosomes in the context of nonsense-mediated decay (NMD) of mRNAs containing premature stop codons (By similarity). {ECO:0000250|UniProtKB:P62495}.	SUBCELLULAR LOCATION: Cytoplasm {ECO:0000250|UniProtKB:P62495}.		cytoplasmic translational termination [GO:0002184]; nuclear-transcribed mRNA catabolic process, nonsense-mediated decay [GO:0000184]; protein methylation [GO:0006479]; regulation of translational termination [GO:0006449]; translational termination [GO:0006415]; viral process [GO:0016032]	sequence-specific mRNA binding [GO:1990825]; translation release factor activity [GO:0003747]; translation release factor activity, codon specific [GO:0016149]; translation termination factor activity [GO:0008079]	cytoplasm [GO:0005737]; cytosol [GO:0005829]; translation release factor complex [GO:0018444]	GO:0000184; GO:0002184; GO:0003747; GO:0005737; GO:0005829; GO:0006415; GO:0006449; GO:0006479; GO:0008079; GO:0016032; GO:0016149; GO:0018444; GO:1990825	R-MMU-72764;R-MMU-975956;R-MMU-975957;	mmu:225363;	16.0461	16.2332	16.066	16.0466	16.1698	15.8525	15.8628	15.8389	15.8629	15.8165
Mrpl40_Q9Z2Q5	-0.416556	1.07071	1.19097	1.14693	1.18033	-0.896766	-0.957972	-0.772177	-0.915243	-0.63023	Mrpl40	39S ribosomal protein L40, mitochondrial	Q9Z2Q5	1.05215	0.00013256	0.0218648	0.780358	sp|Q9Z2Q5|RM40_MOUSE 39S ribosomal protein L40, mitochondrial OS=Mus musculus OX=10090 GN=Mrpl40 PE=1 SV=2		SUBCELLULAR LOCATION: Mitochondrion {ECO:0000250|UniProtKB:Q9NQ50}.				mitochondrial large ribosomal subunit [GO:0005762]; mitochondrial ribosome [GO:0005761]; mitochondrion [GO:0005739]; nucleolus [GO:0005730]	GO:0005730; GO:0005739; GO:0005761; GO:0005762	R-MMU-5389840;R-MMU-5419276;	mmu:18100;	15.1597	15.8551	15.9113	15.8907	15.9063	14.9351	14.9065	14.9934	14.9265	15.0598
Eral1_Q9CZU4	0.735744	0.718155	0.609171	0.713965	1.41806	-1.5227	-1.47649	-0.175633	-0.485482	-0.534789	Eral1	GTPase Era, mitochondrial	Q9CZU4	1.04549	0.000134656	0.0218648	0.547862	sp|Q9CZU4|ERAL1_MOUSE GTPase Era, mitochondrial OS=Mus musculus OX=10090 GN=Eral1 PE=2 SV=1	FUNCTION: Probable GTPase that plays a role in the mitochondrial ribosomal small subunit assembly. Specifically binds the 12S mitochondrial rRNA (12S mt-rRNA) to a 33 nucleotide section delineating the 3' terminal stem-loop region. May act as a chaperone that protects the 12S mt-rRNA on the 28S mitoribosomal subunit during ribosomal small subunit assembly (By similarity). {ECO:0000250|UniProtKB:O…	SUBCELLULAR LOCATION: Mitochondrion matrix {ECO:0000250}. Mitochondrion inner membrane {ECO:0000250}; Peripheral membrane protein {ECO:0000250}. Note=Localizes on the matrix side on the mitochondrial inner membrane. {ECO:0000250}.		ribosomal small subunit assembly [GO:0000028]	GTP binding [GO:0005525]; ribosomal small subunit binding [GO:0043024]; rRNA binding [GO:0019843]	cytosol [GO:0005829]; mitochondrial inner membrane [GO:0005743]; mitochondrial matrix [GO:0005759]; mitochondrion [GO:0005739]	GO:0000028; GO:0005525; GO:0005739; GO:0005743; GO:0005759; GO:0005829; GO:0019843; GO:0043024	R-MMU-5389840;R-MMU-5419276;	mmu:57837;	12.5564	12.5507	12.5151	12.5493	12.7792	11.8191	11.8342	12.2589	12.1577	12.1416
Cdkal1_Q91WE6	0.191087	0.980638	0.72802	1.09647	1.21757	-0.692572	-1.0135	-0.210982	-0.601461	-1.69528	Cdkal1	Threonylcarbamoyladenosine tRNA methylthiotransferase	Q91WE6	1.03388	0.00014713	0.0229346	0.432462	sp|Q91WE6|CDKAL_MOUSE Threonylcarbamoyladenosine tRNA methylthiotransferase OS=Mus musculus OX=10090 GN=Cdkal1 PE=2 SV=1	FUNCTION: Catalyzes the methylthiolation of N6-threonylcarbamoyladenosine (t(6)A), leading to the formation of 2-methylthio-N6-threonylcarbamoyladenosine (ms(2)t(6)A) at position 37 in tRNAs that read codons beginning with adenine. {ECO:0000269|PubMed:20584901}.	SUBCELLULAR LOCATION: Endoplasmic reticulum membrane {ECO:0000250|UniProtKB:Q5VV42}; Single-pass membrane protein {ECO:0000255}. Note=Is a tail-anchored protein that exploits the TCR40 assisted pathway for insertion into the endoplasmic reticulum. {ECO:0000250|UniProtKB:Q5VV42}.		maintenance of translational fidelity [GO:1990145]; tRNA methylthiolation [GO:0035600]	4 iron, 4 sulfur cluster binding [GO:0051539]; metal ion binding [GO:0046872]; methylthiotransferase activity [GO:0035596]; N6-threonylcarbomyladenosine methylthiotransferase activity [GO:0035598]; tRNA (N(6)-L-threonylcarbamoyladenosine(37)-C(2))-methylthiotransferase [GO:0061712]	endoplasmic reticulum [GO:0005783]; endoplasmic reticulum membrane [GO:0005789]; integral component of membrane [GO:0016021]; rough endoplasmic reticulum [GO:0005791]	GO:0005783; GO:0005789; GO:0005791; GO:0016021; GO:0035596; GO:0035598; GO:0035600; GO:0046872; GO:0051539; GO:0061712; GO:1990145		mmu:68916;	13.0305	13.2331	13.1683	13.2628	13.2939	12.8038	12.7215	12.9274	12.8272	12.5465
Arrb1_Q8BWG8	0.417622	1.01815	0.943152	1.51961	0.510728	-0.92987	-1.09817	-0.321704	-0.898513	-1.16101	Arrb1	Beta-arrestin-1	Q8BWG8	1.0174	0.000156179	0.0229454	0.234841	sp|Q8BWG8|ARRB1_MOUSE Beta-arrestin-1 OS=Mus musculus OX=10090 GN=Arrb1 PE=1 SV=1	FUNCTION: Functions in regulating agonist-mediated G-protein coupled receptor (GPCR) signaling by mediating both receptor desensitization and resensitization processes. During homologous desensitization, beta-arrestins bind to the GPRK-phosphorylated receptor and sterically preclude its coupling to the cognate G-protein; the binding appears to require additional receptor determinants exposed only…	SUBCELLULAR LOCATION: Cytoplasm {ECO:0000250}. Nucleus {ECO:0000250}. Cell membrane {ECO:0000250}. Membrane, clathrin-coated pit {ECO:0000305}. Cell projection, pseudopodium {ECO:0000250}. Cytoplasmic vesicle {ECO:0000250}. Note=Translocates to the plasma membrane and colocalizes with antagonist-stimulated GPCRs. The monomeric form is predominantly located in the nucleus. The oligomeric form is l…		activation of MAPK activity [GO:0000187]; endocytosis [GO:0006897]; follicle-stimulating hormone signaling pathway [GO:0042699]; G protein-coupled receptor internalization [GO:0002031]; G protein-coupled receptor signaling pathway [GO:0007186]; negative regulation of apoptotic process [GO:0043066]; negative regulation of cysteine-type endopeptidase activity involved in apoptotic process [GO:00431…	alpha-1A adrenergic receptor binding [GO:0031691]; alpha-1B adrenergic receptor binding [GO:0031692]; angiotensin receptor binding [GO:0031701]; AP-2 adaptor complex binding [GO:0035612]; arrestin family protein binding [GO:1990763]; clathrin adaptor activity [GO:0035615]; clathrin binding [GO:0030276]; cysteine-type endopeptidase inhibitor activity involved in apoptotic process [GO:0043027]; enz…	basolateral plasma membrane [GO:0016323]; chromatin [GO:0000785]; clathrin-coated pit [GO:0005905]; cytoplasm [GO:0005737]; cytoplasmic vesicle [GO:0031410]; cytosol [GO:0005829]; dendritic spine [GO:0043197]; endosome [GO:0005768]; nuclear body [GO:0016604]; nucleoplasm [GO:0005654]; nucleus [GO:0005634]; plasma membrane [GO:0005886]; postsynaptic density [GO:0014069]; postsynaptic membrane [GO:…	GO:0000187; GO:0000785; GO:0001664; GO:0001933; GO:0001934; GO:0002031; GO:0002092; GO:0003713; GO:0005096; GO:0005102; GO:0005159; GO:0005634; GO:0005654; GO:0005737; GO:0005768; GO:0005829; GO:0005886; GO:0005905; GO:0006355; GO:0006357; GO:0006511; GO:0006897; GO:0007186; GO:0007602; GO:0008134; GO:0008277; GO:0008284; GO:0014069; GO:0015031; GO:0016323; GO:0016567; GO:0016604; GO:0019899; GO:…	R-MMU-418555;R-MMU-432720;R-MMU-432722;R-MMU-456926;R-MMU-5635838;R-MMU-5674135;R-MMU-5689880;R-MMU-8856825;R-MMU-8856828;	mmu:109689;	13.6686	13.7486	13.7386	13.8154	13.681	13.4892	13.4668	13.5702	13.4934	13.4585
Tomm40_Q9QYA2	0.0590826	0.844904	1.70328	0.997325	0.658379	-0.777996	-1.12765	-1.10225	-0.435247	-0.819827	Tomm40	Mitochondrial import receptor subunit TOM40 homolog	Q9QYA2	1.01966	0.000165138	0.0229454	0.322714	sp|Q9QYA2|TOM40_MOUSE Mitochondrial import receptor subunit TOM40 homolog OS=Mus musculus OX=10090 GN=Tomm40 PE=1 SV=3	FUNCTION: Channel-forming protein essential for import of protein precursors into mitochondria. Plays a role in the assembly of the mitochondrial membrane respiratory chain NADH dehydrogenase (Complex I) by forming a complex with BCAP31 and mediating the translocation of Complex I components from the cytosol to the mitochondria. {ECO:0000250|UniProtKB:O96008}.	SUBCELLULAR LOCATION: Mitochondrion outer membrane {ECO:0000250|UniProtKB:O96008}; Multi-pass membrane protein {ECO:0000255}. Note=Associates with the mitochondria-associated ER membrane via interaction with BCAP31. {ECO:0000250|UniProtKB:O96008}.		positive regulation of apoptotic process [GO:0043065]; protein import into mitochondrial matrix [GO:0030150]; protein insertion into mitochondrial membrane [GO:0051204]; protein targeting to mitochondrion [GO:0006626]	cation channel activity [GO:0005261]; porin activity [GO:0015288]; preprotein binding [GO:0070678]; protein transmembrane transporter activity [GO:0008320]	cytosol [GO:0005829]; integral component of membrane [GO:0016021]; integral component of mitochondrial membrane [GO:0032592]; integral component of mitochondrial outer membrane [GO:0031307]; mitochondria-associated endoplasmic reticulum membrane [GO:0044233]; mitochondrial inner membrane [GO:0005743]; mitochondrial outer membrane [GO:0005741]; mitochondrial outer membrane translocase complex [GO:…	GO:0005261; GO:0005739; GO:0005741; GO:0005742; GO:0005743; GO:0005829; GO:0006626; GO:0008320; GO:0015288; GO:0016021; GO:0030150; GO:0031307; GO:0032592; GO:0043065; GO:0044233; GO:0046930; GO:0051204; GO:0070678	R-MMU-5205685;	mmu:53333;	16.5862	16.7349	16.8974	16.7638	16.6996	16.4278	16.3616	16.3664	16.4927	16.4199
Ptpn6_P29351	0.499078	0.757394	0.777089	1.04867	1.04756	-0.595819	-0.17407	-0.90735	-1.98792	-0.464632	Ptpn6	Tyrosine-protein phosphatase non-receptor type 6	P29351	1.08396	0.000173521	0.0229454	1.00743	sp|P29351|PTN6_MOUSE Tyrosine-protein phosphatase non-receptor type 6 OS=Mus musculus OX=10090 GN=Ptpn6 PE=1 SV=2	FUNCTION: Modulates signaling by tyrosine phosphorylated cell surface receptors such as KIT and the EGF receptor/EGFR. The SH2 regions may interact with other cellular components to modulate its own phosphatase activity against interacting substrates. Together with MTUS1, induces UBE2V2 expression upon angiotensin II stimulation. Plays a key role in hematopoiesis. {ECO:0000269|PubMed:9528781}.	SUBCELLULAR LOCATION: Cytoplasm. Nucleus {ECO:0000250}. Note=In neurons, translocates into the nucleus after treatment with angiotensin II. Shuttles between the cytoplasm and nucleus via its association with PDPK1 (By similarity). {ECO:0000250}.	DISEASE: Note=Defects in Ptpn6 are the cause of the motheaten (me) or viable motheaten (mev) phenotypes. Mice homozygous for the recessive allelic mutations develop severe defects in hematopoiesis.	abortive mitotic cell cycle [GO:0033277]; B cell receptor signaling pathway [GO:0050853]; cell differentiation [GO:0030154]; cytokine-mediated signaling pathway [GO:0019221]; epididymis development [GO:1905867]; hematopoietic progenitor cell differentiation [GO:0002244]; intracellular signal transduction [GO:0035556]; megakaryocyte development [GO:0035855]; natural killer cell mediated cytotoxici…	cell adhesion molecule binding [GO:0050839]; natural killer cell lectin-like receptor binding [GO:0046703]; phosphorylation-dependent protein binding [GO:0140031]; phosphotyrosine residue binding [GO:0001784]; protein kinase binding [GO:0019901]; protein tyrosine phosphatase activity [GO:0004725]; SH2 domain binding [GO:0042169]; SH3 domain binding [GO:0017124]; transmembrane receptor protein tyr…	alpha-beta T cell receptor complex [GO:0042105]; cell-cell junction [GO:0005911]; cytoplasm [GO:0005737]; cytosol [GO:0005829]; nucleolus [GO:0005730]; nucleoplasm [GO:0005654]; nucleus [GO:0005634]; protein-containing complex [GO:0032991]	GO:0001784; GO:0002244; GO:0002924; GO:0004725; GO:0005001; GO:0005634; GO:0005654; GO:0005730; GO:0005737; GO:0005829; GO:0005911; GO:0006470; GO:0008284; GO:0014068; GO:0017124; GO:0018108; GO:0019221; GO:0019901; GO:0030154; GO:0030220; GO:0032715; GO:0032720; GO:0032991; GO:0033277; GO:0033630; GO:0035335; GO:0035556; GO:0035855; GO:0042105; GO:0042130; GO:0042169; GO:0042267; GO:0043407; GO:…	R-MMU-114604;R-MMU-1433559;R-MMU-210990;R-MMU-388841;R-MMU-389948;R-MMU-432142;R-MMU-512988;R-MMU-5690714;R-MMU-6798695;R-MMU-877300;R-MMU-909733;R-MMU-912526;R-MMU-912694;R-MMU-983695;	mmu:15170;	12.8063	12.9638	12.9758	13.1415	13.1408	12.1386	12.3958	11.9486	11.2896	12.2186
Tsta3_P23591	0.950735	0.624204	1.28521	1.03557	0.317559	-1.09619	-1.11135	-1.52448	-0.191356	-0.289902	Tsta3	GDP-L-fucose synthase	P23591	1.02744	0.000191787	0.0229454	0.360767	sp|P23591|FCL_MOUSE GDP-L-fucose synthase OS=Mus musculus OX=10090 GN=Tsta3 PE=1 SV=3	FUNCTION: Catalyzes the two-step NADP-dependent conversion of GDP-4-dehydro-6-deoxy-D-mannose to GDP-fucose, involving an epimerase and a reductase reaction. {ECO:0000250|UniProtKB:Q13630}.			'de novo' GDP-L-fucose biosynthetic process [GO:0042351]; GDP-mannose metabolic process [GO:0019673]; positive regulation of endothelial cell-matrix adhesion via fibronectin [GO:1904906]; positive regulation of endothelial cell migration [GO:0010595]; T cell mediated cytotoxicity [GO:0001913]	GDP-L-fucose synthase activity [GO:0050577]; GDP-mannose 3,5-epimerase activity [GO:0047918]; identical protein binding [GO:0042802]		GO:0001913; GO:0010595; GO:0019673; GO:0042351; GO:0042802; GO:0047918; GO:0050577; GO:1904906	R-MMU-6787639;	mmu:22122;	13.5323	13.4624	13.6039	13.5505	13.3968	13.0941	13.0909	13.0024	13.2878	13.2667
Mfap5_Q9QZJ6	0.346183	1.13599	0.432351	0.802245	1.47047	-0.833931	-1.45425	-0.0988231	-1.17977	-0.620462	Mfap5	Microfibrillar-associated protein 5	Q9QZJ6	1.02908	0.000192838	0.0229454	0.409348	sp|Q9QZJ6|MFAP5_MOUSE Microfibrillar-associated protein 5 OS=Mus musculus OX=10090 GN=Mfap5 PE=1 SV=1	FUNCTION: May play a role in hematopoiesis. In the cardiovascular system, could regulate growth factors or participate in cell signaling in maintaining large vessel integrity (PubMed:23963447). Component of the elastin-associated microfibrils (By similarity). {ECO:0000250|UniProtKB:Q13361, ECO:0000269|PubMed:23963447}.	SUBCELLULAR LOCATION: Secreted, extracellular space, extracellular matrix {ECO:0000250}.		definitive hemopoiesis [GO:0060216]; embryonic eye morphogenesis [GO:0048048]; supramolecular fiber organization [GO:0097435]	extracellular matrix constituent conferring elasticity [GO:0030023]	collagen-containing extracellular matrix [GO:0062023]; extracellular matrix [GO:0031012]; microfibril [GO:0001527]	GO:0001527; GO:0030023; GO:0031012; GO:0048048; GO:0060216; GO:0062023; GO:0097435	R-MMU-1566948;R-MMU-2129379;	mmu:50530;	14.3643	14.5573	14.3854	14.4758	14.6391	14.0759	13.9243	14.2556	13.9914	14.1281
Hpca_P84075	0.181869	0.59372	1.00949	1.59656	0.889634	-0.963911	-1.06748	-0.439477	-1.33172	-0.468675	Hpca	Neuron-specific calcium-binding protein hippocalcin;Hippocalcin-like protein 1;Neurocalcin-delta	P84075	1.02095	0.00019307	0.0229454	0.294092	sp|P84075|HPCA_MOUSE Neuron-specific calcium-binding protein hippocalcin OS=Mus musculus OX=10090 GN=Hpca PE=1 SV=2;sp|P62748|HPCL1_MOUSE Hippocalcin-like protein 1 OS=Mus musculus OX=10090 GN=Hpcal1 PE=1 SV=2;sp|Q91X97|NCALD_MOUSE Neurocalcin-delta OS=Mus	FUNCTION: Calcium-binding protein that may play a role in the regulation of voltage-dependent calcium channels. May also play a role in cyclic-nucleotide-mediated signaling through the regulation of adenylate and guanylate cyclases. {ECO:0000250|UniProtKB:P84074, ECO:0000250|UniProtKB:P84076}.	SUBCELLULAR LOCATION: Cytoplasm, cytosol {ECO:0000250|UniProtKB:P84074, ECO:0000250|UniProtKB:P84076}. Membrane {ECO:0000250|UniProtKB:P84076}; Peripheral membrane protein {ECO:0000250|UniProtKB:P84076}. Note=Association with membranes is calcium-dependent (By similarity). Enriched in the perinuclear region, probably at the trans Golgi network in response to calcium (By similarity). {ECO:0000250|…		activation of phospholipase D activity [GO:0031584]; brain development [GO:0007420]; calcium-mediated signaling [GO:0019722]; cellular response to calcium ion [GO:0071277]; cellular response to electrical stimulus [GO:0071257]; cellular response to monosodium glutamate [GO:1904009]; inner ear development [GO:0048839]; negative regulation of guanylate cyclase activity [GO:0031283]; positive regula…	actin binding [GO:0003779]; calcium ion binding [GO:0005509]; identical protein binding [GO:0042802]; kinase binding [GO:0019900]	axon [GO:0030424]; cytoplasm [GO:0005737]; cytosol [GO:0005829]; dendrite cytoplasm [GO:0032839]; dendrite membrane [GO:0032590]; dendritic spine head [GO:0044327]; extrinsic component of membrane [GO:0019898]; glutamatergic synapse [GO:0098978]; neuronal cell body membrane [GO:0032809]; perikaryon [GO:0043204]	GO:0003779; GO:0005509; GO:0005737; GO:0005829; GO:0007420; GO:0010518; GO:0019722; GO:0019898; GO:0019900; GO:0030424; GO:0031283; GO:0031584; GO:0032590; GO:0032809; GO:0032839; GO:0042802; GO:0043204; GO:0044327; GO:0045762; GO:0048839; GO:0060041; GO:0071257; GO:0071277; GO:0090314; GO:0098978; GO:0099149; GO:1901385; GO:1901986; GO:1902065; GO:1904009; GO:1904010		mmu:15444;	14.2135	14.2844	14.356	14.457	14.3354	14.0163	13.9985	14.1066	13.953	14.1015
Minos1_Q7TNS2	0.299367	1.17428	0.455088	0.623941	1.72255	-0.964086	-0.932498	-0.404057	-0.819803	-1.15478	Minos1	MICOS complex subunit Mic10	Q7TNS2	1.02055	0.00019844	0.0229454	0.287792	sp|Q7TNS2|MIC10_MOUSE MICOS complex subunit Mic10 OS=Mus musculus OX=10090 GN=Minos1 PE=1 SV=1	FUNCTION: Component of the MICOS complex, a large protein complex of the mitochondrial inner membrane that plays crucial roles in the maintenance of crista junctions, inner membrane architecture, and formation of contact sites to the outer membrane. {ECO:0000250|UniProtKB:Q5TGZ0}.	SUBCELLULAR LOCATION: Mitochondrion inner membrane {ECO:0000250|UniProtKB:Q5TGZ0}; Single-pass membrane protein {ECO:0000250|UniProtKB:Q5TGZ0}. Note=The C-terminus is located in the intermembrane space, while the location of the N-terminus has not been determined yet. As some programs predict the presence of 2 closely apposed membrane domains, it has been proposed that the protein may cross the m…				MICOS complex [GO:0061617]; mitochondrion [GO:0005739]	GO:0005739; GO:0061617		mmu:433771;	14.1977	14.345	14.224	14.2524	14.4373	13.9851	13.9904	14.0794	14.0094	13.953
Lamp1_P11438	0.474367	1.05464	1.078	1.03503	0.920702	-0.944882	-0.43596	-1.34797	-0.924349	-0.90958	Lamp1	Lysosome-associated membrane glycoprotein 1	P11438	1.01196	0.000201053	0.0229454	0.185773	sp|P11438|LAMP1_MOUSE Lysosome-associated membrane glycoprotein 1 OS=Mus musculus OX=10090 GN=Lamp1 PE=1 SV=2	FUNCTION: Presents carbohydrate ligands to selectins. Also implicated in tumor cell metastasis.	SUBCELLULAR LOCATION: Cell membrane {ECO:0000250|UniProtKB:P05300}; Single-pass type I membrane protein {ECO:0000250|UniProtKB:P11279}. Endosome membrane {ECO:0000250|UniProtKB:P11279}; Single-pass type I membrane protein {ECO:0000250|UniProtKB:P11279}. Lysosome membrane {ECO:0000250|UniProtKB:P11279}; Single-pass type I membrane protein {ECO:0000250|UniProtKB:P11279}. Late endosome {ECO:0000250|…		autophagic cell death [GO:0048102]; establishment of protein localization to organelle [GO:0072594]; Golgi to lysosome transport [GO:0090160]; granzyme-mediated programmed cell death signaling pathway [GO:0140507]; positive regulation of natural killer cell degranulation [GO:0043323]; positive regulation of natural killer cell mediated cytotoxicity [GO:0045954]; protein stabilization [GO:0050821]…	enzyme binding [GO:0019899]; protein domain specific binding [GO:0019904]	alveolar lamellar body [GO:0097208]; autolysosome [GO:0044754]; autophagosome membrane [GO:0000421]; cell surface [GO:0009986]; cytolytic granule [GO:0044194]; cytoplasm [GO:0005737]; cytoplasmic vesicle [GO:0031410]; cytosol [GO:0005829]; dendrite [GO:0030425]; endosome [GO:0005768]; endosome membrane [GO:0010008]; external side of plasma membrane [GO:0009897]; integral component of synaptic ves…	GO:0000421; GO:0005737; GO:0005764; GO:0005765; GO:0005768; GO:0005770; GO:0005771; GO:0005773; GO:0005829; GO:0005886; GO:0007283; GO:0008021; GO:0009897; GO:0009986; GO:0010008; GO:0019899; GO:0019904; GO:0030285; GO:0030425; GO:0031410; GO:0031902; GO:0031982; GO:0042383; GO:0042470; GO:0043025; GO:0043323; GO:0044194; GO:0044754; GO:0045335; GO:0045954; GO:0048102; GO:0048471; GO:0050821; GO:…	R-MMU-6798695;	mmu:16783;	15.6693	15.7284	15.7308	15.7264	15.7148	15.5249	15.5767	15.4838	15.527	15.5285
Pdgfrb_P05622	-0.479116	1.04886	1.23454	1.17747	1.12812	-0.600615	-1.02876	-0.89952	-0.858127	-0.722863	Pdgfrb	Platelet-derived growth factor receptor beta	P05622	1.07246	0.000201418	0.0229454	1.03625	sp|P05622|PGFRB_MOUSE Platelet-derived growth factor receptor beta OS=Mus musculus OX=10090 GN=Pdgfrb PE=1 SV=1	FUNCTION: Tyrosine-protein kinase that acts as cell-surface receptor for homodimeric PDGFB and PDGFD and for heterodimers formed by PDGFA and PDGFB, and plays an essential role in the regulation of embryonic development, cell proliferation, survival, differentiation, chemotaxis and migration. Plays an essential role in blood vessel development by promoting proliferation, migration and recruitment…	SUBCELLULAR LOCATION: Cell membrane; Single-pass type I membrane protein. Cytoplasmic vesicle {ECO:0000250}. Lysosome lumen {ECO:0000250}. Note=After ligand binding, the autophosphorylated receptor is ubiquitinated and internalized, leading to its degradation.		adrenal gland development [GO:0030325]; aging [GO:0007568]; aorta morphogenesis [GO:0035909]; blood vessel development [GO:0001568]; cardiac myofibril assembly [GO:0055003]; cardiac vascular smooth muscle cell differentiation [GO:0060947]; cell chemotaxis [GO:0060326]; cell migration [GO:0016477]; cell migration involved in coronary angiogenesis [GO:0060981]; cell migration involved in vasculogen…	ATP binding [GO:0005524]; enzyme binding [GO:0019899]; growth factor binding [GO:0019838]; kinase activity [GO:0016301]; phosphatidylinositol 3-kinase binding [GO:0043548]; platelet-derived growth factor-activated receptor activity [GO:0005017]; platelet-derived growth factor beta-receptor activity [GO:0005019]; platelet-derived growth factor binding [GO:0048407]; platelet-derived growth factor r…	apical plasma membrane [GO:0016324]; cell surface [GO:0009986]; cytoplasm [GO:0005737]; cytoplasmic vesicle [GO:0031410]; Golgi apparatus [GO:0005794]; integral component of plasma membrane [GO:0005887]; intracellular membrane-bounded organelle [GO:0043231]; intrinsic component of plasma membrane [GO:0031226]; lysosomal lumen [GO:0043202]; membrane [GO:0016020]; nucleus [GO:0005634]; plasma membr…	GO:0001568; GO:0001701; GO:0001726; GO:0001822; GO:0001894; GO:0004713; GO:0004714; GO:0005017; GO:0005019; GO:0005102; GO:0005161; GO:0005524; GO:0005634; GO:0005737; GO:0005794; GO:0005886; GO:0005887; GO:0006024; GO:0006807; GO:0007165; GO:0007169; GO:0007275; GO:0007568; GO:0008284; GO:0008584; GO:0009636; GO:0009986; GO:0010863; GO:0014068; GO:0014911; GO:0016020; GO:0016301; GO:0016324; GO:…	R-MMU-1257604;R-MMU-186763;R-MMU-186797;R-MMU-5673001;R-MMU-6811558;	mmu:18596;	14.5178	15.481	15.598	15.562	15.5309	14.4412	14.1713	14.2528	14.2789	14.3642
Acss1_Q99NB1	0.941476	0.68899	0.585346	0.628945	1.49667	-1.06998	-1.44102	-0.758103	-0.916705	-0.155627	Acss1	Acetyl-coenzyme A synthetase 2-like, mitochondrial	Q99NB1	1.01371	0.000215729	0.0229454	0.24232	sp|Q99NB1|ACS2L_MOUSE Acetyl-coenzyme A synthetase 2-like, mitochondrial OS=Mus musculus OX=10090 GN=Acss1 PE=1 SV=1	FUNCTION: Catalyzes the synthesis of acetyl-CoA from short-chain fatty acids (PubMed:11150295, PubMed:16790548). Acetate is the preferred substrate (PubMed:11150295, PubMed:16790548). Can also utilize propionate with a much lower affinity (PubMed:11150295). Provides acetyl-CoA that is utilized mainly for oxidation under ketogenic conditions (PubMed:11150295). Involved in thermogenesis under ketog…	SUBCELLULAR LOCATION: Mitochondrion matrix {ECO:0000269|PubMed:11150295}.		acetate biosynthetic process [GO:0019413]; acetyl-CoA biosynthetic process [GO:0006085]; acetyl-CoA biosynthetic process from acetate [GO:0019427]; propionate biosynthetic process [GO:0019542]	acetate-CoA ligase activity [GO:0003987]; AMP binding [GO:0016208]; ATP binding [GO:0005524]; propionate-CoA ligase activity [GO:0050218]	mitochondrial matrix [GO:0005759]; mitochondrion [GO:0005739]	GO:0003987; GO:0005524; GO:0005739; GO:0005759; GO:0006085; GO:0016208; GO:0019413; GO:0019427; GO:0019542; GO:0050218	R-MMU-71384;	mmu:68738;	17.921	17.8858	17.8713	17.8774	17.9985	17.6403	17.5885	17.6838	17.6617	17.7679
Fgb_Q8K0E8	0.556984	1.76084	1.28563	0.566101	-0.0335728	-1.13437	-0.89456	-0.614642	-0.611476	-0.880935	Fgb	Fibrinogen beta chain;Fibrinopeptide B;Fibrinogen beta chain	Q8K0E8	1.02998	0.000216049	0.0229454	0.536666	sp|Q8K0E8|FIBB_MOUSE Fibrinogen beta chain OS=Mus musculus OX=10090 GN=Fgb PE=1 SV=1	FUNCTION: Cleaved by the protease thrombin to yield monomers which, together with fibrinogen alpha (FGA) and fibrinogen gamma (FGG), polymerize to form an insoluble fibrin matrix. Fibrin has a major function in hemostasis as one of the primary components of blood clots. In addition, functions during the early stages of wound repair to stabilize the lesion and guide cell migration during re-epithe…	SUBCELLULAR LOCATION: Secreted {ECO:0000250|UniProtKB:P02675}.		adaptive immune response [GO:0002250]; blood coagulation, fibrin clot formation [GO:0072378]; cell adhesion [GO:0007155]; cell-matrix adhesion [GO:0007160]; cellular protein-containing complex assembly [GO:0034622]; cellular response to interleukin-1 [GO:0071347]; cellular response to leptin stimulus [GO:0044320]; fibrinolysis [GO:0042730]; induction of bacterial agglutination [GO:0043152]; innat…	cell adhesion molecule binding [GO:0050839]; chaperone binding [GO:0051087]; signaling receptor binding [GO:0005102]; structural molecule activity [GO:0005198]	blood microparticle [GO:0072562]; cell cortex [GO:0005938]; cell surface [GO:0009986]; collagen-containing extracellular matrix [GO:0062023]; cytoplasm [GO:0005737]; endoplasmic reticulum [GO:0005783]; external side of plasma membrane [GO:0009897]; extracellular space [GO:0005615]; fibrinogen complex [GO:0005577]; platelet alpha granule [GO:0031091]; synapse [GO:0045202]	GO:0002250; GO:0005102; GO:0005198; GO:0005577; GO:0005615; GO:0005737; GO:0005783; GO:0005938; GO:0007155; GO:0007160; GO:0009897; GO:0009986; GO:0031091; GO:0031639; GO:0034116; GO:0034622; GO:0042730; GO:0043152; GO:0044320; GO:0045087; GO:0045202; GO:0045907; GO:0045921; GO:0050714; GO:0050839; GO:0051087; GO:0051258; GO:0051592; GO:0062023; GO:0070374; GO:0070527; GO:0071347; GO:0072378; GO:…	R-MMU-114608;R-MMU-140875;R-MMU-216083;R-MMU-354192;R-MMU-354194;R-MMU-372708;R-MMU-5674135;R-MMU-5686938;	mmu:110135;	18.35	18.7405	18.5864	18.353	18.1584	17.8014	17.8791	17.9699	17.971	17.8836
Adrb3_P25962	0.761396	1.18259	1.30117	0.476171	0.548436	-1.24377	-0.418494	-0.723705	-1.56679	-0.317001	Adrb3	Beta-3 adrenergic receptor	P25962	1.02104	0.000220018	0.0229454	0.280516	sp|P25962|ADRB3_MOUSE Beta-3 adrenergic receptor OS=Mus musculus OX=10090 GN=Adrb3 PE=2 SV=2	FUNCTION: Beta-adrenergic receptors mediate the catecholamine-induced activation of adenylate cyclase through the action of G proteins. Beta-3 is involved in the regulation of lipolysis and thermogenesis.	SUBCELLULAR LOCATION: Cell membrane; Multi-pass membrane protein.		activation of adenylate cyclase activity [GO:0007190]; adenylate cyclase-activating adrenergic receptor signaling pathway [GO:0071880]; adenylate cyclase-activating G protein-coupled receptor signaling pathway [GO:0007189]; aging [GO:0007568]; brown fat cell differentiation [GO:0050873]; diet induced thermogenesis [GO:0002024]; eating behavior [GO:0042755]; heat generation [GO:0031649]; negative …	beta3-adrenergic receptor activity [GO:0015052]; beta-3 adrenergic receptor binding [GO:0031699]; beta-adrenergic receptor activity [GO:0004939]; epinephrine binding [GO:0051379]; G protein-coupled receptor activity [GO:0004930]; norepinephrine binding [GO:0051380]; protein homodimerization activity [GO:0042803]	integral component of plasma membrane [GO:0005887]; membrane [GO:0016020]; nucleus [GO:0005634]; receptor complex [GO:0043235]	GO:0002024; GO:0002025; GO:0004930; GO:0004939; GO:0005634; GO:0005887; GO:0007189; GO:0007190; GO:0007568; GO:0009409; GO:0015052; GO:0016020; GO:0031649; GO:0031699; GO:0040015; GO:0042755; GO:0042803; GO:0043235; GO:0043410; GO:0046677; GO:0050873; GO:0051379; GO:0051380; GO:0071880; GO:0120162	R-MMU-390696;R-MMU-418555;	mmu:11556;	13.6009	13.6701	13.6895	13.554	13.5659	13.2715	13.4071	13.357	13.2185	13.4237
Fabp5_Q05816	0.961347	1.0893	0.597458	0.959224	0.649901	-1.62502	-1.22872	0.0363994	-0.746149	-0.693742	Fabp5	Fatty acid-binding protein, epidermal	Q05816	1.01628	0.000223743	0.0229454	0.287969	sp|Q05816|FABP5_MOUSE Fatty acid-binding protein 5 OS=Mus musculus OX=10090 GN=Fabp5 PE=1 SV=3	FUNCTION: Intracellular carrier for long-chain fatty acids and related active lipids, such as the endocannabinoid, that regulates the metabolism and actions of the ligands they bind (PubMed:8608126, PubMed:12540600). In addition to the cytosolic transport, selectively delivers specific fatty acids from the cytosol to the nucleus, wherein they activate nuclear receptors (By similarity). Delivers r…	SUBCELLULAR LOCATION: Cytoplasm {ECO:0000269|PubMed:17512406, ECO:0000269|PubMed:29531087}. Nucleus {ECO:0000269|PubMed:17512406}. Cell junction, synapse {ECO:0000269|PubMed:29531087}. Cell junction, synapse, postsynaptic density {ECO:0000269|PubMed:29531087}. Secreted {ECO:0000269|PubMed:29531087}. Note=Localizes primarily to the cytoplasm. Upon certain ligand binding, a conformation change expo…		glucose homeostasis [GO:0042593]; glucose metabolic process [GO:0006006]; lipid metabolic process [GO:0006629]; lipid transport across blood-brain barrier [GO:1990379]; long-chain fatty acid transport [GO:0015909]; negative regulation of glucose transmembrane transport [GO:0010829]; phosphatidylcholine biosynthetic process [GO:0006656]; positive regulation of cold-induced thermogenesis [GO:012016…	fatty acid binding [GO:0005504]; identical protein binding [GO:0042802]; long-chain fatty acid transporter activity [GO:0005324]; retinoic acid binding [GO:0001972]	cytoplasm [GO:0005737]; extracellular space [GO:0005615]; nucleus [GO:0005634]; postsynaptic density [GO:0014069]; synapse [GO:0045202]	GO:0001972; GO:0005324; GO:0005504; GO:0005615; GO:0005634; GO:0005737; GO:0006006; GO:0006629; GO:0006656; GO:0010829; GO:0014069; GO:0015909; GO:0031392; GO:0035360; GO:0042593; GO:0042802; GO:0045202; GO:0051930; GO:0099178; GO:0120162; GO:1990379	R-MMU-163560;R-MMU-5362517;R-MMU-6798695;	mmu:16592;	17.9978	18.0194	17.9362	17.9974	17.9451	17.5604	17.6274	17.8414	17.709	17.7179
Serpinf1_P97298	0.388657	0.821834	1.21688	1.53184	0.357709	-0.936599	-1.31005	-1.03995	-0.594341	-0.435979	Serpinf1	Pigment epithelium-derived factor	P97298	1.01728	0.000235937	0.0233065	0.247026	sp|P97298|PEDF_MOUSE Pigment epithelium-derived factor OS=Mus musculus OX=10090 GN=Serpinf1 PE=1 SV=2	FUNCTION: Neurotrophic protein; induces extensive neuronal differentiation in retinoblastoma cells. Potent inhibitor of angiogenesis. As it does not undergo the S (stressed) to R (relaxed) conformational transition characteristic of active serpins, it exhibits no serine protease inhibitory activity. {ECO:0000269|PubMed:12632345}.	SUBCELLULAR LOCATION: Secreted. Melanosome {ECO:0000250}.		aging [GO:0007568]; cellular response to cobalt ion [GO:0071279]; cellular response to dexamethasone stimulus [GO:0071549]; cellular response to glucose stimulus [GO:0071333]; cellular response to retinoic acid [GO:0071300]; kidney development [GO:0001822]; negative regulation of angiogenesis [GO:0016525]; negative regulation of endopeptidase activity [GO:0010951]; negative regulation of endothel…	serine-type endopeptidase inhibitor activity [GO:0004867]	axon [GO:0030424]; axon hillock [GO:0043203]; basement membrane [GO:0005604]; extracellular region [GO:0005576]; extracellular space [GO:0005615]; melanosome [GO:0042470]; neuronal cell body [GO:0043025]; perinuclear region of cytoplasm [GO:0048471]	GO:0001822; GO:0004867; GO:0005576; GO:0005604; GO:0005615; GO:0007568; GO:0007614; GO:0010447; GO:0010596; GO:0010629; GO:0010951; GO:0010976; GO:0014070; GO:0016525; GO:0030424; GO:0042470; GO:0042698; GO:0043025; GO:0043203; GO:0046685; GO:0048471; GO:0050728; GO:0050769; GO:0060041; GO:0060770; GO:0071279; GO:0071300; GO:0071333; GO:0071549; GO:1901215; GO:1901652		mmu:20317;	14.4773	14.5393	14.5958	14.6409	14.4729	14.2877	14.2343	14.2729	14.3367	14.3593
Snx1_Q9WV80	0.158556	1.42418	1.2477	1.10344	0.266825	-1.19405	-0.672619	-0.404953	-1.27937	-0.649698	Snx1	Sorting nexin-1	Q9WV80	1.02041	0.000243505	0.0233065	0.330798	sp|Q9WV80|SNX1_MOUSE Sorting nexin-1 OS=Mus musculus OX=10090 GN=Snx1 PE=1 SV=1	FUNCTION: Involved in several stages of intracellular trafficking. Interacts with membranes containing phosphatidylinositol 3-phosphate (PtdIns(3P)) or phosphatidylinositol 3,5-bisphosphate (PtdIns(3,5)P2). Acts in part as component of the retromer membrane-deforming SNX-BAR subcomplex. The SNX-BAR retromer mediates retrograde transport of cargo proteins from endosomes to the trans-Golgi network …	SUBCELLULAR LOCATION: Endosome membrane {ECO:0000250|UniProtKB:Q13596}; Peripheral membrane protein; Cytoplasmic side. Golgi apparatus, trans-Golgi network membrane {ECO:0000305}; Peripheral membrane protein {ECO:0000305}; Cytoplasmic side {ECO:0000305}. Early endosome membrane; Peripheral membrane protein; Cytoplasmic side. Cell projection, lamellipodium {ECO:0000250|UniProtKB:Q13596}. Note=Enri…		early endosome to Golgi transport [GO:0034498]; intracellular protein transport [GO:0006886]; lamellipodium morphogenesis [GO:0072673]; negative regulation of transforming growth factor beta receptor signaling pathway [GO:0030512]; neuron projection development [GO:0031175]; positive regulation of protein catabolic process [GO:0045732]; receptor internalization [GO:0031623]; retrograde transport,…	epidermal growth factor receptor binding [GO:0005154]; identical protein binding [GO:0042802]; insulin receptor binding [GO:0005158]; leptin receptor binding [GO:1990460]; phosphatidylinositol binding [GO:0035091]; protein heterodimerization activity [GO:0046982]; protein homodimerization activity [GO:0042803]; transferrin receptor binding [GO:1990459]	cytoplasm [GO:0005737]; cytosol [GO:0005829]; dendritic spine [GO:0043197]; early endosome [GO:0005769]; early endosome membrane [GO:0031901]; endosome [GO:0005768]; endosome membrane [GO:0010008]; extrinsic component of postsynaptic endosome membrane [GO:0098999]; Golgi apparatus [GO:0005794]; intracellular membrane-bounded organelle [GO:0043231]; lamellipodium [GO:0030027]; lysosome [GO:0005764…	GO:0005154; GO:0005158; GO:0005737; GO:0005764; GO:0005768; GO:0005769; GO:0005794; GO:0005829; GO:0006886; GO:0010008; GO:0014069; GO:0016020; GO:0030027; GO:0030512; GO:0030904; GO:0030905; GO:0031175; GO:0031623; GO:0031901; GO:0031982; GO:0032991; GO:0034498; GO:0035091; GO:0042147; GO:0042802; GO:0042803; GO:0043197; GO:0043231; GO:0045732; GO:0046982; GO:0048471; GO:0072673; GO:0098793; GO:…		mmu:56440;	16.405	16.6542	16.6194	16.591	16.4263	16.1387	16.2414	16.2941	16.1219	16.2459
Ssr1_Q9CY50	0.379008	1.62631	0.631213	0.848693	0.825611	-1.18889	-0.729406	-1.01213	-0.196022	-1.18439	Ssr1	Translocon-associated protein subunit alpha	Q9CY50	1.01747	0.000245206	0.0233065	0.246995	sp|Q9CY50|SSRA_MOUSE Translocon-associated protein subunit alpha OS=Mus musculus OX=10090 GN=Ssr1 PE=1 SV=1	FUNCTION: TRAP proteins are part of a complex whose function is to bind calcium to the ER membrane and thereby regulate the retention of ER resident proteins. May be involved in the recycling of the translocation apparatus after completion of the translocation process or may function as a membrane-bound chaperone facilitating folding of translocated proteins.	SUBCELLULAR LOCATION: Endoplasmic reticulum membrane {ECO:0000250}; Single-pass type I membrane protein {ECO:0000250}.				endoplasmic reticulum [GO:0005783]; endoplasmic reticulum membrane [GO:0005789]; integral component of membrane [GO:0016021]	GO:0005783; GO:0005789; GO:0016021		mmu:107513;	14.3122	14.4909	14.3483	14.3795	14.3762	14.0876	14.1535	14.113	14.2299	14.0883
Rer1_Q9CQU3	0.09356	0.602806	1.45804	1.43913	0.747141	-1.14623	-0.729362	-0.846177	-0.794336	-0.824563	Rer1	Protein RER1	Q9CQU3	1.01472	0.000256238	0.0233303	0.231322	sp|Q9CQU3|RER1_MOUSE Protein RER1 OS=Mus musculus OX=10090 GN=Rer1 PE=1 SV=1	FUNCTION: Involved in the retrieval of endoplasmic reticulum membrane proteins from the early Golgi compartment. {ECO:0000250}.	SUBCELLULAR LOCATION: Golgi apparatus membrane {ECO:0000250}; Multi-pass membrane protein {ECO:0000250}.		neuromuscular junction development [GO:0007528]; positive regulation of protein localization to plasma membrane [GO:1903078]; protein retention in ER lumen [GO:0006621]; retrograde vesicle-mediated transport, Golgi to endoplasmic reticulum [GO:0006890]; skeletal muscle acetylcholine-gated channel clustering [GO:0071340]	acetylcholine receptor binding [GO:0033130]	cell surface [GO:0009986]; endoplasmic reticulum [GO:0005783]; endoplasmic reticulum-Golgi intermediate compartment [GO:0005793]; Golgi apparatus [GO:0005794]; integral component of Golgi membrane [GO:0030173]; plasma membrane [GO:0005886]	GO:0005783; GO:0005793; GO:0005794; GO:0005886; GO:0006621; GO:0006890; GO:0007528; GO:0009986; GO:0030173; GO:0033130; GO:0071340; GO:1903078		mmu:67830;	15.8453	15.9131	16.027	16.0245	15.9323	15.6801	15.7356	15.7201	15.727	15.7229
Nedd8_P29595	-0.512175	1.21156	1.00824	1.33033	1.03875	-0.892533	-1.01453	-0.754677	-0.770692	-0.644269	Nedd8	NEDD8	P29595	1.07127	0.000259144	0.0233303	1.01271	sp|P29595|NEDD8_MOUSE NEDD8 OS=Mus musculus OX=10090 GN=Nedd8 PE=1 SV=2	FUNCTION: Ubiquitin-like protein which plays an important role in cell cycle control and embryogenesis. Covalent attachment to its substrates requires prior activation by the E1 complex UBE1C-APPBP1 and linkage to the E2 enzyme UBE2M. Attachment of NEDD8 to cullins activates their associated E3 ubiquitin ligase activity, and thus promotes polyubiquitination and proteasomal degradation of cyclins …	SUBCELLULAR LOCATION: Nucleus {ECO:0000269|PubMed:12215427}. Note=Mainly nuclear.		modification-dependent protein catabolic process [GO:0019941]; protein localization [GO:0008104]; protein neddylation [GO:0045116]; regulation of proteolysis [GO:0030162]; regulation of transcription by RNA polymerase II [GO:0006357]; response to organic cyclic compound [GO:0014070]	protein tag [GO:0031386]; ubiquitin protein ligase binding [GO:0031625]	cytoplasm [GO:0005737]; cytosol [GO:0005829]; nucleoplasm [GO:0005654]; nucleus [GO:0005634]	GO:0005634; GO:0005654; GO:0005737; GO:0005829; GO:0006357; GO:0008104; GO:0014070; GO:0019941; GO:0030162; GO:0031386; GO:0031625; GO:0045116	R-MMU-2173789;R-MMU-5689603;R-MMU-8856825;R-MMU-8951664;R-MMU-917937;	mmu:18002;	14.3977	15.4682	15.3419	15.5419	15.3609	14.1615	14.0857	14.2471	14.2371	14.3156
Coro1a_O89053	0.20949	1.12463	0.895607	1.15883	0.771556	-0.807198	-0.356025	-0.601271	-0.511634	-1.88399	Coro1a	Coronin-1A	O89053	1.02301	0.000269344	0.0233303	0.368274	sp|O89053|COR1A_MOUSE Coronin-1A OS=Mus musculus OX=10090 GN=Coro1a PE=1 SV=5	FUNCTION: May be a crucial component of the cytoskeleton of highly motile cells, functioning both in the invagination of large pieces of plasma membrane, as well as in forming protrusions of the plasma membrane involved in cell locomotion. In mycobacteria-infected cells, its retention on the phagosomal membrane prevents fusion between phagosomes and lysosomes. {ECO:0000269|PubMed:10338208}.	SUBCELLULAR LOCATION: Cytoplasm, cytoskeleton {ECO:0000269|PubMed:10338208}. Cytoplasm, cell cortex {ECO:0000269|PubMed:10338208}. Cytoplasmic vesicle, phagosome membrane {ECO:0000269|PubMed:10338208}. Note=In non-infected macrophages, associated with the cortical microtubule network. In mycobacteria-infected macrophages, becomes progressively relocalized and retained around the mycobacterial pha…		actin cytoskeleton organization [GO:0030036]; actin filament organization [GO:0007015]; calcium ion transport [GO:0006816]; cell migration [GO:0016477]; cell-substrate adhesion [GO:0031589]; cellular response to interleukin-4 [GO:0071353]; early endosome to recycling endosome transport [GO:0061502]; homeostasis of number of cells within a tissue [GO:0048873]; leukocyte chemotaxis [GO:0030595]; na…	actin binding [GO:0003779]; actin filament binding [GO:0051015]; actin monomer binding [GO:0003785]; cytoskeletal protein binding [GO:0008092]; identical protein binding [GO:0042802]; myosin heavy chain binding [GO:0032036]; phosphatidylinositol 3-kinase binding [GO:0043548]; protein C-terminus binding [GO:0008022]; protein homodimerization activity [GO:0042803]	actin cytoskeleton [GO:0015629]; actin filament [GO:0005884]; axon [GO:0030424]; cell-cell junction [GO:0005911]; cell leading edge [GO:0031252]; cortical actin cytoskeleton [GO:0030864]; cytoplasm [GO:0005737]; cytosol [GO:0005829]; early endosome [GO:0005769]; glutamatergic synapse [GO:0098978]; immunological synapse [GO:0001772]; lamellipodium [GO:0030027]; phagocytic cup [GO:0001891]; phagocy…	GO:0001772; GO:0001845; GO:0001891; GO:0003779; GO:0003785; GO:0005737; GO:0005769; GO:0005829; GO:0005884; GO:0005886; GO:0005911; GO:0006816; GO:0006909; GO:0007015; GO:0008022; GO:0008064; GO:0008092; GO:0008360; GO:0015629; GO:0016477; GO:0030027; GO:0030036; GO:0030335; GO:0030424; GO:0030595; GO:0030670; GO:0030833; GO:0030864; GO:0031252; GO:0031339; GO:0031589; GO:0032036; GO:0032426; GO:…		mmu:12721;	16.2369	16.4395	16.3888	16.447	16.3613	16.0119	16.1118	16.0575	16.0773	15.7736
Rpa2_Q62193	0.257809	0.697137	1.4761	1.54663	0.117899	-1.38034	-0.550618	-0.884288	-0.802291	-0.478043	Rpa2	Replication protein A 32 kDa subunit	Q62193	1.05418	0.000269906	0.0233303	0.59937	sp|Q62193|RFA2_MOUSE Replication protein A 32 kDa subunit OS=Mus musculus OX=10090 GN=Rpa2 PE=1 SV=1	FUNCTION: As part of the heterotrimeric replication protein A complex (RPA/RP-A), binds and stabilizes single-stranded DNA intermediates, that form during DNA replication or upon DNA stress. It prevents their reannealing and in parallel, recruits and activates different proteins and complexes involved in DNA metabolism. Thereby, it plays an essential role both in DNA replication and the cellular …	SUBCELLULAR LOCATION: Nucleus {ECO:0000250|UniProtKB:P15927}. Nucleus, PML body {ECO:0000250|UniProtKB:P15927}. Note=Redistributes to discrete nuclear foci upon DNA damage in an ATR-dependent manner. {ECO:0000250|UniProtKB:P15927, ECO:0000269|PubMed:17141802}.		base-excision repair [GO:0006284]; DNA repair [GO:0006281]; DNA replication [GO:0006260]; double-strand break repair via homologous recombination [GO:0000724]; mismatch repair [GO:0006298]; mitotic G1 DNA damage checkpoint [GO:0031571]; nucleotide-excision repair [GO:0006289]; protein localization to chromosome [GO:0034502]; regulation of DNA damage checkpoint [GO:2000001]; regulation of double-s…	damaged DNA binding [GO:0003684]; DNA binding [GO:0003677]; enzyme binding [GO:0019899]; G-rich strand telomeric DNA binding [GO:0098505]; protein N-terminus binding [GO:0047485]; protein phosphatase binding [GO:0019903]; single-stranded DNA binding [GO:0003697]; ubiquitin protein ligase binding [GO:0031625]	chromatin [GO:0000785]; chromosome, telomeric region [GO:0000781]; DNA replication factor A complex [GO:0005662]; nuclear body [GO:0016604]; nucleoplasm [GO:0005654]; nucleus [GO:0005634]; PML body [GO:0016605]; site of double-strand break [GO:0035861]	GO:0000723; GO:0000724; GO:0000781; GO:0000785; GO:0003677; GO:0003684; GO:0003697; GO:0005634; GO:0005654; GO:0005662; GO:0006260; GO:0006281; GO:0006284; GO:0006289; GO:0006298; GO:0010569; GO:0016604; GO:0016605; GO:0019899; GO:0019903; GO:0031571; GO:0031625; GO:0034502; GO:0035861; GO:0047485; GO:0098505; GO:2000001	R-MMU-110312;R-MMU-110314;R-MMU-110320;R-MMU-174437;R-MMU-176187;R-MMU-3371453;R-MMU-5358565;R-MMU-5358606;R-MMU-5651801;R-MMU-5655862;R-MMU-5656121;R-MMU-5656169;R-MMU-5685938;R-MMU-5685942;R-MMU-5693607;R-MMU-5693616;R-MMU-5696395;R-MMU-5696397;R-MMU-5696400;R-MMU-6782135;R-MMU-6782210;R-MMU-6783310;R-MMU-6804756;R-MMU-68962;R-MMU-69166;R-MMU-69473;		11.4573	11.618	11.903	11.9288	11.4061	10.8579	11.1615	11.0394	11.0694	11.1881
Tagln2_Q9WVA4	0.0394811	0.731294	1.02914	1.2614	1.0851	-0.975788	-0.579013	-1.01626	-1.52078	-0.0545808	Tagln2	Transgelin-2	Q9WVA4	1.02272	0.00027539	0.0233303	0.387993	sp|Q9WVA4|TAGL2_MOUSE Transgelin-2 OS=Mus musculus OX=10090 GN=Tagln2 PE=1 SV=4				epithelial cell differentiation [GO:0030855]			GO:0030855	R-MMU-114608;	mmu:21346;	17.282	17.4438	17.5135	17.5678	17.5266	17.0445	17.1373	17.035	16.917	17.26
Tpbgl_Q8C013	0.0107078	0.546163	1.08584	1.48019	0.982001	-0.400943	-0.254131	-1.22176	-1.40306	-0.825007	Tpbgl	Trophoblast glycoprotein-like	Q8C013	1.04414	0.000292105	0.0241361	0.482757	sp|Q8C013|TPBGL_MOUSE Trophoblast glycoprotein-like OS=Mus musculus OX=10090 GN=Tpbgl PE=1 SV=2		SUBCELLULAR LOCATION: Membrane {ECO:0000305}; Single-pass type I membrane protein {ECO:0000305}.				integral component of membrane [GO:0016021]	GO:0016021		mmu:100503386;	11.1815	11.3389	11.4976	11.6136	11.4671	11.0605	11.1036	10.8192	10.7658	10.9358
A2m_Q61838	0.84736	1.64995	1.08257	0.440388	0.284992	-0.962752	-1.18787	-1.00419	-0.803739	-0.346708	A2m	Alpha-2-macroglobulin;Alpha-2-macroglobulin 165 kDa subunit;Alpha-2-macroglobulin 35 kDa subunit	Q61838	1.01251	0.000297289	0.0241361	0.235483	sp|Q61838|PZP_MOUSE Pregnancy zone protein OS=Mus musculus OX=10090 GN=Pzp PE=1 SV=3	FUNCTION: Is able to inhibit all four classes of proteinases by a unique 'trapping' mechanism. This protein has a peptide stretch, called the 'bait region' which contains specific cleavage sites for different proteinases. When a proteinase cleaves the bait region, a conformational change is induced in the protein which traps the proteinase. The entrapped enzyme remains active against low molecula…	SUBCELLULAR LOCATION: Secreted.		embryo implantation [GO:0007566]	brain-derived neurotrophic factor binding [GO:0048403]; endopeptidase inhibitor activity [GO:0004866]; nerve growth factor binding [GO:0048406]; protease binding [GO:0002020]; protein-containing complex binding [GO:0044877]; serine-type endopeptidase inhibitor activity [GO:0004867]	collagen-containing extracellular matrix [GO:0062023]; extracellular region [GO:0005576]; extracellular space [GO:0005615]	GO:0002020; GO:0004866; GO:0004867; GO:0005576; GO:0005615; GO:0007566; GO:0044877; GO:0048403; GO:0048406; GO:0062023			19.0524	19.1622	19.0846	18.9968	18.9755	18.8049	18.7741	18.7992	18.8266	18.8891
Slc6a6_O35316	1.10338	1.35473	-0.086247	1.03203	0.744708	-0.607622	-0.840705	-1.56165	-0.849635	-0.28899	Slc6a6	Sodium- and chloride-dependent taurine transporter	O35316	1.02895	0.000305606	0.024305	0.355825	sp|O35316|SC6A6_MOUSE Sodium- and chloride-dependent taurine transporter OS=Mus musculus OX=10090 GN=Slc6a6 PE=1 SV=2	FUNCTION: Sodium-dependent taurine and beta-alanine transporter. Chloride ions are necessary for optimal uptake. {ECO:0000269|PubMed:1465453, ECO:0000269|PubMed:22896705}.	SUBCELLULAR LOCATION: Cell membrane {ECO:0000269|PubMed:1465453}; Multi-pass membrane protein {ECO:0000269|PubMed:1465453}.		alanine transport [GO:0032328]; amino acid import across plasma membrane [GO:0089718]; gamma-aminobutyric acid import [GO:0051939]; import across plasma membrane [GO:0098739]; modulation of chemical synaptic transmission [GO:0050804]; neurotransmitter transport [GO:0006836]; nitrogen compound transport [GO:0071705]; positive regulation of cell differentiation [GO:0045597]; positive regulation of …	alanine transmembrane transporter activity [GO:0022858]; amino acid transmembrane transporter activity [GO:0015171]; gamma-aminobutyric acid transmembrane transporter activity [GO:0015185]; taurine:sodium symporter activity [GO:0005369]; taurine binding [GO:0030977]; taurine transmembrane transporter activity [GO:0005368]	apical plasma membrane [GO:0016324]; basolateral plasma membrane [GO:0016323]; dendrite [GO:0030425]; GABA-ergic synapse [GO:0098982]; integral component of plasma membrane [GO:0005887]; integral component of postsynaptic membrane [GO:0099055]; microvillus membrane [GO:0031528]; neuronal cell body [GO:0043025]; plasma membrane [GO:0005886]; plasma membrane protein complex [GO:0098797]	GO:0005368; GO:0005369; GO:0005886; GO:0005887; GO:0006836; GO:0010940; GO:0015171; GO:0015185; GO:0015734; GO:0016323; GO:0016324; GO:0022858; GO:0030425; GO:0030977; GO:0031528; GO:0032328; GO:0035725; GO:0043025; GO:0045597; GO:0050804; GO:0051939; GO:0071705; GO:0089718; GO:0098739; GO:0098797; GO:0098982; GO:0099055	R-MMU-352230;R-MMU-442660;	mmu:21366;	12.7037	12.7576	12.4487	12.6884	12.6268	12.3369	12.2869	12.1323	12.285	12.4052
Sirt4_Q8R216	0.0321313	1.64666	0.648346	0.833002	0.956609	-1.26303	-1.27299	-0.157242	-0.759158	-0.664327	Sirt4	NAD-dependent protein deacetylase sirtuin-4	Q8R216	1.0303	0.000316163	0.0246173	0.408332	sp|Q8R216|SIR4_MOUSE NAD-dependent protein lipoamidase sirtuin-4, mitochondrial OS=Mus musculus OX=10090 GN=Sirt4 PE=1 SV=3	FUNCTION: Acts as NAD-dependent protein lipoamidase, ADP-ribosyl transferase and deacetylase (PubMed:19220062). Catalyzes more efficiently removal of lipoyl- and biotinyl- than acetyl-lysine modifications. Inhibits the pyruvate dehydrogenase complex (PDH) activity via the enzymatic hydrolysis of the lipoamide cofactor from the E2 component, DLAT, in a phosphorylation-independent manner (PubMed:25…	SUBCELLULAR LOCATION: Mitochondrion matrix {ECO:0000255|HAMAP-Rule:MF_03161, ECO:0000269|PubMed:16959573, ECO:0000269|PubMed:23746352}.		cellular response to DNA damage stimulus [GO:0006974]; cellular response to hypoxia [GO:0071456]; glutamine metabolic process [GO:0006541]; negative regulation of cardiac muscle cell apoptotic process [GO:0010667]; negative regulation of fatty acid oxidation [GO:0046322]; negative regulation of insulin secretion [GO:0046676]; negative regulation of protein processing involved in protein targeting…	biotinidase activity [GO:0047708]; lipoamidase activity [GO:0061690]; NAD+ ADP-ribosyltransferase activity [GO:0003950]; NAD+ binding [GO:0070403]; NAD-dependent protein deacetylase activity [GO:0034979]; zinc ion binding [GO:0008270]	mitochondrial inner membrane [GO:0005743]; mitochondrial matrix [GO:0005759]; mitochondrion [GO:0005739]	GO:0000820; GO:0003950; GO:0005739; GO:0005743; GO:0005759; GO:0006471; GO:0006541; GO:0006974; GO:0008270; GO:0010667; GO:0034979; GO:0034983; GO:0046322; GO:0046676; GO:0046889; GO:0047708; GO:0061690; GO:0070403; GO:0071456; GO:0072350; GO:1903217; GO:1904182	R-MMU-2151201;	mmu:75387;	13.6896	14.0899	13.8424	13.8882	13.9188	13.3684	13.366	13.6426	13.4934	13.5169
Prpf31_Q8CCF0	0.0652949	0.789195	0.494846	1.51876	1.24419	-1.52446	-0.882472	-0.44731	-0.928387	-0.329664	Prpf31	U4/U6 small nuclear ribonucleoprotein Prp31	Q8CCF0	1.02737	0.000325268	0.0246173	0.408731	sp|Q8CCF0|PRP31_MOUSE U4/U6 small nuclear ribonucleoprotein Prp31 OS=Mus musculus OX=10090 GN=Prpf31 PE=1 SV=3	FUNCTION: Involved in pre-mRNA splicing as component of the spliceosome. Required for the assembly of the U4/U5/U6 tri-snRNP complex, one of the building blocks of the spliceosome. {ECO:0000250|UniProtKB:Q8WWY3}.	SUBCELLULAR LOCATION: Nucleus {ECO:0000250|UniProtKB:Q8WWY3}. Nucleus speckle {ECO:0000250|UniProtKB:Q8WWY3}. Nucleus, Cajal body {ECO:0000250|UniProtKB:Q8WWY3}. Note=Predominantly found in speckles and in Cajal bodies. {ECO:0000250|UniProtKB:Q8WWY3}.		mRNA splicing, via spliceosome [GO:0000398]; ribonucleoprotein complex localization [GO:0071166]; spliceosomal tri-snRNP complex assembly [GO:0000244]	identical protein binding [GO:0042802]; ribonucleoprotein complex binding [GO:0043021]; snRNP binding [GO:0070990]; U4atac snRNA binding [GO:0030622]; U4 snRNA binding [GO:0030621]	Cajal body [GO:0015030]; MLL1 complex [GO:0071339]; nuclear speck [GO:0016607]; nucleoplasm [GO:0005654]; nucleus [GO:0005634]; precatalytic spliceosome [GO:0071011]; spliceosomal tri-snRNP complex [GO:0097526]; U2-type precatalytic spliceosome [GO:0071005]; U4/U6 x U5 tri-snRNP complex [GO:0046540]; U4atac snRNP [GO:0005690]; U4 snRNP [GO:0005687]	GO:0000244; GO:0000398; GO:0005634; GO:0005654; GO:0005687; GO:0005690; GO:0015030; GO:0016607; GO:0030621; GO:0030622; GO:0042802; GO:0043021; GO:0046540; GO:0070990; GO:0071005; GO:0071011; GO:0071166; GO:0071339; GO:0097526	R-MMU-72163;	mmu:68988;	15.1566	15.3365	15.2634	15.5178	15.4496	14.7616	14.9211	15.0293	14.9097	15.0585
Itih3_Q61704	0.281304	1.28769	1.56127	0.671161	0.508383	-0.461313	-1.03245	-0.989472	-0.604875	-1.2217	Itih3	Inter-alpha-trypsin inhibitor heavy chain H3	Q61704	1.01477	0.000328686	0.0246173	0.226996	sp|Q61704|ITIH3_MOUSE Inter-alpha-trypsin inhibitor heavy chain H3 OS=Mus musculus OX=10090 GN=Itih3 PE=1 SV=3	FUNCTION: May act as a carrier of hyaluronan in serum or as a binding protein between hyaluronan and other matrix protein, including those on cell surfaces in tissues to regulate the localization, synthesis and degradation of hyaluronan which are essential to cells undergoing biological processes. {ECO:0000250}.	SUBCELLULAR LOCATION: Secreted.		hyaluronan metabolic process [GO:0030212]	serine-type endopeptidase inhibitor activity [GO:0004867]	collagen-containing extracellular matrix [GO:0062023]	GO:0004867; GO:0030212; GO:0062023	R-MMU-114608;	mmu:16426;	15.5143	15.6468	15.6828	15.5656	15.5442	15.4165	15.3413	15.3469	15.3976	15.3164
Hnrnpc_Q9Z204	1.29024	0.86712	0.964947	0.84401	0.408341	-0.623804	-0.873655	-0.85464	-1.66128	-0.361279	Hnrnpc	Heterogeneous nuclear ribonucleoproteins C1/C2	Q9Z204	1.01306	0.000334801	0.0246173	0.205885	sp|Q9Z204|HNRPC_MOUSE Heterogeneous nuclear ribonucleoproteins C1/C2 OS=Mus musculus OX=10090 GN=Hnrnpc PE=1 SV=1	FUNCTION: Binds pre-mRNA and nucleates the assembly of 40S hnRNP particles. Interacts with poly-U tracts in the 3'-UTR or 5'-UTR of mRNA and modulates the stability and the level of translation of bound mRNA molecules. Single HNRNPC tetramers bind 230-240 nucleotides. Trimers of HNRNPC tetramers bind 700 nucleotides. May play a role in the early steps of spliceosome assembly and pre-mRNA splicing…	SUBCELLULAR LOCATION: Nucleus {ECO:0000250|UniProtKB:P07910}. Note=Component of ribonucleosomes. {ECO:0000250|UniProtKB:P07910}.		3'-UTR-mediated mRNA stabilization [GO:0070935]; mRNA splicing, via spliceosome [GO:0000398]; negative regulation of mRNA modification [GO:0090367]; negative regulation of telomere maintenance via telomerase [GO:0032211]	deaminase binding [GO:1990827]; enzyme inhibitor activity [GO:0004857]; identical protein binding [GO:0042802]; mRNA 3'-UTR binding [GO:0003730]; mRNA binding [GO:0003729]; N6-methyladenosine-containing RNA binding [GO:1990247]; poly(U) RNA binding [GO:0008266]; protein domain specific binding [GO:0019904]; ribonucleoprotein complex binding [GO:0043021]; RNA binding [GO:0003723]; telomerase RNA b…	actin cytoskeleton [GO:0015629]; catalytic step 2 spliceosome [GO:0071013]; cytosol [GO:0005829]; nucleoplasm [GO:0005654]; nucleoplasmic periphery of the nuclear pore complex [GO:1990826]; nucleus [GO:0005634]; pronucleus [GO:0045120]; protein-containing complex [GO:0032991]; spliceosomal complex [GO:0005681]; telomerase holoenzyme complex [GO:0005697]	GO:0000398; GO:0003723; GO:0003729; GO:0003730; GO:0004857; GO:0005634; GO:0005654; GO:0005681; GO:0005697; GO:0005829; GO:0008266; GO:0015629; GO:0019904; GO:0032211; GO:0032991; GO:0042802; GO:0043021; GO:0045120; GO:0070034; GO:0070935; GO:0071013; GO:0090367; GO:1990247; GO:1990826; GO:1990827	R-MMU-4570464;R-MMU-72163;R-MMU-72203;	mmu:15381;	16.0229	15.9731	15.9846	15.9704	15.9191	15.7977	15.7683	15.7705	15.6756	15.8285
Esam_Q925F2	-0.0608271	-0.926758	-0.527108	-1.22729	-1.3214	0.418363	1.56874	0.417043	0.370936	1.28831	Esam	Endothelial cell-selective adhesion molecule	Q925F2	1.03818	0.000356494	0.0250355	-0.541608	sp|Q925F2|ESAM_MOUSE Endothelial cell-selective adhesion molecule OS=Mus musculus OX=10090 GN=Esam PE=1 SV=1	FUNCTION: Can mediate aggregation most likely through a homophilic molecular interaction. {ECO:0000269|PubMed:11279107, ECO:0000269|PubMed:11847224}.	SUBCELLULAR LOCATION: Cell junction, adherens junction {ECO:0000305}. Cell junction, tight junction {ECO:0000305}. Cell membrane {ECO:0000305}; Single-pass type I membrane protein {ECO:0000305}.		bicellular tight junction assembly [GO:0070830]; calcium-independent cell-cell adhesion via plasma membrane cell-adhesion molecules [GO:0016338]; cell-cell adhesion [GO:0098609]; cellular protein localization [GO:0034613]; homophilic cell adhesion via plasma membrane adhesion molecules [GO:0007156]; regulation of actin cytoskeleton reorganization [GO:2000249]; regulation of actin filament polymer…	cell-cell adhesion mediator activity [GO:0098632]	adherens junction [GO:0005912]; bicellular tight junction [GO:0005923]; cell-cell junction [GO:0005911]; integral component of membrane [GO:0016021]; plasma membrane [GO:0005886]; protein-containing complex [GO:0032991]	GO:0005886; GO:0005911; GO:0005912; GO:0005923; GO:0007156; GO:0016021; GO:0016338; GO:0030833; GO:0032991; GO:0034613; GO:0070830; GO:0098609; GO:0098632; GO:2000249	R-MMU-202733;	mmu:69524;	14.4353	14.1468	14.28	14.0466	14.0153	14.595	14.9783	14.5946	14.5792	14.8849
Ubfd1_Q78JW9	0.610832	0.380993	0.524165	1.50478	1.19043	-0.0612535	-1.26769	-1.13837	-1.09357	-0.650313	Ubfd1	Ubiquitin domain-containing protein UBFD1	Q78JW9	1.01961	0.00037151	0.0250355	0.263768	sp|Q78JW9|UBFD1_MOUSE Ubiquitin domain-containing protein UBFD1 OS=Mus musculus OX=10090 GN=Ubfd1 PE=1 SV=2									mmu:28018;	13.6756	13.6396	13.662	13.8156	13.7664	13.5704	13.3815	13.4017	13.4087	13.4781
Uba1_Q02053	-0.000459909	0.671299	1.10261	1.28484	1.26357	-1.10755	-1.13129	-0.419793	-0.932442	-0.730779	Uba1	Ubiquitin-like modifier-activating enzyme 1	Q02053	1.01192	0.000374083	0.0250355	0.215094	sp|Q02053|UBA1_MOUSE Ubiquitin-like modifier-activating enzyme 1 OS=Mus musculus OX=10090 GN=Uba1 PE=1 SV=1	FUNCTION: Catalyzes the first step in ubiquitin conjugation to mark cellular proteins for degradation through the ubiquitin-proteasome system (PubMed:1511901). Activates ubiquitin by first adenylating its C-terminal glycine residue with ATP, and thereafter linking this residue to the side chain of a cysteine residue in E1, yielding a ubiquitin-E1 thioester and free AMP. Essential for the formatio…	SUBCELLULAR LOCATION: Cytoplasm {ECO:0000250|UniProtKB:P22314}. Mitochondrion {ECO:0000250|UniProtKB:P22314}. Nucleus {ECO:0000250|UniProtKB:P22314}.		cellular response to DNA damage stimulus [GO:0006974]; protein modification by small protein conjugation [GO:0032446]; protein ubiquitination [GO:0016567]; ubiquitin-dependent protein catabolic process [GO:0006511]	ATP binding [GO:0005524]; ubiquitin activating enzyme activity [GO:0004839]	cytoplasm [GO:0005737]; cytosol [GO:0005829]; desmosome [GO:0030057]; endosome membrane [GO:0010008]; heterochromatin [GO:0000792]; lysosomal membrane [GO:0005765]; mitochondrion [GO:0005739]; nucleoplasm [GO:0005654]; nucleus [GO:0005634]; rough endoplasmic reticulum membrane [GO:0030867]	GO:0000792; GO:0004839; GO:0005524; GO:0005634; GO:0005654; GO:0005737; GO:0005739; GO:0005765; GO:0005829; GO:0006511; GO:0006974; GO:0010008; GO:0016567; GO:0030057; GO:0030867; GO:0032446	R-MMU-8866652;R-MMU-983168;	mmu:22201;	18.1522	18.2358	18.2895	18.3121	18.3095	18.0145	18.0115	18.1001	18.0363	18.0614
Mrc1_Q61830	0.426415	0.455345	1.70682	0.984462	0.546344	-1.50662	-0.923434	-0.983939	-0.140094	-0.565295	Mrc1	Macrophage mannose receptor 1	Q61830	1.02269	0.000379129	0.0250355	0.348783	sp|Q61830|MRC1_MOUSE Macrophage mannose receptor 1 OS=Mus musculus OX=10090 GN=Mrc1 PE=1 SV=2	FUNCTION: Mediates the endocytosis of glycoproteins by macrophages. Binds both sulfated and non-sulfated polysaccharide chains. Acts as phagocytic receptor for bacteria, fungi and other pathogens. {ECO:0000269|PubMed:1421407}.	SUBCELLULAR LOCATION: Endosome membrane {ECO:0000250}; Single-pass type I membrane protein {ECO:0000250}. Cell membrane {ECO:0000250}; Single-pass type I membrane protein {ECO:0000250}.		cellular response to interferon-gamma [GO:0071346]; cellular response to interleukin-4 [GO:0071353]; cellular response to lipopolysaccharide [GO:0071222]; receptor-mediated endocytosis [GO:0006898]	cargo receptor activity [GO:0038024]; mannose binding [GO:0005537]; signaling receptor activity [GO:0038023]; transmembrane signaling receptor activity [GO:0004888]	cell surface [GO:0009986]; endosome membrane [GO:0010008]; integral component of membrane [GO:0016021]; plasma membrane [GO:0005886]	GO:0004888; GO:0005537; GO:0005886; GO:0006898; GO:0009986; GO:0010008; GO:0016021; GO:0038023; GO:0038024; GO:0071222; GO:0071346; GO:0071353	R-MMU-1236978;	mmu:17533;	15.6334	15.6395	15.9044	15.7515	15.6588	15.2242	15.3477	15.3349	15.5135	15.4235
Lcp1_Q61233	0.106656	1.26215	1.32706	1.09243	0.313182	-0.930916	-1.08197	-0.889928	0.0313048	-1.22997	Lcp1	Plastin-2	Q61233	1.02384	0.000394104	0.0250355	0.368255	sp|Q61233|PLSL_MOUSE Plastin-2 OS=Mus musculus OX=10090 GN=Lcp1 PE=1 SV=4	FUNCTION: Actin-binding protein. Plays a role in the activation of T-cells in response to costimulation through TCR/CD3 and CD2 or CD28. Modulates the cell surface expression of IL2RA/CD25 and CD69. {ECO:0000250|UniProtKB:P13796}.	SUBCELLULAR LOCATION: Cytoplasm, cytoskeleton {ECO:0000269|PubMed:14756805}. Cell projection {ECO:0000250}. Cell junction {ECO:0000250}. Cell projection, ruffle membrane {ECO:0000269|PubMed:14756805}; Peripheral membrane protein {ECO:0000269|PubMed:14756805}; Cytoplasmic side {ECO:0000269|PubMed:14756805}. Note=Relocalizes to the immunological synapse between peripheral blood T-lymphocytes and an…		actin filament bundle assembly [GO:0051017]; actin filament network formation [GO:0051639]; animal organ regeneration [GO:0031100]; cell migration [GO:0016477]; extracellular matrix disassembly [GO:0022617]; positive regulation of podosome assembly [GO:0071803]; protein kinase A signaling [GO:0010737]; regulation of intracellular protein transport [GO:0033157]; response to wounding [GO:0009611]; …	actin filament binding [GO:0051015]; calcium ion binding [GO:0005509]; GTPase binding [GO:0051020]; identical protein binding [GO:0042802]; integrin binding [GO:0005178]	actin cytoskeleton [GO:0015629]; actin filament [GO:0005884]; actin filament bundle [GO:0032432]; cytoplasm [GO:0005737]; cytosol [GO:0005829]; filopodium [GO:0030175]; focal adhesion [GO:0005925]; perinuclear region of cytoplasm [GO:0048471]; phagocytic cup [GO:0001891]; plasma membrane [GO:0005886]; podosome [GO:0002102]; ruffle [GO:0001726]; ruffle membrane [GO:0032587]; stress fiber [GO:00017…	GO:0001725; GO:0001726; GO:0001891; GO:0002102; GO:0002286; GO:0005178; GO:0005509; GO:0005737; GO:0005829; GO:0005884; GO:0005886; GO:0005925; GO:0009611; GO:0010737; GO:0015629; GO:0016477; GO:0022617; GO:0030175; GO:0031100; GO:0032432; GO:0032587; GO:0033157; GO:0042802; GO:0048471; GO:0051015; GO:0051017; GO:0051020; GO:0051639; GO:0071803		mmu:18826;	15.656	15.9154	15.9299	15.8773	15.7024	15.4231	15.3892	15.4323	15.6391	15.356
Naga_Q9QWR8	1.24364	0.0866456	0.365922	0.786518	1.65964	-0.92611	-1.17905	-0.377544	-0.537148	-1.12251	Naga	Alpha-N-acetylgalactosaminidase	Q9QWR8	1.02033	0.000394793	0.0250355	0.311158	sp|Q9QWR8|NAGAB_MOUSE Alpha-N-acetylgalactosaminidase OS=Mus musculus OX=10090 GN=Naga PE=1 SV=2	FUNCTION: Removes terminal alpha-N-acetylgalactosamine residues from glycolipids and glycopeptides. Required for the breakdown of glycolipids. {ECO:0000250|UniProtKB:P17050}.	SUBCELLULAR LOCATION: Lysosome {ECO:0000250|UniProtKB:P17050}.		carbohydrate catabolic process [GO:0016052]; glycolipid catabolic process [GO:0019377]; glycoside catabolic process [GO:0016139]; glycosylceramide catabolic process [GO:0046477]; oligosaccharide metabolic process [GO:0009311]	alpha-galactosidase activity [GO:0004557]; alpha-N-acetylgalactosaminidase activity [GO:0008456]; protein homodimerization activity [GO:0042803]	cytoplasm [GO:0005737]; lysosome [GO:0005764]	GO:0004557; GO:0005737; GO:0005764; GO:0008456; GO:0009311; GO:0016052; GO:0016139; GO:0019377; GO:0042803; GO:0046477		mmu:17939;	15.6914	15.4742	15.5266	15.6056	15.7696	15.284	15.2365	15.387	15.357	15.2471
Mrpl22_Q8BU88	0.335572	1.39082	-0.0586485	1.00237	1.38793	-1.25461	-1.12816	-0.559662	-0.901447	-0.214168	Mrpl22	39S ribosomal protein L22, mitochondrial	Q8BU88	1.03056	0.000405899	0.0250355	0.471106	sp|Q8BU88|RM22_MOUSE 39S ribosomal protein L22, mitochondrial OS=Mus musculus OX=10090 GN=Mrpl22 PE=1 SV=1		SUBCELLULAR LOCATION: Mitochondrion {ECO:0000250|UniProtKB:Q9NWU5}.		ribosome assembly [GO:0042255]; translation [GO:0006412]	structural constituent of ribosome [GO:0003735]	large ribosomal subunit [GO:0015934]; mitochondrial large ribosomal subunit [GO:0005762]; mitochondrion [GO:0005739]	GO:0003735; GO:0005739; GO:0005762; GO:0006412; GO:0015934; GO:0042255	R-MMU-5389840;R-MMU-5419276;	mmu:216767;	15.7496	16.0559	15.6352	15.9431	16.055	15.2881	15.3248	15.4898	15.3906	15.59
Pdhx_Q8BKZ9	-0.192891	1.40443	1.25748	0.806684	0.890235	-1.00172	-1.31761	-0.859933	-0.486576	-0.500101	Pdhx	Pyruvate dehydrogenase protein X component, mitochondrial	Q8BKZ9	1.01536	0.000406057	0.0250355	0.285008	sp|Q8BKZ9|ODPX_MOUSE Pyruvate dehydrogenase protein X component, mitochondrial OS=Mus musculus OX=10090 GN=Pdhx PE=1 SV=1	FUNCTION: Required for anchoring dihydrolipoamide dehydrogenase (E3) to the dihydrolipoamide transacetylase (E2) core of the pyruvate dehydrogenase complexes of eukaryotes. This specific binding is essential for a functional PDH complex (By similarity). {ECO:0000250}.	SUBCELLULAR LOCATION: Mitochondrion matrix {ECO:0000250}.		mitochondrial acetyl-CoA biosynthetic process from pyruvate [GO:0061732]	pyruvate dehydrogenase (NAD+) activity [GO:0034604]; transferase activity, transferring acyl groups [GO:0016746]	mitochondrial matrix [GO:0005759]; mitochondrion [GO:0005739]; pyruvate dehydrogenase complex [GO:0045254]	GO:0005739; GO:0005759; GO:0016746; GO:0034604; GO:0045254; GO:0061732	R-MMU-204174;R-MMU-389661;R-MMU-5362517;R-MMU-70268;	mmu:27402;	18.6698	18.943	18.9179	18.8408	18.8551	18.5315	18.4775	18.5558	18.6196	18.6173
Fn1_P11276	0.7258	1.90483	0.808814	0.172238	0.606474	-0.758392	-1.0011	-0.618604	-0.65521	-1.18485	Fn1	Fibronectin;Anastellin	P11276	1.01395	0.000406573	0.0250355	0.250879	sp|P11276|FINC_MOUSE Fibronectin OS=Mus musculus OX=10090 GN=Fn1 PE=1 SV=4	FUNCTION: Fibronectins bind cell surfaces and various compounds including collagen, fibrin, heparin, DNA, and actin. Fibronectins are involved in cell adhesion, cell motility, opsonization, wound healing, and maintenance of cell shape healing, and maintenance of cell shape. Involved in osteoblast compaction through the fibronectin fibrillogenesis cell-mediated matrix assembly process, essential f…	SUBCELLULAR LOCATION: Secreted, extracellular space, extracellular matrix.		acute-phase response [GO:0006953]; angiogenesis [GO:0001525]; blood coagulation, fibrin clot formation [GO:0072378]; calcium-independent cell-matrix adhesion [GO:0007161]; cell activation [GO:0001775]; cell adhesion [GO:0007155]; cell-matrix adhesion [GO:0007160]; cell-substrate junction assembly [GO:0007044]; cellular response to interleukin-1 [GO:0071347]; cellular response to mercury ion [GO:0…	chaperone binding [GO:0051087]; disordered domain specific binding [GO:0097718]; enzyme binding [GO:0019899]; heparin binding [GO:0008201]; identical protein binding [GO:0042802]; integrin binding [GO:0005178]; mercury ion binding [GO:0045340]; peptidase activator activity [GO:0016504]; protease binding [GO:0002020]; protein C-terminus binding [GO:0008022]; proteoglycan binding [GO:0043394]; sign…	apical plasma membrane [GO:0016324]; basement membrane [GO:0005604]; collagen-containing extracellular matrix [GO:0062023]; endoplasmic reticulum-Golgi intermediate compartment [GO:0005793]; extracellular exosome [GO:0070062]; extracellular matrix [GO:0031012]; extracellular space [GO:0005615]; fibrinogen complex [GO:0005577]	GO:0001525; GO:0001775; GO:0001932; GO:0002020; GO:0005102; GO:0005178; GO:0005577; GO:0005604; GO:0005615; GO:0005793; GO:0006953; GO:0007044; GO:0007155; GO:0007160; GO:0007161; GO:0007229; GO:0007399; GO:0007507; GO:0008022; GO:0008201; GO:0008284; GO:0008347; GO:0008360; GO:0010468; GO:0010628; GO:0016324; GO:0016504; GO:0018149; GO:0019899; GO:0030198; GO:0030335; GO:0031012; GO:0032966; GO:…	R-MMU-114608;R-MMU-1474228;R-MMU-1474244;R-MMU-1566977;R-MMU-202733;R-MMU-2129379;R-MMU-216083;R-MMU-3000170;R-MMU-3000171;R-MMU-3000178;R-MMU-354192;R-MMU-354194;R-MMU-372708;R-MMU-381426;R-MMU-5674135;R-MMU-8874081;R-MMU-8957275;	mmu:14268;	18.2147	18.39	18.2271	18.1324	18.197	17.994	17.9579	18.0148	18.0094	17.9306
Pdlim1_O70400	0.398271	1.53633	1.14344	0.559409	0.666327	-1.24265	-1.20081	-0.959838	-0.222366	-0.678117	Pdlim1	PDZ and LIM domain protein 1	O70400	1.01353	0.000411116	0.0250355	0.215255	sp|O70400|PDLI1_MOUSE PDZ and LIM domain protein 1 OS=Mus musculus OX=10090 GN=Pdlim1 PE=1 SV=4	FUNCTION: Cytoskeletal protein that may act as an adapter that brings other proteins (like kinases) to the cytoskeleton (By similarity). Involved in assembly, disassembly and directioning of stress fibers in fibroblasts. Required for the localization of ACTN1 and PALLD to stress fibers. Required for cell migration and in maintaining cell polarity of fibroblasts (By similarity). {ECO:0000250|UniPr…	SUBCELLULAR LOCATION: Cytoplasm, cytoskeleton {ECO:0000269|PubMed:11596114}. Cytoplasm, myofibril, sarcomere, Z line {ECO:0000250|UniProtKB:O00151}. Note=Associates with the actin stress fibers (PubMed:11596114).		actin cytoskeleton organization [GO:0030036]; establishment or maintenance of actin cytoskeleton polarity [GO:0030950]; fibroblast migration [GO:0010761]; heart development [GO:0007507]; maintenance of cell polarity [GO:0030011]; muscle structure development [GO:0061061]; regulation of transcription by RNA polymerase II [GO:0006357]; response to hypoxia [GO:0001666]; stress fiber assembly [GO:004…	actin binding [GO:0003779]; metal ion binding [GO:0046872]; muscle alpha-actinin binding [GO:0051371]; transcription coactivator activity [GO:0003713]	actin cytoskeleton [GO:0015629]; adherens junction [GO:0005912]; cytoplasm [GO:0005737]; cytoskeleton [GO:0005856]; filamentous actin [GO:0031941]; stress fiber [GO:0001725]; transcription regulator complex [GO:0005667]; Z disc [GO:0030018]	GO:0001666; GO:0001725; GO:0003713; GO:0003779; GO:0005667; GO:0005737; GO:0005856; GO:0005912; GO:0006357; GO:0007507; GO:0010761; GO:0015629; GO:0030011; GO:0030018; GO:0030036; GO:0030950; GO:0031941; GO:0043149; GO:0046872; GO:0051371; GO:0061061		mmu:54132;	16.0652	16.2075	16.1584	16.0853	16.0987	15.86	15.8652	15.8954	15.9876	15.9306
Kng1_O08677	0.644807	1.09818	1.29431	1.05555	0.0777076	-1.44186	-1.27441	-0.820602	-0.36943	-0.26425	Kng1	Kininogen-1;Kininogen-1 heavy chain;Bradykinin;Kininogen-1 light chain	O08677	1.01583	0.000411156	0.0250355	0.279743	sp|O08677|KNG1_MOUSE Kininogen-1 OS=Mus musculus OX=10090 GN=Kng1 PE=1 SV=1	FUNCTION: (1) Kininogens are inhibitors of thiol proteases; (2) HMW-kininogen plays an important role in blood coagulation by helping to position optimally prekallikrein and factor XI next to factor XII; (3) HMW-kininogen inhibits the thrombin- and plasmin-induced aggregation of thrombocytes; (4) the active peptide bradykinin that is released from HMW-kininogen shows a variety of physiological ef…	SUBCELLULAR LOCATION: Secreted, extracellular space.		blood coagulation [GO:0007596]; inflammatory response [GO:0006954]; negative regulation of blood coagulation [GO:0030195]; negative regulation of endopeptidase activity [GO:0010951]; positive regulation of cytosolic calcium ion concentration [GO:0007204]; vasodilation [GO:0042311]	cysteine-type endopeptidase inhibitor activity [GO:0004869]; endopeptidase inhibitor activity [GO:0004866]; signaling receptor binding [GO:0005102]	collagen-containing extracellular matrix [GO:0062023]; extracellular region [GO:0005576]; extracellular space [GO:0005615]	GO:0004866; GO:0004869; GO:0005102; GO:0005576; GO:0005615; GO:0006954; GO:0007204; GO:0007596; GO:0010951; GO:0030195; GO:0042311; GO:0062023	R-MMU-114608;R-MMU-140837;R-MMU-375276;R-MMU-381426;R-MMU-416476;R-MMU-418594;R-MMU-8957275;	mmu:16644;	17.9186	17.9947	18.0275	17.9875	17.8235	17.5687	17.5968	17.6729	17.7486	17.7662
Rap1a_P62835	0.558735	0.771096	1.49291	0.469824	0.797715	-1.0696	-1.83723	-0.51286	-0.333737	-0.336853	Rap1a	Ras-related protein Rap-1A	P62835	1.02572	0.000423952	0.0254175	0.367161	sp|P62835|RAP1A_MOUSE Ras-related protein Rap-1A OS=Mus musculus OX=10090 GN=Rap1a PE=1 SV=1	FUNCTION: Induces morphological reversion of a cell line transformed by a Ras oncogene. Counteracts the mitogenic function of Ras, at least partly because it can interact with Ras GAPs and RAF in a competitive manner. Together with ITGB1BP1, regulates KRIT1 localization to microtubules and membranes (By similarity). Plays a role in nerve growth factor (NGF)-induced neurite outgrowth. Plays a role…	SUBCELLULAR LOCATION: Cell membrane {ECO:0000250}; Lipid-anchor {ECO:0000250}. Cell junction {ECO:0000269|PubMed:19635461}. Cytoplasm {ECO:0000250}. Cytoplasm, perinuclear region {ECO:0000250}. Early endosome {ECO:0000250}. Late endosome {ECO:0000250}. Note=Recruited from early endosome to late endosome compartment after nerve growth factor (NGF) stimulation. Colocalized with RAPGEF2 in the perin…		cellular response to cAMP [GO:0071320]; cellular response to drug [GO:0035690]; cellular response to nerve growth factor stimulus [GO:1990090]; cellular response to organic cyclic compound [GO:0071407]; establishment of endothelial barrier [GO:0061028]; liver regeneration [GO:0097421]; negative regulation of collagen biosynthetic process [GO:0032966]; negative regulation of synaptic vesicle exocy…	GDP binding [GO:0019003]; GTPase activity [GO:0003924]; GTP binding [GO:0005525]; protein-containing complex binding [GO:0044877]; Rap guanyl-nucleotide exchange factor activity [GO:0017034]; Ras GTPase binding [GO:0017016]	cell junction [GO:0030054]; cytoplasm [GO:0005737]; early endosome [GO:0005769]; glutamatergic synapse [GO:0098978]; guanyl-nucleotide exchange factor complex [GO:0032045]; late endosome [GO:0005770]; myelin sheath [GO:0043209]; neuron projection [GO:0043005]; perinuclear region of cytoplasm [GO:0048471]; phagocytic vesicle [GO:0045335]; plasma membrane [GO:0005886]	GO:0003924; GO:0005525; GO:0005737; GO:0005769; GO:0005770; GO:0005886; GO:0007264; GO:0007399; GO:0009743; GO:0010976; GO:0017016; GO:0017034; GO:0019003; GO:0030054; GO:0032045; GO:0032486; GO:0032966; GO:0035690; GO:0038180; GO:0043005; GO:0043209; GO:0043547; GO:0044877; GO:0045335; GO:0045860; GO:0046326; GO:0048471; GO:0061028; GO:0070374; GO:0071320; GO:0071407; GO:0072659; GO:0097327; GO:…	R-MMU-170968;R-MMU-170984;R-MMU-354192;R-MMU-354194;R-MMU-372708;R-MMU-381676;R-MMU-392517;R-MMU-5674135;R-MMU-6798695;R-MMU-8875555;	mmu:109905;	14.5832	14.6308	14.7928	14.5632	14.6368	14.2178	14.0455	14.3427	14.3829	14.3822
Msrb3_Q8BU85	0.162101	0.454184	0.779735	1.96081	0.686589	-1.2077	-0.88631	-0.206017	-1.00777	-0.735632	Msrb3	Methionine-R-sulfoxide reductase B3, mitochondrial	Q8BU85	1.03703	0.000432413	0.025532	0.490658	sp|Q8BU85|MSRB3_MOUSE Methionine-R-sulfoxide reductase B3, mitochondrial OS=Mus musculus OX=10090 GN=Msrb3 PE=1 SV=2	FUNCTION: Catalyzes the reduction of free and protein-bound methionine sulfoxide to methionine. {ECO:0000250|UniProtKB:Q8IXL7}.	SUBCELLULAR LOCATION: Endoplasmic reticulum {ECO:0000269|PubMed:15249228}. Note=Not detected in the mitochondrion.		protein repair [GO:0030091]; response to oxidative stress [GO:0006979]	L-methionine-(R)-S-oxide reductase activity [GO:0033745]; peptide-methionine (R)-S-oxide reductase activity [GO:0033743]; zinc ion binding [GO:0008270]	cytoplasm [GO:0005737]; endoplasmic reticulum [GO:0005783]; mitochondrion [GO:0005739]	GO:0005737; GO:0005739; GO:0005783; GO:0006979; GO:0008270; GO:0030091; GO:0033743; GO:0033745	R-MMU-5676934;	mmu:320183;	13.5461	13.6347	13.7334	14.0917	13.7052	13.1305	13.228	13.4344	13.1912	13.2737
Exoc1_Q8R3S6	-0.0625033	1.10942	0.430972	1.2716	1.35009	-0.880137	-0.848391	-0.537884	-1.4979	-0.335265	Exoc1	Exocyst complex component 1	Q8R3S6	1.02288	0.000446608	0.0259612	0.338527	sp|Q8R3S6|EXOC1_MOUSE Exocyst complex component 1 OS=Mus musculus OX=10090 GN=Exoc1 PE=1 SV=4	FUNCTION: Component of the exocyst complex involved in the docking of exocytic vesicles with fusion sites on the plasma membrane. {ECO:0000250}.	SUBCELLULAR LOCATION: Midbody, Midbody ring {ECO:0000250|UniProtKB:Q9NV70}. Note=Colocalizes with CNTRL/centriolin at the midbody ring. {ECO:0000250|UniProtKB:Q9NV70}.		exocyst localization [GO:0051601]; exocytosis [GO:0006887]; Golgi to plasma membrane transport [GO:0006893]; phosphatidylinositol-mediated signaling [GO:0048015]; positive regulation of protein secretion [GO:0050714]; protein transport [GO:0015031]	GTP-Rho binding [GO:0017049]; phosphatidylinositol-4,5-bisphosphate binding [GO:0005546]	cytoplasm [GO:0005737]; cytoplasmic side of apical plasma membrane [GO:0098592]; exocyst [GO:0000145]; Flemming body [GO:0090543]; plasma membrane [GO:0005886]	GO:0000145; GO:0005546; GO:0005737; GO:0005886; GO:0006887; GO:0006893; GO:0015031; GO:0017049; GO:0048015; GO:0050714; GO:0051601; GO:0090543; GO:0098592	R-MMU-264876;R-MMU-5620916;	mmu:69940;	14.9552	15.1972	15.0571	15.2306	15.2468	14.7864	14.793	14.8571	14.6589	14.8989
Rhob_P62746	-0.551207	1.1018	1.36505	1.13606	0.935978	-0.685639	-1.10471	-0.460649	-1.01228	-0.724403	Rhob	Rho-related GTP-binding protein RhoB	P62746	1.10417	0.000455669	0.0259612	1.46892	sp|P62746|RHOB_MOUSE Rho-related GTP-binding protein RhoB OS=Mus musculus OX=10090 GN=Rhob PE=1 SV=1	FUNCTION: Mediates apoptosis in neoplastically transformed cells after DNA damage. Not essential for development but affects cell adhesion and growth factor signaling in transformed cells. Plays a negative role in tumorigenesis as deletion causes tumor formation. Involved in intracellular protein trafficking of a number of proteins. Targets PKN1 to endosomes and is involved in trafficking of the …	SUBCELLULAR LOCATION: Late endosome membrane {ECO:0000269|PubMed:14597666}; Lipid-anchor {ECO:0000269|PubMed:14597666}. Cell membrane {ECO:0000269|PubMed:14597666}; Lipid-anchor {ECO:0000269|PubMed:14597666}. Nucleus {ECO:0000269|PubMed:14597666}. Cleavage furrow {ECO:0000250}. Note=Translocates to the equatorial region before furrow formation in a ECT2-dependent manner (By similarity). Late endo…		actin cytoskeleton organization [GO:0030036]; actin filament organization [GO:0007015]; angiogenesis [GO:0001525]; apoptotic process [GO:0006915]; cell adhesion [GO:0007155]; cell differentiation [GO:0030154]; cell migration [GO:0016477]; cellular response to hydrogen peroxide [GO:0070301]; cellular response to ionizing radiation [GO:0071479]; cortical cytoskeleton organization [GO:0030865]; endo…	GDP binding [GO:0019003]; GTPase activity [GO:0003924]; GTP binding [GO:0005525]; protein kinase binding [GO:0019901]	cell cortex [GO:0005938]; cell projection [GO:0042995]; cleavage furrow [GO:0032154]; cytoplasm [GO:0005737]; cytoplasmic vesicle [GO:0031410]; cytoskeleton [GO:0005856]; cytosol [GO:0005829]; early endosome [GO:0005769]; endosome membrane [GO:0010008]; intracellular membrane-bounded organelle [GO:0043231]; late endosome [GO:0005770]; late endosome membrane [GO:0031902]; membrane [GO:0016020]; nu…	GO:0000281; GO:0001525; GO:0003924; GO:0005525; GO:0005634; GO:0005737; GO:0005769; GO:0005770; GO:0005829; GO:0005856; GO:0005886; GO:0005938; GO:0006886; GO:0006915; GO:0007015; GO:0007155; GO:0007163; GO:0007264; GO:0008333; GO:0008360; GO:0010008; GO:0010595; GO:0016020; GO:0016477; GO:0019003; GO:0019901; GO:0030036; GO:0030154; GO:0030334; GO:0030336; GO:0030865; GO:0031410; GO:0031902; GO:…	R-MMU-114604;R-MMU-194840;R-MMU-416482;R-MMU-416572;R-MMU-5625740;R-MMU-5625900;R-MMU-5627117;R-MMU-5663220;	mmu:11852;	14.3286	15.8508	16.0933	15.8824	15.6981	14.2047	13.8188	14.4119	13.9039	14.1691
Dynlt1_P51807	0.600507	1.32839	0.521067	1.01004	0.807244	-1.43114	-0.237225	-0.874466	-1.39862	-0.325804	Dynlt1	Dynein light chain Tctex-type 1	P51807	1.01767	0.000459668	0.0259612	0.220347	sp|P51807|DYLT1_MOUSE Dynein light chain Tctex-type 1 OS=Mus musculus OX=10090 GN=Dynlt1 PE=1 SV=1	FUNCTION: Acts as one of several non-catalytic accessory components of the cytoplasmic dynein 1 complex that are thought to be involved in linking dynein to cargos and to adapter proteins that regulate dynein function. Cytoplasmic dynein 1 acts as a motor for the intracellular retrograde motility of vesicles and organelles along microtubules. Binds to transport cargos and is involved in apical ca…	SUBCELLULAR LOCATION: Golgi apparatus {ECO:0000250}. Cytoplasm {ECO:0000250}. Cytoplasm, cytoskeleton, spindle {ECO:0000250}. Note=Localizes to mitotic spindles. {ECO:0000250}.		cell division [GO:0051301]; establishment of mitotic spindle orientation [GO:0000132]; negative regulation of ERK1 and ERK2 cascade [GO:0070373]; negative regulation of neurogenesis [GO:0050768]; positive regulation of neuron projection development [GO:0010976]; regulation of G protein-coupled receptor signaling pathway [GO:0008277]	G-protein beta-subunit binding [GO:0031681]; GTP-dependent protein binding [GO:0030742]; identical protein binding [GO:0042802]; motor activity [GO:0003774]; protein C-terminus binding [GO:0008022]	axonal growth cone [GO:0044295]; cell body [GO:0044297]; cytoplasmic dynein complex [GO:0005868]; cytoplasmic microtubule [GO:0005881]; Golgi apparatus [GO:0005794]; growth cone [GO:0030426]; lamellipodium [GO:0030027]; neuronal cell body [GO:0043025]; photoreceptor inner segment [GO:0001917]; secretory vesicle [GO:0099503]; spindle [GO:0005819]	GO:0000132; GO:0001917; GO:0003774; GO:0005794; GO:0005819; GO:0005868; GO:0005881; GO:0008022; GO:0008277; GO:0010976; GO:0030027; GO:0030426; GO:0030742; GO:0031681; GO:0042802; GO:0043025; GO:0044295; GO:0044297; GO:0050768; GO:0051301; GO:0070373; GO:0099503	R-MMU-6798695;	mmu:100040531;mmu:100040563;mmu:100310872;mmu:21648;	12.6565	12.7504	12.6462	12.7093	12.6832	12.3942	12.5483	12.4661	12.3984	12.5369
Iqsec1_Q8R0S2	0.00574626	1.07906	1.16403	1.09219	0.757132	-1.40278	-0.72867	-0.405205	-1.42588	-0.135619	Iqsec1	IQ motif and SEC7 domain-containing protein 1	Q8R0S2	1.02794	0.000477214	0.0262772	0.32551	sp|Q8R0S2|IQEC1_MOUSE IQ motif and SEC7 domain-containing protein 1 OS=Mus musculus OX=10090 GN=Iqsec1 PE=1 SV=2	FUNCTION: Guanine nucleotide exchange factor for ARF1 and ARF6. Guanine nucleotide exchange factor activity is enhanced by lipid binding. Accelerates GTP binding by ARFs of all three classes. Guanine nucleotide exchange protein for ARF6, mediating internalisation of beta-1 integrin (By similarity). Involved in neuronal development (PubMed:31607425). In neurons, plays a role in the control of vesi…	SUBCELLULAR LOCATION: Cytoplasm {ECO:0000250|UniProtKB:Q6DN90}. Nucleus {ECO:0000250|UniProtKB:Q6DN90}. Cell junction, synapse, postsynaptic density {ECO:0000269|PubMed:20547133}. Cytoplasmic vesicle, secretory vesicle, synaptic vesicle {ECO:0000269|PubMed:20547133}. Note=At steady state, may be preferentially cytosolic. {ECO:0000250|UniProtKB:Q6DN90}.		actin cytoskeleton organization [GO:0030036]; dendritic spine development [GO:0060996]; positive regulation of focal adhesion disassembly [GO:0120183]; positive regulation of GTPase activity [GO:0043547]; positive regulation of keratinocyte migration [GO:0051549]; regulation of ARF protein signal transduction [GO:0032012]; regulation of postsynaptic neurotransmitter receptor internalization [GO:0…	ARF guanyl-nucleotide exchange factor activity [GO:0005086]; lipid binding [GO:0008289]; protein kinase binding [GO:0019901]	glutamatergic synapse [GO:0098978]; intracellular membrane-bounded organelle [GO:0043231]; nucleolus [GO:0005730]; postsynaptic density, intracellular component [GO:0099092]; Schaffer collateral - CA1 synapse [GO:0098685]; synaptic vesicle [GO:0008021]	GO:0005086; GO:0005730; GO:0008021; GO:0008289; GO:0019901; GO:0030036; GO:0032012; GO:0043231; GO:0043547; GO:0051549; GO:0060996; GO:0098685; GO:0098978; GO:0099092; GO:0099149; GO:0120183		mmu:232227;	11.8122	12.0253	12.0422	12.0279	11.9614	11.5325	11.6664	11.7306	11.5279	11.7841
Camp_P51437	0.937724	0.389589	1.09945	1.22219	0.342075	-1.90965	-0.109869	-0.944287	-0.324895	-0.702334	Camp	Cathelin-related antimicrobial peptide	P51437	1.07785	0.000481113	0.0262772	0.845207	sp|P51437|CAMP_MOUSE Cathelicidin antimicrobial peptide OS=Mus musculus OX=10090 GN=Camp PE=1 SV=2	FUNCTION: Acts as a potent antimicrobial peptide.	SUBCELLULAR LOCATION: Secreted.		antibacterial humoral response [GO:0019731]; antifungal humoral response [GO:0019732]; antimicrobial humoral immune response mediated by antimicrobial peptide [GO:0061844]; cellular response to interleukin-1 [GO:0071347]; cellular response to interleukin-6 [GO:0071354]; cellular response to lipopolysaccharide [GO:0071222]; cellular response to peptidoglycan [GO:0071224]; cellular response to tumo…	lipopolysaccharide binding [GO:0001530]	cell projection [GO:0042995]; cytoplasm [GO:0005737]; extracellular space [GO:0005615]; specific granule [GO:0042581]	GO:0001530; GO:0001878; GO:0001934; GO:0002227; GO:0002544; GO:0005615; GO:0005737; GO:0008284; GO:0019731; GO:0019732; GO:0032757; GO:0035821; GO:0042581; GO:0042742; GO:0042995; GO:0045087; GO:0045766; GO:0050829; GO:0050830; GO:0051838; GO:0051873; GO:0061844; GO:0071222; GO:0071224; GO:0071347; GO:0071354; GO:0071356	R-MMU-6798695;R-MMU-6803157;	mmu:12796;	11.7754	11.4852	11.8611	11.9261	11.4601	10.2679	11.2208	10.779	11.107	10.9071
Mrpl23_O35972	0.134873	0.330612	0.41757	1.2368	1.92408	-1.10838	-0.612304	-0.679814	-0.980355	-0.663089	Mrpl23	39S ribosomal protein L23, mitochondrial	O35972	1.03276	0.000494943	0.0262772	0.41325	sp|O35972|RM23_MOUSE 39S ribosomal protein L23, mitochondrial OS=Mus musculus OX=10090 GN=Mrpl23 PE=1 SV=1		SUBCELLULAR LOCATION: Mitochondrion {ECO:0000250|UniProtKB:Q16540}.		mitochondrial translation [GO:0032543]; translation [GO:0006412]	structural constituent of ribosome [GO:0003735]	fibrillar center [GO:0001650]; mitochondrial large ribosomal subunit [GO:0005762]; mitochondrion [GO:0005739]	GO:0001650; GO:0003735; GO:0005739; GO:0005762; GO:0006412; GO:0032543	R-MMU-5389840;R-MMU-5419276;	mmu:19935;	12.8571	12.9071	12.9293	13.1386	13.3142	12.5394	12.6662	12.6489	12.5722	12.6532
Alb_P07724	0.191282	0.703569	1.22503	0.88947	1.04926	-0.64004	-1.55993	0.22519	-1.11492	-0.968911	Alb	Serum albumin	P07724	1.01727	0.000498591	0.0262772	0.376436	sp|P07724|ALBU_MOUSE Serum albumin OS=Mus musculus OX=10090 GN=Alb PE=1 SV=3	FUNCTION: Binds water, Ca(2+), Na(+), K(+), fatty acids, hormones, bilirubin and drugs. Its main function is the regulation of the colloidal osmotic pressure of blood. Major zinc transporter in plasma, typically binds about 80% of all plasma zinc (By similarity). Major calcium and magnesium transporter in plasma, binds approximately 45% of circulating calcium and magnesium in plasma (By similarit…	SUBCELLULAR LOCATION: Secreted.		cellular response to starvation [GO:0009267]; maintenance of mitochondrion location [GO:0051659]; negative regulation of apoptotic process [GO:0043066]; positive regulation of circadian sleep/wake cycle, non-REM sleep [GO:0046010]	chaperone binding [GO:0051087]; DNA binding [GO:0003677]; enterobactin binding [GO:1903981]; enzyme binding [GO:0019899]; exogenous protein binding [GO:0140272]; fatty acid binding [GO:0005504]; identical protein binding [GO:0042802]; modified amino acid binding [GO:0072341]; oxygen binding [GO:0019825]; pyridoxal phosphate binding [GO:0030170]; toxic substance binding [GO:0015643]; zinc ion bind…	basement membrane [GO:0005604]; cytoplasm [GO:0005737]; endoplasmic reticulum [GO:0005783]; extracellular exosome [GO:0070062]; extracellular region [GO:0005576]; extracellular space [GO:0005615]; Golgi apparatus [GO:0005794]; myelin sheath [GO:0043209]; protein-containing complex [GO:0032991]	GO:0003677; GO:0005504; GO:0005576; GO:0005604; GO:0005615; GO:0005737; GO:0005783; GO:0005794; GO:0008270; GO:0009267; GO:0015643; GO:0019825; GO:0019899; GO:0030170; GO:0032991; GO:0042802; GO:0043066; GO:0043209; GO:0046010; GO:0051087; GO:0051659; GO:0070062; GO:0072341; GO:0140272; GO:1903981	R-MMU-114608;R-MMU-159418;R-MMU-189451;R-MMU-189483;R-MMU-2168880;R-MMU-381426;R-MMU-879518;R-MMU-8957275;R-MMU-8964058;	mmu:11657;	22.0242	22.143	22.2639	22.1861	22.2232	21.8315	21.6182	22.0321	21.7214	21.7552
Surf1_P09925	1.18169	0.0691952	0.77828	0.912092	1.37306	-0.40168	-0.880822	-0.630862	-1.37139	-1.02957	Surf1	Surfeit locus protein 1	P09925	1.01348	0.000501096	0.0262772	0.201353	sp|P09925|SURF1_MOUSE Surfeit locus protein 1 OS=Mus musculus OX=10090 GN=Surf1 PE=1 SV=3	FUNCTION: Component of the MITRAC (mitochondrial translation regulation assembly intermediate of cytochrome c oxidase complex) complex (By similarity). Regulates cytochrome c oxidase assembly (PubMed:17210671, PubMed:23838831, PubMed:24911525). {ECO:0000250|UniProtKB:Q15526, ECO:0000269|PubMed:17210671, ECO:0000269|PubMed:23838831, ECO:0000269|PubMed:24911525}.	SUBCELLULAR LOCATION: Mitochondrion membrane {ECO:0000269|PubMed:17210671}; Multi-pass membrane protein {ECO:0000255}.		mitochondrial cytochrome c oxidase assembly [GO:0033617]; oxidative phosphorylation [GO:0006119]	cytochrome-c oxidase activity [GO:0004129]	integral component of membrane [GO:0016021]; mitochondrial membrane [GO:0031966]; mitochondrion [GO:0005739]	GO:0004129; GO:0005739; GO:0006119; GO:0016021; GO:0031966; GO:0033617	R-MMU-5628897;R-MMU-611105;	mmu:20930;	15.1812	15.0514	15.1342	15.1498	15.2036	14.9965	14.9406	14.9698	14.8834	14.9232
Rps27_Q6ZWU9	0.184285	1.02387	0.529886	1.28569	1.11675	-1.27248	-1.42787	-0.492637	-0.0337365	-0.913761	Rps27	40S ribosomal protein S27	Q6ZWU9	1.01793	0.000507903	0.0262772	0.27458	sp|Q6ZWU9|RS27_MOUSE 40S ribosomal protein S27 OS=Mus musculus OX=10090 GN=Rps27 PE=1 SV=3	FUNCTION: Component of the small ribosomal subunit (By similarity). Required for proper rRNA processing and maturation of 18S rRNAs (By similarity). {ECO:0000250|UniProtKB:P42677}.			ribosomal small subunit assembly [GO:0000028]; rRNA processing [GO:0006364]; translation [GO:0006412]	metal ion binding [GO:0046872]; RNA binding [GO:0003723]; structural constituent of ribosome [GO:0003735]	cytosolic small ribosomal subunit [GO:0022627]; nucleus [GO:0005634]; postsynaptic density [GO:0014069]	GO:0000028; GO:0003723; GO:0003735; GO:0005634; GO:0006364; GO:0006412; GO:0014069; GO:0022627; GO:0046872	R-MMU-141444;R-MMU-156827;R-MMU-1799339;R-MMU-2467813;R-MMU-2500257;R-MMU-5663220;R-MMU-6791226;R-MMU-68877;R-MMU-72649;R-MMU-72689;R-MMU-72695;R-MMU-72702;R-MMU-72706;R-MMU-9648025;R-MMU-975956;R-MMU-975957;	mmu:100043813;mmu:57294;	15.4794	15.6186	15.5367	15.662	15.634	15.2379	15.2121	15.3672	15.4433	15.2974
Tf_Q921I1	0.196798	1.3933	1.44864	0.393187	0.744574	-1.0668	-1.35136	-0.502172	-0.306335	-0.949826	Tf	Serotransferrin	Q921I1	1.0125	0.000512463	0.0262772	0.250834	sp|Q921I1|TRFE_MOUSE Serotransferrin OS=Mus musculus OX=10090 GN=Tf PE=1 SV=1	FUNCTION: Transferrins are iron binding transport proteins which can bind two Fe(3+) ions in association with the binding of an anion, usually bicarbonate. It is responsible for the transport of iron from sites of absorption and heme degradation to those of storage and utilization. Serum transferrin may also have a further role in stimulating cell proliferation.	SUBCELLULAR LOCATION: Secreted.		actin filament organization [GO:0007015]; activation of JUN kinase activity [GO:0007257]; antibacterial humoral response [GO:0019731]; cellular iron ion homeostasis [GO:0006879]; cellular response to iron ion [GO:0071281]; ERK1 and ERK2 cascade [GO:0070371]; iron ion transport [GO:0006826]; osteoclast differentiation [GO:0030316]; positive regulation of bone resorption [GO:0045780]; positive regu…	ferric iron binding [GO:0008199]; ferrous iron binding [GO:0008198]; iron chaperone activity [GO:0034986]; transferrin receptor binding [GO:1990459]	apical plasma membrane [GO:0016324]; basal part of cell [GO:0045178]; basal plasma membrane [GO:0009925]; basement membrane [GO:0005604]; cell surface [GO:0009986]; cell tip [GO:0051286]; clathrin-coated pit [GO:0005905]; cytoplasmic vesicle [GO:0031410]; dense body [GO:0097433]; early endosome [GO:0005769]; endocytic vesicle [GO:0030139]; endosome [GO:0005768]; extracellular region [GO:0005576];…	GO:0005576; GO:0005604; GO:0005615; GO:0005768; GO:0005769; GO:0005770; GO:0005886; GO:0005905; GO:0006826; GO:0006879; GO:0007015; GO:0007257; GO:0008198; GO:0008199; GO:0009617; GO:0009925; GO:0009986; GO:0016020; GO:0016324; GO:0019731; GO:0030120; GO:0030139; GO:0030316; GO:0031232; GO:0031410; GO:0031643; GO:0031982; GO:0034756; GO:0034986; GO:0042327; GO:0045178; GO:0045780; GO:0045893; GO:…	R-MMU-114608;R-MMU-381426;R-MMU-8856825;R-MMU-8856828;R-MMU-8957275;R-MMU-917937;R-MMU-917977;	mmu:22041;	20.2168	20.3964	20.4047	20.2463	20.299	20.0271	19.9843	20.1118	20.1412	20.0446
Orm1_Q60590	0.730346	1.74814	1.24666	0.543141	-0.286325	-1.00731	-0.502263	-0.836209	-0.522544	-1.11364	Orm1	Alpha-1-acid glycoprotein 1;Alpha-1-acid glycoprotein 2	Q60590	1.04943	0.000530381	0.0268428	0.722375	sp|Q60590|A1AG1_MOUSE Alpha-1-acid glycoprotein 1 OS=Mus musculus OX=10090 GN=Orm1 PE=1 SV=1;sp|P07361|A1AG2_MOUSE Alpha-1-acid glycoprotein 2 OS=Mus musculus OX=10090 GN=Orm2 PE=1 SV=1	FUNCTION: Functions as transport protein in the blood stream. Binds various ligands in the interior of its beta-barrel domain (By similarity). Appears to function in modulating the activity of the immune system during the acute-phase reaction. {ECO:0000250}.	SUBCELLULAR LOCATION: Secreted.		acute-phase response [GO:0006953]; regulation of immune system process [GO:0002682]		extracellular space [GO:0005615]	GO:0002682; GO:0005615; GO:0006953	R-MMU-114608;R-MMU-6798695;	mmu:18405;	15.3061	15.7677	15.5403	15.2212	14.8451	14.5181	14.7471	14.5957	14.7379	14.4698
Pdia4_P08003	0.20463	1.00954	1.47742	1.13529	0.500436	-1.07434	-1.10488	-1.16031	-0.43186	-0.555934	Pdia4	Protein disulfide-isomerase A4	P08003	1.01084	0.000557266	0.0278419	0.193016	sp|P08003|PDIA4_MOUSE Protein disulfide-isomerase A4 OS=Mus musculus OX=10090 GN=Pdia4 PE=1 SV=3		SUBCELLULAR LOCATION: Endoplasmic reticulum lumen {ECO:0000250|UniProtKB:P13667}. Melanosome {ECO:0000250|UniProtKB:P13667}.		chaperone-mediated protein folding [GO:0061077]; positive regulation of protein folding [GO:1903334]; protein folding [GO:0006457]; response to endoplasmic reticulum stress [GO:0034976]	peptide disulfide oxidoreductase activity [GO:0015037]; protein disulfide isomerase activity [GO:0003756]	cell surface [GO:0009986]; endoplasmic reticulum [GO:0005783]; endoplasmic reticulum chaperone complex [GO:0034663]; endoplasmic reticulum lumen [GO:0005788]; extracellular space [GO:0005615]; melanosome [GO:0042470]; smooth endoplasmic reticulum [GO:0005790]	GO:0003756; GO:0005615; GO:0005783; GO:0005788; GO:0005790; GO:0006457; GO:0009986; GO:0015037; GO:0034663; GO:0034976; GO:0042470; GO:0061077; GO:1903334		mmu:12304;	17.9194	18.0092	18.0613	18.0232	17.9524	17.7768	17.7734	17.7672	17.8484	17.8346
Mrpl41_Q9CQN7	1.44395	0.480938	0.751388	0.651996	0.816612	-0.751235	-0.472742	-0.123681	-1.79345	-1.00377	Mrpl41	39S ribosomal protein L41, mitochondrial	Q9CQN7	1.01625	0.000587912	0.0285188	0.254181	sp|Q9CQN7|RM41_MOUSE 39S ribosomal protein L41, mitochondrial OS=Mus musculus OX=10090 GN=Mrpl41 PE=1 SV=1	FUNCTION: Component of the mitochondrial ribosome large subunit. Also involved in apoptosis and cell cycle. Enhances p53/TP53 stability, thereby contributing to p53/TP53-induced apoptosis in response to growth-inhibitory condition. Enhances p53/TP53 translocation to the mitochondria. Has the ability to arrest the cell cycle at the G1 phase, possibly by stabilizing the CDKN1A and CDKN1B (p27Kip1) …	SUBCELLULAR LOCATION: Mitochondrion {ECO:0000250|UniProtKB:Q8IXM3}.		apoptotic process [GO:0006915]; cell cycle [GO:0007049]; translation [GO:0006412]	structural constituent of ribosome [GO:0003735]	mitochondrial large ribosomal subunit [GO:0005762]; mitochondrion [GO:0005739]; ribonucleoprotein complex [GO:1990904]	GO:0003735; GO:0005739; GO:0005762; GO:0006412; GO:0006915; GO:0007049; GO:1990904	R-MMU-5389840;R-MMU-5419276;	mmu:107733;	15.9895	15.8418	15.8833	15.868	15.8933	15.6529	15.6956	15.7491	15.4931	15.6142
Lyar_Q08288	0.366641	0.731931	0.719573	0.958944	1.36314	-1.16769	0.246229	-1.37957	-0.831054	-1.00814	Lyar	Cell growth-regulating nucleolar protein	Q08288	1.02077	0.000591226	0.0285188	0.256294	sp|Q08288|LYAR_MOUSE Cell growth-regulating nucleolar protein OS=Mus musculus OX=10090 GN=Lyar PE=1 SV=2	FUNCTION: Plays a role in the maintenance of the appropriate processing of 47S/45S pre-rRNA to 32S/30S pre-rRNAs and their subsequent processing to produce 18S and 28S rRNAs (By similarity). Also acts at the level of transcription regulation. Along with PRMT5, binds embryonic globin promoter (By similarity). Represses the expression of embryonic globin Hbb-y gene (PubMed:25092918). In neuroblasto…	SUBCELLULAR LOCATION: Nucleus, nucleolus {ECO:0000269|PubMed:19489080, ECO:0000269|PubMed:23212345, ECO:0000269|PubMed:24990247, ECO:0000269|PubMed:8491376}. Cytoplasm {ECO:0000269|PubMed:24990247}. Cell projection, cilium, photoreceptor outer segment {ECO:0000269|PubMed:25735755}. Note=Component of pre-ribosomal particles, including pre-40S, pre-60S and pre-90S (By similarity). Associated with c…		erythrocyte development [GO:0048821]; innate immune response [GO:0045087]; negative regulation of innate immune response [GO:0045824]; negative regulation of transcription by RNA polymerase II [GO:0000122]; positive regulation of phagocytosis [GO:0050766]; positive regulation of transcription by RNA polymerase I [GO:0045943]; rRNA processing [GO:0006364]	activating transcription factor binding [GO:0033613]; DNA binding [GO:0003677]; DNA-binding transcription factor inhibitor activity [GO:0140416]; identical protein binding [GO:0042802]; metal ion binding [GO:0046872]	cytoplasm [GO:0005737]; nucleolus [GO:0005730]; nucleoplasm [GO:0005654]; nucleus [GO:0005634]; photoreceptor outer segment [GO:0001750]	GO:0000122; GO:0001750; GO:0003677; GO:0005634; GO:0005654; GO:0005730; GO:0005737; GO:0006364; GO:0033613; GO:0042802; GO:0045087; GO:0045824; GO:0045943; GO:0046872; GO:0048821; GO:0050766; GO:0140416		mmu:17089;	12.522	12.5785	12.5766	12.6136	12.6762	12.2845	12.5033	12.2517	12.3366	12.3092
Il16_O54824	0.687653	0.798689	0.65833	0.436009	1.4292	-1.47147	-0.70207	0.21551	-0.571217	-1.48063	Il16	Pro-interleukin-16;Interleukin-16	O54824	1.03043	0.000597229	0.0285188	0.419794	sp|O54824|IL16_MOUSE Pro-interleukin-16 OS=Mus musculus OX=10090 GN=Il16 PE=1 SV=3	FUNCTION: Interleukin-16 stimulates a migratory response in CD4+ lymphocytes, monocytes, and eosinophils. Primes CD4+ T-cells for IL-2 and IL-15 responsiveness. Also induces T-lymphocyte expression of interleukin 2 receptor. Ligand for CD4.; FUNCTION: Isoform 1 may act as a scaffolding protein that anchors ion channels in the membrane.; FUNCTION: Isoform 2 is involved in cell cycle progression in…	SUBCELLULAR LOCATION: Secreted {ECO:0000250}.; SUBCELLULAR LOCATION: [Isoform 1]: Cytoplasm {ECO:0000269|PubMed:10479680}. Note=Colocalizes with GRIN2C in neuronal cell bodies and neurites.; SUBCELLULAR LOCATION: [Isoform 2]: Cytoplasm. Nucleus {ECO:0000250}.		cytokine-mediated signaling pathway [GO:0019221]; induction of positive chemotaxis [GO:0050930]; leukocyte chemotaxis [GO:0030595]; positive regulation of chemokine production [GO:0032722]; positive regulation of gene expression [GO:0010628]; positive regulation of inflammatory response [GO:0050729]; positive regulation of interleukin-12 production [GO:0032735]; positive regulation of interleukin…	CD4 receptor binding [GO:0042609]; cytokine activity [GO:0005125]	collagen-containing extracellular matrix [GO:0062023]; cytosol [GO:0005829]; extracellular space [GO:0005615]; Flemming body [GO:0090543]; nuclear speck [GO:0016607]; plasma membrane [GO:0005886]	GO:0005125; GO:0005615; GO:0005829; GO:0005886; GO:0010628; GO:0016607; GO:0019221; GO:0030595; GO:0032722; GO:0032730; GO:0032735; GO:0032755; GO:0042609; GO:0050729; GO:0050930; GO:0051924; GO:0062023; GO:0090543; GO:1902565	R-MMU-449836;	mmu:16170;	14.1864	14.2155	14.1787	14.1205	14.3805	13.6213	13.8227	14.0628	13.8569	13.6189
Sdhd_Q9CXV1	0.246975	1.12608	0.625693	1.61332	0.475248	-1.17093	-1.42732	-0.944671	-0.302828	-0.24157	Sdhd	Succinate dehydrogenase [ubiquinone] cytochrome b small subunit, mitochondrial	Q9CXV1	1.02058	0.00060309	0.0285188	0.292716	sp|Q9CXV1|DHSD_MOUSE Succinate dehydrogenase [ubiquinone] cytochrome b small subunit, mitochondrial OS=Mus musculus OX=10090 GN=Sdhd PE=1 SV=2	FUNCTION: Membrane-anchoring subunit of succinate dehydrogenase (SDH) that is involved in complex II of the mitochondrial electron transport chain and is responsible for transferring electrons from succinate to ubiquinone (coenzyme Q). {ECO:0000250}.	SUBCELLULAR LOCATION: Mitochondrion inner membrane {ECO:0000250}; Multi-pass membrane protein {ECO:0000250}.		cellular response to hypoxia [GO:0071456]; mitochondrial electron transport, succinate to ubiquinone [GO:0006121]; regulation of catecholamine secretion [GO:0050433]; tricarboxylic acid cycle [GO:0006099]	heme binding [GO:0020037]; metal ion binding [GO:0046872]; succinate dehydrogenase (ubiquinone) activity [GO:0008177]; succinate dehydrogenase activity [GO:0000104]; ubiquinone binding [GO:0048039]	integral component of membrane [GO:0016021]; mitochondrial inner membrane [GO:0005743]; mitochondrial respiratory chain complex II, succinate dehydrogenase complex (ubiquinone) [GO:0005749]; mitochondrion [GO:0005739]	GO:0000104; GO:0005739; GO:0005743; GO:0005749; GO:0006099; GO:0006121; GO:0008177; GO:0016021; GO:0020037; GO:0046872; GO:0048039; GO:0050433; GO:0071456	R-MMU-71403;	mmu:66925;	14.4112	14.5686	14.479	14.6558	14.4521	14.1573	14.1114	14.1978	14.3128	14.3237
Sf3b3_Q921M3	0.4736	0.480895	-0.0346683	1.09822	1.95904	-0.635655	-1.26023	-0.70512	-0.510393	-0.865677	Sf3b3	Splicing factor 3B subunit 3	Q921M3	1.03597	0.000607407	0.0285188	0.549332	sp|Q921M3|SF3B3_MOUSE Splicing factor 3B subunit 3 OS=Mus musculus OX=10090 GN=Sf3b3 PE=1 SV=1	FUNCTION: Involved in pre-mRNA splicing as a component of the splicing factor SF3B complex, a constituent of the spliceosome. SF3B complex is required for 'A' complex assembly formed by the stable binding of U2 snRNP to the branchpoint sequence (BPS) in pre-mRNA. Sequence independent binding of SF3A/SF3B complex upstream of the branch site is essential, it may anchor U2 snRNP to the pre-mRNA. May…	SUBCELLULAR LOCATION: Nucleus {ECO:0000250|UniProtKB:Q15393}.		mRNA splicing, via spliceosome [GO:0000398]; negative regulation of protein catabolic process [GO:0042177]	nucleic acid binding [GO:0003676]; protein-containing complex binding [GO:0044877]	catalytic step 2 spliceosome [GO:0071013]; nucleolus [GO:0005730]; nucleoplasm [GO:0005654]; nucleus [GO:0005634]; U12-type spliceosomal complex [GO:0005689]; U2-type precatalytic spliceosome [GO:0071005]	GO:0000398; GO:0003676; GO:0005634; GO:0005654; GO:0005689; GO:0005730; GO:0042177; GO:0044877; GO:0071005; GO:0071013	R-MMU-72163;R-MMU-72165;	mmu:101943;	15.7118	15.7143	15.5363	15.9275	16.2247	15.3288	15.1131	15.3048	15.372	15.2493
Spata5_Q3UMC0	0.460594	1.33087	0.529318	1.14307	0.639199	-1.56412	-1.17896	-1.01118	-0.399722	0.0509361	Spata5	Spermatogenesis-associated protein 5	Q3UMC0	1.01828	0.00062063	0.0287928	0.275142	sp|Q3UMC0|AFG2H_MOUSE ATPase family protein 2 homolog OS=Mus musculus OX=10090 GN=Spata5 PE=1 SV=2	FUNCTION: ATP-dependent chaperone which uses the energy provided by ATP hydrolysis to generate mechanical force to disassemble protein complexes (By similarity). May be involved in morphological and functional mitochondrial transformations during spermatogenesis (PubMed:10734318). {ECO:0000250|UniProtKB:P32794, ECO:0000269|PubMed:10734318}.	SUBCELLULAR LOCATION: Cytoplasm {ECO:0000269|PubMed:10734318}. Mitochondrion {ECO:0000269|PubMed:10734318}. Cytoplasm, cytoskeleton, spindle {ECO:0000250|UniProtKB:Q8NB90}.		brain development [GO:0007420]; cell differentiation [GO:0030154]; spermatogenesis [GO:0007283]	ATPase activity [GO:0016887]; ATP binding [GO:0005524]	cytoplasm [GO:0005737]; mitochondrion [GO:0005739]; spindle [GO:0005819]	GO:0005524; GO:0005737; GO:0005739; GO:0005819; GO:0007283; GO:0007420; GO:0016887; GO:0030154		mmu:57815;	15.2661	15.412	15.2777	15.3806	15.2961	14.9267	14.9913	15.0194	15.1219	15.1975
Cap1_P40124	-0.593917	0.955365	1.18982	1.41026	0.997477	-0.628753	-0.480724	-0.976417	-0.958986	-0.91412	Cap1	Adenylyl cyclase-associated protein 1	P40124	1.03259	0.000667494	0.0306026	0.563192	sp|P40124|CAP1_MOUSE Adenylyl cyclase-associated protein 1 OS=Mus musculus OX=10090 GN=Cap1 PE=1 SV=4	FUNCTION: Directly regulates filament dynamics and has been implicated in a number of complex developmental and morphological processes, including mRNA localization and the establishment of cell polarity. {ECO:0000250}.	SUBCELLULAR LOCATION: Cell membrane {ECO:0000250}; Peripheral membrane protein {ECO:0000250}.		actin cytoskeleton organization [GO:0030036]; actin polymerization or depolymerization [GO:0008154]; ameboidal-type cell migration [GO:0001667]; cell morphogenesis [GO:0000902]; establishment or maintenance of cell polarity [GO:0007163]; receptor-mediated endocytosis [GO:0006898]; regulation of adenylate cyclase activity [GO:0045761]	actin binding [GO:0003779]; adenylate cyclase binding [GO:0008179]	cortical actin cytoskeleton [GO:0030864]; cytoplasm [GO:0005737]; cytosol [GO:0005829]; extracellular region [GO:0005576]; plasma membrane [GO:0005886]	GO:0000902; GO:0001667; GO:0003779; GO:0005576; GO:0005737; GO:0005829; GO:0005886; GO:0006898; GO:0007163; GO:0008154; GO:0008179; GO:0030036; GO:0030864; GO:0045761	R-MMU-6798695;	mmu:12331;	17.3519	17.9029	17.9863	18.0647	17.9179	17.3395	17.3922	17.2159	17.2221	17.2381
Bsdc1_Q80Y55	0.353618	0.911093	1.00486	1.47417	0.457631	-1.2418	-1.11807	0.0648469	-1.09293	-0.813429	Bsdc1	BSD domain-containing protein 1	Q80Y55	1.01613	0.000688044	0.031178	0.215467	sp|Q80Y55|BSDC1_MOUSE BSD domain-containing protein 1 OS=Mus musculus OX=10090 GN=Bsdc1 PE=1 SV=1									mmu:100383;	13.5137	13.5852	13.5972	13.6574	13.527	13.3091	13.325	13.4767	13.3282	13.3641
Wdr1_O88342	0.00365291	1.15996	0.30402	1.29093	1.41368	-1.22072	-0.471846	-1.1094	-0.770657	-0.599627	Wdr1	WD repeat-containing protein 1	O88342	1.01272	0.000721308	0.0318955	0.222411	sp|O88342|WDR1_MOUSE WD repeat-containing protein 1 OS=Mus musculus OX=10090 GN=Wdr1 PE=1 SV=3	FUNCTION: Induces disassembly of actin filaments in conjunction with ADF/cofilin family proteins (By similarity). Enhances cofilin-mediated actin severing (PubMed:25915128). Involved in cytokinesis. Involved in chemotactic cell migration by restricting lamellipodial membrane protrusions (By similarity). Involved in myocardium sarcomere organization. Required for cardiomyocyte growth at the postna…	SUBCELLULAR LOCATION: Cytoplasm, cytoskeleton {ECO:0000250|UniProtKB:Q5RKI0}. Cell projection, podosome {ECO:0000250|UniProtKB:O75083}.		actin cytoskeleton organization [GO:0030036]; actin filament depolymerization [GO:0030042]; actin filament fragmentation [GO:0030043]; apical junction assembly [GO:0043297]; cortical cytoskeleton organization [GO:0030865]; establishment of planar polarity of follicular epithelium [GO:0042247]; locomotion [GO:0040011]; maintenance of epithelial cell apical/basal polarity [GO:0045199]; neutrophil m…	actin binding [GO:0003779]; actin filament binding [GO:0051015]	actin cytoskeleton [GO:0015629]; actin filament [GO:0005884]; cell-cell junction [GO:0005911]; cell junction [GO:0030054]; cell projection [GO:0042995]; cortical actin cytoskeleton [GO:0030864]; myelin sheath [GO:0043209]; plasma membrane [GO:0005886]; podosome [GO:0002102]	GO:0002102; GO:0002446; GO:0003779; GO:0005884; GO:0005886; GO:0005911; GO:0007605; GO:0008360; GO:0015629; GO:0030036; GO:0030042; GO:0030043; GO:0030054; GO:0030220; GO:0030834; GO:0030836; GO:0030864; GO:0030865; GO:0040011; GO:0042247; GO:0042995; GO:0043209; GO:0043297; GO:0045199; GO:0045214; GO:0048713; GO:0051015; GO:0060307; GO:1990266	R-MMU-114608;	mmu:22388;	17.6036	17.7577	17.6436	17.7751	17.7915	17.4404	17.5402	17.4552	17.5004	17.5232
Lrp1_Q91ZX7	0.163299	1.35652	0.836854	1.41153	0.658799	-0.9007	-0.759469	-0.866813	-1.12604	-0.773978	Lrp1	Prolow-density lipoprotein receptor-related protein 1;Low-density lipoprotein receptor-related protein 1 85 kDa subunit;Low-density lipoprotein receptor-related protein 1 515 kDa subunit;Low-density lipoprotein receptor-related protein 1 intracellular domain	Q91ZX7	1.00951	0.000728205	0.0318955	0.165554	sp|Q91ZX7|LRP1_MOUSE Prolow-density lipoprotein receptor-related protein 1 OS=Mus musculus OX=10090 GN=Lrp1 PE=1 SV=1	FUNCTION: Endocytic receptor involved in endocytosis and in phagocytosis of apoptotic cells. Required for early embryonic development (PubMed:1423604). Involved in cellular lipid homeostasis. Involved in the plasma clearance of chylomicron remnants and activated LRPAP1 (alpha 2-macroglobulin), as well as the local metabolism of complexes between plasminogen activators and their endogenous inhibit…	SUBCELLULAR LOCATION: [Low-density lipoprotein receptor-related protein 1 85 kDa subunit]: Cell membrane {ECO:0000250|UniProtKB:Q07954}; Single-pass type I membrane protein {ECO:0000250|UniProtKB:Q07954}. Membrane, coated pit {ECO:0000250|UniProtKB:Q07954}.; SUBCELLULAR LOCATION: [Low-density lipoprotein receptor-related protein 1 515 kDa subunit]: Cell membrane {ECO:0000250|UniProtKB:Q07954}; Pe…		amyloid-beta clearance [GO:0097242]; amyloid-beta clearance by cellular catabolic process [GO:0150094]; amyloid-beta clearance by transcytosis [GO:0150093]; aorta morphogenesis [GO:0035909]; apoptotic cell clearance [GO:0043277]; astrocyte activation involved in immune response [GO:0002265]; cardiac septum development [GO:0003279]; cell population proliferation [GO:0008283]; cellular lipid catabo…	alpha-2 macroglobulin receptor activity [GO:0016964]; apolipoprotein binding [GO:0034185]; calcium ion binding [GO:0005509]; cargo receptor activity [GO:0038024]; clathrin heavy chain binding [GO:0032050]; coreceptor activity [GO:0015026]; protease binding [GO:0002020]; protein-containing complex binding [GO:0044877]	apical part of cell [GO:0045177]; axonal growth cone [GO:0044295]; basolateral plasma membrane [GO:0016323]; clathrin-coated pit [GO:0005905]; clathrin-coated vesicle [GO:0030136]; cytoskeleton [GO:0005856]; dendrite [GO:0030425]; early endosome [GO:0005769]; endosome [GO:0005768]; external side of plasma membrane [GO:0009897]; insulin-responsive compartment [GO:0032593]; integral component of pl…	GO:0002020; GO:0002265; GO:0003279; GO:0005509; GO:0005634; GO:0005768; GO:0005769; GO:0005856; GO:0005887; GO:0005905; GO:0006898; GO:0006909; GO:0007041; GO:0007204; GO:0007205; GO:0008203; GO:0008283; GO:0009897; GO:0010812; GO:0010875; GO:0010942; GO:0010976; GO:0010977; GO:0014912; GO:0015026; GO:0016020; GO:0016323; GO:0016964; GO:0030136; GO:0030178; GO:0030425; GO:0032050; GO:0032092; GO:…	R-MMU-2168880;R-MMU-975634;	mmu:16971;	17.5021	17.6137	17.5651	17.6188	17.5485	17.4027	17.4159	17.4058	17.3816	17.4145
Cd300lg_Q1ERP8	-0.657863	0.930034	1.23484	1.44719	0.968088	-0.901254	-0.829527	-0.831443	-0.559037	-0.801035	Cd300lg	CMRF35-like molecule 9	Q1ERP8	1.06107	0.00073472	0.0318955	0.817088	sp|Q1ERP8|CLM9_MOUSE CMRF35-like molecule 9 OS=Mus musculus OX=10090 GN=Cd300lg PE=1 SV=1	FUNCTION: Receptor which may mediate L-selectin-dependent lymphocyte rollings. Binds SELL in a calcium dependent manner. Binds lymphocyte. {ECO:0000269|PubMed:16754720, ECO:0000269|PubMed:16876123}.	SUBCELLULAR LOCATION: Apical cell membrane {ECO:0000269|PubMed:16754720, ECO:0000269|PubMed:16876123}; Single-pass type I membrane protein {ECO:0000305|PubMed:16754720}. Basolateral cell membrane {ECO:0000269|PubMed:16754720, ECO:0000269|PubMed:16876123}; Single-pass type I membrane protein {ECO:0000305|PubMed:16754720}. Endosome, multivesicular body membrane {ECO:0000269|PubMed:16876123}; Single…		immune system process [GO:0002376]; immunoglobulin transcytosis in epithelial cells [GO:0002414]	IgM binding [GO:0001791]	apical plasma membrane [GO:0016324]; basolateral plasma membrane [GO:0016323]; integral component of membrane [GO:0016021]; multivesicular body membrane [GO:0032585]	GO:0001791; GO:0002376; GO:0002414; GO:0016021; GO:0016323; GO:0016324; GO:0032585	R-MMU-198933;	mmu:52685;	13.4444	14.2713	14.4301	14.5407	14.2912	13.3176	13.355	13.354	13.4958	13.3698
Mpp1_P70290	0.705828	1.04151	0.958254	0.876527	0.79071	-1.20924	-0.528909	-1.00817	-1.52884	-0.0976794	Mpp1	55 kDa erythrocyte membrane protein	P70290	1.01049	0.000736617	0.0318955	0.17289	sp|P70290|EM55_MOUSE 55 kDa erythrocyte membrane protein OS=Mus musculus OX=10090 GN=Mpp1 PE=1 SV=1	FUNCTION: Essential regulator of neutrophil polarity. Regulates neutrophil polarization by regulating AKT1 phosphorylation through a mechanism that is independent of PIK3CG activity. {ECO:0000269|PubMed:19897731}.	SUBCELLULAR LOCATION: Cell membrane {ECO:0000250|UniProtKB:Q00013}; Lipid-anchor {ECO:0000250|UniProtKB:Q00013}. Cell projection, stereocilium {ECO:0000269|PubMed:16829577, ECO:0000269|PubMed:17584769}. Note=Colocalizes with WHRN at stereocilium tip during hair cell development (PubMed:16829577). Colocalizes with MPP5 in the retina, at the outer limiting membrane (OLM) (PubMed:17584769). Colocali…		regulation of neutrophil chemotaxis [GO:0090022]		centriolar satellite [GO:0034451]; cortical cytoskeleton [GO:0030863]; membrane [GO:0016020]; plasma membrane [GO:0005886]; stereocilium [GO:0032420]	GO:0005886; GO:0016020; GO:0030863; GO:0032420; GO:0034451; GO:0090022		mmu:17524;	16.6442	16.6774	16.6692	16.6611	16.6526	16.4549	16.5222	16.4748	16.4234	16.5648
Ap2b1_Q9DBG3	0.90625	0.987537	0.110562	1.33078	0.985538	-1.42159	-1.1182	-0.37508	-0.859259	-0.546532	Ap2b1	AP-2 complex subunit beta	Q9DBG3	1.01019	0.000756416	0.0321113	0.180637	sp|Q9DBG3|AP2B1_MOUSE AP-2 complex subunit beta OS=Mus musculus OX=10090 GN=Ap2b1 PE=1 SV=1	FUNCTION: Component of the adaptor protein complex 2 (AP-2). Adaptor protein complexes function in protein transport via transport vesicles in different membrane traffic pathways. Adaptor protein complexes are vesicle coat components and appear to be involved in cargo selection and vesicle formation. AP-2 is involved in clathrin-dependent endocytosis in which cargo proteins are incorporated into …	SUBCELLULAR LOCATION: Cell membrane {ECO:0000250}. Membrane, coated pit {ECO:0000250}; Peripheral membrane protein {ECO:0000250}; Cytoplasmic side {ECO:0000250}. Note=AP-2 appears to be excluded from internalizing CCVs and to disengage from sites of endocytosis seconds before internalization of the nascent CCV. {ECO:0000250}.		aorta development [GO:0035904]; cardiac septum development [GO:0003279]; clathrin coat assembly [GO:0048268]; clathrin-dependent endocytosis [GO:0072583]; coronary vasculature development [GO:0060976]; heart development [GO:0007507]; intracellular protein transport [GO:0006886]; kidney development [GO:0001822]; negative regulation of neuron death [GO:1901215]; neurotransmitter receptor internaliz…	clathrin binding [GO:0030276]; protein-containing complex binding [GO:0044877]	AP-2 adaptor complex [GO:0030122]; clathrin adaptor complex [GO:0030131]; glutamatergic synapse [GO:0098978]; postsynapse [GO:0098794]	GO:0001822; GO:0003279; GO:0003281; GO:0006886; GO:0007507; GO:0016192; GO:0030122; GO:0030131; GO:0030276; GO:0035904; GO:0044877; GO:0045807; GO:0048268; GO:0060976; GO:0072583; GO:0098794; GO:0098884; GO:0098978; GO:0099590; GO:1901215; GO:1905477	R-MMU-177504;R-MMU-2132295;R-MMU-416993;R-MMU-437239;R-MMU-5099900;R-MMU-5140745;R-MMU-8856825;R-MMU-8856828;R-MMU-8866427;R-MMU-8964038;	mmu:71770;	17.9056	17.9141	17.8224	17.95	17.9139	17.6623	17.694	17.7717	17.7211	17.7538
Cd34_Q64314	0.522569	0.820441	0.472004	2	0.139501	-1.17118	-0.639412	-0.245171	-1.08866	-0.832954	Cd34	Hematopoietic progenitor cell antigen CD34	Q64314	1.0311	0.000763228	0.0321113	0.390986	sp|Q64314|CD34_MOUSE Hematopoietic progenitor cell antigen CD34 OS=Mus musculus OX=10090 GN=Cd34 PE=1 SV=1	FUNCTION: Possible adhesion molecule with a role in early hematopoiesis by mediating the attachment of stem cells to the bone marrow extracellular matrix or directly to stromal cells. Could act as a scaffold for the attachment of lineage specific glycans, allowing stem cells to bind to lectins expressed by stromal cells or other marrow components. Presents carbohydrate ligands to selectins (By si…	SUBCELLULAR LOCATION: Membrane; Single-pass type I membrane protein.		cell-cell adhesion [GO:0098609]; cell-matrix adhesion [GO:0007160]; endothelial cell proliferation [GO:0001935]; extracellular exosome assembly [GO:0071971]; glomerular endothelium development [GO:0072011]; glomerular filtration [GO:0003094]; hematopoietic stem cell proliferation [GO:0071425]; hemopoiesis [GO:0030097]; leukocyte migration [GO:0050900]; mesangial cell-matrix adhesion [GO:0035759];…	carbohydrate binding [GO:0030246]; sulfate binding [GO:0043199]; transcription factor binding [GO:0008134]	apical plasma membrane [GO:0016324]; basal plasma membrane [GO:0009925]; cell periphery [GO:0071944]; cell surface [GO:0009986]; cytoplasm [GO:0005737]; external side of plasma membrane [GO:0009897]; extracellular region [GO:0005576]; glomerular endothelium fenestra [GO:0036053]; intercellular bridge [GO:0045171]; lysosome [GO:0005764]; membrane [GO:0016020]; perinuclear region of cytoplasm [GO:0…	GO:0001894; GO:0001935; GO:0003094; GO:0005576; GO:0005737; GO:0005764; GO:0005886; GO:0007160; GO:0007165; GO:0008134; GO:0008217; GO:0009897; GO:0009925; GO:0009986; GO:0010629; GO:0016020; GO:0016324; GO:0030097; GO:0030195; GO:0030246; GO:0032703; GO:0032720; GO:0032733; GO:0035759; GO:0036053; GO:0038001; GO:0042482; GO:0043199; GO:0045019; GO:0045171; GO:0045766; GO:0048471; GO:0050900; GO:…		mmu:12490;	12.8942	12.9674	12.8818	13.2629	12.8001	12.478	12.6087	12.7056	12.4983	12.5611
Morf4l2_Q9R0Q4	0.483745	1.0178	-0.214168	1.04842	1.68179	-1.2387	-0.873845	-0.598502	-1.00461	-0.301928	Morf4l2	Mortality factor 4-like protein 2	Q9R0Q4	1.02332	0.000781974	0.0321113	0.315266	sp|Q9R0Q4|MO4L2_MOUSE Mortality factor 4-like protein 2 OS=Mus musculus OX=10090 GN=Morf4l2 PE=1 SV=1	FUNCTION: Component of the NuA4 histone acetyltransferase complex which is involved in transcriptional activation of select genes principally by acetylation of nucleosomal histone H4 and H2A. This modification may both alter nucleosome - DNA interactions and promote interaction of the modified histones with other proteins which positively regulate transcription. This complex may be required for t…	SUBCELLULAR LOCATION: Nucleus {ECO:0000255|PROSITE-ProRule:PRU00972}.		chromatin silencing [GO:0006342]; DNA repair [GO:0006281]; histone acetylation [GO:0016573]; histone deacetylation [GO:0016575]; histone H2A acetylation [GO:0043968]; histone H4 acetylation [GO:0043967]; positive regulation of striated muscle cell differentiation [GO:0051155]; positive regulation of transcription by RNA polymerase II [GO:0045944]; regulation of growth [GO:0040008]		histone acetyltransferase complex [GO:0000123]; NuA4 histone acetyltransferase complex [GO:0035267]; nucleolus [GO:0005730]; nucleoplasm [GO:0005654]; plasma membrane [GO:0005886]	GO:0000123; GO:0005654; GO:0005730; GO:0005886; GO:0006281; GO:0006342; GO:0016573; GO:0016575; GO:0035267; GO:0040008; GO:0043967; GO:0043968; GO:0045944; GO:0051155		mmu:56397;	13.7698	13.8745	13.6329	13.8806	14.0048	13.4319	13.5034	13.5575	13.4778	13.6156
Hspbp1_Q99P31	-0.624823	0.932279	1.45991	1.29129	0.849469	-0.994618	-0.992551	-0.615146	-0.567228	-0.738583	Hspbp1	Hsp70-binding protein 1	Q99P31	1.0664	0.000786557	0.0321113	0.875289	sp|Q99P31|HPBP1_MOUSE Hsp70-binding protein 1 OS=Mus musculus OX=10090 GN=Hspbp1 PE=1 SV=1	FUNCTION: Inhibits HSPA1A chaperone activity by changing the conformation of the ATP-binding domain of HSPA1A and interfering with ATP binding. Interferes with ubiquitination mediated by STUB1 and inhibits chaperone-assisted degradation of target proteins (By similarity). {ECO:0000250}.			positive regulation of proteasomal ubiquitin-dependent protein catabolic process [GO:0032436]; positive regulation of protein ubiquitination [GO:0031398]	adenyl-nucleotide exchange factor activity [GO:0000774]; ubiquitin protein ligase binding [GO:0031625]	cytoplasm [GO:0005737]; endoplasmic reticulum [GO:0005783]	GO:0000774; GO:0005737; GO:0005783; GO:0031398; GO:0031625; GO:0032436		mmu:66245;	13.2702	14.1421	14.4375	14.3431	14.0957	13.0632	13.0643	13.2756	13.3025	13.2065
Gtpbp8_Q9CY28	-0.161196	1.2801	0.869835	1.18344	0.761214	-0.841774	-1.21863	-1.51319	-0.0207416	-0.339057	Gtpbp8	GTP-binding protein 8	Q9CY28	1.04754	0.000790802	0.0321113	0.535197	sp|Q9CY28|GTPB8_MOUSE GTP-binding protein 8 OS=Mus musculus OX=10090 GN=Gtpbp8 PE=2 SV=1					GTP binding [GO:0005525]; metal ion binding [GO:0046872]	mitochondrion [GO:0005739]	GO:0005525; GO:0005739; GO:0046872		mmu:66067;	11.4697	11.96	11.8204	11.9271	11.7835	11.2382	11.11	11.0098	11.5175	11.4092
Tpm4_Q6IRU2	0.702517	0.728315	1.24324	1.03026	0.358321	-1.54235	-0.0630188	-0.661225	-1.5335	-0.262559	Tpm4	Tropomyosin alpha-4 chain	Q6IRU2	1.01559	0.000791039	0.0321113	0.27052	sp|Q6IRU2|TPM4_MOUSE Tropomyosin alpha-4 chain OS=Mus musculus OX=10090 GN=Tpm4 PE=1 SV=3	FUNCTION: Binds to actin filaments in muscle and non-muscle cells. Plays a central role, in association with the troponin complex, in the calcium dependent regulation of vertebrate striated muscle contraction. Smooth muscle contraction is regulated by interaction with caldesmon. In non-muscle cells is implicated in stabilizing cytoskeleton actin filaments. Binds calcium. {ECO:0000250|UniProtKB:P0…	SUBCELLULAR LOCATION: Cytoplasm, cytoskeleton {ECO:0000250|UniProtKB:P09495}. Note=Associates with F-actin stress fibers. {ECO:0000250|UniProtKB:P09495}.		actin filament organization [GO:0007015]; muscle contraction [GO:0006936]	actin filament binding [GO:0051015]; identical protein binding [GO:0042802]; metal ion binding [GO:0046872]; protein heterodimerization activity [GO:0046982]; protein homodimerization activity [GO:0042803]	actin cytoskeleton [GO:0015629]; actin filament [GO:0005884]; cortical cytoskeleton [GO:0030863]; cytoplasm [GO:0005737]; podosome [GO:0002102]; stress fiber [GO:0001725]	GO:0001725; GO:0002102; GO:0005737; GO:0005884; GO:0006936; GO:0007015; GO:0015629; GO:0030863; GO:0042802; GO:0042803; GO:0046872; GO:0046982; GO:0051015	R-MMU-390522;R-MMU-445355;	mmu:326618;	17.6074	17.6117	17.6974	17.662	17.5501	17.2337	17.48	17.3804	17.2352	17.4468
Tm9sf4_Q8BH24	0.578278	1.07363	0.913559	0.367449	1.09037	-2	-0.81669	-0.514114	-0.215402	-0.429618	Tm9sf4	Transmembrane 9 superfamily member 4	Q8BH24	1.02306	0.000799898	0.0321361	0.30377	sp|Q8BH24|TM9S4_MOUSE Transmembrane 9 superfamily member 4 OS=Mus musculus OX=10090 GN=Tm9sf4 PE=1 SV=1	FUNCTION: Associates with proteins harboring glycine-rich transmembrane domains and ensures their efficient localization to the cell surface. {ECO:0000250|UniProtKB:Q92544}.	SUBCELLULAR LOCATION: Membrane {ECO:0000255}; Multi-pass membrane protein {ECO:0000255}. Golgi apparatus {ECO:0000250|UniProtKB:Q92544}. Early endosome {ECO:0000250|UniProtKB:Q92544}.		cell adhesion [GO:0007155]; phagocytosis [GO:0006909]; positive regulation of protein exit from endoplasmic reticulum [GO:0070863]; positive regulation of protein localization to cell surface [GO:2000010]; protein localization to membrane [GO:0072657]; regulation of intracellular pH [GO:0051453]; response to hypoxia [GO:0001666]; vacuolar proton-transporting V-type ATPase complex assembly [GO:007…		early endosome [GO:0005769]; Golgi apparatus [GO:0005794]; integral component of membrane [GO:0016021]; membrane [GO:0016020]	GO:0001666; GO:0005769; GO:0005794; GO:0006909; GO:0007155; GO:0016020; GO:0016021; GO:0051453; GO:0070072; GO:0070863; GO:0072657; GO:2000010		mmu:99237;	13.4342	13.5277	13.4975	13.3944	13.5309	12.9386	13.1709	13.228	13.2844	13.244
Dhx15_O35286	0.780931	1.27724	-0.228542	0.620991	1.54959	-0.306708	-0.785896	-1.14648	-1.29457	-0.466561	Dhx15	Pre-mRNA-splicing factor ATP-dependent RNA helicase DHX15	O35286	1.02275	0.000815743	0.0324383	0.327334	sp|O35286|DHX15_MOUSE Pre-mRNA-splicing factor ATP-dependent RNA helicase DHX15 OS=Mus musculus OX=10090 GN=Dhx15 PE=1 SV=2	FUNCTION: Pre-mRNA processing factor involved in disassembly of spliceosomes after the release of mature mRNA. In cooperation with TFIP11 seem to be involved in the transition of the U2, U5 and U6 snRNP-containing IL complex to the snRNP-free IS complex leading to efficient debranching and turnover of excised introns (By similarity). {ECO:0000250}.	SUBCELLULAR LOCATION: Nucleus {ECO:0000269|PubMed:9342318}. Nucleus, nucleolus {ECO:0000269|PubMed:9342318}.		mRNA processing [GO:0006397]; response to alkaloid [GO:0043279]; response to toxic substance [GO:0009636]; RNA splicing [GO:0008380]	ATP binding [GO:0005524]; double-stranded RNA binding [GO:0003725]; RNA binding [GO:0003723]; RNA helicase activity [GO:0003724]	nuclear speck [GO:0016607]; nucleolus [GO:0005730]; spliceosomal complex [GO:0005681]; U12-type spliceosomal complex [GO:0005689]; U2-type post-mRNA release spliceosomal complex [GO:0071008]	GO:0003723; GO:0003724; GO:0003725; GO:0005524; GO:0005681; GO:0005689; GO:0005730; GO:0006397; GO:0008380; GO:0009636; GO:0016607; GO:0043279; GO:0071008	R-MMU-72163;	mmu:13204;	14.7118	14.8133	14.5053	14.6791	14.8691	14.4893	14.3913	14.3175	14.2872	14.4566
Chmp1b2_Q9CQD4	0.252407	0.502675	0.873614	1.08418	1.25233	-0.846049	-0.205955	-1.34911	-1.61124	0.0471479	Chmp1b2	Charged multivesicular body protein 1b-2;Charged multivesicular body protein 1b-1	Q9CQD4	1.02776	0.000830213	0.0326143	0.38315	sp|Q9CQD4|CH1B2_MOUSE Charged multivesicular body protein 1b-2 OS=Mus musculus OX=10090 GN=Chmp1b2 PE=2 SV=2;sp|Q99LU0|CH1B1_MOUSE Charged multivesicular body protein 1b-1 OS=Mus musculus OX=10090 GN=Chmp1b1 PE=1 SV=1	FUNCTION: Probable peripherally associated component of the endosomal sorting required for transport complex III (ESCRT-III) which is involved in multivesicular bodies (MVBs) formation and sorting of endosomal cargo proteins into MVBs. MVBs contain intraluminal vesicles (ILVs) that are generated by invagination and scission from the limiting membrane of the endosome and mostly are delivered to ly…	SUBCELLULAR LOCATION: Cytoplasm, cytosol {ECO:0000250}. Endosome {ECO:0000250}. Late endosome membrane {ECO:0000250}; Peripheral membrane protein {ECO:0000250}. Note=Localizes to the midbody of dividing cells, colocalizing with CEP55 and CHMP5. Localized at the periphery of the Fleming body (By similarity). {ECO:0000250}.		cell cycle [GO:0007049]; cell division [GO:0051301]; endosome transport via multivesicular body sorting pathway [GO:0032509]; late endosome to vacuole transport [GO:0045324]; protein transport [GO:0015031]		cytosol [GO:0005829]; ESCRT III complex [GO:0000815]; late endosome membrane [GO:0031902]; multivesicular body [GO:0005771]	GO:0000815; GO:0005771; GO:0005829; GO:0007049; GO:0015031; GO:0031902; GO:0032509; GO:0045324; GO:0051301		mmu:67028;	14.0536	14.1141	14.2037	14.2545	14.2951	13.7882	13.9429	13.6667	13.6034	14.004
Apoh_Q01339	0.239208	1.35725	1.5932	0.275869	0.758999	-1.17946	-1.08806	-0.479333	-0.656255	-0.821424	Apoh	Beta-2-glycoprotein 1	Q01339	1.01176	0.000836908	0.0326143	0.196306	sp|Q01339|APOH_MOUSE Beta-2-glycoprotein 1 OS=Mus musculus OX=10090 GN=Apoh PE=1 SV=1	FUNCTION: Binds to various kinds of negatively charged substances such as heparin, phospholipids, and dextran sulfate. May prevent activation of the intrinsic blood coagulation cascade by binding to phospholipids on the surface of damaged cells.	SUBCELLULAR LOCATION: Secreted.		animal organ regeneration [GO:0031100]; blood coagulation [GO:0007596]; blood coagulation, intrinsic pathway [GO:0007597]; negative regulation of angiogenesis [GO:0016525]; negative regulation of blood coagulation [GO:0030195]; negative regulation of endothelial cell migration [GO:0010596]; negative regulation of endothelial cell proliferation [GO:0001937]; negative regulation of fibrinolysis [GO…	heparin binding [GO:0008201]; identical protein binding [GO:0042802]; lipid binding [GO:0008289]; lipoprotein lipase activator activity [GO:0060230]; phospholipid binding [GO:0005543]	cell surface [GO:0009986]; chylomicron [GO:0042627]; cytoplasm [GO:0005737]; extracellular space [GO:0005615]; high-density lipoprotein particle [GO:0034364]; plasma membrane [GO:0005886]; very-low-density lipoprotein particle [GO:0034361]	GO:0001937; GO:0005543; GO:0005615; GO:0005737; GO:0005886; GO:0006641; GO:0007596; GO:0007597; GO:0008201; GO:0008289; GO:0009986; GO:0010596; GO:0010898; GO:0016525; GO:0030193; GO:0030195; GO:0031100; GO:0031639; GO:0033033; GO:0034197; GO:0034361; GO:0034364; GO:0034392; GO:0042627; GO:0042802; GO:0051006; GO:0051917; GO:0051918; GO:0060230; GO:0060268	R-MMU-114608;	mmu:11818;	16.8166	16.9464	16.9739	16.8208	16.8769	16.6518	16.6624	16.7331	16.7125	16.6934
Hnrnpa3_Q8BG05	0.819829	0.656958	0.939153	0.417199	1.57151	-1.29677	-1.14731	-0.831536	-0.712556	-0.416473	Hnrnpa3	Heterogeneous nuclear ribonucleoprotein A3	Q8BG05	1.00981	0.000864758	0.0332046	0.162812	sp|Q8BG05|ROA3_MOUSE Heterogeneous nuclear ribonucleoprotein A3 OS=Mus musculus OX=10090 GN=Hnrnpa3 PE=1 SV=1	FUNCTION: Plays a role in cytoplasmic trafficking of RNA. Binds to the cis-acting response element, A2RE. May be involved in pre-mRNA splicing (By similarity). {ECO:0000250}.	SUBCELLULAR LOCATION: Nucleus {ECO:0000250}. Note=Component of ribonucleosomes. {ECO:0000250}.		mRNA processing [GO:0006397]; mRNA transport [GO:0051028]; RNA splicing [GO:0008380]	mRNA binding [GO:0003729]; RNA transmembrane transporter activity [GO:0051033]	cytoplasm [GO:0005737]; messenger ribonucleoprotein complex [GO:1990124]; neuron projection [GO:0043005]; nucleus [GO:0005634]; postsynaptic density [GO:0014069]; ribonucleoprotein granule [GO:0035770]; spliceosomal complex [GO:0005681]	GO:0003729; GO:0005634; GO:0005681; GO:0005737; GO:0006397; GO:0008380; GO:0014069; GO:0035770; GO:0043005; GO:0051028; GO:0051033; GO:1990124	R-MMU-72163;R-MMU-72203;	mmu:229279;	16.7561	16.741	16.7671	16.7189	16.8255	16.5605	16.5743	16.6035	16.6145	16.6418
Plg_P20918	0.650323	1.9541	0.362163	0.25254	0.787556	-0.327453	-0.961548	-0.375462	-1.05364	-1.28858	Plg	Plasminogen;Plasmin heavy chain A;Activation peptide;Angiostatin;Plasmin heavy chain A, short form;Plasmin light chain B	P20918	1.01658	0.000886105	0.0332046	0.300224	sp|P20918|PLMN_MOUSE Plasminogen OS=Mus musculus OX=10090 GN=Plg PE=1 SV=3	FUNCTION: Plasmin dissolves the fibrin of blood clots and acts as a proteolytic factor in a variety of other processes including embryonic development, tissue remodeling, tumor invasion, and inflammation. In ovulation, weakens the walls of the Graafian follicle. It activates the urokinase-type plasminogen activator, collagenases and several complement zymogens, such as C1 and C5. Cleavage of fibr…	SUBCELLULAR LOCATION: Secreted {ECO:0000250}. Note=Locates to the cell surface where it is proteolytically cleaved to produce the active plasmin. Interaction with HRG tethers it to the cell surface (By similarity). {ECO:0000250}.		blood coagulation [GO:0007596]; extracellular matrix disassembly [GO:0022617]; fibrinolysis [GO:0042730]; interaction with symbiont [GO:0051702]; labyrinthine layer blood vessel development [GO:0060716]; mononuclear cell migration [GO:0071674]; muscle cell cellular homeostasis [GO:0046716]; myoblast differentiation [GO:0045445]; negative regulation of angiogenesis [GO:0016525]; negative regulatio…	apolipoprotein binding [GO:0034185]; chaperone binding [GO:0051087]; endopeptidase activity [GO:0004175]; enzyme binding [GO:0019899]; kinase binding [GO:0019900]; protein antigen binding [GO:1990405]; protein domain specific binding [GO:0019904]; serine-type endopeptidase activity [GO:0004252]; signaling receptor binding [GO:0005102]	cell surface [GO:0009986]; collagen-containing extracellular matrix [GO:0062023]; extracellular region [GO:0005576]; extracellular space [GO:0005615]; extrinsic component of external side of plasma membrane [GO:0031232]; extrinsic component of plasma membrane [GO:0019897]; glutamatergic synapse [GO:0098978]; intracellular membrane-bounded organelle [GO:0043231]; plasma membrane [GO:0005886]; Scha…	GO:0004175; GO:0004252; GO:0005102; GO:0005576; GO:0005615; GO:0005886; GO:0006508; GO:0007596; GO:0009986; GO:0010812; GO:0016525; GO:0019897; GO:0019899; GO:0019900; GO:0019904; GO:0022617; GO:0031232; GO:0034185; GO:0042246; GO:0042730; GO:0043231; GO:0043536; GO:0045445; GO:0046716; GO:0048771; GO:0051087; GO:0051603; GO:0051702; GO:0051918; GO:0051919; GO:0060707; GO:0060716; GO:0062023; GO:…	R-MMU-114608;R-MMU-1474228;R-MMU-1592389;R-MMU-186797;R-MMU-75205;R-MMU-8964041;	mmu:18815;	18.3814	18.6256	18.3274	18.3069	18.4071	18.1982	18.0794	18.1892	18.0622	18.0182
Alg9_Q8VDI9	1.0704	1.03194	1.56459	0.0251292	0.528427	-0.939687	-1.23654	-1.06753	-0.616549	-0.360178	Alg9	Alpha-1,2-mannosyltransferase ALG9	Q8VDI9	1.0145	0.00089424	0.0332046	0.193562	sp|Q8VDI9|ALG9_MOUSE Alpha-1,2-mannosyltransferase ALG9 OS=Mus musculus OX=10090 GN=Alg9 PE=2 SV=1	FUNCTION: Catalyzes the transfer of mannose from Dol-P-Man to lipid-linked oligosaccharides. {ECO:0000250|UniProtKB:Q9H6U8}.	SUBCELLULAR LOCATION: Endoplasmic reticulum membrane {ECO:0000250|UniProtKB:Q9H6U8}; Multi-pass membrane protein {ECO:0000250|UniProtKB:Q9H6U8}.		protein N-linked glycosylation [GO:0006487]	alpha-1,2-mannosyltransferase activity [GO:0000026]; dol-P-Man:Man(6)GlcNAc(2)-PP-Dol alpha-1,2-mannosyltransferase activity [GO:0052926]; dol-P-Man:Man(8)GlcNAc(2)-PP-Dol alpha-1,2-mannosyltransferase activity [GO:0052918]; mannosyltransferase activity [GO:0000030]	endoplasmic reticulum [GO:0005783]; endoplasmic reticulum membrane [GO:0005789]; integral component of membrane [GO:0016021]	GO:0000026; GO:0000030; GO:0005783; GO:0005789; GO:0006487; GO:0016021; GO:0052918; GO:0052926	R-MMU-446193;	mmu:102580;	13.5716	13.5672	13.6283	13.4518	13.5095	13.3412	13.3071	13.3265	13.3782	13.4076
Puf60_Q3UEB3	0.287875	0.356917	1.27137	1.12939	0.911557	-1.65613	-0.70777	-1.30888	-0.328714	0.044403	Puf60	Poly(U)-binding-splicing factor PUF60	Q3UEB3	1.02421	0.000900291	0.0332046	0.367791	sp|Q3UEB3|PUF60_MOUSE Poly(U)-binding-splicing factor PUF60 OS=Mus musculus OX=10090 GN=Puf60 PE=1 SV=2	FUNCTION: DNA- and RNA-binding protein, involved in several nuclear processes such as pre-mRNA splicing, apoptosis and transcription regulation. In association with FUBP1 regulates MYC transcription at the P2 promoter through the core-TFIIH basal transcription factor. Acts as a transcriptional repressor through the core-TFIIH basal transcription factor. Represses FUBP1-induced transcriptional act…	SUBCELLULAR LOCATION: Nucleus. Note=Colocalizes partially with TROVE2. {ECO:0000250}.		alternative mRNA splicing, via spliceosome [GO:0000380]; apoptotic process [GO:0006915]; mRNA splice site selection [GO:0006376]; regulation of alternative mRNA splicing, via spliceosome [GO:0000381]	DNA binding [GO:0003677]; identical protein binding [GO:0042802]; RNA binding [GO:0003723]	cell junction [GO:0030054]; nucleoplasm [GO:0005654]	GO:0000380; GO:0000381; GO:0003677; GO:0003723; GO:0005654; GO:0006376; GO:0006915; GO:0030054; GO:0042802	R-MMU-72163;	mmu:67959;	15.4443	15.4604	15.6729	15.6399	15.5893	14.9926	15.213	15.0733	15.3011	15.3878
Dstn_Q9R0P5	-0.148829	1.02605	1.28372	0.949298	0.981783	-1.22762	-1.21561	-0.687544	-0.976925	0.0156725	Dstn	Destrin	Q9R0P5	1.01494	0.000901026	0.0332046	0.236945	sp|Q9R0P5|DEST_MOUSE Destrin OS=Mus musculus OX=10090 GN=Dstn PE=1 SV=3	FUNCTION: Actin-depolymerizing protein. Severs actin filaments (F-actin) and binds to actin monomers (G-actin). Acts in a pH-independent manner.			actin filament depolymerization [GO:0030042]; actin filament fragmentation [GO:0030043]; actin filament severing [GO:0051014]; cell motility [GO:0048870]; positive regulation of actin filament depolymerization [GO:0030836]	actin filament binding [GO:0051015]	actin cytoskeleton [GO:0015629]; cortical actin cytoskeleton [GO:0030864]; cytoplasm [GO:0005737]	GO:0005737; GO:0015629; GO:0030042; GO:0030043; GO:0030836; GO:0030864; GO:0048870; GO:0051014; GO:0051015		mmu:56431;	15.9532	16.1233	16.1606	16.1121	16.1168	15.797	15.7988	15.8752	15.8333	15.977
F12_Q80YC5	0.763552	1.06329	1.04781	0.931023	0.122466	-1.28386	-1.77285	0.0355312	-0.226712	-0.680257	F12	Coagulation factor XII;Coagulation factor XIIa heavy chain;Coagulation factor XIIa light chain	Q80YC5	1.0369	0.000903178	0.0332046	0.44421	sp|Q80YC5|FA12_MOUSE Coagulation factor XII OS=Mus musculus OX=10090 GN=F12 PE=1 SV=2	FUNCTION: Factor XII is a serum glycoprotein that participates in the initiation of blood coagulation, fibrinolysis, and the generation of bradykinin and angiotensin. Prekallikrein is cleaved by factor XII to form kallikrein, which then cleaves factor XII first to alpha-factor XIIa and then trypsin cleaves it to beta-factor XIIa. Alpha-factor XIIa activates factor XI to factor XIa (By similarity)…	SUBCELLULAR LOCATION: Secreted {ECO:0000250}.		blood coagulation [GO:0007596]; Factor XII activation [GO:0002542]; fibrinolysis [GO:0042730]; plasma kallikrein-kinin cascade [GO:0002353]; positive regulation of blood coagulation [GO:0030194]; positive regulation of fibrinolysis [GO:0051919]; positive regulation of plasminogen activation [GO:0010756]; protein autoprocessing [GO:0016540]; protein processing [GO:0016485]; proteolysis [GO:0006508…	calcium ion binding [GO:0005509]; peptidase activity [GO:0008233]; serine-type endopeptidase activity [GO:0004252]	extracellular space [GO:0005615]; rough endoplasmic reticulum [GO:0005791]	GO:0002353; GO:0002542; GO:0004252; GO:0005509; GO:0005615; GO:0005791; GO:0006508; GO:0007596; GO:0008233; GO:0010756; GO:0016485; GO:0016540; GO:0030194; GO:0031638; GO:0042730; GO:0051788; GO:0051919	R-MMU-140837;	mmu:58992;	12.4773	12.562	12.5577	12.5247	12.2961	11.8985	11.7602	12.2715	12.1973	12.0691
Tbc1d20_Q9D9I4	0.940187	0.339767	1.72529	0.702754	0.210965	-0.770608	-0.300367	-0.19689	-1.67813	-0.972965	Tbc1d20	TBC1 domain family member 20	Q9D9I4	1.04033	0.000911918	0.0332126	0.473859	sp|Q9D9I4|TBC20_MOUSE TBC1 domain family member 20 OS=Mus musculus OX=10090 GN=Tbc1d20 PE=1 SV=1	FUNCTION: GTPase-activating protein specific for Rab1 and Rab2 small GTPase families for which it can accelerate the intrinsic GTP hydrolysis rate by more than five orders of magnitude. {ECO:0000250}.	SUBCELLULAR LOCATION: Membrane {ECO:0000305}; Multi-pass membrane protein {ECO:0000305}.	DISEASE: Note=Defects in Tbc1d20 are the cause of spontaneous autosomal recessive blind sterile (bs) phenotype. Bs animals exhibit embryonic non-progressive nuclear cataracts and spermatid abnormalities associated with male infertility.	acrosome assembly [GO:0001675]; camera-type eye development [GO:0043010]; COPII-coated vesicle cargo loading [GO:0090110]; endoplasmic reticulum to Golgi vesicle-mediated transport [GO:0006888]; Golgi organization [GO:0007030]; lens development in camera-type eye [GO:0002088]; lens fiber cell morphogenesis [GO:0070309]; lipid droplet organization [GO:0034389]; male gonad development [GO:0008584];…	GTPase activator activity [GO:0005096]; Rab GTPase binding [GO:0017137]	endoplasmic reticulum [GO:0005783]; endoplasmic reticulum membrane [GO:0005789]; integral component of Golgi membrane [GO:0030173]; nuclear membrane [GO:0031965]	GO:0001675; GO:0002088; GO:0005096; GO:0005783; GO:0005789; GO:0006888; GO:0007030; GO:0007283; GO:0008584; GO:0017137; GO:0019068; GO:0030173; GO:0031965; GO:0034389; GO:0043010; GO:0043547; GO:0044829; GO:0046726; GO:0070309; GO:0072520; GO:0090110; GO:1902953	R-MMU-204005;	mmu:67231;	12.2705	12.089	12.5078	12.1987	12.05	11.7533	11.8955	11.9268	11.479	11.6922
Abcb9_Q9JJ59	0.6439	1.48162	1.31025	0.819064	-0.37269	-1.05469	-1.00443	-1.17866	-0.0523453	-0.592013	Abcb9	ATP-binding cassette sub-family B member 9	Q9JJ59	1.06008	0.000929666	0.0335454	0.781921	sp|Q9JJ59|ABCB9_MOUSE ATP-binding cassette sub-family B member 9 OS=Mus musculus OX=10090 GN=Abcb9 PE=2 SV=1	FUNCTION: ATP-dependent low-affinity peptide transporter which translocates a broad spectrum of peptides from the cytosol to the lysosomal lumen. Displays a broad peptide length specificity from 6-mer up to at least 59-mer peptides with an optimum of 23-mers. Favors positively charged, aromatic or hydrophobic residues in the N- and C-terminal positions whereas negatively charged residues as well …	SUBCELLULAR LOCATION: Lysosome membrane {ECO:0000250}; Multi-pass membrane protein {ECO:0000255|PROSITE-ProRule:PRU00441}. Note=May be located in membrane rafts. {ECO:0000250}.		antigen processing and presentation of endogenous peptide antigen via MHC class I [GO:0019885]; peptide transport [GO:0015833]; protein transport [GO:0015031]; transmembrane transport [GO:0055085]	ATPase activity [GO:0016887]; ATPase-coupled peptide antigen transmembrane transporter activity [GO:0015433]; ATPase-coupled peptide transmembrane transporter activity [GO:0015440]; ATPase-coupled transmembrane transporter activity [GO:0042626]; ATP binding [GO:0005524]; protein homodimerization activity [GO:0042803]; TAP1 binding [GO:0046978]; transmembrane transporter activity [GO:0022857]	endoplasmic reticulum membrane [GO:0005789]; integral component of endoplasmic reticulum membrane [GO:0030176]; integral component of membrane [GO:0016021]; intracellular membrane-bounded organelle [GO:0043231]; lysosomal membrane [GO:0005765]; lysosome [GO:0005764]; MHC class I peptide loading complex [GO:0042824]	GO:0005524; GO:0005764; GO:0005765; GO:0005789; GO:0015031; GO:0015433; GO:0015440; GO:0015833; GO:0016021; GO:0016887; GO:0019885; GO:0022857; GO:0030176; GO:0042626; GO:0042803; GO:0042824; GO:0043231; GO:0046978; GO:0055085	R-MMU-382556;	mmu:56325;	13.729	14.1508	14.0645	13.8172	13.2171	12.8737	12.899	12.8113	13.3784	13.1067
Mydgf_Q9CPT4	-0.623666	1.19946	1.55057	0.868688	0.900805	-0.85428	-1.00254	-0.795847	-0.796233	-0.446949	Mydgf	Myeloid-derived growth factor	Q9CPT4	1.03695	0.000945266	0.0337954	0.57083	sp|Q9CPT4|MYDGF_MOUSE Myeloid-derived growth factor OS=Mus musculus OX=10090 GN=Mydgf PE=1 SV=1	FUNCTION: Bone marrow-derived monocyte and paracrine-acting protein that promotes cardiac myocyte survival and adaptive angiogenesis for cardiac protection and/or repair after myocardial infarction (MI). Stimulates endothelial cell proliferation through a MAPK1/3-, STAT3- and CCND1-mediated signaling pathway. Inhibits cardiac myocyte apoptosis in a PI3K/AKT-dependent signaling pathway. {ECO:00002…	SUBCELLULAR LOCATION: Secreted {ECO:0000269|PubMed:15378209, ECO:0000269|PubMed:25581518}. Endoplasmic reticulum-Golgi intermediate compartment {ECO:0000250|UniProtKB:Q969H8}. Endoplasmic reticulum {ECO:0000250|UniProtKB:Q969H8}. Golgi apparatus {ECO:0000250|UniProtKB:Q969H8}. Note=The C-terminal RTEL motif may provide retention in the endoplasmic reticulum. {ECO:0000250|UniProtKB:Q969H8}.		angiogenesis [GO:0001525]; apoptotic process [GO:0006915]; negative regulation of apoptotic process [GO:0043066]; positive regulation of angiogenesis [GO:0045766]; positive regulation of endothelial cell proliferation [GO:0001938]; positive regulation of MAPK cascade [GO:0043410]; positive regulation of phosphatidylinositol 3-kinase signaling [GO:0014068]; positive regulation of protein kinase B …		endoplasmic reticulum [GO:0005783]; endoplasmic reticulum-Golgi intermediate compartment [GO:0005793]; extracellular region [GO:0005576]; extracellular space [GO:0005615]; Golgi apparatus [GO:0005794]	GO:0001525; GO:0001934; GO:0001938; GO:0005576; GO:0005615; GO:0005783; GO:0005793; GO:0005794; GO:0006915; GO:0014068; GO:0043066; GO:0043410; GO:0045766; GO:0045944; GO:0051897		mmu:28106;	15.5075	16.1753	16.3039	16.0541	16.0659	15.423	15.3687	15.4444	15.4443	15.5722
Rhog_P84096	-0.0927956	0.250824	1.09115	1.92504	0.800613	-0.96968	-0.845117	-0.755529	-1.00182	-0.402681	Rhog	Rho-related GTP-binding protein RhoG	P84096	1.02103	0.000966815	0.033998	0.317209	sp|P84096|RHOG_MOUSE Rho-related GTP-binding protein RhoG OS=Mus musculus OX=10090 GN=Rhog PE=1 SV=1	FUNCTION: Required for the formation of membrane ruffles during macropinocytosis. Plays a role in cell migration and is required for the formation of cup-like structures during trans-endothelial migration of leukocytes (By similarity). {ECO:0000250}.	SUBCELLULAR LOCATION: Cell membrane {ECO:0000305}; Lipid-anchor {ECO:0000305}; Cytoplasmic side {ECO:0000305}.		actin cytoskeleton organization [GO:0030036]; actin filament organization [GO:0007015]; activation of GTPase activity [GO:0090630]; cell chemotaxis [GO:0060326]; cell projection assembly [GO:0030031]; cortical cytoskeleton organization [GO:0030865]; engulfment of apoptotic cell [GO:0043652]; establishment or maintenance of cell polarity [GO:0007163]; motor neuron axon guidance [GO:0008045]; posit…	GTPase activity [GO:0003924]; GTP binding [GO:0005525]; protein kinase binding [GO:0019901]	cell cortex [GO:0005938]; cell projection [GO:0042995]; cytoplasm [GO:0005737]; cytoplasmic vesicle [GO:0031410]; cytoskeleton [GO:0005856]; intracellular membrane-bounded organelle [GO:0043231]; plasma membrane [GO:0005886]; vesicle [GO:0031982]	GO:0003924; GO:0005525; GO:0005737; GO:0005856; GO:0005886; GO:0005938; GO:0007015; GO:0007163; GO:0007266; GO:0008045; GO:0008360; GO:0016601; GO:0019901; GO:0030031; GO:0030036; GO:0030865; GO:0031410; GO:0031982; GO:0032956; GO:0042995; GO:0043231; GO:0043652; GO:0045893; GO:0060326; GO:0090630; GO:1900027; GO:1902622; GO:1903078	R-MMU-114604;R-MMU-1257604;R-MMU-194840;R-MMU-5625970;R-MMU-6798695;R-MMU-6811558;	mmu:56212;	15.2212	15.2898	15.4574	15.6238	15.3995	15.0463	15.0711	15.089	15.0398	15.1594
Romo1_P60603	0.93008	0.734196	0.742331	0.929866	0.900483	-1.26168	-1.07148	-0.444295	-1.55648	0.0969766	Romo1	Reactive oxygen species modulator 1	P60603	1.01165	0.000974243	0.033998	0.185285	sp|P60603|ROMO1_MOUSE Reactive oxygen species modulator 1 OS=Mus musculus OX=10090 GN=Romo1 PE=2 SV=1	FUNCTION: Has antibacterial activity against a variety of bacteria including S.aureus, P.aeruginosa and M.tuberculosis. Acts by inducing bacterial membrane breakage (By similarity). {ECO:0000250}.; FUNCTION: Induces production of reactive oxygen species (ROS) which are necessary for cell proliferation. May play a role in inducing oxidative DNA damage and replicative senescence. May play a role in…	SUBCELLULAR LOCATION: Mitochondrion inner membrane {ECO:0000250}; Single-pass membrane protein {ECO:0000250}.		antimicrobial humoral immune response mediated by antimicrobial peptide [GO:0061844]; cellular response to reactive oxygen species [GO:0034614]; cytolysis by host of symbiont cells [GO:0051838]; defense response to bacterium [GO:0042742]; defense response to Gram-negative bacterium [GO:0050829]; defense response to Gram-positive bacterium [GO:0050830]; killing of cells of other organism [GO:00316…		integral component of membrane [GO:0016021]; mitochondrion [GO:0005739]; TIM23 mitochondrial import inner membrane translocase complex [GO:0005744]	GO:0005739; GO:0005744; GO:0008284; GO:0016021; GO:0030150; GO:0031640; GO:0034614; GO:0042742; GO:0045039; GO:0050829; GO:0050830; GO:0051838; GO:0061844; GO:0090399; GO:2000379		mmu:67067;	16.0928	16.0713	16.0722	16.0927	16.0895	15.8531	15.8739	15.9425	15.8209	16.0017
Ces1c_P23953	0.572885	0.780395	0.989448	0.809048	1.00768	-1.04118	-1.56866	-1.2091	-0.58809	0.247575	Ces1c	Carboxylesterase 1C	P23953	1.01163	0.000981355	0.033998	0.204208	sp|P23953|EST1C_MOUSE Carboxylesterase 1C OS=Mus musculus OX=10090 GN=Ces1c PE=1 SV=4	FUNCTION: Involved in the detoxification of xenobiotics and in the activation of ester and amide prodrugs. Involved in the extracellular metabolism of lung surfactant.	SUBCELLULAR LOCATION: Endoplasmic reticulum lumen. Note=Microsomal membrane, lumen of endoplasmic reticulum.		lipid catabolic process [GO:0016042]; response to bacterium [GO:0009617]	carboxylic ester hydrolase activity [GO:0052689]; hydrolase activity, acting on ester bonds [GO:0016788]; methyl indole-3-acetate esterase activity [GO:0080030]; sterol esterase activity [GO:0004771]; triglyceride lipase activity [GO:0004806]	endoplasmic reticulum lumen [GO:0005788]; extracellular space [GO:0005615]	GO:0004771; GO:0004806; GO:0005615; GO:0005788; GO:0009617; GO:0016042; GO:0016788; GO:0052689; GO:0080030		mmu:13884;	17.7249	17.7504	17.776	17.7539	17.7783	17.5268	17.4621	17.5062	17.5824	17.685
Gbp2_Q9Z0E6	-0.368851	0.736258	1.27867	1.27943	0.99736	-1.00939	-0.323646	-0.932795	-0.241735	-1.41529	Gbp2	Interferon-induced guanylate-binding protein 2	Q9Z0E6	1.0253	0.000990566	0.033998	0.405411	sp|Q9Z0E6|GBP2_MOUSE Guanylate-binding protein 2 OS=Mus musculus OX=10090 GN=Gbp2 PE=1 SV=1	FUNCTION: Hydrolyzes GTP to GMP in 2 consecutive cleavage reactions, but the major reaction product is GDP (By similarity). Exhibits antiviral activity against influenza virus. Promotes oxidative killing and delivers antimicrobial peptides to autophagolysosomes, providing broad host protection against different pathogen classes (By similarity). {ECO:0000250|UniProtKB:P32455, ECO:0000250|UniProtKB…	SUBCELLULAR LOCATION: Cytoplasm {ECO:0000250|UniProtKB:P32456}. Cytoplasm, perinuclear region {ECO:0000250|UniProtKB:P32456}. Golgi apparatus membrane {ECO:0000250|UniProtKB:P32456}. Membrane {ECO:0000250|UniProtKB:P32456}; Lipid-anchor {ECO:0000250|UniProtKB:P32456}. Note=GBP2-GBP5 dimers localize to the Golgi apparatus. {ECO:0000250|UniProtKB:P32456}.		adhesion of symbiont to host [GO:0044406]; cellular response to interferon-beta [GO:0035458]; cellular response to interferon-gamma [GO:0071346]; cellular response to lipopolysaccharide [GO:0071222]; defense response to Gram-positive bacterium [GO:0050830]; defense response to protozoan [GO:0042832]; protein localization to nucleus [GO:0034504]; response to bacterium [GO:0009617]	GTPase activity [GO:0003924]; GTP binding [GO:0005525]; protein homodimerization activity [GO:0042803]	actin cytoskeleton [GO:0015629]; cytoplasm [GO:0005737]; cytoplasmic vesicle [GO:0031410]; cytosol [GO:0005829]; Golgi apparatus [GO:0005794]; Golgi membrane [GO:0000139]; nucleoplasm [GO:0005654]; nucleus [GO:0005634]; perinuclear region of cytoplasm [GO:0048471]; symbiont-containing vacuole membrane [GO:0020005]	GO:0000139; GO:0003924; GO:0005525; GO:0005634; GO:0005654; GO:0005737; GO:0005794; GO:0005829; GO:0009617; GO:0015629; GO:0020005; GO:0031410; GO:0034504; GO:0035458; GO:0042803; GO:0042832; GO:0044406; GO:0048471; GO:0050830; GO:0071222; GO:0071346		mmu:14469;	16.1323	16.4179	16.558	16.5582	16.4853	15.9668	16.144	15.9866	16.1652	15.862
Nono_Q99K48	0.402988	0.14483	1.26651	1.74958	0.613991	-1.03112	-1.11118	-0.927446	-0.519072	-0.589084	Nono	Non-POU domain-containing octamer-binding protein	Q99K48	1.01203	0.000997021	0.033998	0.197976	sp|Q99K48|NONO_MOUSE Non-POU domain-containing octamer-binding protein OS=Mus musculus OX=10090 GN=Nono PE=1 SV=3	FUNCTION: DNA- and RNA binding protein, involved in several nuclear processes. Binds the conventional octamer sequence in double-stranded DNA. Also binds single-stranded DNA and RNA at a site independent of the duplex site. Involved in pre-mRNA splicing, probably as a heterodimer with SFPQ. Interacts with U5 snRNA, probably by binding to a purine-rich sequence located on the 3' side of U5 snRNA s…	SUBCELLULAR LOCATION: Nucleus {ECO:0000269|PubMed:15860628, ECO:0000269|PubMed:26571461}. Nucleus, nucleolus {ECO:0000250}. Nucleus speckle {ECO:0000250}. Note=Detected in punctate subnuclear structures often located adjacent to splicing speckles, called paraspeckles. {ECO:0000250}.		activation of innate immune response [GO:0002218]; circadian rhythm [GO:0007623]; DNA recombination [GO:0006310]; DNA repair [GO:0006281]; innate immune response [GO:0045087]; mRNA splicing, via spliceosome [GO:0000398]; negative regulation of oxidative stress-induced neuron intrinsic apoptotic signaling pathway [GO:1903377]; negative regulation of transcription, DNA-templated [GO:0045892]; regul…	chromatin binding [GO:0003682]; identical protein binding [GO:0042802]; nucleic acid binding [GO:0003676]; RNA binding [GO:0003723]; transcription regulatory region sequence-specific DNA binding [GO:0000976]	fibrillar center [GO:0001650]; nuclear matrix [GO:0016363]; nuclear speck [GO:0016607]; nucleoplasm [GO:0005654]; nucleus [GO:0005634]; paraspeckles [GO:0042382]; RNA polymerase II transcription regulator complex [GO:0090575]	GO:0000398; GO:0000976; GO:0001650; GO:0002218; GO:0003676; GO:0003682; GO:0003723; GO:0005634; GO:0005654; GO:0006281; GO:0006310; GO:0006355; GO:0007623; GO:0016363; GO:0016607; GO:0042382; GO:0042752; GO:0042802; GO:0045087; GO:0045892; GO:0090575; GO:1903377		mmu:53610;	16.6044	16.5738	16.7067	16.764	16.6294	16.4345	16.425	16.4468	16.4952	16.4869
Lamp2_P17047	0.233449	1.27895	1.1411	0.497918	0.831235	-1.10085	-1.7773	-0.808846	-0.13834	-0.157313	Lamp2	Lysosome-associated membrane glycoprotein 2	P17047	1.02045	0.00100846	0.033998	0.298308	sp|P17047|LAMP2_MOUSE Lysosome-associated membrane glycoprotein 2 OS=Mus musculus OX=10090 GN=Lamp2 PE=1 SV=2	FUNCTION: Plays an important role in chaperone-mediated autophagy, a process that mediates lysosomal degradation of proteins in response to various stresses and as part of the normal turnover of proteins with a long biological half-live (PubMed:10972293). Functions by binding target proteins, such as GAPDH and MLLT11, and targeting them for lysosomal degradation (By similarity). Required for the …	SUBCELLULAR LOCATION: Cell membrane {ECO:0000250|UniProtKB:P13473}; Single-pass type I membrane protein {ECO:0000255|PROSITE-ProRule:PRU00740}. Endosome membrane {ECO:0000250|UniProtKB:P13473}; Single-pass type I membrane protein {ECO:0000255|PROSITE-ProRule:PRU00740}. Cytoplasmic vesicle, autophagosome membrane {ECO:0000269|PubMed:12221139}. Lysosome membrane {ECO:0000269|PubMed:11082038, ECO:00…		autophagosome maturation [GO:0097352]; autophagy [GO:0006914]; cellular response to starvation [GO:0009267]; chaperone-mediated autophagy [GO:0061684]; establishment of protein localization to organelle [GO:0072594]; lysosomal protein catabolic process [GO:1905146]; muscle cell cellular homeostasis [GO:0046716]; negative regulation of protein-containing complex assembly [GO:0031333]; protein stab…	enzyme binding [GO:0019899]; protein domain specific binding [GO:0019904]	autolysosome [GO:0044754]; chaperone-mediated autophagy translocation complex [GO:0061742]; endosome [GO:0005768]; extracellular exosome [GO:0070062]; extracellular space [GO:0005615]; integral component of autophagosome membrane [GO:0097637]; late endosome [GO:0005770]; late endosome membrane [GO:0031902]; lysosomal matrix [GO:1990836]; lysosomal membrane [GO:0005765]; lysosome [GO:0005764]; mem…	GO:0005615; GO:0005764; GO:0005765; GO:0005768; GO:0005770; GO:0005802; GO:0005886; GO:0006605; GO:0006914; GO:0009267; GO:0016020; GO:0019899; GO:0019904; GO:0030670; GO:0031088; GO:0031333; GO:0031647; GO:0031902; GO:0044754; GO:0046716; GO:0048471; GO:0050821; GO:0061684; GO:0061740; GO:0061742; GO:0070062; GO:0072594; GO:0097352; GO:0097637; GO:1905146; GO:1990836	R-MMU-114608;R-MMU-6798695;	mmu:16784;	14.7814	14.9771	14.9513	14.8309	14.8933	14.5315	14.4048	14.5862	14.7117	14.7082
Itih4_A6X935	0.183874	1.63979	1.47708	0.813101	-0.19914	-1.02086	-0.581075	-1.16414	-0.577199	-0.571433	Itih4	Inter alpha-trypsin inhibitor, heavy chain 4	A6X935	1.02552	0.001012	0.033998	0.417119	sp|A6X935|ITIH4_MOUSE Inter alpha-trypsin inhibitor, heavy chain 4 OS=Mus musculus OX=10090 GN=Itih4 PE=1 SV=2	FUNCTION: Type II acute-phase protein (APP) involved in inflammatory responses to trauma. May also play a role in liver development or regeneration.	SUBCELLULAR LOCATION: Secreted {ECO:0000250}.		acute-phase response [GO:0006953]; hyaluronan metabolic process [GO:0030212]	serine-type endopeptidase inhibitor activity [GO:0004867]	collagen-containing extracellular matrix [GO:0062023]; cytoplasm [GO:0005737]; plasma membrane [GO:0005886]	GO:0004867; GO:0005737; GO:0005886; GO:0006953; GO:0030212; GO:0062023	R-MMU-114608;	mmu:16427;	16.6031	16.9909	16.9476	16.7707	16.5011	16.2822	16.3993	16.244	16.4004	16.4019
_Q8BN57	-0.0522254	0.59543	0.811699	1.09195	1.56293	-0.799927	-0.439175	-1.43259	-1.20218	-0.135902		Protein C3orf33 homolog	Q8BN57	1.01988	0.001027	0.034207	0.270487	sp|Q8BN57|CC033_MOUSE Protein C3orf33 homolog OS=Mus musculus OX=10090 PE=2 SV=1	FUNCTION: May play a role in transcription regulation. {ECO:0000250}.	SUBCELLULAR LOCATION: Membrane {ECO:0000305}; Single-pass membrane protein {ECO:0000305}.		negative regulation of ERK1 and ERK2 cascade [GO:0070373]; regulation of DNA-binding transcription factor activity [GO:0051090]		extracellular space [GO:0005615]; integral component of membrane [GO:0016021]	GO:0005615; GO:0016021; GO:0051090; GO:0070373		mmu:329659;	13.7318	13.841	13.8775	13.9248	14.0042	13.6057	13.6666	13.499	13.5379	13.7177
Khsrp_Q3U0V1	-0.0175995	0.548864	1.01909	1.51634	1.10513	-0.740066	-1.14809	-0.604004	-1.33884	-0.34083	Khsrp	Far upstream element-binding protein 2	Q3U0V1	1.01184	0.00104922	0.0346509	0.196414	sp|Q3U0V1|FUBP2_MOUSE Far upstream element-binding protein 2 OS=Mus musculus OX=10090 GN=Khsrp PE=1 SV=2	FUNCTION: Binds to the dendritic targeting element and may play a role in mRNA trafficking. Part of a ternary complex that binds to the downstream control sequence (DCS) of the pre-mRNA. Mediates exon inclusion in transcripts that are subject to tissue-specific alternative splicing. May interact with single-stranded DNA from the far-upstream element (FUSE). May activate gene expression. Also invo…	SUBCELLULAR LOCATION: Nucleus {ECO:0000250}. Cytoplasm {ECO:0000250}. Note=A small proportion is also found in the cytoplasm of neuronal cell bodies and dendrites. {ECO:0000250}.		3'-UTR-mediated mRNA destabilization [GO:0061158]; cellular response to cytokine stimulus [GO:0071345]; miRNA metabolic process [GO:0010586]; mRNA catabolic process [GO:0006402]; mRNA processing [GO:0006397]; mRNA transport [GO:0051028]; negative regulation of low-density lipoprotein particle clearance [GO:0010989]; negative regulation of nitric oxide biosynthetic process [GO:0045019]; positive r…	DNA binding [GO:0003677]; mRNA 3'-UTR AU-rich region binding [GO:0035925]; mRNA 3'-UTR binding [GO:0003730]; mRNA binding [GO:0003729]	cytoplasm [GO:0005737]; cytoplasmic stress granule [GO:0010494]; cytosol [GO:0005829]; dendrite [GO:0030425]; neuronal cell body [GO:0043025]; nucleoplasm [GO:0005654]; nucleus [GO:0005634]	GO:0003677; GO:0003729; GO:0003730; GO:0005634; GO:0005654; GO:0005737; GO:0005829; GO:0006355; GO:0006397; GO:0006402; GO:0008380; GO:0010468; GO:0010494; GO:0010586; GO:0010989; GO:0030425; GO:0035925; GO:0043025; GO:0043488; GO:0045019; GO:0051028; GO:0061014; GO:0061158; GO:0071345; GO:2000628	R-MMU-450604;	mmu:16549;	16.679	16.7457	16.801	16.8595	16.8111	16.5939	16.5459	16.61	16.5235	16.6409
Mrpl10_Q3TBW2	1.04237	0.869361	0.0824917	0.803104	1.12231	-0.670296	-1.02863	-0.0402142	-1.91488	-0.265613	Mrpl10	39S ribosomal protein L10, mitochondrial	Q3TBW2	1.02699	0.00107549	0.0352201	0.373905	sp|Q3TBW2|RM10_MOUSE 39S ribosomal protein L10, mitochondrial OS=Mus musculus OX=10090 GN=Mrpl10 PE=1 SV=2		SUBCELLULAR LOCATION: Mitochondrion {ECO:0000250|UniProtKB:Q7Z7H8}.		ribosome biogenesis [GO:0042254]; translation [GO:0006412]	structural constituent of ribosome [GO:0003735]	large ribosomal subunit [GO:0015934]; mitochondrial large ribosomal subunit [GO:0005762]; mitochondrion [GO:0005739]; nucleoplasm [GO:0005654]; ribonucleoprotein complex [GO:1990904]	GO:0003735; GO:0005654; GO:0005739; GO:0005762; GO:0006412; GO:0015934; GO:0042254; GO:1990904	R-MMU-5389840;R-MMU-5419276;	mmu:107732;	14.2897	14.2484	14.0608	14.2326	14.3087	13.8812	13.7958	14.0315	13.5844	13.9777
Atp5s_Q9CRA7	-0.391007	1.17076	1.29691	1.05605	0.734815	-1.09533	-1.2294	-1.01408	0.0961781	-0.624886	Atp5s	ATP synthase subunit s, mitochondrial	Q9CRA7	1.04072	0.00109041	0.035411	0.582823	sp|Q9CRA7|ATP5S_MOUSE ATP synthase subunit s, mitochondrial OS=Mus musculus OX=10090 GN=Dmac2l PE=1 SV=1	FUNCTION: Involved in regulation of mitochondrial membrane ATP synthase. Necessary for H(+) conduction of ATP synthase. Facilitates energy-driven catalysis of ATP synthesis by blocking a proton leak through an alternative proton exit pathway. {ECO:0000250|UniProtKB:P22027}.	SUBCELLULAR LOCATION: Mitochondrion {ECO:0000250|UniProtKB:P22027}. Mitochondrion inner membrane {ECO:0000250|UniProtKB:P22027}.		ATP biosynthetic process [GO:0006754]; ion transport [GO:0006811]	metal ion binding [GO:0046872]	mitochondrial inner membrane [GO:0005743]; mitochondrion [GO:0005739]; proton-transporting ATP synthase complex, coupling factor F(o) [GO:0045263]	GO:0005739; GO:0005743; GO:0006754; GO:0006811; GO:0045263; GO:0046872	R-MMU-163210;R-MMU-8949613;	mmu:68055;	14.4586	15.047	15.0945	15.0038	14.8827	14.1932	14.1427	14.2239	14.6421	14.3705
Dus3l_Q91XI1	0.660233	1.37804	0.817598	0.786724	0.245226	-0.887939	-1.55466	-1.45321	-0.00862325	0.0166039	Dus3l	tRNA-dihydrouridine(47) synthase [NAD(P)(+)]-like	Q91XI1	1.0411	0.00112138	0.0358554	0.4402	sp|Q91XI1|DUS3L_MOUSE tRNA-dihydrouridine(47) synthase [NAD(P)(+)]-like OS=Mus musculus OX=10090 GN=Dus3l PE=1 SV=1	FUNCTION: Catalyzes the synthesis of dihydrouridine, a modified base found in the D-loop of most tRNAs. {ECO:0000250}.				flavin adenine dinucleotide binding [GO:0050660]; metal ion binding [GO:0046872]; tRNA dihydrouridine synthase activity [GO:0017150]		GO:0017150; GO:0046872; GO:0050660		mmu:224907;	11.1181	11.3213	11.1626	11.1539	11.0006	10.6799	10.4912	10.5199	10.9288	10.9359
Arl8b_Q9CQW2	0.347752	0.698468	0.439149	0.808445	1.75771	-1.26126	-0.887648	-1.12598	-0.891857	0.115219	Arl8b	ADP-ribosylation factor-like protein 8B	Q9CQW2	1.01481	0.00113771	0.0358554	0.232087	sp|Q9CQW2|ARL8B_MOUSE ADP-ribosylation factor-like protein 8B OS=Mus musculus OX=10090 GN=Arl8b PE=1 SV=1	FUNCTION: Plays a role in lysosome motility (PubMed:30174114). In neurons, mediates the anterograde axonal long-range transport of presynaptic lysosome-related vesicles required for presynaptic biogenesis and synaptic function (PubMed:30174114). May play a role in chromosome segregation (By similarity). {ECO:0000250|UniProtKB:Q9NVJ2, ECO:0000269|PubMed:30174114}.	SUBCELLULAR LOCATION: Late endosome membrane {ECO:0000250|UniProtKB:Q9NVJ2}. Lysosome membrane {ECO:0000269|PubMed:30174114}. Cytoplasm, cytoskeleton, spindle {ECO:0000250|UniProtKB:Q9NVJ2}. Cell projection, axon {ECO:0000269|PubMed:30174114}. Cell junction, synapse {ECO:0000269|PubMed:30174114}. Note=Localizes with microtubules at the spindle mid-zone during mitosis. {ECO:0000250|UniProtKB:Q9NVJ…		anterograde axonal transport [GO:0008089]; cell cycle [GO:0007049]; cell division [GO:0051301]; chromosome segregation [GO:0007059]; endosomal transport [GO:0016197]; lysosome localization [GO:0032418]; protein transport [GO:0015031]	alpha-tubulin binding [GO:0043014]; beta-tubulin binding [GO:0048487]; GDP binding [GO:0019003]; GTPase activity [GO:0003924]; GTP binding [GO:0005525]	axon [GO:0030424]; axon cytoplasm [GO:1904115]; cytoplasm [GO:0005737]; late endosome membrane [GO:0031902]; lysosomal membrane [GO:0005765]; midbody [GO:0030496]; spindle midzone [GO:0051233]; synapse [GO:0045202]; vacuolar membrane [GO:0005774]	GO:0003924; GO:0005525; GO:0005737; GO:0005765; GO:0005774; GO:0007049; GO:0007059; GO:0008089; GO:0015031; GO:0016197; GO:0019003; GO:0030424; GO:0030496; GO:0031902; GO:0032418; GO:0043014; GO:0045202; GO:0048487; GO:0051233; GO:0051301; GO:1904115		mmu:67166;	15.8384	15.8886	15.8515	15.9044	16.0403	15.608	15.6615	15.6274	15.6609	15.8051
Ptges3_Q9R0Q7	0.268677	1.11969	1.21964	0.87991	0.617708	0.0759698	-1.6757	-0.556114	-0.915926	-1.03385	Ptges3	Prostaglandin E synthase 3	Q9R0Q7	1.01339	0.00114146	0.0358554	0.210223	sp|Q9R0Q7|TEBP_MOUSE Prostaglandin E synthase 3 OS=Mus musculus OX=10090 GN=Ptges3 PE=1 SV=1	FUNCTION: Cytosolic prostaglandin synthase that catalyzes the oxidoreduction of prostaglandin endoperoxide H2 (PGH2) to prostaglandin E2 (PGE2). Molecular chaperone that localizes to genomic response elements in a hormone-dependent manner and disrupts receptor-mediated transcriptional activation, by promoting disassembly of transcriptional regulatory complexes. Facilitates HIF alpha proteins hydr…	SUBCELLULAR LOCATION: Cytoplasm {ECO:0000250|UniProtKB:Q3ZBF7}.		cell population proliferation [GO:0008283]; chaperone cofactor-dependent protein refolding [GO:0051085]; chaperone-mediated protein complex assembly [GO:0051131]; glucocorticoid receptor signaling pathway [GO:0042921]; glycogen biosynthetic process [GO:0005978]; lung saccule development [GO:0060430]; negative regulation of cell death [GO:0060548]; positive regulation of gene expression [GO:001062…	chaperone binding [GO:0051087]; DNA polymerase binding [GO:0070182]; enzyme binding [GO:0019899]; Hsp90 protein binding [GO:0051879]; p53 binding [GO:0002039]; prostaglandin-E synthase activity [GO:0050220]; telomerase activity [GO:0003720]; unfolded protein binding [GO:0051082]	actin filament [GO:0005884]; chaperone complex [GO:0101031]; cytoplasm [GO:0005737]; cytosol [GO:0005829]; intracellular membrane-bounded organelle [GO:0043231]; neuronal cell body [GO:0043025]; neuron projection [GO:0043005]; nucleus [GO:0005634]; perinuclear region of cytoplasm [GO:0048471]; protein-containing complex [GO:0032991]; telomerase holoenzyme complex [GO:0005697]	GO:0001516; GO:0002039; GO:0003720; GO:0005634; GO:0005697; GO:0005737; GO:0005829; GO:0005884; GO:0005978; GO:0006457; GO:0006693; GO:0007004; GO:0008283; GO:0010628; GO:0019233; GO:0019899; GO:0032991; GO:0042327; GO:0042921; GO:0043005; GO:0043025; GO:0043231; GO:0043588; GO:0048471; GO:0050220; GO:0050821; GO:0051082; GO:0051085; GO:0051087; GO:0051131; GO:0051879; GO:0051973; GO:0060430; GO:…	R-MMU-2162123;R-MMU-3371497;R-MMU-3371511;R-MMU-3371568;R-MMU-8937144;R-MMU-8939211;R-MMU-9018519;	mmu:56351;	15.8451	15.954	15.9668	15.9233	15.8898	15.8204	15.5962	15.7395	15.6935	15.6784
Fastkd2_Q922E6	-0.175202	0.726826	0.924286	0.986832	1.59998	-0.933968	-0.770994	-0.391233	-1.48303	-0.483502	Fastkd2	FAST kinase domain-containing protein 2	Q922E6	1.01471	0.00114977	0.0358554	0.225959	sp|Q922E6|FAKD2_MOUSE FAST kinase domain-containing protein 2, mitochondrial OS=Mus musculus OX=10090 GN=Fastkd2 PE=2 SV=2	FUNCTION: Plays an important role in assembly of the mitochondrial large ribosomal subunit. As a component of a functional protein-RNA module, consisting of RCC1L, NGRN, RPUSD3, RPUSD4, TRUB2, FASTKD2 and 16S mitochondrial ribosomal RNA (16S mt-rRNA), controls 16S mt-rRNA abundance and is required for intra-mitochondrial translation. {ECO:0000250|UniProtKB:Q9NYY8}.	SUBCELLULAR LOCATION: Mitochondrion matrix, mitochondrion nucleoid {ECO:0000250|UniProtKB:Q9NYY8}. Note=Localizes to mitochondrial RNA granules found in close proximity to the mitochondrial nucleoids. {ECO:0000250|UniProtKB:Q9NYY8}.		mitochondrial large ribosomal subunit assembly [GO:1902775]; positive regulation of mitochondrial translation [GO:0070131]; regulation of mitochondrial mRNA stability [GO:0044528]	rRNA binding [GO:0019843]	intercellular bridge [GO:0045171]; mitochondrial nucleoid [GO:0042645]; mitochondrion [GO:0005739]; nucleoplasm [GO:0005654]; ribonucleoprotein granule [GO:0035770]	GO:0005654; GO:0005739; GO:0019843; GO:0035770; GO:0042645; GO:0044528; GO:0045171; GO:0070131; GO:1902775		mmu:75619;	15.4452	15.5706	15.5981	15.6068	15.692	15.3397	15.3624	15.4152	15.2634	15.4024
Mylk_Q6PDN3	0.932203	0.112696	-0.0803306	1.59085	1.4389	-1.18962	-0.953076	-0.786732	-0.555985	-0.508901	Mylk	Myosin light chain kinase, smooth muscle;Myosin light chain kinase, smooth muscle, deglutamylated form	Q6PDN3	1.01575	0.0011501	0.0358554	0.264147	sp|Q6PDN3|MYLK_MOUSE Myosin light chain kinase, smooth muscle OS=Mus musculus OX=10090 GN=Mylk PE=1 SV=3	FUNCTION: Calcium/calmodulin-dependent myosin light chain kinase implicated in smooth muscle contraction via phosphorylation of myosin light chains (MLC). Also regulates actin-myosin interaction through a non-kinase activity. Phosphorylates PTK2B/PYK2 and myosin light-chains. Involved in the inflammatory response (e.g. apoptosis, vascular permeability, leukocyte diapedesis), cell motility and mor…	SUBCELLULAR LOCATION: Cytoplasm {ECO:0000269|PubMed:11832329}. Cell projection, lamellipodium {ECO:0000250|UniProtKB:Q15746}. Cleavage furrow {ECO:0000250|UniProtKB:Q15746}. Cytoplasm, cytoskeleton, stress fiber {ECO:0000269|PubMed:11832329}. Note=Localized to stress fibers during interphase and to the cleavage furrow during mitosis. {ECO:0000250|UniProtKB:Q15746}.; SUBCELLULAR LOCATION: [Isoform…		aorta smooth muscle tissue morphogenesis [GO:0060414]; bleb assembly [GO:0032060]; cellular hypotonic response [GO:0071476]; cellular response to calcium ion [GO:0071277]; cellular response to drug [GO:0035690]; cellular response to potassium ion [GO:0035865]; positive regulation of calcium ion transport [GO:0051928]; positive regulation of cell migration [GO:0030335]; positive regulation of woun…	actin binding [GO:0003779]; ATP binding [GO:0005524]; calmodulin binding [GO:0005516]; enzyme binding [GO:0019899]; metal ion binding [GO:0046872]; myosin light chain kinase activity [GO:0004687]; protein kinase activity [GO:0004672]	actin cytoskeleton [GO:0015629]; cell-cell junction [GO:0005911]; cleavage furrow [GO:0032154]; cytoplasm [GO:0005737]; lamellipodium [GO:0030027]; plasma membrane [GO:0005886]; stress fiber [GO:0001725]	GO:0001725; GO:0003779; GO:0004672; GO:0004687; GO:0005516; GO:0005524; GO:0005737; GO:0005886; GO:0005911; GO:0006939; GO:0014820; GO:0015629; GO:0019899; GO:0030027; GO:0030335; GO:0032060; GO:0032154; GO:0035690; GO:0035865; GO:0046872; GO:0051928; GO:0060414; GO:0071277; GO:0071476; GO:0090303	R-MMU-445355;R-MMU-5627123;		17.0591	16.9236	16.8917	17.1679	17.1428	16.7083	16.7474	16.7749	16.813	16.8208
Fetub_Q9QXC1	0.825216	0.450194	1.06733	0.451537	1.37413	-0.723	-1.40259	-0.831645	-1.30198	0.09081	Fetub	Fetuin-B	Q9QXC1	1.01241	0.00116676	0.0360557	0.190847	sp|Q9QXC1|FETUB_MOUSE Fetuin-B OS=Mus musculus OX=10090 GN=Fetub PE=1 SV=1	FUNCTION: Protease inhibitor required for egg fertilization. Required to prevent premature zona pellucida hardening before fertilization, probably by inhibiting the protease activity of ASTL, a protease that mediates the cleavage of ZP2 and triggers zona pellucida hardening. {ECO:0000269|PubMed:23562279}.	SUBCELLULAR LOCATION: Secreted {ECO:0000305|PubMed:23562279}.		binding of sperm to zona pellucida [GO:0007339]; negative regulation of endopeptidase activity [GO:0010951]; single fertilization [GO:0007338]	cysteine-type endopeptidase inhibitor activity [GO:0004869]; endopeptidase inhibitor activity [GO:0004866]; metalloendopeptidase inhibitor activity [GO:0008191]	extracellular region [GO:0005576]; extracellular space [GO:0005615]	GO:0004866; GO:0004869; GO:0005576; GO:0005615; GO:0007338; GO:0007339; GO:0008191; GO:0010951		mmu:59083;	15.5699	15.5269	15.5976	15.5271	15.6327	15.3927	15.3149	15.3802	15.3264	15.4858
Myef2_Q8C854	0.399236	0.231612	0.817585	1.3345	1.25043	-1.11775	-0.467364	-0.643105	-1.69737	-0.107772	Myef2	Myelin expression factor 2	Q8C854	1.01591	0.00117502	0.0360557	0.237488	sp|Q8C854|MYEF2_MOUSE Myelin expression factor 2 OS=Mus musculus OX=10090 GN=Myef2 PE=1 SV=1	FUNCTION: Transcriptional repressor of the myelin basic protein gene (MBP). Binds to the proximal MB1 element 5'-TTGTCC-3' of the MBP promoter. Its binding to MB1 and function are inhibited by PURA. {ECO:0000269|PubMed:7534248, ECO:0000269|PubMed:7539003, ECO:0000269|PubMed:9282330}.	SUBCELLULAR LOCATION: Nucleus.		negative regulation of transcription by RNA polymerase II [GO:0000122]; regulation of mRNA stability involved in response to oxidative stress [GO:2000815]	DNA-binding transcription repressor activity, RNA polymerase II-specific [GO:0001227]; mRNA binding [GO:0003729]; RNA polymerase II cis-regulatory region sequence-specific DNA binding [GO:0000978]; single-stranded DNA binding [GO:0003697]	cytoplasm [GO:0005737]; nucleus [GO:0005634]; post-mRNA release spliceosomal complex [GO:0071014]; ribonucleoprotein complex [GO:1990904]	GO:0000122; GO:0000978; GO:0001227; GO:0003697; GO:0003729; GO:0005634; GO:0005737; GO:0071014; GO:1990904; GO:2000815		mmu:17876;	15.1077	15.0831	15.1693	15.2454	15.233	14.8844	14.9802	14.9543	14.7991	15.0331
Huwe1_Q7TMY8	0.327184	0.237218	0.653174	1.29654	1.743	-0.964052	-0.846911	-0.690503	-0.992723	-0.76292	Huwe1	E3 ubiquitin-protein ligase HUWE1	Q7TMY8	1.01051	0.00118616	0.0360705	0.172261	sp|Q7TMY8|HUWE1_MOUSE E3 ubiquitin-protein ligase HUWE1 OS=Mus musculus OX=10090 GN=Huwe1 PE=1 SV=5	FUNCTION: E3 ubiquitin-protein ligase which mediates ubiquitination and subsequent proteasomal degradation of target proteins. Regulates apoptosis by catalyzing the polyubiquitination and degradation of MCL1. Mediates monoubiquitination of DNA polymerase beta (POLB) at 'Lys-41', 'Lys-61' and 'Lys-81', thereby playing a role in base-excision repair. Also ubiquitinates the p53/TP53 tumor suppressor…	SUBCELLULAR LOCATION: Cytoplasm {ECO:0000269|PubMed:17823942}. Nucleus {ECO:0000269|PubMed:17823942}. Note=Mainly expressed in the cytoplasm of most tissues, except in the nucleus of spermatogonia, primary spermatocytes and neuronal cells.		base-excision repair [GO:0006284]; cell differentiation [GO:0030154]; circadian regulation of gene expression [GO:0032922]; Golgi organization [GO:0007030]; histone ubiquitination [GO:0016574]; membrane fusion [GO:0061025]; negative regulation of mitochondrial fusion [GO:0010637]; positive regulation of mitophagy in response to mitochondrial depolarization [GO:0098779]; positive regulation of pro…	DNA binding [GO:0003677]; ubiquitin protein ligase activity [GO:0061630]; ubiquitin-protein transferase activity [GO:0004842]	cytoplasm [GO:0005737]; cytosol [GO:0005829]; Golgi membrane [GO:0000139]; nucleoplasm [GO:0005654]; nucleus [GO:0005634]	GO:0000139; GO:0000209; GO:0003677; GO:0004842; GO:0005634; GO:0005654; GO:0005737; GO:0005829; GO:0006284; GO:0006511; GO:0006513; GO:0007030; GO:0010637; GO:0016567; GO:0016574; GO:0030154; GO:0031398; GO:0032922; GO:0043161; GO:0045732; GO:0061025; GO:0061630; GO:0098779	R-MMU-6798695;R-MMU-983168;	mmu:59026;	16.5066	16.4975	16.5396	16.6047	16.6498	16.376	16.3878	16.4037	16.3731	16.3963
Tefm_Q5SSK3	0.906635	0.666156	0.48062	0.469976	1.47898	-1.14933	-0.799795	-0.393518	-1.72489	0.065169	Tefm	Transcription elongation factor, mitochondrial	Q5SSK3	1.0165	0.00119594	0.0360705	0.252935	sp|Q5SSK3|TEFM_MOUSE Transcription elongation factor, mitochondrial OS=Mus musculus OX=10090 GN=Tefm PE=1 SV=1	FUNCTION: Transcription elongation factor which increases mitochondrial RNA polymerase processivity. Regulates transcription of the mitochondrial genome, including genes important for the oxidative phosphorylation machinery (By similarity). {ECO:0000250}.	SUBCELLULAR LOCATION: Mitochondrion matrix {ECO:0000250}. Mitochondrion matrix, mitochondrion nucleoid {ECO:0000250}.		mitochondrial transcription [GO:0006390]; oxidative phosphorylation [GO:0006119]; transcription elongation from mitochondrial promoter [GO:0006392]	DNA polymerase processivity factor activity [GO:0030337]; nucleic acid binding [GO:0003676]	mitochondrial matrix [GO:0005759]; mitochondrial nucleoid [GO:0042645]; mitochondrion [GO:0005739]; ribonucleoprotein complex [GO:1990904]	GO:0003676; GO:0005739; GO:0005759; GO:0006119; GO:0006390; GO:0006392; GO:0030337; GO:0042645; GO:1990904		mmu:68550;	15.5958	15.5578	15.5285	15.5268	15.6862	15.271	15.3262	15.3904	15.18	15.4628
Cnst_Q8CBC4	-1.40281	-1.12283	0.436419	-1.34705	-0.481776	0.230834	0.999417	0.758662	0.813256	1.11588	Cnst	Consortin	Q8CBC4	1.0256	0.00120327	0.0360705	-0.334968	sp|Q8CBC4|CNST_MOUSE Consortin OS=Mus musculus OX=10090 GN=Cnst PE=1 SV=1	FUNCTION: Required for targeting of connexins to the plasma membrane. {ECO:0000250}.	SUBCELLULAR LOCATION: Cell membrane {ECO:0000250}; Single-pass membrane protein {ECO:0000250}. Golgi apparatus, trans-Golgi network membrane {ECO:0000250}; Single-pass membrane protein {ECO:0000250}. Cytoplasmic vesicle, secretory vesicle {ECO:0000250}. Note=Located predominantly in the trans-Golgi network. Probably trafficks between the trans-Golgi network and the cell membrane via the secretory…		negative regulation of phosphatase activity [GO:0010923]; positive regulation of Golgi to plasma membrane protein transport [GO:0042998]	connexin binding [GO:0071253]; phosphatase binding [GO:0019902]	integral component of membrane [GO:0016021]; intracellular membrane-bounded organelle [GO:0043231]; plasma membrane [GO:0005886]; protein-containing complex [GO:0032991]; trans-Golgi network [GO:0005802]; transport vesicle [GO:0030133]	GO:0005802; GO:0005886; GO:0010923; GO:0016021; GO:0019902; GO:0030133; GO:0032991; GO:0042998; GO:0043231; GO:0071253		mmu:226744;	12.95	13.0098	13.3431	12.9619	13.1469	13.2992	13.4634	13.412	13.4237	13.4883
Psip1_Q99JF8	0.333385	0.863594	1.29597	1.19807	0.261859	-1.43223	-0.715024	-0.337581	-1.51039	0.0423346	Psip1	PC4 and SFRS1-interacting protein	Q99JF8	1.02152	0.00123357	0.0366288	0.28613	sp|Q99JF8|PSIP1_MOUSE PC4 and SFRS1-interacting protein OS=Mus musculus OX=10090 GN=Psip1 PE=1 SV=1	FUNCTION: Transcriptional coactivator involved in neuroepithelial stem cell differentiation and neurogenesis. Involved in particular in lens epithelial cell gene regulation and stress responses. May play an important role in lens epithelial to fiber cell terminal differentiation. May play a protective role during stress-induced apoptosis (By similarity). {ECO:0000250|UniProtKB:O75475}.	SUBCELLULAR LOCATION: Nucleus {ECO:0000250|UniProtKB:O75475}.		mRNA 5'-splice site recognition [GO:0000395]; positive regulation of transcription by RNA polymerase II [GO:0045944]; regulation of transcription by RNA polymerase II [GO:0006357]; response to heat [GO:0009408]; response to oxidative stress [GO:0006979]	activating transcription factor binding [GO:0033613]; chromatin binding [GO:0003682]; double-stranded DNA binding [GO:0003690]; supercoiled DNA binding [GO:0097100]; transcription coactivator activity [GO:0003713]; transcription coregulator activity [GO:0003712]	nuclear chromatin [GO:0000790]; nuclear heterochromatin [GO:0005720]; nuclear periphery [GO:0034399]; nucleoplasm [GO:0005654]; nucleus [GO:0005634]; transcriptionally active chromatin [GO:0035327]	GO:0000395; GO:0000790; GO:0003682; GO:0003690; GO:0003712; GO:0003713; GO:0005634; GO:0005654; GO:0005720; GO:0006357; GO:0006979; GO:0009408; GO:0033613; GO:0034399; GO:0035327; GO:0045944; GO:0097100		mmu:101739;	13.5011	13.5971	13.6753	13.6576	13.4882	13.1816	13.3114	13.3797	13.1675	13.4484
Rasa4_Q6PFQ7	0.716277	0.374501	1.40976	0.875696	0.451227	0.378853	-1.31147	-1.49343	-0.305091	-1.09632	Rasa4	Ras GTPase-activating protein 4	Q6PFQ7	1.0818	0.00124119	0.0366288	0.788089	sp|Q6PFQ7|RASL2_MOUSE Ras GTPase-activating protein 4 OS=Mus musculus OX=10090 GN=Rasa4 PE=1 SV=1	FUNCTION: Ca(2+)-dependent Ras GTPase-activating protein, that switches off the Ras-MAPK pathway following a stimulus that elevates intracellular calcium. Functions as an adaptor for Cdc42 and Rac1 during FcR-mediated phagocytosis. Isoform 2 activates the Ras pathway and promotes RANKL shedding by modulating the expression of MMP14. {ECO:0000269|PubMed:16041389, ECO:0000269|PubMed:16234249}.	SUBCELLULAR LOCATION: Cytoplasm, cytosol. Cell membrane; Peripheral membrane protein. Note=Localized to the cytosol as a result of its lack of phosphoinositide binding activity. Upon agonist-stimulated calcium mobilization, utilizes the C2A and C2B domains to associate with the plasma membrane.		cellular response to calcium ion [GO:0071277]; intracellular signal transduction [GO:0035556]; negative regulation of GTPase activity [GO:0034260]; negative regulation of Ras protein signal transduction [GO:0046580]	GTPase activator activity [GO:0005096]; metal ion binding [GO:0046872]; phospholipid binding [GO:0005543]	cytosol [GO:0005829]; plasma membrane [GO:0005886]	GO:0005096; GO:0005543; GO:0005829; GO:0005886; GO:0034260; GO:0035556; GO:0046580; GO:0046872; GO:0071277	R-MMU-5658442;	mmu:54153;	10.3971	10.2211	10.7541	10.4791	10.2606	10.2234	9.35328	9.25961	9.87132	9.46402
Ssr4_Q62186	-0.419509	1.17402	1.30955	0.696505	1.20437	-0.221472	-0.761403	-1.31223	-0.993453	-0.676374	Ssr4	Translocon-associated protein subunit delta	Q62186	1.01953	0.00125388	0.0366288	0.272426	sp|Q62186|SSRD_MOUSE Translocon-associated protein subunit delta OS=Mus musculus OX=10090 GN=Ssr4 PE=1 SV=1	FUNCTION: TRAP proteins are part of a complex whose function is to bind calcium to the ER membrane and thereby regulate the retention of ER resident proteins. {ECO:0000250}.	SUBCELLULAR LOCATION: Endoplasmic reticulum membrane {ECO:0000250}; Single-pass type I membrane protein {ECO:0000250}.				endomembrane system [GO:0012505]; integral component of membrane [GO:0016021]; Sec61 translocon complex [GO:0005784]	GO:0005784; GO:0012505; GO:0016021		mmu:20832;	14.013	14.2867	14.31	14.2047	14.2919	14.047	13.9542	13.8596	13.9144	13.9688
Dcps_Q9DAR7	-0.189064	-0.748101	-0.716848	-1.51978	-0.677416	0.240932	1.41714	-0.151314	0.794981	1.54948	Dcps	m7GpppX diphosphatase	Q9DAR7	1.03529	0.0012595	0.0366288	-0.5016	sp|Q9DAR7|DCPS_MOUSE m7GpppX diphosphatase OS=Mus musculus OX=10090 GN=Dcps PE=1 SV=1	FUNCTION: Decapping scavenger enzyme that catalyzes the cleavage of a residual cap structure following the degradation of mRNAs by the 3'->5' exosome-mediated mRNA decay pathway. Hydrolyzes cap analog structures like 7-methylguanosine nucleoside triphosphate (m7GpppG) with up to 10 nucleotide substrates (small capped oligoribonucleotides) and specifically releases 5'-phosphorylated RNA fragments …	SUBCELLULAR LOCATION: Cytoplasm {ECO:0000250}. Nucleus {ECO:0000250}. Note=Predominantly localized in the nucleus. Nucleocytoplasmic shuttling protein that can transiently enter the cytoplasm in mammalian cells in a XPO1/CRM1-dependent manner. {ECO:0000250}.		cellular response to menadione [GO:0036245]; deadenylation-dependent decapping of nuclear-transcribed mRNA [GO:0000290]; mRNA cis splicing, via spliceosome [GO:0045292]; negative regulation of programmed cell death [GO:0043069]	identical protein binding [GO:0042802]; m7G(5')pppN diphosphatase activity [GO:0050072]; RNA 7-methylguanosine cap binding [GO:0000340]	cytoplasm [GO:0005737]; cytosol [GO:0005829]; mitochondrion [GO:0005739]; nucleoplasm [GO:0005654]; nucleus [GO:0005634]; P-body [GO:0000932]	GO:0000290; GO:0000340; GO:0000932; GO:0005634; GO:0005654; GO:0005737; GO:0005739; GO:0005829; GO:0036245; GO:0042802; GO:0043069; GO:0045292; GO:0050072	R-MMU-429958;	mmu:69305;	14.4009	14.2189	14.2291	13.9676	14.2419	14.5409	14.9239	14.4132	14.7213	14.967
Uggt1_Q6P5E4	0.117822	1.37488	0.0758841	0.603385	1.76067	-0.968394	-1.23079	-0.413237	-0.404032	-0.916181	Uggt1	UDP-glucose:glycoprotein glucosyltransferase 1	Q6P5E4	1.01786	0.00128068	0.036741	0.298677	sp|Q6P5E4|UGGG1_MOUSE UDP-glucose:glycoprotein glucosyltransferase 1 OS=Mus musculus OX=10090 GN=Uggt1 PE=1 SV=4	FUNCTION: Recognizes glycoproteins with minor folding defects. Reglucosylates single N-glycans near the misfolded part of the protein, thus providing quality control for protein folding in the endoplasmic reticulum. Reglucosylated proteins are recognized by calreticulin for recycling to the endoplasmic reticulum and refolding or degradation (By similarity). {ECO:0000250}.	SUBCELLULAR LOCATION: Endoplasmic reticulum lumen {ECO:0000250|UniProtKB:Q9NYU2, ECO:0000255|PROSITE-ProRule:PRU10138}. Endoplasmic reticulum-Golgi intermediate compartment {ECO:0000255|PROSITE-ProRule:PRU10138}.		ER-associated misfolded protein catabolic process [GO:0071712]; protein N-linked glycosylation via asparagine [GO:0018279]	UDP-glucose:glycoprotein glucosyltransferase activity [GO:0003980]; unfolded protein binding [GO:0051082]	endoplasmic reticulum [GO:0005783]; endoplasmic reticulum-Golgi intermediate compartment [GO:0005793]; endoplasmic reticulum lumen [GO:0005788]; protein-containing complex [GO:0032991]	GO:0003980; GO:0005783; GO:0005788; GO:0005793; GO:0018279; GO:0032991; GO:0051082; GO:0071712		mmu:320011;	16.8987	17.1373	16.8907	16.9909	17.2106	16.6924	16.6426	16.7978	16.7996	16.7023
Dctn3_Q9Z0Y1	-0.634108	1.25176	1.13263	1.24596	0.916688	-0.797044	-0.885354	-1.07957	-0.808381	-0.342578	Dctn3	Dynactin subunit 3	Q9Z0Y1	1.02215	0.00128859	0.036741	0.321462	sp|Q9Z0Y1|DCTN3_MOUSE Dynactin subunit 3 OS=Mus musculus OX=10090 GN=Dctn3 PE=1 SV=2	FUNCTION: Together with dynein may be involved in spindle assembly and cytokinesis. {ECO:0000250|UniProtKB:O75935}.	SUBCELLULAR LOCATION: Cytoplasm {ECO:0000250}. Cytoplasm, cytoskeleton, microtubule organizing center, centrosome {ECO:0000250}. Chromosome, centromere, kinetochore {ECO:0000250}. Cytoplasm, cytoskeleton, spindle {ECO:0000250}. Cleavage furrow {ECO:0000250}. Midbody {ECO:0000250}. Note=Localizes to punctate cytoplasmic structures and to the centrosome during interphase, and to kinetochores and to…		cytoskeleton-dependent cytokinesis [GO:0061640]; microtubule-based process [GO:0007017]		centrosome [GO:0005813]; cleavage furrow [GO:0032154]; condensed chromosome kinetochore [GO:0000777]; cytosol [GO:0005829]; dynactin complex [GO:0005869]; microtubule [GO:0005874]; microtubule associated complex [GO:0005875]; midbody [GO:0030496]; nucleolus [GO:0005730]; perinuclear region of cytoplasm [GO:0048471]; spindle [GO:0005819]	GO:0000777; GO:0005730; GO:0005813; GO:0005819; GO:0005829; GO:0005869; GO:0005874; GO:0005875; GO:0007017; GO:0030496; GO:0032154; GO:0048471; GO:0061640	R-MMU-2132295;R-MMU-2565942;R-MMU-3371497;R-MMU-380259;R-MMU-380270;R-MMU-380284;R-MMU-380320;R-MMU-5620912;R-MMU-6807878;R-MMU-6811436;R-MMU-8854518;	mmu:53598;	14.5429	14.9303	14.9058	14.9291	14.8614	14.5095	14.4913	14.4514	14.5071	14.6028
Inpp1_P49442	-0.162911	0.863463	1.74976	0.907202	0.604292	-1.21299	-1.30764	-0.740444	-0.389184	-0.311555	Inpp1	Inositol polyphosphate 1-phosphatase	P49442	1.01823	0.00129164	0.036741	0.269745	sp|P49442|INPP_MOUSE Inositol polyphosphate 1-phosphatase OS=Mus musculus OX=10090 GN=Inpp1 PE=1 SV=2				inositol phosphate dephosphorylation [GO:0046855]; phosphatidylinositol phosphorylation [GO:0046854]	inositol-1,4-bisphosphate 1-phosphatase activity [GO:0004441]; metal ion binding [GO:0046872]		GO:0004441; GO:0046854; GO:0046855; GO:0046872	R-MMU-1855183;	mmu:16329;	14.9031	15.0778	15.2286	15.0852	15.0337	14.7243	14.7082	14.8048	14.8645	14.8778
Dpysl3_Q62188	-0.0441157	0.641014	0.710278	1.5759	1.28072	-1.00936	-1.09648	-0.811456	-1.01218	-0.234325	Dpysl3	Dihydropyrimidinase-related protein 3	Q62188	1.01235	0.0013236	0.0373773	0.184643	sp|Q62188|DPYL3_MOUSE Dihydropyrimidinase-related protein 3 OS=Mus musculus OX=10090 GN=Dpysl3 PE=1 SV=1	FUNCTION: Necessary for signaling by class 3 semaphorins and subsequent remodeling of the cytoskeleton. Plays a role in axon guidance, neuronal growth cone collapse and cell migration (By similarity). {ECO:0000250}.	SUBCELLULAR LOCATION: Cytoplasm {ECO:0000250}. Cell projection, growth cone {ECO:0000250}. Note=Colocalizes with synaptic vesicle protein 2 in the central region of the growth cone. {ECO:0000250}.		actin crosslink formation [GO:0051764]; actin filament bundle assembly [GO:0051017]; cellular response to cytokine stimulus [GO:0071345]; negative regulation of cell migration [GO:0030336]; negative regulation of neuron projection development [GO:0010977]; nervous system development [GO:0007399]; positive regulation of filopodium assembly [GO:0051491]; positive regulation of neuron projection dev…	chondroitin sulfate binding [GO:0035374]; filamin binding [GO:0031005]; hydrolase activity, acting on carbon-nitrogen (but not peptide) bonds [GO:0016810]; identical protein binding [GO:0042802]; phosphoprotein binding [GO:0051219]; SH3 domain binding [GO:0017124]	cell body [GO:0044297]; cytosol [GO:0005829]; extracellular space [GO:0005615]; filamentous actin [GO:0031941]; growth cone [GO:0030426]; lamellipodium [GO:0030027]	GO:0005615; GO:0005829; GO:0007399; GO:0010976; GO:0010977; GO:0016810; GO:0017124; GO:0030027; GO:0030336; GO:0030426; GO:0031005; GO:0031941; GO:0035374; GO:0042802; GO:0044297; GO:0048678; GO:0051017; GO:0051219; GO:0051491; GO:0051764; GO:0071345	R-MMU-399956;	mmu:22240;	15.0349	15.1109	15.1186	15.2145	15.1818	14.9279	14.9183	14.9499	14.9276	15.0139
Ero1l_Q8R180	0.382461	0.291955	1.19147	1.61855	0.439877	-1.50744	-1.20863	-0.77055	0.018861	-0.456547	Ero1l	ERO1-like protein alpha	Q8R180	1.021	0.00136282	0.0374723	0.293272	sp|Q8R180|ERO1A_MOUSE ERO1-like protein alpha OS=Mus musculus OX=10090 GN=Ero1a PE=1 SV=2	FUNCTION: Oxidoreductase involved in disulfide bond formation in the endoplasmic reticulum. Efficiently reoxidizes P4HB/PDI, the enzyme catalyzing protein disulfide formation, in order to allow P4HB to sustain additional rounds of disulfide formation. Following P4HB reoxidation, passes its electrons to molecular oxygen via FAD, leading to the production of reactive oxygen species (ROS) in the cel…	SUBCELLULAR LOCATION: Endoplasmic reticulum membrane {ECO:0000250}; Peripheral membrane protein {ECO:0000250}; Lumenal side {ECO:0000250}. Note=The association with ERP44 is essential for its retention in the endoplasmic reticulum. {ECO:0000250}.		animal organ senescence [GO:0010260]; brown fat cell differentiation [GO:0050873]; cell redox homeostasis [GO:0045454]; cellular response to hypoxia [GO:0071456]; chaperone cofactor-dependent protein refolding [GO:0051085]; endoplasmic reticulum unfolded protein response [GO:0030968]; extracellular matrix organization [GO:0030198]; intrinsic apoptotic signaling pathway in response to endoplasmic …	oxidoreductase activity [GO:0016491]; oxidoreductase activity, acting on a sulfur group of donors, disulfide as acceptor [GO:0016671]; protein disulfide isomerase activity [GO:0003756]; protein disulfide oxidoreductase activity [GO:0015035]	dendrite [GO:0030425]; endoplasmic reticulum [GO:0005783]; endoplasmic reticulum membrane [GO:0005789]; integral component of endoplasmic reticulum membrane [GO:0030176]	GO:0003756; GO:0005783; GO:0005789; GO:0006457; GO:0010260; GO:0015035; GO:0016491; GO:0016671; GO:0018401; GO:0022417; GO:0030176; GO:0030198; GO:0030425; GO:0030968; GO:0034975; GO:0034976; GO:0045454; GO:0050873; GO:0051085; GO:0051209; GO:0055114; GO:0070059; GO:0071456	R-MMU-264876;R-MMU-3299685;	mmu:50527;	14.1802	14.1633	14.3314	14.4112	14.1909	13.8271	13.883	13.9648	14.1123	14.0235
Znf800_Q0VEE6	0.129249	1.314	0.321991	1.71925	0.35384	-0.77122	-1.43732	-1.10108	-0.436398	-0.0923189	Znf800	Zinc finger protein 800	Q0VEE6	1.0495	0.00136723	0.0374723	0.482564	sp|Q0VEE6|ZN800_MOUSE Zinc finger protein 800 OS=Mus musculus OX=10090 GN=Znf800 PE=1 SV=1	FUNCTION: May be involved in transcriptional regulation.	SUBCELLULAR LOCATION: Nucleus {ECO:0000305}.			DNA binding [GO:0003677]; metal ion binding [GO:0046872]	nucleus [GO:0005634]	GO:0003677; GO:0005634; GO:0046872		mmu:627049;	10.0297	10.4021	10.0903	10.5295	10.1003	9.74673	9.53737	9.64305	9.85196	9.96011
Vma21_Q78T54	0.443321	1.57589	0.471707	0.618053	0.912993	-0.634223	-1.38727	-1.55499	-0.360582	-0.0848992	Vma21	Vacuolar ATPase assembly integral membrane protein Vma21	Q78T54	1.0173	0.00137801	0.0374723	0.225567	sp|Q78T54|VMA21_MOUSE Vacuolar ATPase assembly integral membrane protein Vma21 OS=Mus musculus OX=10090 GN=Vma21 PE=1 SV=1	FUNCTION: Required for the assembly of the V0 complex of the vacuolar ATPase (V-ATPase) in the endoplasmic reticulum. {ECO:0000255|HAMAP-Rule:MF_03058}.	SUBCELLULAR LOCATION: Endoplasmic reticulum membrane {ECO:0000255|HAMAP-Rule:MF_03058}; Multi-pass membrane protein {ECO:0000255|HAMAP-Rule:MF_03058}. Endoplasmic reticulum-Golgi intermediate compartment membrane {ECO:0000255|HAMAP-Rule:MF_03058}; Multi-pass membrane protein {ECO:0000255|HAMAP-Rule:MF_03058}. Cytoplasmic vesicle, COPII-coated vesicle membrane {ECO:0000255|HAMAP-Rule:MF_03058}; Mu…		vacuolar proton-transporting V-type ATPase complex assembly [GO:0070072]		endoplasmic reticulum-Golgi intermediate compartment membrane [GO:0033116]; endoplasmic reticulum membrane [GO:0005789]; ER to Golgi transport vesicle membrane [GO:0012507]; integral component of membrane [GO:0016021]; vacuole [GO:0005773]	GO:0005773; GO:0005789; GO:0012507; GO:0016021; GO:0033116; GO:0070072		mmu:67048;	13.2156	13.3744	13.2196	13.2401	13.2814	13.0645	12.9589	12.9354	13.1029	13.1415
Mcts1_Q9DB27	-0.547776	0.818894	1.6421	1.14344	0.765157	-0.795839	-1.04058	-1.18425	-0.386067	-0.415075	Mcts1	Malignant T-cell-amplified sequence 1;Malignant T-cell-amplified sequence 2	Q9DB27	1.04509	0.00138248	0.0374723	0.575683	sp|Q9DB27|MCTS1_MOUSE Malignant T-cell-amplified sequence 1 OS=Mus musculus OX=10090 GN=Mcts1 PE=1 SV=1;sp|Q9CQ21|MCTS2_MOUSE Malignant T-cell-amplified sequence 2 OS=Mus musculus OX=10090 GN=Mcts2 PE=1 SV=1	FUNCTION: Anti-oncogene that plays a role in cell cycle regulation; decreases cell doubling time and anchorage-dependent growth; shortens the duration of G1 transit time and G1/S transition. When constitutively expressed, increases CDK4 and CDK6 kinases activity and CCND1/cyclin D1 protein level, as well as G1 cyclin/CDK complex formation. Involved in translation initiation; promotes recruitment …	SUBCELLULAR LOCATION: Cytoplasm {ECO:0000250}.		cell cycle [GO:0007049]; cellular response to DNA damage stimulus [GO:0006974]; formation of translation preinitiation complex [GO:0001731]; IRES-dependent viral translational initiation [GO:0075522]; regulation of growth [GO:0040008]; ribosome disassembly [GO:0032790]; translation reinitiation [GO:0002188]	translation initiation factor activity [GO:0003743]	cytosol [GO:0005829]; cytosolic small ribosomal subunit [GO:0022627]; plasma membrane [GO:0005886]	GO:0001731; GO:0002188; GO:0003743; GO:0005829; GO:0005886; GO:0006974; GO:0007049; GO:0022627; GO:0032790; GO:0040008; GO:0075522		mmu:68995;	12.8498	13.3645	13.6745	13.4867	13.3442	12.7564	12.6642	12.6101	12.9107	12.8998
Fam134a_Q6NS82	-0.877249	-1.42049	-0.382191	-1.22499	0.0907184	0.761426	1.68975	0.0208453	0.338246	1.00393	Fam134a	Protein FAM134A	Q6NS82	1.06018	0.00138255	0.0374723	-0.654977	sp|Q6NS82|RETR2_MOUSE Reticulophagy regulator 2 OS=Mus musculus OX=10090 GN=Retreg2 PE=1 SV=2		SUBCELLULAR LOCATION: Membrane {ECO:0000305}; Multi-pass membrane protein {ECO:0000305}.				integral component of membrane [GO:0016021]	GO:0016021		mmu:227298;	10.8344	10.6012	11.0469	10.6851	11.2499	11.5379	11.9364	11.2199	11.3562	11.642
Rps20_P60867	0.508088	1.2603	0.965862	0.760319	0.526524	-0.116893	-1.10431	-0.124821	-1.85645	-0.818618	Rps20	40S ribosomal protein S20	P60867	1.01401	0.00139229	0.0374723	0.224884	sp|P60867|RS20_MOUSE 40S ribosomal protein S20 OS=Mus musculus OX=10090 GN=Rps20 PE=1 SV=1		SUBCELLULAR LOCATION: Cytoplasm {ECO:0000250}.		translation [GO:0006412]	RNA binding [GO:0003723]; structural constituent of ribosome [GO:0003735]	cytosolic small ribosomal subunit [GO:0022627]; small ribosomal subunit [GO:0015935]; synapse [GO:0045202]	GO:0003723; GO:0003735; GO:0006412; GO:0015935; GO:0022627; GO:0045202	R-MMU-156827;R-MMU-1799339;R-MMU-6791226;R-MMU-72649;R-MMU-72689;R-MMU-72695;R-MMU-72702;R-MMU-72706;R-MMU-975956;R-MMU-975957;	mmu:67427;	16.2318	16.3369	16.2958	16.267	16.2343	16.1444	16.0063	16.1433	15.9012	16.0463
Diablo_Q9JIQ3	1.18536	-0.12942	1.5463	0.830769	0.531588	-0.920681	-0.863396	-0.00292219	-0.735032	-1.44256	Diablo	Diablo homolog, mitochondrial	Q9JIQ3	1.01882	0.00139427	0.0374723	0.255332	sp|Q9JIQ3|DBLOH_MOUSE Diablo homolog, mitochondrial OS=Mus musculus OX=10090 GN=Diablo PE=1 SV=2	FUNCTION: Promotes apoptosis by activating caspases in the cytochrome c/Apaf-1/caspase-9 pathway. Acts by opposing the inhibitory activity of inhibitor of apoptosis proteins (IAP). Inhibits the activity of BIRC6/bruce by inhibiting its binding to caspases (By similarity). {ECO:0000250, ECO:0000269|PubMed:10929712}.	SUBCELLULAR LOCATION: Mitochondrion {ECO:0000269|PubMed:10929712}. Note=Released into the cytosol when cells undergo apoptosis.		activation of cysteine-type endopeptidase activity involved in apoptotic process [GO:0006919]; activation of cysteine-type endopeptidase activity involved in apoptotic process by cytochrome c [GO:0008635]; intrinsic apoptotic signaling pathway [GO:0097193]; intrinsic apoptotic signaling pathway in response to oxidative stress [GO:0008631]; neuron apoptotic process [GO:0051402]; positive regulatio…		CD40 receptor complex [GO:0035631]; cytoplasm [GO:0005737]; cytoplasmic side of plasma membrane [GO:0009898]; mitochondrial intermembrane space [GO:0005758]; mitochondrion [GO:0005739]	GO:0005737; GO:0005739; GO:0005758; GO:0006919; GO:0008631; GO:0008635; GO:0009898; GO:0035631; GO:0043065; GO:0051402; GO:0097193	R-MMU-111457;R-MMU-111463;R-MMU-111464;R-MMU-111469;R-MMU-9627069;	mmu:66593;	13.8868	13.6751	13.9449	13.8297	13.7815	13.5477	13.5569	13.6954	13.5776	13.4636
Cfh_P06909	0.717416	1.5908	1.57418	0.257059	-0.240065	-1.11718	-0.908414	-0.764383	-0.35478	-0.754625	Cfh	Complement factor H	P06909	1.01854	0.00142949	0.0380901	0.310035	sp|P06909|CFAH_MOUSE Complement factor H OS=Mus musculus OX=10090 GN=Cfh PE=1 SV=2	FUNCTION: Glycoprotein that plays an essential role in maintaining a well-balanced immune response by modulating complement activation. Acts as a soluble inhibitor of complement, where its binding to self markers such as glycan structures prevents complement activation and amplification on cell surfaces. Accelerates the decay of the complement alternative pathway (AP) C3 convertase C3bBb, thus pr…	SUBCELLULAR LOCATION: Secreted {ECO:0000250|UniProtKB:P08603}.		activation of membrane attack complex [GO:0001905]; angiogenesis [GO:0001525]; ATP metabolic process [GO:0046034]; complement activation [GO:0006956]; complement activation, alternative pathway [GO:0006957]; determination of adult lifespan [GO:0008340]; gene expression [GO:0010467]; glomerulus development [GO:0032835]; immune response [GO:0006955]; inflammatory response [GO:0006954]; kidney devel…	complement component C3b binding [GO:0001851]; heparan sulfate proteoglycan binding [GO:0043395]; heparin binding [GO:0008201]; identical protein binding [GO:0042802]	axon [GO:0030424]; cytoplasm [GO:0005737]; external side of plasma membrane [GO:0009897]; extracellular region [GO:0005576]; extracellular space [GO:0005615]; mitochondrion [GO:0005739]; neuronal cell body [GO:0043025]; nucleus [GO:0005634]; plasma membrane [GO:0005886]	GO:0001525; GO:0001822; GO:0001851; GO:0001905; GO:0002021; GO:0003406; GO:0005576; GO:0005615; GO:0005634; GO:0005737; GO:0005739; GO:0005886; GO:0006954; GO:0006955; GO:0006956; GO:0006957; GO:0007005; GO:0007601; GO:0008201; GO:0008340; GO:0009897; GO:0010467; GO:0030424; GO:0030449; GO:0032042; GO:0032835; GO:0034097; GO:0035886; GO:0042802; GO:0043025; GO:0043395; GO:0046034; GO:0046530; GO:…	R-MMU-977606;	mmu:12628;	17.0178	17.1914	17.1881	16.9263	16.8275	16.6532	16.6947	16.7233	16.8047	16.7252
Col4a2_P08122	0.193895	0.719917	0.463408	1.28062	1.29438	-1.28653	-0.477461	0.231193	-1.05065	-1.36878	Col4a2	Collagen alpha-2(IV) chain;Canstatin	P08122	1.01477	0.00143681	0.0380901	0.25919	sp|P08122|CO4A2_MOUSE Collagen alpha-2(IV) chain OS=Mus musculus OX=10090 GN=Col4a2 PE=1 SV=4	FUNCTION: Type IV collagen is the major structural component of glomerular basement membranes (GBM), forming a 'chicken-wire' meshwork together with laminins, proteoglycans and entactin/nidogen. {ECO:0000269|PubMed:3597383}.; FUNCTION: Canstatin, a cleavage product corresponding to the collagen alpha 2(IV) NC1 domain, possesses both anti-angiogenic and anti-tumor cell activity. It inhibits prolif…	SUBCELLULAR LOCATION: Secreted, extracellular space, extracellular matrix, basement membrane {ECO:0000255|PROSITE-ProRule:PRU00736}.		aging [GO:0007568]; angiogenesis [GO:0001525]; cellular response to transforming growth factor beta stimulus [GO:0071560]; collagen-activated tyrosine kinase receptor signaling pathway [GO:0038063]; endodermal cell differentiation [GO:0035987]; extracellular matrix organization [GO:0030198]; negative regulation of angiogenesis [GO:0016525]; response to activity [GO:0014823]; transcription, DNA-te…	extracellular matrix structural constituent [GO:0005201]	basement membrane [GO:0005604]; collagen-containing extracellular matrix [GO:0062023]; collagen type IV trimer [GO:0005587]; extracellular matrix [GO:0031012]; extracellular region [GO:0005576]; extracellular space [GO:0005615]	GO:0001525; GO:0005201; GO:0005576; GO:0005587; GO:0005604; GO:0005615; GO:0006351; GO:0007568; GO:0014823; GO:0016525; GO:0030198; GO:0031012; GO:0035987; GO:0038063; GO:0062023; GO:0071560	R-MMU-1442490;R-MMU-1474244;R-MMU-1650814;R-MMU-186797;R-MMU-2022090;R-MMU-216083;R-MMU-2214320;R-MMU-2243919;R-MMU-3000157;R-MMU-3000171;R-MMU-419037;R-MMU-8948216;	mmu:12827;	17.7154	17.8016	17.7595	17.8935	17.8958	17.4726	17.6053	17.7215	17.5113	17.4592
Coro1c_Q9WUM4	0.20719	1.37538	0.121435	0.949747	1.3381	-1.46028	-1.10334	-0.0258216	-0.590974	-0.811436	Coro1c	Coronin-1C	Q9WUM4	1.01448	0.00145254	0.0381074	0.233988	sp|Q9WUM4|COR1C_MOUSE Coronin-1C OS=Mus musculus OX=10090 GN=Coro1c PE=1 SV=2	FUNCTION: Plays a role in directed cell migration by regulating the activation and subcellular location of RAC1 (PubMed:25074804, PubMed:25925950). Increases the presence of activated RAC1 at the leading edge of migrating cells (PubMed:25074804, PubMed:25925950). Required for normal organization of the cytoskeleton, including the actin cytoskeleton, microtubules and the vimentin intermediate fila…	SUBCELLULAR LOCATION: Cell membrane {ECO:0000269|PubMed:19651142, ECO:0000269|PubMed:22364218, ECO:0000269|PubMed:25074804, ECO:0000269|PubMed:25925950}; Peripheral membrane protein {ECO:0000269|PubMed:19651142, ECO:0000269|PubMed:22364218, ECO:0000269|PubMed:25074804, ECO:0000269|PubMed:25925950}; Cytoplasmic side {ECO:0000269|PubMed:19651142, ECO:0000269|PubMed:22364218, ECO:0000269|PubMed:2507…		actin cortical patch assembly [GO:0000147]; actin cytoskeleton organization [GO:0030036]; actin filament organization [GO:0007015]; activation of GTPase activity [GO:0090630]; cell migration [GO:0016477]; endosomal transport [GO:0016197]; endosome fission [GO:0140285]; endosome membrane tubulation [GO:0097750]; establishment of protein localization [GO:0045184]; membrane fission [GO:0090148]; neg…	actin filament binding [GO:0051015]; Rac GTPase binding [GO:0048365]	actin cytoskeleton [GO:0015629]; cell cortex [GO:0005938]; cytoskeleton [GO:0005856]; endosome membrane [GO:0010008]; flotillin complex [GO:0016600]; lamellipodium [GO:0030027]; lateral plasma membrane [GO:0016328]; ruffle membrane [GO:0032587]	GO:0000147; GO:0001755; GO:0001932; GO:0001933; GO:0005856; GO:0005938; GO:0006909; GO:0007015; GO:0010008; GO:0010632; GO:0010633; GO:0010762; GO:0015629; GO:0016197; GO:0016328; GO:0016477; GO:0016600; GO:0030027; GO:0030036; GO:0032587; GO:0044387; GO:0045184; GO:0048365; GO:0051015; GO:0051893; GO:0051895; GO:0090148; GO:0090630; GO:0097750; GO:0140285; GO:1900024; GO:1900025; GO:1900027; GO:…		mmu:23790;	16.3066	16.4778	16.294	16.4154	16.4723	16.0622	16.1145	16.2724	16.1896	16.1573
Atpaf2_Q91YY4	0.65177	0.0547368	0.346041	1.72259	1.12626	-0.965865	-0.507722	-0.694607	-1.58823	-0.144975	Atpaf2	ATP synthase mitochondrial F1 complex assembly factor 2	Q91YY4	1.02045	0.00145702	0.0381074	0.302535	sp|Q91YY4|ATPF2_MOUSE ATP synthase mitochondrial F1 complex assembly factor 2 OS=Mus musculus OX=10090 GN=Atpaf2 PE=1 SV=1	FUNCTION: May play a role in the assembly of the F1 component of the mitochondrial ATP synthase (ATPase). {ECO:0000250}.	SUBCELLULAR LOCATION: Mitochondrion {ECO:0000250}.		proton-transporting ATP synthase complex assembly [GO:0043461]		cytosol [GO:0005829]; mitochondrion [GO:0005739]; nuclear speck [GO:0016607]	GO:0005739; GO:0005829; GO:0016607; GO:0043461		mmu:246782;	15.0712	14.9555	15.012	15.2788	15.1632	14.7576	14.8464	14.8102	14.637	14.9168
Ddx39b_Q9Z1N5	0.460291	0.0830095	0.673987	1.39406	1.46178	-1.65522	-0.679069	-0.554849	-0.728263	-0.455722	Ddx39b	Spliceosome RNA helicase Ddx39b	Q9Z1N5	1.01293	0.00149327	0.0385478	0.199971	sp|Q9Z1N5|DX39B_MOUSE Spliceosome RNA helicase Ddx39b OS=Mus musculus OX=10090 GN=Ddx39b PE=1 SV=1	FUNCTION: Involved in nuclear export of spliced and unspliced mRNA. Assembling component of the TREX complex which is thought to couple mRNA transcription, processing and nuclear export, and specifically associates with spliced mRNA and not with unspliced pre-mRNA. TREX is recruited to spliced mRNAs by a transcription-independent mechanism, binds to mRNA upstream of the exon-junction complex (EJC…	SUBCELLULAR LOCATION: Nucleus {ECO:0000250}. Nucleus speckle {ECO:0000250}. Cytoplasm {ECO:0000250}. Note=Can translocate to the cytoplasm in the presence of MX1. {ECO:0000250}.		liver development [GO:0001889]; mRNA export from nucleus [GO:0006406]; mRNA splicing, via spliceosome [GO:0000398]; negative regulation of DNA damage checkpoint [GO:2000002]; positive regulation of cell growth involved in cardiac muscle cell development [GO:0061051]; positive regulation of DNA biosynthetic process [GO:2000573]; positive regulation of DNA-templated transcription, elongation [GO:00…	ATPase activity [GO:0016887]; ATP binding [GO:0005524]; ATP-dependent protein binding [GO:0043008]; identical protein binding [GO:0042802]; protein-containing complex binding [GO:0044877]; RNA binding [GO:0003723]; RNA-dependent ATPase activity [GO:0008186]; RNA helicase activity [GO:0003724]; U4 snRNA binding [GO:0030621]; U6 snRNA binding [GO:0017070]	cytoplasm [GO:0005737]; nuclear matrix [GO:0016363]; nuclear speck [GO:0016607]; nucleus [GO:0005634]; protein-containing complex [GO:0032991]; spliceosomal complex [GO:0005681]; transcription export complex [GO:0000346]; U4 snRNP [GO:0005687]; U6 snRNP [GO:0005688]	GO:0000245; GO:0000346; GO:0000398; GO:0001889; GO:0003723; GO:0003724; GO:0005524; GO:0005634; GO:0005681; GO:0005687; GO:0005688; GO:0005737; GO:0006406; GO:0008186; GO:0008380; GO:0010501; GO:0016363; GO:0016607; GO:0016887; GO:0017070; GO:0030621; GO:0032786; GO:0032991; GO:0042802; GO:0043008; GO:0044877; GO:0045727; GO:0046784; GO:0061051; GO:1904707; GO:2000002; GO:2000573	R-MMU-159236;R-MMU-72187;R-MMU-73856;	mmu:53817;	15.6245	15.5782	15.6507	15.7391	15.7474	15.3648	15.4846	15.4999	15.4786	15.5121
Anxa1_P10107	-0.330665	1.15995	1.06128	1.72354	0.277813	-1.10203	-0.464102	-0.957238	-0.473984	-0.894566	Anxa1	Annexin A1	P10107	1.01735	0.00151717	0.0385478	0.303248	sp|P10107|ANXA1_MOUSE Annexin A1 OS=Mus musculus OX=10090 GN=Anxa1 PE=1 SV=2	FUNCTION: Plays important roles in the innate immune response as effector of glucocorticoid-mediated responses and regulator of the inflammatory process. Has anti-inflammatory activity (PubMed:12475898). Plays a role in glucocorticoid-mediated down-regulation of the early phase of the inflammatory response (PubMed:12475898). Promotes resolution of inflammation and wound healing (PubMed:25664854).…	SUBCELLULAR LOCATION: Nucleus {ECO:0000250|UniProtKB:P07150}. Cytoplasm {ECO:0000269|PubMed:18802107, ECO:0000269|PubMed:21245195}. Cell projection, cilium {ECO:0000269|PubMed:17384087}. Basolateral cell membrane {ECO:0000250|UniProtKB:P51662}. Lateral cell membrane {ECO:0000269|PubMed:18802107}. Cell membrane {ECO:0000269|PubMed:14506282, ECO:0000269|PubMed:21245195}; Peripheral membrane protein…		actin cytoskeleton reorganization [GO:0031532]; adaptive immune response [GO:0002250]; alpha-beta T cell differentiation [GO:0046632]; arachidonic acid secretion [GO:0050482]; cell surface receptor signaling pathway [GO:0007166]; cellular response to glucocorticoid stimulus [GO:0071385]; cellular response to hydrogen peroxide [GO:0070301]; cellular response to vascular endothelial growth factor s…	calcium-dependent phospholipid binding [GO:0005544]; calcium-dependent protein binding [GO:0048306]; calcium ion binding [GO:0005509]; DNA/DNA annealing activity [GO:1990814]; double-stranded DNA helicase activity [GO:0036121]; identical protein binding [GO:0042802]; phospholipase A2 inhibitor activity [GO:0019834]; phospholipid binding [GO:0005543]; single-stranded DNA binding [GO:0003697]; sing…	actin filament [GO:0005884]; apical plasma membrane [GO:0016324]; basolateral plasma membrane [GO:0016323]; cell surface [GO:0009986]; collagen-containing extracellular matrix [GO:0062023]; cornified envelope [GO:0001533]; cytoplasm [GO:0005737]; cytoplasmic vesicle membrane [GO:0030659]; cytosol [GO:0005829]; early endosome membrane [GO:0031901]; endosome [GO:0005768]; extracellular exosome [GO:…	GO:0001533; GO:0001780; GO:0001891; GO:0002250; GO:0002548; GO:0002685; GO:0003697; GO:0003727; GO:0005509; GO:0005543; GO:0005544; GO:0005615; GO:0005634; GO:0005654; GO:0005737; GO:0005768; GO:0005829; GO:0005884; GO:0005886; GO:0006909; GO:0006954; GO:0007165; GO:0007166; GO:0007187; GO:0008360; GO:0009986; GO:0010165; GO:0014839; GO:0016323; GO:0016324; GO:0016328; GO:0018149; GO:0019834; GO:…	R-MMU-416476;R-MMU-418594;R-MMU-444473;	mmu:16952;	17.5692	17.8595	17.8403	17.9693	17.6877	17.4189	17.5432	17.4471	17.5413	17.4593
Ssr3_Q9DCF9	0.254639	0.844984	0.928154	1.60977	0.358707	-0.447634	-0.0016952	-1.03694	-1.5821	-0.927888	Ssr3	Translocon-associated protein subunit gamma	Q9DCF9	1.01561	0.00153131	0.0385478	0.225892	sp|Q9DCF9|SSRG_MOUSE Translocon-associated protein subunit gamma OS=Mus musculus OX=10090 GN=Ssr3 PE=1 SV=1	FUNCTION: TRAP proteins are part of a complex whose function is to bind calcium to the ER membrane and thereby regulate the retention of ER resident proteins. {ECO:0000250}.	SUBCELLULAR LOCATION: Endoplasmic reticulum membrane {ECO:0000250}; Multi-pass membrane protein {ECO:0000250}.		SRP-dependent cotranslational protein targeting to membrane [GO:0006614]		endoplasmic reticulum [GO:0005783]; endoplasmic reticulum membrane [GO:0005789]; integral component of membrane [GO:0016021]	GO:0005783; GO:0005789; GO:0006614; GO:0016021		mmu:67437;	14.6241	14.7076	14.7193	14.8156	14.6389	14.5249	14.5879	14.4416	14.3646	14.457
Mrpl55_Q9CZ83	0.778404	0.76	0.538138	0.203898	1.57837	-0.898755	-1.33997	0.465145	-1.02959	-1.05564	Mrpl55	39S ribosomal protein L55, mitochondrial	Q9CZ83	1.02397	0.00154159	0.0385478	0.346772	sp|Q9CZ83|RM55_MOUSE 39S ribosomal protein L55, mitochondrial OS=Mus musculus OX=10090 GN=Mrpl55 PE=1 SV=1		SUBCELLULAR LOCATION: Mitochondrion {ECO:0000250|UniProtKB:P0C2B8}.		translation [GO:0006412]	structural constituent of ribosome [GO:0003735]	mitochondrial large ribosomal subunit [GO:0005762]; mitochondrion [GO:0005739]	GO:0003735; GO:0005739; GO:0005762; GO:0006412	R-MMU-5389840;R-MMU-5419276;	mmu:67212;	14.8135	14.8094	14.7595	14.6844	14.9932	14.4367	14.3376	14.7431	14.4073	14.4014
Cdc42_P60766	1.14377	0.903385	-0.232786	1.69861	0.584623	-0.923759	-0.869201	-0.697148	-1.1259	-0.481597	Cdc42	Cell division control protein 42 homolog	P60766	1.01211	0.00154802	0.0385478	0.190733	sp|P60766|CDC42_MOUSE Cell division control protein 42 homolog OS=Mus musculus OX=10090 GN=Cdc42 PE=1 SV=2	FUNCTION: Plasma membrane-associated small GTPase which cycles between an active GTP-bound and an inactive GDP-bound state (PubMed:24352656). In its active state binds to a variety of effector proteins to regulate cellular responses. Involved in epithelial cell polarization processes. Regulates the bipolar attachment of spindle microtubules to kinetochores before chromosome congression in metapha…	SUBCELLULAR LOCATION: Cell membrane {ECO:0000269|PubMed:22461490}; Lipid-anchor {ECO:0000305}; Cytoplasmic side {ECO:0000305}. Midbody {ECO:0000250|UniProtKB:P60953}. Cytoplasm, cytoskeleton, microtubule organizing center, centrosome {ECO:0000250|UniProtKB:P60953}. Cytoplasm, cytoskeleton, spindle {ECO:0000250|UniProtKB:P60953}. Cytoplasm {ECO:0000269|PubMed:22461490}. Cell projection, lamellipod…		actin filament branching [GO:0090135]; actin filament organization [GO:0007015]; adherens junction organization [GO:0034332]; cardiac conduction system development [GO:0003161]; Cdc42 protein signal transduction [GO:0032488]; cell-cell adhesion [GO:0098609]; cell junction assembly [GO:0034329]; cell migration [GO:0016477]; cell projection assembly [GO:0030031]; cellular protein localization [GO:0…	apolipoprotein A-I receptor binding [GO:0034191]; GBD domain binding [GO:0032427]; GTPase activity [GO:0003924]; GTP binding [GO:0005525]; GTP-dependent protein binding [GO:0030742]; identical protein binding [GO:0042802]; mitogen-activated protein kinase kinase kinase binding [GO:0031435]; protein kinase binding [GO:0019901]; thioesterase binding [GO:0031996]; ubiquitin protein ligase activity […	apical part of cell [GO:0045177]; cell-cell junction [GO:0005911]; cell periphery [GO:0071944]; cell projection [GO:0042995]; centrosome [GO:0005813]; cytoplasm [GO:0005737]; cytoplasmic ribonucleoprotein granule [GO:0036464]; cytosol [GO:0005829]; dendritic spine [GO:0043197]; filopodium [GO:0030175]; Golgi membrane [GO:0000139]; Golgi transport complex [GO:0017119]; lamellipodium membrane [GO:0…	GO:0000139; GO:0000322; GO:0002040; GO:0003161; GO:0003924; GO:0005525; GO:0005737; GO:0005813; GO:0005829; GO:0005886; GO:0005911; GO:0006897; GO:0006911; GO:0007015; GO:0007030; GO:0007088; GO:0007097; GO:0007163; GO:0007229; GO:0007266; GO:0010592; GO:0016020; GO:0016197; GO:0016477; GO:0017119; GO:0019901; GO:0030031; GO:0030141; GO:0030175; GO:0030307; GO:0030496; GO:0030742; GO:0031256; GO:…	R-MMU-114604;R-MMU-182971;R-MMU-194840;R-MMU-2029482;R-MMU-389359;R-MMU-3928662;R-MMU-418885;R-MMU-4420097;R-MMU-525793;R-MMU-5625970;R-MMU-5626467;R-MMU-5627123;R-MMU-5663213;R-MMU-5663220;R-MMU-5687128;R-MMU-8964616;R-MMU-983231;	mmu:12540;	15.9726	15.9446	15.8124	16.0372	15.9075	15.732	15.7383	15.7584	15.7085	15.7835
Agpat9_Q8C0N2	0.103134	0.4927	0.562563	1.5132	1.50656	-0.849278	-1.26778	-0.875427	-0.402052	-0.783619	Agpat9	Glycerol-3-phosphate acyltransferase 3	Q8C0N2	1.01228	0.00154936	0.0385478	0.173502	sp|Q8C0N2|GPAT3_MOUSE Glycerol-3-phosphate acyltransferase 3 OS=Mus musculus OX=10090 GN=Gpat3 PE=1 SV=1	FUNCTION: Converts glycerol-3-phosphate to 1-acyl-sn-glycerol-3-phosphate (lysophosphatidic acid or LPA) by incorporating an acyl moiety at the sn-1 position of the glycerol backbone (PubMed:17170135). Also converts LPA into 1,2-diacyl-sn-glycerol-3-phosphate (phosphatidic acid or PA) by incorporating an acyl moiety at the sn-2 position of the glycerol backbone (By similarity). {ECO:0000250|UniPr…	SUBCELLULAR LOCATION: Endoplasmic reticulum membrane {ECO:0000269|PubMed:17170135}; Multi-pass membrane protein {ECO:0000255}.		CDP-diacylglycerol biosynthetic process [GO:0016024]; glycerol-3-phosphate metabolic process [GO:0006072]; phospholipid biosynthetic process [GO:0008654]; regulation of TOR signaling [GO:0032006]; triglyceride biosynthetic process [GO:0019432]	1-acylglycerol-3-phosphate O-acyltransferase activity [GO:0003841]; glycerol-3-phosphate O-acyltransferase activity [GO:0004366]; sn-1-glycerol-3-phosphate C16:0-DCA-CoA acyl transferase activity [GO:0102420]	endoplasmic reticulum [GO:0005783]; endoplasmic reticulum membrane [GO:0005789]; integral component of membrane [GO:0016021]	GO:0003841; GO:0004366; GO:0005783; GO:0005789; GO:0006072; GO:0008654; GO:0016021; GO:0016024; GO:0019432; GO:0032006; GO:0102420	R-MMU-1483166;	mmu:231510;	14.2271	14.2676	14.2748	14.3735	14.3728	14.1283	14.0848	14.1255	14.1747	14.1351
Ptpn12_P35831	-0.900343	-0.046013	-0.555959	-1.56183	-0.766357	0.346927	1.66608	-0.102045	0.733196	1.18634	Ptpn12	Tyrosine-protein phosphatase non-receptor type 12	P35831	1.03195	0.00155422	0.0385478	-0.409377	sp|P35831|PTN12_MOUSE Tyrosine-protein phosphatase non-receptor type 12 OS=Mus musculus OX=10090 GN=Ptpn12 PE=1 SV=3	FUNCTION: Dephosphorylates a range of proteins, and thereby regulates cellular signaling cascades (PubMed:17070019). Dephosphorylates cellular tyrosine kinases, such as ERBB2 and PTK2B/PYK2, and thereby regulates signaling via ERBB2 and PTK2B/PYK2. Selectively dephosphorylates ERBB2 phosphorylated at 'Tyr-1112', 'Tyr-1196', and/or 'Tyr-1248' (By similarity). {ECO:0000250|UniProtKB:Q05209, ECO:000…	SUBCELLULAR LOCATION: Cytoplasm {ECO:0000269|PubMed:12674328, ECO:0000269|PubMed:7772023}. Cell junction, focal adhesion {ECO:0000250|UniProtKB:Q05209}. Cell projection, podosome {ECO:0000269|PubMed:12674328}. Note=Partial translocation to focal adhesion sites might be mediated by interaction with SORBS2. {ECO:0000250|UniProtKB:Q05209}.		cellular response to epidermal growth factor stimulus [GO:0071364]; peptidyl-tyrosine dephosphorylation [GO:0035335]; protein dephosphorylation [GO:0006470]; regulation of epidermal growth factor receptor signaling pathway [GO:0042058]; tissue regeneration [GO:0042246]	non-membrane spanning protein tyrosine phosphatase activity [GO:0004726]; phosphoprotein phosphatase activity [GO:0004721]; protein tyrosine phosphatase activity [GO:0004725]; SH3 domain binding [GO:0017124]	cell projection [GO:0042995]; cytoplasm [GO:0005737]; cytosol [GO:0005829]; focal adhesion [GO:0005925]; nucleus [GO:0005634]; podosome [GO:0002102]	GO:0002102; GO:0004721; GO:0004725; GO:0004726; GO:0005634; GO:0005737; GO:0005829; GO:0005925; GO:0006470; GO:0017124; GO:0035335; GO:0042058; GO:0042246; GO:0042995; GO:0071364	R-MMU-1250196;R-MMU-182971;R-MMU-186797;R-MMU-8863795;	mmu:19248;	12.7781	13.0064	12.8702	12.6014	12.8139	13.1114	13.4638	12.9914	13.2146	13.3357
Clic1_Q9Z1Q5	0.220565	0.363191	1.36359	1.20984	0.781301	-1.35155	-1.2865	-1.0848	0.211641	-0.427278	Clic1	Chloride intracellular channel protein 1	Q9Z1Q5	1.0175	0.00155483	0.0385478	0.256191	sp|Q9Z1Q5|CLIC1_MOUSE Chloride intracellular channel protein 1 OS=Mus musculus OX=10090 GN=Clic1 PE=1 SV=3	FUNCTION: Can insert into membranes and form chloride ion channels. Channel activity depends on the pH. Membrane insertion seems to be redox-regulated and may occur only under oxydizing conditions (By similarity). {ECO:0000250}.	SUBCELLULAR LOCATION: Nucleus {ECO:0000250}. Nucleus membrane {ECO:0000250}; Single-pass membrane protein {ECO:0000250}. Cytoplasm {ECO:0000250}. Cell membrane {ECO:0000250}; Single-pass membrane protein {ECO:0000250}. Note=Mostly in the nucleus including in the nuclear membrane. Small amount in the cytoplasm and the plasma membrane. Exists both as soluble cytoplasmic protein and as membrane prot…		chloride transport [GO:0006821]; glutathione metabolic process [GO:0006749]; positive regulation of osteoblast differentiation [GO:0045669]; regulation of cell cycle [GO:0051726]; regulation of ion transmembrane transport [GO:0034765]; regulation of mitochondrial membrane potential [GO:0051881]	chloride channel activity [GO:0005254]; voltage-gated ion channel activity [GO:0005244]	chloride channel complex [GO:0034707]; cytoplasm [GO:0005737]; extracellular exosome [GO:0070062]; mitochondrion [GO:0005739]; nuclear envelope [GO:0005635]; nuclear membrane [GO:0031965]; nucleus [GO:0005634]; perinuclear region of cytoplasm [GO:0048471]; plasma membrane [GO:0005886]	GO:0005244; GO:0005254; GO:0005634; GO:0005635; GO:0005737; GO:0005739; GO:0005886; GO:0006749; GO:0006821; GO:0031965; GO:0034707; GO:0034765; GO:0045669; GO:0048471; GO:0051726; GO:0051881; GO:0070062		mmu:114584;	14.7993	14.8225	14.9852	14.9602	14.8905	14.5436	14.5542	14.587	14.7979	14.6939
Ambp_Q07456	0.433392	0.840517	1.47404	0.831521	0.227128	-1.5639	-1.55535	-0.155216	0.0161933	-0.548322	Ambp	Protein AMBP;Alpha-1-microglobulin;Inter-alpha-trypsin inhibitor light chain;Trypstatin	Q07456	1.0443	0.00156288	0.0385478	0.505401	sp|Q07456|AMBP_MOUSE Protein AMBP OS=Mus musculus OX=10090 GN=Ambp PE=1 SV=2	FUNCTION: Inter-alpha-trypsin inhibitor inhibits trypsin, plasmin, and lysosomal granulocytic elastase. Inhibits calcium oxalate crystallization (By similarity). {ECO:0000250}.; FUNCTION: Trypstatin is a trypsin inhibitor. {ECO:0000250}.	SUBCELLULAR LOCATION: Secreted.		protein catabolic process [GO:0030163]; protein-chromophore linkage [GO:0018298]; protein maturation [GO:0051604]	heme binding [GO:0020037]; IgA binding [GO:0019862]; protein homodimerization activity [GO:0042803]; serine-type endopeptidase inhibitor activity [GO:0004867]	cell surface [GO:0009986]; collagen-containing extracellular matrix [GO:0062023]; extracellular space [GO:0005615]; intracellular membrane-bounded organelle [GO:0043231]; plasma membrane [GO:0005886]	GO:0004867; GO:0005615; GO:0005886; GO:0009986; GO:0018298; GO:0019862; GO:0020037; GO:0030163; GO:0042803; GO:0043231; GO:0051604; GO:0062023	R-MMU-2168880;	mmu:11699;	11.8049	11.94	12.1503	11.937	11.7364	11.1419	11.1447	11.6095	11.6664	11.479
Sh3bgrl3_Q91VW3	-0.00862179	1.37949	1.31039	1.28488	0.0663043	-0.441769	-0.905144	-1.16488	-0.446521	-1.07412	Sh3bgrl3	SH3 domain-binding glutamic acid-rich-like protein 3	Q91VW3	1.01511	0.00159797	0.0391652	0.207536	sp|Q91VW3|SH3L3_MOUSE SH3 domain-binding glutamic acid-rich-like protein 3 OS=Mus musculus OX=10090 GN=Sh3bgrl3 PE=1 SV=1	FUNCTION: Could act as a modulator of glutaredoxin biological activity. {ECO:0000250}.	SUBCELLULAR LOCATION: Cytoplasm {ECO:0000250}. Nucleus {ECO:0000250}.			protein disulfide oxidoreductase activity [GO:0015035]	cytoplasm [GO:0005737]; nuclear body [GO:0016604]	GO:0005737; GO:0015035; GO:0016604		mmu:73723;	13.8346	14.0132	14.0043	14.001	13.8442	13.7788	13.7192	13.6858	13.7782	13.6975
Xab2_Q9DCD2	-0.361397	0.800479	0.872078	1.71006	0.890488	-0.24748	-1.20082	-0.522874	-1.184	-0.756537	Xab2	Pre-mRNA-splicing factor SYF1	Q9DCD2	1.02327	0.00162831	0.0396595	0.268278	sp|Q9DCD2|SYF1_MOUSE Pre-mRNA-splicing factor SYF1 OS=Mus musculus OX=10090 GN=Xab2 PE=1 SV=1	FUNCTION: Involved in pre-mRNA splicing as component of the spliceosome. Involved in transcription-coupled repair (TCR), transcription and pre-mRNA splicing. {ECO:0000250|UniProtKB:Q9HCS7}.	SUBCELLULAR LOCATION: Nucleus {ECO:0000250|UniProtKB:Q99PK0}. Note=Detected in the splicing complex carrying pre-mRNA. {ECO:0000250|UniProtKB:Q99PK0}.		blastocyst development [GO:0001824]; cerebral cortex development [GO:0021987]; generation of catalytic spliceosome for first transesterification step [GO:0000349]; mRNA splicing, via spliceosome [GO:0000398]; transcription, DNA-templated [GO:0006351]; transcription-coupled nucleotide-excision repair [GO:0006283]		catalytic step 2 spliceosome [GO:0071013]; intracellular membrane-bounded organelle [GO:0043231]; nucleoplasm [GO:0005654]; nucleus [GO:0005634]; post-mRNA release spliceosomal complex [GO:0071014]; Prp19 complex [GO:0000974]; U2-type catalytic step 2 spliceosome [GO:0071007]	GO:0000349; GO:0000398; GO:0000974; GO:0001824; GO:0005634; GO:0005654; GO:0006283; GO:0006351; GO:0021987; GO:0043231; GO:0071007; GO:0071013; GO:0071014	R-MMU-6781823;R-MMU-6782135;R-MMU-6782210;R-MMU-72163;	mmu:67439;	11.6014	11.8006	11.8129	11.9565	11.816	11.6209	11.4574	11.5737	11.4603	11.5336
Ilf3_Q9Z1X4	-0.482936	1.15017	0.572661	1.02092	1.54587	-1.22653	-1.01973	-0.983131	-0.345852	-0.231441	Ilf3	Interleukin enhancer-binding factor 3	Q9Z1X4	1.02815	0.00164687	0.0398624	0.450492	sp|Q9Z1X4|ILF3_MOUSE Interleukin enhancer-binding factor 3 OS=Mus musculus OX=10090 GN=Ilf3 PE=1 SV=2	FUNCTION: RNA-binding protein that plays an essential role in the biogenesis of circular RNAs (circRNAs) which are produced by back-splicing circularization of pre-mRNAs. Within the nucleus, promotes circRNAs processing by stabilizing the regulatory elements residing in the flanking introns of the circularized exons. Plays thereby a role in the back-splicing of a subset of circRNAs. As a conseque…	SUBCELLULAR LOCATION: Nucleus, nucleolus {ECO:0000250|UniProtKB:Q12906}. Cytoplasm {ECO:0000269|PubMed:21123651}. Nucleus {ECO:0000269|PubMed:21123651}. Note=Localizes in the cytoplasm in response to viral infection. The unphosphorylated form is retained in the nucleus by ILF2. Phosphorylation at Thr-188 and Thr-315 causes the dissociation of ILF2 from the ILF2-ILF3 complex resulting in a cytopla…		defense response to virus [GO:0051607]; negative regulation of transcription, DNA-templated [GO:0045892]; negative regulation of translation [GO:0017148]; negative regulation of viral genome replication [GO:0045071]; positive regulation of transcription, DNA-templated [GO:0045893]; protein methylation [GO:0006479]; protein phosphorylation [GO:0006468]	DNA binding [GO:0003677]; double-stranded RNA binding [GO:0003725]; enzyme binding [GO:0019899]; mRNA 3'-UTR AU-rich region binding [GO:0035925]; single-stranded RNA binding [GO:0003727]	cytoplasm [GO:0005737]; mitochondrion [GO:0005739]; nucleolus [GO:0005730]; nucleoplasm [GO:0005654]; nucleus [GO:0005634]; ribonucleoprotein complex [GO:1990904]	GO:0003677; GO:0003725; GO:0003727; GO:0005634; GO:0005654; GO:0005730; GO:0005737; GO:0005739; GO:0006468; GO:0006479; GO:0017148; GO:0019899; GO:0035925; GO:0045071; GO:0045892; GO:0045893; GO:0051607; GO:1990904		mmu:16201;	16.0879	16.571	16.4002	16.5328	16.6881	15.8679	15.9291	15.9399	16.1284	16.1623
Trmt1_Q3TX08	0.0447932	0.312413	1.13196	0.812133	1.57503	-0.436725	-1.33784	-0.168219	-1.5148	-0.418741	Trmt1	tRNA (guanine(26)-N(2))-dimethyltransferase	Q3TX08	1.0234	0.00171141	0.0411689	0.290472	sp|Q3TX08|TRM1_MOUSE tRNA (guanine(26)-N(2))-dimethyltransferase OS=Mus musculus OX=10090 GN=Trmt1 PE=1 SV=2	FUNCTION: Dimethylates a single guanine residue at position 26 of most tRNAs using S-adenosyl-L-methionine as donor of the methyl groups. {ECO:0000250}.			tRNA N2-guanine methylation [GO:0002940]	metal ion binding [GO:0046872]; tRNA (guanine-N2-)-methyltransferase activity [GO:0004809]; tRNA binding [GO:0000049]	nucleus [GO:0005634]	GO:0000049; GO:0002940; GO:0004809; GO:0005634; GO:0046872		mmu:212528;	12.5693	12.6195	12.773	12.7131	12.856	12.4791	12.3103	12.5294	12.2772	12.4825
Cebpb_P28033	0.094176	1.28753	0.382635	1.23549	0.799203	-1.42849	-0.384666	-1.66332	-0.24674	-0.0758184	Cebpb	CCAAT/enhancer-binding protein beta	P28033	1.03614	0.00174457	0.0412362	0.432004	sp|P28033|CEBPB_MOUSE CCAAT/enhancer-binding protein beta OS=Mus musculus OX=10090 GN=Cebpb PE=1 SV=1	FUNCTION: Important transcription factor regulating the expression of genes involved in immune and inflammatory responses (PubMed:16585579, PubMed:17911624, PubMed:18486321, PubMed:20111005). Plays also a significant role in adipogenesis, as well as in the gluconeogenic pathway, liver regeneration, and hematopoiesis (PubMed:9727068, PubMed:10635333, PubMed:17301242, PubMed:17601773, PubMed:194780…	SUBCELLULAR LOCATION: Nucleus {ECO:0000269|PubMed:16585579, ECO:0000269|PubMed:19015024}. Cytoplasm {ECO:0000250|UniProtKB:P17676}. Note=In T-cells when sumoylated drawn to pericentric heterochromatin thereby allowing proliferation (PubMed:16585579). Translocates to the nucleus when phosphorylated at Ser-288 (By similarity). {ECO:0000250|UniProtKB:P17676, ECO:0000269|PubMed:16585579}.		brown fat cell differentiation [GO:0050873]; cellular response to amino acid stimulus [GO:0071230]; cellular response to interleukin-1 [GO:0071347]; cellular response to lipopolysaccharide [GO:0071222]; cellular response to organic cyclic compound [GO:0071407]; defense response to bacterium [GO:0042742]; embryonic placenta development [GO:0001892]; fat cell differentiation [GO:0045444]; granuloma…	chromatin binding [GO:0003682]; DNA binding [GO:0003677]; DNA-binding transcription activator activity, RNA polymerase II-specific [GO:0001228]; DNA-binding transcription factor activity, RNA polymerase II-specific [GO:0000981]; DNA-binding transcription repressor activity, RNA polymerase II-specific [GO:0001227]; glucocorticoid receptor binding [GO:0035259]; histone acetyltransferase binding [GO…	CHOP-C/EBP complex [GO:0036488]; condensed chromosome, centromeric region [GO:0000779]; cytoplasm [GO:0005737]; nuclear chromatin [GO:0000790]; nuclear matrix [GO:0016363]; nucleoplasm [GO:0005654]; nucleus [GO:0005634]; RNA polymerase II transcription regulator complex [GO:0090575]	GO:0000122; GO:0000779; GO:0000790; GO:0000976; GO:0000977; GO:0000978; GO:0000979; GO:0000981; GO:0001227; GO:0001228; GO:0001541; GO:0001892; GO:0002432; GO:0003677; GO:0003682; GO:0005634; GO:0005654; GO:0005737; GO:0006355; GO:0006357; GO:0007613; GO:0008134; GO:0010628; GO:0016363; GO:0019900; GO:0030182; GO:0032496; GO:0032675; GO:0032753; GO:0033598; GO:0034976; GO:0035035; GO:0035259; GO:…	R-MMU-2559582;	mmu:12608;	12.1965	12.5358	12.2785	12.521	12.3969	11.7636	12.0604	11.6969	12.0996	12.1482
Nars_Q8BP47	0.380069	0.832605	0.599526	1.10587	1.0299	-1.96652	-0.845282	-0.867432	-0.407299	0.138565	Nars	Asparagine--tRNA ligase, cytoplasmic	Q8BP47	1.01508	0.00175122	0.0412362	0.233631	sp|Q8BP47|SYNC_MOUSE Asparagine--tRNA ligase, cytoplasmic OS=Mus musculus OX=10090 GN=Nars PE=1 SV=2	FUNCTION: Catalyzes the attachment of asparagine to tRNA(Asn) in a two-step reaction: asparagine is first activated by ATP to form Asn-AMP and then transferred to the acceptor end of tRNA(Asn). In addition to its essential role in protein synthesis, acts as a signaling molecule that induces immune response in a CCR3-dependent manner. {ECO:0000250|UniProtKB:O43776}.	SUBCELLULAR LOCATION: Cytoplasm {ECO:0000250|UniProtKB:O43776}.		asparaginyl-tRNA aminoacylation [GO:0006421]; cell migration [GO:0016477]	asparagine-tRNA ligase activity [GO:0004816]; ATP binding [GO:0005524]; CCR3 chemokine receptor binding [GO:0031728]; nucleic acid binding [GO:0003676]; protein dimerization activity [GO:0046983]	cytosol [GO:0005829]; mitochondrion [GO:0005739]	GO:0003676; GO:0004816; GO:0005524; GO:0005739; GO:0005829; GO:0006421; GO:0016477; GO:0031728; GO:0046983		mmu:70223;	15.6703	15.7373	15.7028	15.7777	15.7665	15.3232	15.489	15.4858	15.5538	15.6346
Ap1s1_P61967	0.539446	0.489853	1.28793	0.283043	1.3113	-1.87515	-0.476965	-0.145759	-1.0579	-0.355806	Ap1s1	AP-1 complex subunit sigma-1A	P61967	1.01844	0.00175825	0.0412362	0.254938	sp|P61967|AP1S1_MOUSE AP-1 complex subunit sigma-1A OS=Mus musculus OX=10090 GN=Ap1s1 PE=1 SV=1	FUNCTION: Subunit of clathrin-associated adaptor protein complex 1 that plays a role in protein sorting in the late-Golgi/trans-Golgi network (TGN) and/or endosomes. The AP complexes mediate both the recruitment of clathrin to membranes and the recognition of sorting signals within the cytosolic tails of transmembrane cargo molecules.	SUBCELLULAR LOCATION: Golgi apparatus. Cytoplasmic vesicle membrane; Peripheral membrane protein; Cytoplasmic side. Membrane, clathrin-coated pit. Note=Component of the coat surrounding the cytoplasmic face of coated vesicles located at the Golgi complex.		intracellular protein transport [GO:0006886]; retrograde transport, endosome to Golgi [GO:0042147]; vesicle-mediated transport [GO:0016192]		AP-1 adaptor complex [GO:0030121]; clathrin-coated pit [GO:0005905]; cytosol [GO:0005829]; Golgi apparatus [GO:0005794]; intracellular membrane-bounded organelle [GO:0043231]; terminal bouton [GO:0043195]; trans-Golgi network [GO:0005802]	GO:0005794; GO:0005802; GO:0005829; GO:0005905; GO:0006886; GO:0016192; GO:0030121; GO:0042147; GO:0043195; GO:0043231	R-MMU-2132295;R-MMU-432720;R-MMU-432722;	mmu:11769;	14.0401	14.0321	14.1621	13.9984	14.1659	13.6467	13.8745	13.9285	13.7799	13.8943
Rpl29_P47915	0.202101	1.17083	0.673528	0.93634	0.931151	-0.780401	-1.36094	-0.472473	-1.61477	0.314642	Rpl29	60S ribosomal protein L29	P47915	1.0157	0.00176824	0.0412362	0.252393	sp|P47915|RL29_MOUSE 60S ribosomal protein L29 OS=Mus musculus OX=10090 GN=Rpl29 PE=1 SV=2	FUNCTION: Component of the large ribosomal subunit. {ECO:0000250|UniProtKB:P47914}.			cell population proliferation [GO:0008283]; cell-substrate adhesion [GO:0031589]; cytoplasmic translation [GO:0002181]; multicellular organism growth [GO:0035264]; translation [GO:0006412]	heparin binding [GO:0008201]; structural constituent of ribosome [GO:0003735]	cytosolic large ribosomal subunit [GO:0022625]; cytosolic ribosome [GO:0022626]; extrinsic component of membrane [GO:0019898]; polysomal ribosome [GO:0042788]; ribosome [GO:0005840]; synapse [GO:0045202]	GO:0002181; GO:0003735; GO:0005840; GO:0006412; GO:0008201; GO:0008283; GO:0019898; GO:0022625; GO:0022626; GO:0031589; GO:0035264; GO:0042788; GO:0045202	R-MMU-156827;R-MMU-1799339;R-MMU-6791226;R-MMU-72689;R-MMU-72706;R-MMU-975956;R-MMU-975957;	mmu:19944;	16.2302	16.3863	16.3062	16.3485	16.3477	16.0718	15.9782	16.1214	15.9373	16.2483
Tinagl1_Q99JR5	1.34468	-0.00227232	0.925158	1.08099	0.761857	-1.23125	-1.34021	-0.210737	-0.24678	-1.08144	Tinagl1	Tubulointerstitial nephritis antigen-like	Q99JR5	1.01178	0.00177831	0.0412362	0.179271	sp|Q99JR5|TINAL_MOUSE Tubulointerstitial nephritis antigen-like OS=Mus musculus OX=10090 GN=Tinagl1 PE=1 SV=1	FUNCTION: May be implicated in the adrenocortical zonation and in mechanisms for repressing the CYP11B1 gene expression in adrenocortical cells. This is a non catalytic peptidase C1 family protein. {ECO:0000269|PubMed:12600995}.	SUBCELLULAR LOCATION: Secreted.			cysteine-type peptidase activity [GO:0008234]; laminin binding [GO:0043236]	collagen-containing extracellular matrix [GO:0062023]; cytoplasm [GO:0005737]; extracellular space [GO:0005615]; lysosome [GO:0005764]	GO:0005615; GO:0005737; GO:0005764; GO:0008234; GO:0043236; GO:0062023		mmu:94242;	15.4518	15.3049	15.406	15.423	15.3882	15.1709	15.159	15.2822	15.2782	15.1872
Mtg1_Q8R2R6	-0.583926	0.767561	1.81129	1.1168	0.684486	-0.460796	-0.881908	-1.0185	-0.62729	-0.80772	Mtg1	Mitochondrial ribosome-associated GTPase 1	Q8R2R6	1.02807	0.00178855	0.0412362	0.422763	sp|Q8R2R6|MTG1_MOUSE Mitochondrial ribosome-associated GTPase 1 OS=Mus musculus OX=10090 GN=Mtg1 PE=1 SV=2	FUNCTION: Plays a role in the regulation of the mitochondrial ribosome assembly and of translational activity (By similarity). Displays mitochondrial GTPase activity (By similarity). {ECO:0000250|UniProtKB:Q9BT17}.	SUBCELLULAR LOCATION: Mitochondrion inner membrane {ECO:0000250|UniProtKB:Q9BT17}; Peripheral membrane protein {ECO:0000250|UniProtKB:Q9BT17}; Matrix side {ECO:0000250|UniProtKB:Q9BT17}.		regulation of mitochondrial translation [GO:0070129]; regulation of respiratory system process [GO:0044065]	GTPase activity [GO:0003924]; GTP binding [GO:0005525]	mitochondrial inner membrane [GO:0005743]; mitochondrial matrix [GO:0005759]; mitochondrial ribosome [GO:0005761]; mitochondrion [GO:0005739]	GO:0003924; GO:0005525; GO:0005739; GO:0005743; GO:0005759; GO:0005761; GO:0044065; GO:0070129		mmu:212508;	15.1085	15.4848	15.7754	15.5821	15.4617	15.1428	15.0256	14.9876	15.0965	15.0462
Hnrnpab_Q99020	0.730662	0.309388	1.68953	0.792452	0.346484	-1.36699	-0.998916	-1.29034	-0.433144	0.220875	Hnrnpab	Heterogeneous nuclear ribonucleoprotein A/B	Q99020	1.01581	0.00179079	0.0412362	0.287762	sp|Q99020|ROAA_MOUSE Heterogeneous nuclear ribonucleoprotein A/B OS=Mus musculus OX=10090 GN=Hnrnpab PE=1 SV=1	FUNCTION: Transcriptional repressor. Binds to CArG box motifs, single-stranded and double-stranded DNA, and RNA. It may be that repression by CBF-A is a result of competitive binding of CBF, a putative positive factor, and CBF-A to the same or overlapping motifs around the CArG boxes.	SUBCELLULAR LOCATION: Nucleus {ECO:0000305}. Cytoplasm {ECO:0000250}. Note=Localized in cytoplasmic mRNP granules containing untranslated mRNAs. {ECO:0000250}.		epithelial to mesenchymal transition [GO:0001837]; negative regulation of transcription by RNA polymerase II [GO:0000122]; positive regulation of transcription, DNA-templated [GO:0045893]	RNA binding [GO:0003723]; sequence-specific double-stranded DNA binding [GO:1990837]	cytoplasm [GO:0005737]; nucleoplasm [GO:0005654]; nucleus [GO:0005634]; presynaptic cytosol [GO:0099523]; ribonucleoprotein complex [GO:1990904]; RNA polymerase II transcription regulator complex [GO:0090575]	GO:0000122; GO:0001837; GO:0003723; GO:0005634; GO:0005654; GO:0005737; GO:0045893; GO:0090575; GO:0099523; GO:1990837; GO:1990904		mmu:15384;	18.4799	18.4016	18.6582	18.4914	18.4085	18.0898	18.1583	18.1041	18.2635	18.3851
Gnb2l1_P68040	0.652434	1.34813	-0.339993	1.20979	1.0447	-1.4994	-1.09197	-0.431608	-0.621413	-0.270678	Gnb2l1	Guanine nucleotide-binding protein subunit beta-2-like 1;Guanine nucleotide-binding protein subunit beta-2-like 1, N-terminally processed	P68040	1.01378	0.00181504	0.0412362	0.247577	sp|P68040|RACK1_MOUSE Receptor of activated protein C kinase 1 OS=Mus musculus OX=10090 GN=Rack1 PE=1 SV=3	FUNCTION: Scaffolding protein involved in the recruitment, assembly and/or regulation of a variety of signaling molecules. Interacts with a wide variety of proteins and plays a role in many cellular processes. Component of the 40S ribosomal subunit involved in translational repression. Involved in the initiation of the ribosome quality control (RQC), a pathway that takes place when a ribosome has…	SUBCELLULAR LOCATION: Cell membrane {ECO:0000250|UniProtKB:P63244}; Peripheral membrane protein {ECO:0000250|UniProtKB:P63244}. Cytoplasm {ECO:0000269|PubMed:20093473}. Cytoplasm, perinuclear region {ECO:0000250|UniProtKB:P63244}. Nucleus {ECO:0000269|PubMed:20093473}. Perikaryon {ECO:0000269|PubMed:16414032}. Cell projection, dendrite {ECO:0000269|PubMed:16414032}. Note=Recruited to the plasma m…		activation of cysteine-type endopeptidase activity involved in apoptotic process [GO:0006919]; cell cycle [GO:0007049]; cellular response to glucose stimulus [GO:0071333]; cellular response to growth factor stimulus [GO:0071363]; gastrulation [GO:0007369]; intracellular signal transduction [GO:0035556]; negative regulation of cell growth [GO:0030308]; negative regulation of gene expression [GO:00…	BH3 domain binding [GO:0051434]; cyclin binding [GO:0030332]; cysteine-type endopeptidase activator activity involved in apoptotic process [GO:0008656]; enzyme binding [GO:0019899]; ion channel inhibitor activity [GO:0008200]; protein homodimerization activity [GO:0042803]; protein kinase C binding [GO:0005080]; protein phosphatase binding [GO:0019903]; protein tyrosine kinase inhibitor activity …	cell body [GO:0044297]; cytoplasm [GO:0005737]; cytosol [GO:0005829]; cytosolic small ribosomal subunit [GO:0022627]; dendrite [GO:0030425]; intracellular membrane-bounded organelle [GO:0043231]; IRE1-RACK1-PP2A complex [GO:1990630]; midbody [GO:0030496]; mitochondrion [GO:0005739]; neuronal cell body [GO:0043025]; neuron projection [GO:0043005]; nucleoplasm [GO:0005654]; nucleus [GO:0005634]; pe…	GO:0001891; GO:0001934; GO:0005080; GO:0005634; GO:0005654; GO:0005737; GO:0005739; GO:0005829; GO:0006412; GO:0006919; GO:0007049; GO:0007369; GO:0008104; GO:0008200; GO:0008656; GO:0010629; GO:0015935; GO:0016567; GO:0017148; GO:0019899; GO:0019903; GO:0022627; GO:0030178; GO:0030292; GO:0030308; GO:0030332; GO:0030335; GO:0030425; GO:0030496; GO:0030971; GO:0031334; GO:0032091; GO:0032436; GO:…	R-MMU-5357905;R-MMU-5357956;R-MMU-5626978;	mmu:14694;	18.1959	18.3059	18.039	18.284	18.2579	17.8557	17.9201	18.0245	17.9945	18.05
Atp6v1h_Q8BVE3	0.336408	1.26985	-0.00220234	0.625011	1.77865	-0.674041	-0.857344	-0.537783	-0.543533	-1.39501	Atp6v1h	V-type proton ATPase subunit H	Q8BVE3	1.01288	0.00181927	0.0412362	0.20475	sp|Q8BVE3|VATH_MOUSE V-type proton ATPase subunit H OS=Mus musculus OX=10090 GN=Atp6v1h PE=1 SV=1	FUNCTION: Subunit of the peripheral V1 complex of vacuolar ATPase. Subunit H activates the ATPase activity of the enzyme and couples ATPase activity to proton flow. Vacuolar ATPase is responsible for acidifying a variety of intracellular compartments in eukaryotic cells, thus providing most of the energy required for transport processes in the vacuolar system. Involved in the endocytosis mediated…			endocytosis [GO:0006897]	proton-transporting ATPase activity, rotational mechanism [GO:0046961]	vacuolar proton-transporting V-type ATPase, V1 domain [GO:0000221]	GO:0000221; GO:0006897; GO:0046961	R-MMU-1222556;R-MMU-77387;R-MMU-917977;R-MMU-9639288;R-MMU-983712;	mmu:108664;	16.0429	16.1621	15.9996	16.0797	16.2271	15.9138	15.8904	15.9312	15.9305	15.8217
Arfgap1_Q9EPJ9	0.424198	1.43979	0.255382	1.25747	0.400539	-1.89073	-0.583014	-0.834717	-0.565147	0.0962319	Arfgap1	ADP-ribosylation factor GTPase-activating protein 1	Q9EPJ9	1.04073	0.00182002	0.0412362	0.487806	sp|Q9EPJ9|ARFG1_MOUSE ADP-ribosylation factor GTPase-activating protein 1 OS=Mus musculus OX=10090 GN=Arfgap1 PE=1 SV=2	FUNCTION: GTPase-activating protein (GAP) for the ADP ribosylation factor 1 (ARF1). Involved in membrane trafficking and /or vesicle transport. Promotes hydrolysis of the ARF1-bound GTP and thus, is required for the dissociation of coat proteins from Golgi-derived membranes and vesicles, a prerequisite for vesicle's fusion with target compartment. Probably regulates ARF1-mediated transport via it…	SUBCELLULAR LOCATION: Cytoplasm {ECO:0000250}. Golgi apparatus {ECO:0000250}. Note=Associates with the Golgi complex. {ECO:0000250}.		protein transport [GO:0015031]; regulation of ARF protein signal transduction [GO:0032012]; regulation of endocytosis [GO:0030100]; vesicle-mediated transport [GO:0016192]	GTPase activator activity [GO:0005096]; metal ion binding [GO:0046872]	Golgi membrane [GO:0000139]; postsynaptic density [GO:0014069]; synapse [GO:0045202]	GO:0000139; GO:0005096; GO:0014069; GO:0015031; GO:0016192; GO:0030100; GO:0032012; GO:0045202; GO:0046872	R-MMU-6807878;R-MMU-6811434;R-MMU-8856828;	mmu:228998;	12.3582	12.6861	12.3037	12.6273	12.3506	11.6109	12.0331	11.9518	12.0388	12.2524
Nid1_P10493	0.51539	0.921736	1.00425	1.40112	0.241837	-1.76631	-1.03026	-0.173876	-0.450358	-0.663529	Nid1	Nidogen-1	P10493	1.01004	0.0018353	0.0413282	0.183049	sp|P10493|NID1_MOUSE Nidogen-1 OS=Mus musculus OX=10090 GN=Nid1 PE=1 SV=2	FUNCTION: Sulfated glycoprotein widely distributed in basement membranes and tightly associated with laminin. Also binds to collagen IV and perlecan. It probably has a role in cell-extracellular matrix interactions.	SUBCELLULAR LOCATION: Secreted, extracellular space, extracellular matrix, basement membrane.		cell-matrix adhesion [GO:0007160]; extracellular matrix organization [GO:0030198]; glomerular basement membrane development [GO:0032836]; positive regulation of cell-substrate adhesion [GO:0010811]	calcium ion binding [GO:0005509]; collagen binding [GO:0005518]; extracellular matrix binding [GO:0050840]; laminin-1 binding [GO:0043237]; laminin binding [GO:0043236]; proteoglycan binding [GO:0043394]	basement membrane [GO:0005604]; cell periphery [GO:0071944]; collagen-containing extracellular matrix [GO:0062023]; extracellular matrix [GO:0031012]; extracellular region [GO:0005576]; plasma membrane [GO:0005886]	GO:0005509; GO:0005518; GO:0005576; GO:0005604; GO:0005886; GO:0007160; GO:0010811; GO:0030198; GO:0031012; GO:0032836; GO:0043236; GO:0043237; GO:0043394; GO:0050840; GO:0062023; GO:0071944	R-MMU-1474228;R-MMU-3000157;	mmu:18073;	18.3795	18.425	18.4342	18.4787	18.3488	18.1238	18.2063	18.3022	18.2712	18.2474
Cdk12_Q14AX6	0.689571	0.713606	0.387554	0.39401	1.56535	-0.428169	-0.0270944	-0.827129	-2	-0.413327	Cdk12	Cyclin-dependent kinase 12;PHD finger protein 20-like protein 1	Q14AX6	1.06131	0.00184529	0.0413282	0.723706	sp|Q14AX6|CDK12_MOUSE Cyclin-dependent kinase 12 OS=Mus musculus OX=10090 GN=Cdk12 PE=1 SV=2;sp|Q8CCJ9|P20L1_MOUSE PHD finger protein 20-like protein 1 OS=Mus musculus OX=10090 GN=Phf20l1 PE=1 SV=2	FUNCTION: Cyclin-dependent kinase that phosphorylates the C-terminal domain (CTD) of the large subunit of RNA polymerase II (POLR2A), thereby acting as a key regulator of transcription elongation. Regulates the expression of genes involved in DNA repair and is required for the maintenance of genomic stability. Preferentially phosphorylates 'Ser-5' in CTD repeats that are already phosphorylated at…	SUBCELLULAR LOCATION: Nucleus {ECO:0000250}. Nucleus speckle {ECO:0000250}. Note=Colocalized with nuclear speckles throughout interphase. {ECO:0000250}.		mRNA processing [GO:0006397]; negative regulation of stem cell differentiation [GO:2000737]; phosphorylation of RNA polymerase II C-terminal domain [GO:0070816]; positive regulation of transcription by RNA polymerase II [GO:0045944]; positive regulation of transcription elongation from RNA polymerase II promoter [GO:0032968]; protein autophosphorylation [GO:0046777]; protein phosphorylation [GO:0…	ATP binding [GO:0005524]; cyclin binding [GO:0030332]; cyclin-dependent protein serine/threonine kinase activity [GO:0004693]; protein kinase activity [GO:0004672]; protein kinase binding [GO:0019901]; RNA polymerase II CTD heptapeptide repeat kinase activity [GO:0008353]	chromosome [GO:0005694]; cyclin/CDK positive transcription elongation factor complex [GO:0008024]; cyclin-dependent protein kinase holoenzyme complex [GO:0000307]; cyclin K-CDK12 complex [GO:0002944]; nuclear chromatin [GO:0000790]; nuclear cyclin-dependent protein kinase holoenzyme complex [GO:0019908]; nuclear speck [GO:0016607]; nucleoplasm [GO:0005654]; nucleus [GO:0005634]	GO:0000307; GO:0000790; GO:0002944; GO:0004672; GO:0004693; GO:0005524; GO:0005634; GO:0005654; GO:0005694; GO:0006368; GO:0006397; GO:0006468; GO:0008024; GO:0008353; GO:0008380; GO:0016607; GO:0019901; GO:0019908; GO:0030332; GO:0032968; GO:0043405; GO:0043484; GO:0045944; GO:0046777; GO:0070816; GO:2000737	R-MMU-6796648;	mmu:69131;	12.4979	12.5095	12.3522	12.3553	12.9205	11.9587	12.1522	11.7662	11.1741	11.9658
Man2b2_O54782	-0.658666	0.91775	0.757302	1.31169	1.41416	-1.22866	-0.937265	-0.527983	-0.851027	-0.197294	Man2b2	Epididymis-specific alpha-mannosidase	O54782	1.06877	0.00187467	0.0417462	0.822251	sp|O54782|MA2B2_MOUSE Epididymis-specific alpha-mannosidase OS=Mus musculus OX=10090 GN=Man2b2 PE=1 SV=2	FUNCTION: Plays an important role in the early step of spermatogenesis.	SUBCELLULAR LOCATION: Secreted.		mannose metabolic process [GO:0006013]	alpha-mannosidase activity [GO:0004559]; carbohydrate binding [GO:0030246]; metal ion binding [GO:0046872]	extracellular region [GO:0005576]; lysosome [GO:0005764]; vacuolar membrane [GO:0005774]	GO:0004559; GO:0005576; GO:0005764; GO:0005774; GO:0006013; GO:0030246; GO:0046872	R-MMU-8853383;	mmu:17160;	12.0051	12.871	12.7829	13.0874	13.1437	11.692	11.8521	12.0769	11.8994	12.2585
Gnas_P63094	0.460219	0.128796	0.453227	1.66592	1.17766	-1.64118	-1.04603	-0.573543	-0.0979779	-0.527097	Gnas	Guanine nucleotide-binding protein G(s) subunit alpha isoforms short;Guanine nucleotide-binding protein G(s) subunit alpha isoforms XLas	P63094	1.01545	0.00189752	0.0420149	0.260456	sp|P63094|GNAS2_MOUSE Guanine nucleotide-binding protein G(s) subunit alpha isoforms short OS=Mus musculus OX=10090 GN=Gnas PE=1 SV=1;sp|Q6R0H7|GNAS1_MOUSE Guanine nucleotide-binding protein G(s) subunit alpha isoforms XLas OS=Mus musculus OX=10090 GN=Gnas	FUNCTION: Guanine nucleotide-binding proteins (G proteins) function as transducers in numerous signaling pathways controlled by G protein-coupled receptors (GPCRs). Signaling involves the activation of adenylyl cyclases, resulting in increased levels of the signaling molecule cAMP. GNAS functions downstream of several GPCRs, including beta-adrenergic receptors. Stimulates the Ras signaling pathwa…	SUBCELLULAR LOCATION: Cell membrane {ECO:0000269|PubMed:8227063}; Lipid-anchor {ECO:0000269|PubMed:8227063}.		adenylate cyclase-activating adrenergic receptor signaling pathway [GO:0071880]; adenylate cyclase-activating dopamine receptor signaling pathway [GO:0007191]; adenylate cyclase-activating G protein-coupled receptor signaling pathway [GO:0007189]; adenylate cyclase-modulating G protein-coupled receptor signaling pathway [GO:0007188]; bone development [GO:0060348]; calcium ion homeostasis [GO:0055…	adenylate cyclase activator activity [GO:0010856]; alkylglycerophosphoethanolamine phosphodiesterase activity [GO:0047391]; alpha-tubulin binding [GO:0043014]; beta-2 adrenergic receptor binding [GO:0031698]; corticotropin-releasing hormone receptor 1 binding [GO:0051430]; D1 dopamine receptor binding [GO:0031748]; G-protein alpha-subunit binding [GO:0001965]; G-protein beta/gamma-subunit complex…	COPI-coated Golgi to ER transport vesicle [GO:0030142]; cytoplasm [GO:0005737]; cytosol [GO:0005829]; dendrite [GO:0030425]; endosome [GO:0005768]; heterotrimeric G-protein complex [GO:0005834]; intrinsic component of membrane [GO:0031224]; membrane [GO:0016020]; membrane raft [GO:0045121]; neuronal cell body [GO:0043025]; nucleus [GO:0005634]; perinuclear region of cytoplasm [GO:0048471]; plasma…	GO:0001501; GO:0001664; GO:0001726; GO:0001894; GO:0001934; GO:0001958; GO:0001965; GO:0003924; GO:0005159; GO:0005525; GO:0005634; GO:0005737; GO:0005768; GO:0005829; GO:0005834; GO:0005886; GO:0006112; GO:0006306; GO:0006357; GO:0007186; GO:0007188; GO:0007189; GO:0007191; GO:0007606; GO:0008284; GO:0009791; GO:0009966; GO:0010765; GO:0010856; GO:0016020; GO:0019904; GO:0030142; GO:0030425; GO:…		mmu:14683;	17.0669	17.0114	17.0658	17.269	17.1871	16.7148	16.8145	16.8937	16.9734	16.9015
Nif3l1_Q9EQ80	-0.106086	1.08658	0.0631234	1.05926	1.72123	-1.02957	-1.38027	-0.612656	-0.231075	-0.57055	Nif3l1	NIF3-like protein 1	Q9EQ80	1.02503	0.00192027	0.0422263	0.323213	sp|Q9EQ80|NIF3L_MOUSE NIF3-like protein 1 OS=Mus musculus OX=10090 GN=Nif3l1 PE=1 SV=4	FUNCTION: May function as a transcriptional corepressor through its interaction with COPS2, negatively regulating the expression of genes involved in neuronal differentiation. {ECO:0000269|PubMed:12522100}.	SUBCELLULAR LOCATION: Cytoplasm {ECO:0000269|PubMed:12522100}. Nucleus {ECO:0000269|PubMed:12522100}. Note=Interaction with COPS2 may regulate localization to the nucleus. {ECO:0000269|PubMed:12522100}.		negative regulation of nucleic acid-templated transcription [GO:1903507]; neuron differentiation [GO:0030182]; positive regulation of transcription, DNA-templated [GO:0045893]	identical protein binding [GO:0042802]; transcription factor binding [GO:0008134]	cytoplasm [GO:0005737]; mitochondrion [GO:0005739]; nucleus [GO:0005634]	GO:0005634; GO:0005737; GO:0005739; GO:0008134; GO:0030182; GO:0042802; GO:0045893; GO:1903507		mmu:65102;	13.0532	13.3053	13.089	13.2995	13.4394	12.8581	12.784	12.9462	13.0268	12.9551
Fabp4_P04117	0.68455	0.587993	0.530541	1.65479	0.68612	-1.24054	-0.907294	-1.0506	-1.09815	0.152577	Fabp4	Fatty acid-binding protein, adipocyte	P04117	1.00785	0.00193585	0.0422263	0.168454	sp|P04117|FABP4_MOUSE Fatty acid-binding protein, adipocyte OS=Mus musculus OX=10090 GN=Fabp4 PE=1 SV=3	FUNCTION: Lipid transport protein in adipocytes. Binds both long chain fatty acids and retinoic acid. Delivers long-chain fatty acids and retinoic acid to their cognate receptors in the nucleus. {ECO:0000269|PubMed:12077340, ECO:0000269|PubMed:16574478, ECO:0000269|PubMed:17516629}.	SUBCELLULAR LOCATION: Cytoplasm {ECO:0000269|PubMed:17516629, ECO:0000269|PubMed:17761196}. Nucleus {ECO:0000269|PubMed:17516629, ECO:0000269|PubMed:17761196}. Note=Depending on the nature of the ligand, a conformation change exposes a nuclear localization motif and the protein is transported into the nucleus (PubMed:17516629). Subject to constitutive nuclear export (PubMed:17516629, PubMed:17761…		brown fat cell differentiation [GO:0050873]; cellular response to lithium ion [GO:0071285]; cellular response to tumor necrosis factor [GO:0071356]; cholesterol homeostasis [GO:0042632]; cytokine production [GO:0001816]; fatty acid metabolic process [GO:0006631]; long-chain fatty acid transport [GO:0015909]; negative regulation of protein kinase activity [GO:0006469]; negative regulation of trans…	hormone receptor binding [GO:0051427]; long-chain fatty acid binding [GO:0036041]; long-chain fatty acid transporter activity [GO:0005324]	cytoplasm [GO:0005737]; cytosol [GO:0005829]; nucleoplasm [GO:0005654]; nucleus [GO:0005634]	GO:0001816; GO:0005324; GO:0005634; GO:0005654; GO:0005737; GO:0005829; GO:0006469; GO:0006631; GO:0008284; GO:0009617; GO:0015909; GO:0036041; GO:0042632; GO:0045892; GO:0050729; GO:0050872; GO:0050873; GO:0051427; GO:0071285; GO:0071356; GO:0120162	R-MMU-163560;	mmu:11770;	21.6194	21.6096	21.6037	21.718	21.6196	21.4238	21.4576	21.4431	21.4382	21.5653
Tubb4b_P68372	0.662204	1.22401	0.338374	0.671841	1.22159	-1.19387	-1.68288	-0.023729	-0.554225	-0.663311	Tubb4b	Tubulin beta-4B chain;Tubulin beta-4A chain	P68372	1.00905	0.00193957	0.0422263	0.17296	sp|P68372|TBB4B_MOUSE Tubulin beta-4B chain OS=Mus musculus OX=10090 GN=Tubb4b PE=1 SV=1;sp|Q9D6F9|TBB4A_MOUSE Tubulin beta-4A chain OS=Mus musculus OX=10090 GN=Tubb4a PE=1 SV=3	FUNCTION: Tubulin is the major constituent of microtubules. It binds two moles of GTP, one at an exchangeable site on the beta chain and one at a non-exchangeable site on the alpha chain.	SUBCELLULAR LOCATION: Cytoplasm, cytoskeleton.		microtubule-based process [GO:0007017]; microtubule cytoskeleton organization [GO:0000226]; mitotic cell cycle [GO:0000278]	double-stranded RNA binding [GO:0003725]; GTPase activity [GO:0003924]; GTP binding [GO:0005525]; structural constituent of cytoskeleton [GO:0005200]	cytoplasm [GO:0005737]; microtubule [GO:0005874]; myelin sheath [GO:0043209]; tubulin complex [GO:0045298]	GO:0000226; GO:0000278; GO:0003725; GO:0003924; GO:0005200; GO:0005525; GO:0005737; GO:0005874; GO:0007017; GO:0043209; GO:0045298	R-MMU-190840;R-MMU-2132295;R-MMU-2467813;R-MMU-2500257;R-MMU-2565942;R-MMU-3371497;R-MMU-380259;R-MMU-380270;R-MMU-380284;R-MMU-380320;R-MMU-437239;R-MMU-5610787;R-MMU-5617833;R-MMU-5620912;R-MMU-5620924;R-MMU-5626467;R-MMU-5663220;R-MMU-6798695;R-MMU-6807878;R-MMU-6811434;R-MMU-6811436;R-MMU-68877;R-MMU-8852276;R-MMU-8854518;R-MMU-8955332;R-MMU-9646399;R-MMU-9648025;R-MMU-9668328;R-MMU-983189;	mmu:227613;	19.2587	19.3177	19.2247	19.2597	19.3174	19.0638	19.0125	19.1867	19.131	19.1195
Rmnd1_Q8CI78	-0.107835	1.13655	1.38226	0.891647	0.52555	-1.46268	-1.24288	-0.832451	0.239305	-0.529463	Rmnd1	Required for meiotic nuclear division protein 1 homolog	Q8CI78	1.02116	0.00195165	0.042235	0.312032	sp|Q8CI78|RMND1_MOUSE Required for meiotic nuclear division protein 1 homolog OS=Mus musculus OX=10090 GN=Rmnd1 PE=1 SV=1	FUNCTION: Required for mitochondrial translation, possibly by coordinating the assembly or maintenance of the mitochondrial ribosome. {ECO:0000250|UniProtKB:Q9NWS8}.	SUBCELLULAR LOCATION: Mitochondrion {ECO:0000250|UniProtKB:Q9NWS8}. Note=May be localized in mitochondrial RNA granules. {ECO:0000250|UniProtKB:Q9NWS8}.		positive regulation of mitochondrial translation [GO:0070131]; translation [GO:0006412]		mitochondrion [GO:0005739]	GO:0005739; GO:0006412; GO:0070131		mmu:66084;	14.8811	15.1347	15.1847	15.0847	15.0101	14.605	14.6498	14.7334	14.9518	14.7952
Mtco1_P00397	0.15537	1.346	0.346912	1.08531	0.847691	-1.83667	-0.959003	-0.922751	-0.0515563	-0.0113048	Mtco1	Cytochrome c oxidase subunit 1	P00397	1.02761	0.00196693	0.042235	0.403077	sp|P00397|COX1_MOUSE Cytochrome c oxidase subunit 1 OS=Mus musculus OX=10090 GN=Mtco1 PE=1 SV=2	FUNCTION: Component of the cytochrome c oxidase, the last enzyme in the mitochondrial electron transport chain which drives oxidative phosphorylation. The respiratory chain contains 3 multisubunit complexes succinate dehydrogenase (complex II, CII), ubiquinol-cytochrome c oxidoreductase (cytochrome b-c1 complex, complex III, CIII) and cytochrome c oxidase (complex IV, CIV), that cooperate to tran…	SUBCELLULAR LOCATION: Mitochondrion inner membrane {ECO:0000250|UniProtKB:P00396}; Multi-pass membrane protein {ECO:0000250|UniProtKB:P00396}.		aerobic respiration [GO:0009060]; aging [GO:0007568]; cerebellum development [GO:0021549]; electron transport coupled proton transport [GO:0015990]; mitochondrial electron transport, cytochrome c to oxygen [GO:0006123]; respiratory electron transport chain [GO:0022904]; response to copper ion [GO:0046688]; response to electrical stimulus [GO:0051602]; response to oxidative stress [GO:0006979]	cytochrome-c oxidase activity [GO:0004129]; heme binding [GO:0020037]; metal ion binding [GO:0046872]	integral component of membrane [GO:0016021]; mitochondrial inner membrane [GO:0005743]; mitochondrial respiratory chain complex III [GO:0005750]; mitochondrial respiratory chain complex IV [GO:0005751]; mitochondrion [GO:0005739]; respiratory chain complex IV [GO:0045277]	GO:0004129; GO:0005739; GO:0005743; GO:0005750; GO:0005751; GO:0006123; GO:0006979; GO:0007568; GO:0009060; GO:0015990; GO:0016021; GO:0020037; GO:0021549; GO:0022904; GO:0045277; GO:0046688; GO:0046872; GO:0051602	R-MMU-5628897;R-MMU-611105;	mmu:17708;	14.8403	15.1576	14.8914	15.0882	15.0248	14.3095	14.5434	14.553	14.7852	14.7959
Tcp1_P11983	0.152772	1.42408	0.140567	1.42076	0.93065	-1.01208	-0.652239	-1.46423	-0.405127	-0.53516	Tcp1	T-complex protein 1 subunit alpha	P11983	1.01041	0.00198595	0.042235	0.181623	sp|P11983|TCPA_MOUSE T-complex protein 1 subunit alpha OS=Mus musculus OX=10090 GN=Tcp1 PE=1 SV=3	FUNCTION: Component of the chaperonin-containing T-complex (TRiC), a molecular chaperone complex that assists the folding of proteins upon ATP hydrolysis. The TRiC complex mediates the folding of WRAP53/TCAB1, thereby regulating telomere maintenance. As part of the TRiC complex may play a role in the assembly of BBSome, a complex involved in ciliogenesis regulating transports vesicles to the cili…	SUBCELLULAR LOCATION: Cytoplasm, cytosol {ECO:0000250|UniProtKB:P17987}. Cytoplasm, cytoskeleton, microtubule organizing center, centrosome {ECO:0000250|UniProtKB:P17987}.		binding of sperm to zona pellucida [GO:0007339]; positive regulation of establishment of protein localization to telomere [GO:1904851]; positive regulation of telomerase activity [GO:0051973]; positive regulation of telomerase RNA localization to Cajal body [GO:1904874]; positive regulation of telomere maintenance via telomerase [GO:0032212]; protein folding [GO:0006457]; protein stabilization [G…	ATP binding [GO:0005524]; ubiquitin protein ligase binding [GO:0031625]; unfolded protein binding [GO:0051082]	acrosomal vesicle [GO:0001669]; cell body [GO:0044297]; centrosome [GO:0005813]; chaperonin-containing T-complex [GO:0005832]; Golgi apparatus [GO:0005794]; heterochromatin [GO:0000792]; microtubule [GO:0005874]; microtubule organizing center [GO:0005815]; myelin sheath [GO:0043209]; nuclear heterochromatin [GO:0005720]; pericentriolar material [GO:0000242]; zona pellucida receptor complex [GO:00…	GO:0000242; GO:0000792; GO:0001669; GO:0002199; GO:0005524; GO:0005720; GO:0005794; GO:0005813; GO:0005815; GO:0005832; GO:0005874; GO:0006457; GO:0007339; GO:0031625; GO:0032212; GO:0043209; GO:0044053; GO:0044297; GO:0050821; GO:0051082; GO:0051973; GO:0090666; GO:1901998; GO:1904851; GO:1904874; GO:2000109	R-MMU-390471;R-MMU-5620922;R-MMU-6814122;	mmu:21454;	17.5489	17.6908	17.5476	17.6904	17.6358	17.419	17.4591	17.3685	17.4867	17.4722
Art3_Q8R2G4	0.389395	0.19945	1.01303	1.06296	1.32111	-1.39227	-0.357842	-1.62886	-0.344079	-0.262884	Art3	Ecto-ADP-ribosyltransferase 3	Q8R2G4	1.01407	0.0019866	0.042235	0.204365	sp|Q8R2G4|NAR3_MOUSE Ecto-ADP-ribosyltransferase 3 OS=Mus musculus OX=10090 GN=Art3 PE=1 SV=2		SUBCELLULAR LOCATION: Cell membrane {ECO:0000250}; Lipid-anchor, GPI-anchor {ECO:0000250}.		peptidyl-arginine ADP-ribosylation [GO:0018120]; protein ADP-ribosylation [GO:0006471]	NAD+ ADP-ribosyltransferase activity [GO:0003950]; NAD+-protein-arginine ADP-ribosyltransferase activity [GO:0106274]; NADP+-protein-arginine ADP-ribosyltransferase activity [GO:0106275]	anchored component of membrane [GO:0031225]; plasma membrane [GO:0005886]	GO:0003950; GO:0005886; GO:0006471; GO:0018120; GO:0031225; GO:0106274; GO:0106275	R-MMU-163125;	mmu:109979;	14.6757	14.6514	14.7556	14.762	14.7951	14.4473	14.5799	14.417	14.5817	14.5921
Rasip1_Q3U0S6	-0.779326	0.995694	1.25161	1.15667	1.19226	-0.58563	-1.00782	-0.876274	-0.529756	-0.817431	Rasip1	Ras-interacting protein 1	Q3U0S6	1.01957	0.00201264	0.042235	0.317836	sp|Q3U0S6|RAIN_MOUSE Ras-interacting protein 1 OS=Mus musculus OX=10090 GN=Rasip1 PE=1 SV=3	FUNCTION: Required for the proper formation of vascular structures that develop via both vasculogenesis and angiogenesis. Acts as a critical and vascular-specific regulator of GTPase signaling, cell architecture, and adhesion, which is essential for endothelial cell morphogenesis and blood vessel tubulogenesis. Regulates the activity of Rho GTPases in part by recruiting ARHGAP29 and suppressing R…	SUBCELLULAR LOCATION: Cytoplasm, perinuclear region {ECO:0000250}. Golgi apparatus, Golgi stack {ECO:0000250}. Note=Associated with perinuclear vesicles. Is recruited to Golgi stacks by activated HRAS (By similarity). {ECO:0000250}.		angiogenesis [GO:0001525]; branching morphogenesis of an epithelial tube [GO:0048754]; negative regulation of autophagy [GO:0010507]; negative regulation of membrane permeability [GO:1905709]; negative regulation of Rho-dependent protein serine/threonine kinase activity [GO:2000299]; negative regulation of Rho protein signal transduction [GO:0035024]; positive regulation of cell population prolif…	GTPase binding [GO:0051020]; protein homodimerization activity [GO:0042803]; Ras GTPase binding [GO:0017016]	cell-cell junction [GO:0005911]; Golgi apparatus [GO:0005794]; Golgi stack [GO:0005795]; perinuclear region of cytoplasm [GO:0048471]; protein-containing complex [GO:0032991]	GO:0001525; GO:0001570; GO:0005794; GO:0005795; GO:0005911; GO:0007165; GO:0008284; GO:0010507; GO:0017016; GO:0032991; GO:0033625; GO:0035024; GO:0042803; GO:0043087; GO:0048471; GO:0048754; GO:0051020; GO:1905709; GO:2000299		mmu:69903;	16.2399	16.6094	16.6627	16.6429	16.6503	16.2802	16.1923	16.2197	16.2919	16.232
Ube3a_O08759	-0.287646	0.525775	0.793535	1.10983	1.796	-1.13199	-0.825037	-0.289489	-0.647734	-1.04323	Ube3a	Ubiquitin-protein ligase E3A	O08759	1.01454	0.00201397	0.042235	0.221872	sp|O08759|UBE3A_MOUSE Ubiquitin-protein ligase E3A OS=Mus musculus OX=10090 GN=Ube3a PE=1 SV=2	FUNCTION: E3 ubiquitin-protein ligase which accepts ubiquitin from an E2 ubiquitin-conjugating enzyme in the form of a thioester and transfers it to its substrates. Several substrates have been identified including the ARNTL/BMAL1, ARC, RAD23A and RAD23B, MCM7 (which is involved in DNA replication), annexin A1, the PML tumor suppressor, and the cell cycle regulator CDKN1B (PubMed:20211139, PubMed…	SUBCELLULAR LOCATION: Cytoplasm {ECO:0000269|PubMed:9182527}. Nucleus {ECO:0000269|PubMed:9182527}.		androgen receptor signaling pathway [GO:0030521]; cellular response to brain-derived neurotrophic factor stimulus [GO:1990416]; negative regulation of dendritic spine morphogenesis [GO:0061002]; ovarian follicle development [GO:0001541]; positive regulation of Golgi lumen acidification [GO:1905528]; positive regulation of phosphatidylinositol 3-kinase signaling [GO:0014068]; positive regulation o…	metal ion binding [GO:0046872]; transcription coactivator activity [GO:0003713]; ubiquitin protein ligase activity [GO:0061630]; ubiquitin-protein transferase activity [GO:0004842]	cytosol [GO:0005829]; nucleus [GO:0005634]; proteasome complex [GO:0000502]	GO:0000502; GO:0001541; GO:0003713; GO:0004842; GO:0005634; GO:0005829; GO:0006511; GO:0014068; GO:0016567; GO:0030521; GO:0031398; GO:0032570; GO:0035037; GO:0042220; GO:0042542; GO:0042752; GO:0045944; GO:0046872; GO:0048511; GO:0050847; GO:0051865; GO:0060736; GO:0061002; GO:0061630; GO:0070936; GO:1905528; GO:1990416; GO:2000058	R-MMU-983168;	mmu:22215;	15.3262	15.4408	15.4785	15.5231	15.6198	15.2073	15.2505	15.326	15.2755	15.2198
Cdh5_P55284	1.10707	0.81649	0.801345	0.124554	1.30748	-1.31311	-1.51947	-0.597931	-0.570736	-0.155702	Cdh5	Cadherin-5	P55284	1.01	0.00201743	0.042235	0.164377	sp|P55284|CADH5_MOUSE Cadherin-5 OS=Mus musculus OX=10090 GN=Cdh5 PE=1 SV=2	FUNCTION: Cadherins are calcium-dependent cell adhesion proteins (By similarity). They preferentially interact with themselves in a homophilic manner in connecting cells; cadherins may thus contribute to the sorting of heterogeneous cell types (By similarity). This cadherin may play an important role in endothelial cell biology through control of the cohesion and organization of the intercellular…	SUBCELLULAR LOCATION: Cell junction {ECO:0000269|PubMed:19635461}. Cell membrane {ECO:0000269|PubMed:19635461}; Single-pass type I membrane protein {ECO:0000269|PubMed:19635461}. Note=Found at cell-cell boundaries and probably at cell-matrix boundaries. KRIT1 and CDH5 reciprocally regulate their localization to endothelial cell-cell junctions (By similarity). {ECO:0000250|UniProtKB:P33151}.		adherens junction organization [GO:0034332]; bicellular tight junction assembly [GO:0070830]; blood vessel endothelial cell migration [GO:0043534]; blood vessel maturation [GO:0001955]; calcium-dependent cell-cell adhesion via plasma membrane cell adhesion molecules [GO:0016339]; cell-cell adhesion [GO:0098609]; cell-cell adhesion mediated by cadherin [GO:0044331]; cell-cell adhesion via plasma-m…	beta-catenin binding [GO:0008013]; BMP receptor binding [GO:0070700]; cadherin binding [GO:0045296]; calcium ion binding [GO:0005509]; fibrinogen binding [GO:0070051]; ion channel binding [GO:0044325]; protein phosphatase binding [GO:0019903]; protein tyrosine kinase binding [GO:1990782]; signaling receptor binding [GO:0005102]; vascular endothelial growth factor receptor 2 binding [GO:0043184]	adherens junction [GO:0005912]; bicellular tight junction [GO:0005923]; catenin complex [GO:0016342]; cell-cell junction [GO:0005911]; cell junction [GO:0030054]; cell periphery [GO:0071944]; cell surface [GO:0009986]; external side of plasma membrane [GO:0009897]; integral component of membrane [GO:0016021]; nuclear membrane [GO:0031965]; nucleoplasm [GO:0005654]; plasma membrane [GO:0005886]	GO:0000902; GO:0001932; GO:0001944; GO:0001955; GO:0005102; GO:0005509; GO:0005654; GO:0005886; GO:0005911; GO:0005912; GO:0005923; GO:0006874; GO:0007043; GO:0007156; GO:0007179; GO:0007275; GO:0008013; GO:0008285; GO:0009897; GO:0009986; GO:0010628; GO:0016021; GO:0016339; GO:0016342; GO:0019903; GO:0030054; GO:0030335; GO:0030513; GO:0031115; GO:0031334; GO:0031965; GO:0034332; GO:0035307; GO:…	R-MMU-418990;R-MMU-5218920;	mmu:12562;	16.6356	16.6069	16.6054	16.5385	16.6554	16.3964	16.376	16.4671	16.4698	16.5108
Plbd1_Q8VCI0	0.577974	0.428902	0.23205	1.02895	1.51437	-1.37151	-0.51449	-1.65472	-0.406328	0.164811	Plbd1	Phospholipase B-like 1;Phospholipase B-like 1 chain A;Phospholipase B-like 1 chain B;Phospholipase B-like 1 chain C	Q8VCI0	1.02602	0.00202667	0.042235	0.381557	sp|Q8VCI0|PLBL1_MOUSE Phospholipase B-like 1 OS=Mus musculus OX=10090 GN=Plbd1 PE=1 SV=1	FUNCTION: Exhibits weak phospholipase activity, acting on various phospholipids, including phosphatidylcholine, phosphatidylinositol, phosphatidylethanolamine and lysophospholipids. However, in view of the small size of the putative binding pocket, it has been proposed that it may act rather as an amidase or a peptidase (By similarity). {ECO:0000250}.	SUBCELLULAR LOCATION: Lysosome {ECO:0000250}.		phospholipid catabolic process [GO:0009395]	phospholipase activity [GO:0004620]	extracellular region [GO:0005576]; extracellular space [GO:0005615]; lysosome [GO:0005764]	GO:0004620; GO:0005576; GO:0005615; GO:0005764; GO:0009395	R-MMU-1482788;R-MMU-1482839;R-MMU-1482922;R-MMU-1483115;	mmu:66857;	15.0012	14.9636	14.9139	15.1149	15.2373	14.5095	14.7256	14.4381	14.7529	14.897
Masp2_Q91WP0	-0.159536	1.19948	0.164877	0.617969	1.93477	-1.14271	-0.932031	-0.608674	-0.175419	-0.898719	Masp2	Mannan-binding lectin serine protease 2;Mannan-binding lectin serine protease 2 A chain;Mannan-binding lectin serine protease 2 B chain	Q91WP0	1.03002	0.00209213	0.0432039	0.43743	sp|Q91WP0|MASP2_MOUSE Mannan-binding lectin serine protease 2 OS=Mus musculus OX=10090 GN=Masp2 PE=1 SV=1	FUNCTION: Serum protease that plays an important role in the activation of the complement system via mannose-binding lectin. After activation by auto-catalytic cleavage it cleaves C2 and C4, leading to their activation and to the formation of C3 convertase (By similarity). {ECO:0000250}.	SUBCELLULAR LOCATION: Secreted.		complement activation, classical pathway [GO:0006958]; complement activation, lectin pathway [GO:0001867]	calcium-dependent protein binding [GO:0048306]; calcium ion binding [GO:0005509]; complement component C4b binding [GO:0001855]; peptidase activity [GO:0008233]; serine-type endopeptidase activity [GO:0004252]	extracellular space [GO:0005615]	GO:0001855; GO:0001867; GO:0004252; GO:0005509; GO:0005615; GO:0006958; GO:0008233; GO:0048306	R-MMU-166662;R-MMU-166663;R-MMU-2855086;	mmu:17175;	14.7415	15.1371	14.8359	14.9678	15.351	14.4554	14.5167	14.6108	14.7369	14.5264
_Q9D735	-0.166261	0.941053	1.19745	1.6594	0.288672	-1.03885	-0.870951	-0.0259545	-1.05675	-0.927806		Uncharacterized protein C19orf43 homolog	Q9D735	1.01643	0.00210956	0.0432039	0.224325	sp|Q9D735|TRIR_MOUSE Telomerase RNA component interacting RNase OS=Mus musculus OX=10090 GN=Trir PE=1 SV=1	FUNCTION: Exoribonuclease that is part of the telomerase RNA 3' end processing complex and which has the ability to all four unpaired RNA nucleotides from 5' end or 3' end with higher efficiency for purine bases (By similarity). {ECO:0000250|UniProtKB:Q9BQ61}.			RNA phosphodiester bond hydrolysis, exonucleolytic [GO:0090503]; rRNA catabolic process [GO:0016075]	3'-5' exonuclease activity [GO:0008408]; 5'-3' exonuclease activity [GO:0008409]; RNA binding [GO:0003723]		GO:0003723; GO:0008408; GO:0008409; GO:0016075; GO:0090503		mmu:68544;	13.7452	13.9036	13.9403	14.0064	13.8103	13.6204	13.6444	13.7653	13.6179	13.6363
Col6a2_Q02788	-0.216856	0.83175	0.655224	1.47615	1.16067	-1.68983	-0.631783	-0.200339	-0.53155	-0.853432	Col6a2	Collagen alpha-2(VI) chain	Q02788	1.01267	0.00211462	0.0432039	0.23062	sp|Q02788|CO6A2_MOUSE Collagen alpha-2(VI) chain OS=Mus musculus OX=10090 GN=Col6a2 PE=1 SV=3	FUNCTION: Collagen VI acts as a cell-binding protein.	SUBCELLULAR LOCATION: Secreted, extracellular space, extracellular matrix {ECO:0000250}. Membrane {ECO:0000250}; Peripheral membrane protein {ECO:0000250}. Note=Recruited on membranes by CSPG4. {ECO:0000250}.		cell adhesion [GO:0007155]; response to glucose [GO:0009749]	collagen binding [GO:0005518]	collagen-containing extracellular matrix [GO:0062023]; collagen trimer [GO:0005581]; extracellular matrix [GO:0031012]; extracellular region [GO:0005576]; extracellular space [GO:0005615]; protein-containing complex [GO:0032991]; sarcolemma [GO:0042383]	GO:0005518; GO:0005576; GO:0005581; GO:0005615; GO:0007155; GO:0009749; GO:0031012; GO:0032991; GO:0042383; GO:0062023	R-MMU-1442490;R-MMU-1650814;R-MMU-186797;R-MMU-2022090;R-MMU-216083;R-MMU-3000178;R-MMU-419037;R-MMU-8948216;	mmu:12834;	18.2832	18.4379	18.4119	18.533	18.4865	18.0658	18.222	18.2856	18.2367	18.1892
Scpep1_Q920A5	1.39786	1.09925	0.665083	0.400936	0.663789	-1.27371	-1.12103	-1.32229	-0.389985	-0.119899	Scpep1	Retinoid-inducible serine carboxypeptidase	Q920A5	1.00933	0.00212309	0.0432039	0.152737	sp|Q920A5|RISC_MOUSE Retinoid-inducible serine carboxypeptidase OS=Mus musculus OX=10090 GN=Scpep1 PE=1 SV=2	FUNCTION: May be involved in vascular wall and kidney homeostasis.	SUBCELLULAR LOCATION: Secreted {ECO:0000305}.		negative regulation of blood pressure [GO:0045776]; positive regulation of blood vessel diameter [GO:0097755]; retinoic acid metabolic process [GO:0042573]	serine-type carboxypeptidase activity [GO:0004185]	cytosol [GO:0005829]; extracellular region [GO:0005576]	GO:0004185; GO:0005576; GO:0005829; GO:0042573; GO:0045776; GO:0097755		mmu:74617;	16.5676	16.5406	16.5014	16.4775	16.5013	16.3262	16.34	16.3219	16.4061	16.4305
Nln_Q91YP2	0.151253	0.478194	1.11321	1.42755	0.882594	-1.28384	-1.12702	-1.02078	-0.829729	0.208557	Nln	Neurolysin, mitochondrial	Q91YP2	1.0113	0.0021286	0.0432039	0.180837	sp|Q91YP2|NEUL_MOUSE Neurolysin, mitochondrial OS=Mus musculus OX=10090 GN=Nln PE=1 SV=1	FUNCTION: Hydrolyzes oligopeptides such as neurotensin, bradykinin and dynorphin A. {ECO:0000250}.	SUBCELLULAR LOCATION: Mitochondrion intermembrane space {ECO:0000250}. Cytoplasm {ECO:0000250}.		peptide metabolic process [GO:0006518]; proteolysis [GO:0006508]; regulation of gluconeogenesis [GO:0006111]; regulation of skeletal muscle fiber differentiation [GO:1902809]	metal ion binding [GO:0046872]; metalloendopeptidase activity [GO:0004222]; oligopeptidase activity [GO:0070012]; peptidase activity [GO:0008233]; peptide binding [GO:0042277]	cytosol [GO:0005829]; mitochondrial intermembrane space [GO:0005758]; mitochondrion [GO:0005739]; plasma membrane [GO:0005886]	GO:0004222; GO:0005739; GO:0005758; GO:0005829; GO:0005886; GO:0006111; GO:0006508; GO:0006518; GO:0008233; GO:0042277; GO:0046872; GO:0070012; GO:1902809	R-MMU-375276;	mmu:75805;	16.1159	16.1524	16.2233	16.2583	16.1975	15.9559	15.9734	15.9852	16.0065	16.1223
Fga_E9PV24	0.599	1.64663	1.55936	0.464346	-0.517025	-0.9614	-0.873858	-0.486011	-0.532178	-0.898858	Fga	Fibrinogen alpha chain;Fibrinopeptide A;Fibrinogen alpha chain	E9PV24	1.02464	0.00215243	0.0434613	0.432861	sp|E9PV24|FIBA_MOUSE Fibrinogen alpha chain OS=Mus musculus OX=10090 GN=Fga PE=1 SV=1	FUNCTION: Cleaved by the protease thrombin to yield monomers which, together with fibrinogen beta (FGB) and fibrinogen gamma (FGG), polymerize to form an insoluble fibrin matrix. Fibrin has a major function in hemostasis as one of the primary components of blood clots (PubMed:7649481). In addition, functions during the early stages of wound repair to stabilize the lesion and guide cell migration …	SUBCELLULAR LOCATION: Secreted {ECO:0000269|PubMed:7649481}.		adaptive immune response [GO:0002250]; blood coagulation [GO:0007596]; blood coagulation, common pathway [GO:0072377]; blood coagulation, fibrin clot formation [GO:0072378]; cell-matrix adhesion [GO:0007160]; cellular protein-containing complex assembly [GO:0034622]; fibrinolysis [GO:0042730]; induction of bacterial agglutination [GO:0043152]; innate immune response [GO:0045087]; negative regulat…	cell adhesion molecule binding [GO:0050839]; metal ion binding [GO:0046872]; signaling receptor binding [GO:0005102]; structural molecule activity [GO:0005198]	blood microparticle [GO:0072562]; cell cortex [GO:0005938]; cell surface [GO:0009986]; collagen-containing extracellular matrix [GO:0062023]; cytoplasm [GO:0005737]; external side of plasma membrane [GO:0009897]; extracellular space [GO:0005615]; fibrinogen complex [GO:0005577]; platelet alpha granule [GO:0031091]; rough endoplasmic reticulum [GO:0005791]; synapse [GO:0045202]	GO:0002250; GO:0005102; GO:0005198; GO:0005577; GO:0005615; GO:0005737; GO:0005791; GO:0005938; GO:0007160; GO:0007596; GO:0009897; GO:0009986; GO:0014911; GO:0031091; GO:0031639; GO:0034116; GO:0034622; GO:0042730; GO:0043152; GO:0045087; GO:0045202; GO:0045907; GO:0045921; GO:0046872; GO:0050714; GO:0050839; GO:0051258; GO:0051592; GO:0062023; GO:0065003; GO:0070374; GO:0070527; GO:0072377; GO:…	R-MMU-114608;R-MMU-140875;R-MMU-216083;R-MMU-354192;R-MMU-354194;R-MMU-372708;R-MMU-381426;R-MMU-5674135;R-MMU-5686938;R-MMU-8957275;	mmu:14161;	17.96	18.2621	18.2369	17.9211	17.6381	17.51	17.5352	17.6471	17.6338	17.528
Serpina6_Q06770	-0.207335	1.31309	0.946646	1.07312	0.667895	-1.65574	-1.14492	-0.819543	-0.0887627	-0.0844517	Serpina6	Corticosteroid-binding globulin	Q06770	1.02227	0.00217246	0.0436396	0.326437	sp|Q06770|CBG_MOUSE Corticosteroid-binding globulin OS=Mus musculus OX=10090 GN=Serpina6 PE=1 SV=1	FUNCTION: Major transport protein for glucocorticoids and progestins in the blood of almost all vertebrate species.	SUBCELLULAR LOCATION: Secreted.		glucocorticoid metabolic process [GO:0008211]; negative regulation of endopeptidase activity [GO:0010951]	serine-type endopeptidase inhibitor activity [GO:0004867]; steroid binding [GO:0005496]	extracellular space [GO:0005615]	GO:0004867; GO:0005496; GO:0005615; GO:0008211; GO:0010951	R-MMU-194002;	mmu:12401;	14.7769	15.104	15.0251	15.0524	14.9652	14.4653	14.5752	14.6452	14.8024	14.8033
Hspa12b_Q9CZJ2	0.338208	1.37497	0.919728	0.967235	0.798655	-1.25209	-0.354287	-0.625913	-1.3515	-0.815005	Hspa12b	Heat shock 70 kDa protein 12B	Q9CZJ2	1.00782	0.00221295	0.0439003	0.135412	sp|Q9CZJ2|HS12B_MOUSE Heat shock 70 kDa protein 12B OS=Mus musculus OX=10090 GN=Hspa12b PE=1 SV=1					ATP binding [GO:0005524]		GO:0005524	R-MMU-3371453;	mmu:72630;	17.4158	17.4956	17.4605	17.4642	17.4512	17.2934	17.3625	17.3416	17.2857	17.327
Rac2_Q05144	1.14656	1.19381	-0.449518	0.783131	1.05439	-1.03633	-0.730078	0.297467	-0.923445	-1.33599	Rac2	Ras-related C3 botulinum toxin substrate 2	Q05144	1.04211	0.00222608	0.0439003	0.515095	sp|Q05144|RAC2_MOUSE Ras-related C3 botulinum toxin substrate 2 OS=Mus musculus OX=10090 GN=Rac2 PE=1 SV=1	FUNCTION: Plasma membrane-associated small GTPase which cycles between an active GTP-bound and inactive GDP-bound state. In active state binds to a variety of effector proteins to regulate cellular responses, such as secretory processes, phagocytose of apoptotic cells and epithelial cell polarization. Augments the production of reactive oxygen species (ROS) by NADPH oxidase.	SUBCELLULAR LOCATION: Cytoplasm {ECO:0000250}. Membrane {ECO:0000250}; Lipid-anchor {ECO:0000250}. Note=Membrane-associated when activated. {ECO:0000250}.		actin cytoskeleton organization [GO:0030036]; actin filament organization [GO:0007015]; bone resorption [GO:0045453]; cell projection assembly [GO:0030031]; chemotaxis [GO:0006935]; cortical cytoskeleton organization [GO:0030865]; engulfment of apoptotic cell [GO:0043652]; establishment or maintenance of cell polarity [GO:0007163]; G protein-coupled receptor signaling pathway [GO:0007186]; lympho…	GTPase activity [GO:0003924]; GTP binding [GO:0005525]; protein kinase binding [GO:0019901]; protein kinase regulator activity [GO:0019887]	actin filament [GO:0005884]; cell cortex [GO:0005938]; cell projection [GO:0042995]; cytoplasm [GO:0005737]; cytoplasmic vesicle [GO:0031410]; cytoskeleton [GO:0005856]; cytosol [GO:0005829]; intracellular membrane-bounded organelle [GO:0043231]; lamellipodium [GO:0030027]; membrane [GO:0016020]; nuclear envelope [GO:0005635]; plasma membrane [GO:0005886]; vesicle [GO:0031982]	GO:0003924; GO:0005525; GO:0005635; GO:0005737; GO:0005829; GO:0005856; GO:0005884; GO:0005886; GO:0005938; GO:0006935; GO:0007015; GO:0007163; GO:0007186; GO:0008045; GO:0008284; GO:0008360; GO:0010592; GO:0010810; GO:0016020; GO:0016601; GO:0019887; GO:0019901; GO:0030027; GO:0030031; GO:0030036; GO:0030865; GO:0031410; GO:0031982; GO:0032956; GO:0042129; GO:0042995; GO:0043231; GO:0043304; GO:…	R-MMU-114604;R-MMU-1222556;R-MMU-1257604;R-MMU-194840;R-MMU-4086400;R-MMU-5668599;R-MMU-6811558;	mmu:19354;	12.8855	12.9018	12.3343	12.76	12.8537	12.1316	12.2374	12.5923	12.1706	12.0281
Snca_O55042	0.690095	0.0746991	0.90842	1.0225	1.21548	-0.655956	-1.87854	-0.469752	-0.991499	0.0845492	Snca	Alpha-synuclein	O55042	1.01397	0.00222794	0.0439003	0.222007	sp|O55042|SYUA_MOUSE Alpha-synuclein OS=Mus musculus OX=10090 GN=Snca PE=1 SV=2	FUNCTION: Neuronal protein that plays several roles in synaptic activity such as regulation of synaptic vesicle trafficking and subsequent neurotransmitter release. Participates as a monomer in synaptic vesicle exocytosis by enhancing vesicle priming, fusion and dilation of exocytotic fusion pores. Mechanistically, acts by increasing local Ca(2+) release from microdomains which is essential for t…	SUBCELLULAR LOCATION: Cytoplasm {ECO:0000269|PubMed:31034892}. Membrane {ECO:0000250|UniProtKB:P37840}. Nucleus {ECO:0000250|UniProtKB:P37840}. Cell junction, synapse {ECO:0000250|UniProtKB:P37840}. Secreted {ECO:0000250|UniProtKB:P37840}. Note=Membrane-bound in dopaminergic neurons. {ECO:0000250|UniProtKB:P37840}.		activation of cysteine-type endopeptidase activity involved in apoptotic process [GO:0006919]; adult locomotory behavior [GO:0008344]; aging [GO:0007568]; behavioral response to cocaine [GO:0048148]; cellular response to copper ion [GO:0071280]; cellular response to fibroblast growth factor stimulus [GO:0044344]; cellular response to oxidative stress [GO:0034599]; chemical synaptic transmission […	actin binding [GO:0003779]; alpha-tubulin binding [GO:0043014]; arachidonic acid binding [GO:0050544]; beta-tubulin binding [GO:0048487]; calcium ion binding [GO:0005509]; copper ion binding [GO:0005507]; cuprous ion binding [GO:1903136]; cysteine-type endopeptidase inhibitor activity involved in apoptotic process [GO:0043027]; dynein complex binding [GO:0070840]; enzyme binding [GO:0019899]; fer…	actin cytoskeleton [GO:0015629]; axon [GO:0030424]; axon terminus [GO:0043679]; cell cortex [GO:0005938]; cytoplasm [GO:0005737]; cytoplasmic vesicle membrane [GO:0030659]; cytoskeleton [GO:0005856]; cytosol [GO:0005829]; extracellular region [GO:0005576]; extracellular space [GO:0005615]; Golgi apparatus [GO:0005794]; growth cone [GO:0030426]; inclusion body [GO:0016234]; intracellular membrane-…	GO:0000149; GO:0000287; GO:0001774; GO:0001921; GO:0001933; GO:0001956; GO:0001963; GO:0003779; GO:0005507; GO:0005509; GO:0005543; GO:0005576; GO:0005615; GO:0005634; GO:0005640; GO:0005737; GO:0005739; GO:0005741; GO:0005743; GO:0005758; GO:0005759; GO:0005791; GO:0005794; GO:0005829; GO:0005840; GO:0005856; GO:0005886; GO:0005938; GO:0006631; GO:0006638; GO:0006644; GO:0006919; GO:0007006; GO:…		mmu:20617;	16.096	16.0086	16.1269	16.1431	16.1705	15.9049	15.7315	15.9314	15.8573	16.01
Abce1_P61222	0.00437092	1.21112	0.0080979	0.673207	1.98061	-0.608297	-0.827243	-1.08128	-0.617174	-0.743411	Abce1	ATP-binding cassette sub-family E member 1	P61222	1.01472	0.00224262	0.0439003	0.238651	sp|P61222|ABCE1_MOUSE ATP-binding cassette sub-family E member 1 OS=Mus musculus OX=10090 GN=Abce1 PE=1 SV=1	FUNCTION: Cotranslational quality control factor involved in the No-Go Decay (NGD) pathway (By similarity). Together with PELO and HBS1L, is required for 48S complex formation from 80S ribosomes and dissociation of vacant 80S ribosomes (By similarity). Together with PELO and HBS1L, recognizes stalled ribosomes and promotes dissociation of elongation complexes assembled on non-stop mRNAs; this tri…	SUBCELLULAR LOCATION: Cytoplasm {ECO:0000250}. Mitochondrion {ECO:0000250}. Note=Localized to clusters of virus formation at the plasma membrane. {ECO:0000250}.		negative regulation of endoribonuclease activity [GO:0060702]; ribosomal subunit export from nucleus [GO:0000054]; translational initiation [GO:0006413]; translational termination [GO:0006415]	ATPase activity [GO:0016887]; ATP binding [GO:0005524]; endoribonuclease inhibitor activity [GO:0060698]; iron ion binding [GO:0005506]; ribosomal small subunit binding [GO:0043024]	cytoplasm [GO:0005737]; cytosol [GO:0005829]; mitochondrion [GO:0005739]	GO:0000054; GO:0005506; GO:0005524; GO:0005737; GO:0005739; GO:0005829; GO:0006413; GO:0006415; GO:0016887; GO:0043024; GO:0060698; GO:0060702	R-MMU-8983711;R-MMU-909733;	mmu:24015;	16.3313	16.517	16.3319	16.4342	16.6354	16.237	16.2034	16.1643	16.2357	16.2163
C8b_Q8BH35	1.16491	1.00399	-0.197601	0.743115	1.00002	-0.472446	-0.488766	-0.603579	-2	-0.0983975	C8b	Complement component C8 beta chain	Q8BH35	1.05253	0.00224948	0.0439003	0.615695	sp|Q8BH35|CO8B_MOUSE Complement component C8 beta chain OS=Mus musculus OX=10090 GN=C8b PE=1 SV=1	FUNCTION: Constituent of the membrane attack complex (MAC) that plays a key role in the innate and adaptive immune response by forming pores in the plasma membrane of target cells. {ECO:0000250}.	SUBCELLULAR LOCATION: Secreted.		complement activation, alternative pathway [GO:0006957]; complement activation, classical pathway [GO:0006958]; cytolysis [GO:0019835]	protein-containing complex binding [GO:0044877]	extracellular region [GO:0005576]; extracellular space [GO:0005615]; membrane attack complex [GO:0005579]	GO:0005576; GO:0005579; GO:0005615; GO:0006957; GO:0006958; GO:0019835; GO:0044877	R-MMU-166665;R-MMU-977606;	mmu:110382;	12.5123	12.4457	11.9477	12.3376	12.444	11.8338	11.8271	11.7795	11.1796	11.9888
Hist1h1a_P43275	-0.604285	0.781496	1.38857	1.28117	0.896478	-0.990454	-0.02443	-1.22619	-0.887643	-0.614712	Hist1h1a	Histone H1.1	P43275	1.02862	0.00226349	0.0439003	0.423165	sp|P43275|H11_MOUSE Histone H1.1 OS=Mus musculus OX=10090 GN=Hist1h1a PE=1 SV=2	FUNCTION: Histone H1 protein binds to linker DNA between nucleosomes forming the macromolecular structure known as the chromatin fiber. Histones H1 are necessary for the condensation of nucleosome chains into higher-order structured fibers. Acts also as a regulator of individual gene transcription through chromatin remodeling, nucleosome spacing and DNA methylation (By similarity). {ECO:0000250}.	SUBCELLULAR LOCATION: Nucleus. Chromosome. Note=Mainly localizes in euchromatin. {ECO:0000250}.		chromosome condensation [GO:0030261]; negative regulation of chromatin silencing [GO:0031936]; negative regulation of DNA recombination [GO:0045910]; nucleosome assembly [GO:0006334]; nucleosome positioning [GO:0016584]; positive regulation of receptor-mediated endocytosis [GO:0048260]; regulation of transcription, DNA-templated [GO:0006355]; spermatogenesis [GO:0007283]	DNA binding [GO:0003677]; double-stranded DNA binding [GO:0003690]; heparin binding [GO:0008201]; nucleosomal DNA binding [GO:0031492]	cell surface [GO:0009986]; nuclear chromatin [GO:0000790]; nuclear euchromatin [GO:0005719]; nucleosome [GO:0000786]; nucleus [GO:0005634]; vesicle [GO:0031982]	GO:0000786; GO:0000790; GO:0003677; GO:0003690; GO:0005634; GO:0005719; GO:0006334; GO:0006355; GO:0007283; GO:0008201; GO:0009986; GO:0016584; GO:0030261; GO:0031492; GO:0031936; GO:0031982; GO:0045910; GO:0048260	R-MMU-140342;R-MMU-2559584;	mmu:80838;	14.8241	15.2157	15.3873	15.3569	15.2482	14.715	14.988	14.6484	14.744	14.8212
Eif6_O55135	-0.106243	0.188756	1.8771	1.13099	0.764329	-1.08686	-1.09445	-0.697207	-0.153291	-0.823121	Eif6	Eukaryotic translation initiation factor 6	O55135	1.01788	0.00226691	0.0439003	0.251254	sp|O55135|IF6_MOUSE Eukaryotic translation initiation factor 6 OS=Mus musculus OX=10090 GN=Eif6 PE=1 SV=2	FUNCTION: Binds to the 60S ribosomal subunit and prevents its association with the 40S ribosomal subunit to form the 80S initiation complex in the cytoplasm. Behaves as a stimulatory translation initiation factor downstream insulin/growth factors. Is also involved in ribosome biogenesis. Associates with pre-60S subunits in the nucleus and is involved in its nuclear export. Cytoplasmic release of …	SUBCELLULAR LOCATION: Cytoplasm. Nucleus, nucleolus. Note=Shuttles between cytoplasm and nucleus/nucleolus.		assembly of large subunit precursor of preribosome [GO:1902626]; gene silencing by miRNA [GO:0035195]; maturation of 5.8S rRNA [GO:0000460]; maturation of LSU-rRNA [GO:0000470]; mature ribosome assembly [GO:0042256]; miRNA mediated inhibition of translation [GO:0035278]; positive regulation of translation [GO:0045727]; regulation of fatty acid biosynthetic process [GO:0042304]; regulation of glyc…	ribosomal large subunit binding [GO:0043023]; ribosome binding [GO:0043022]; translation initiation factor activity [GO:0003743]	cytoplasm [GO:0005737]; cytosol [GO:0005829]; intermediate filament [GO:0005882]; lamin filament [GO:0005638]; nucleolus [GO:0005730]; nucleoplasm [GO:0005654]; nucleus [GO:0005634]; preribosome, large subunit precursor [GO:0030687]	GO:0000054; GO:0000460; GO:0000470; GO:0003743; GO:0005634; GO:0005638; GO:0005654; GO:0005730; GO:0005737; GO:0005829; GO:0005882; GO:0006110; GO:0030687; GO:0032868; GO:0035195; GO:0035278; GO:0042256; GO:0042304; GO:0043022; GO:0043023; GO:0045652; GO:0045727; GO:1902626; GO:2000377		mmu:16418;	14.1614	14.2095	14.4846	14.363	14.3033	14.0017	14.0004	14.0652	14.1538	14.0446
Snx5_Q9D8U8	0.630815	0.676407	1.33723	0.974471	0.393793	-1.41624	-1.21108	-1.32271	-0.149019	0.0863384	Snx5	Sorting nexin-5	Q9D8U8	1.01181	0.00227556	0.0439003	0.185826	sp|Q9D8U8|SNX5_MOUSE Sorting nexin-5 OS=Mus musculus OX=10090 GN=Snx5 PE=1 SV=1	FUNCTION: Involved in several stages of intracellular trafficking. Interacts with membranes containing phosphatidylinositol lipids. Acts in part as component of the retromer membrane-deforming SNX-BAR subcomplex. The SNX-BAR retromer mediates retrograde transport of cargo proteins from endosomes to the trans-Golgi network (TGN) and is involved in endosome-to-plasma membrane transport for cargo pr…	SUBCELLULAR LOCATION: Endosome {ECO:0000250|UniProtKB:Q9Y5X3}. Early endosome {ECO:0000250|UniProtKB:Q9Y5X3}. Early endosome membrane {ECO:0000250|UniProtKB:Q9Y5X3}; Peripheral membrane protein; Cytoplasmic side. Cell membrane {ECO:0000250|UniProtKB:Q9Y5X3}; Peripheral membrane protein; Cytoplasmic side {ECO:0000250|UniProtKB:Q9Y5X3}. Cytoplasmic vesicle membrane; Peripheral membrane protein; Cyt…		epidermal growth factor catabolic process [GO:0007174]; intracellular protein transport [GO:0006886]; negative regulation of blood pressure [GO:0045776]; pinocytosis [GO:0006907]; positive regulation of insulin receptor signaling pathway [GO:0046628]; positive regulation of renal sodium excretion [GO:0035815]; positive regulation of transcription, DNA-templated [GO:0045893]; retrograde transport,…	D1 dopamine receptor binding [GO:0031748]; dynactin binding [GO:0034452]; phosphatidylinositol-3,5-bisphosphate binding [GO:0080025]; phosphatidylinositol-4-phosphate binding [GO:0070273]; phosphatidylinositol-5-phosphate binding [GO:0010314]; phosphatidylinositol binding [GO:0035091]	brush border [GO:0005903]; cytoplasmic vesicle membrane [GO:0030659]; cytosol [GO:0005829]; early endosome membrane [GO:0031901]; endosome [GO:0005768]; extrinsic component of cytoplasmic side of plasma membrane [GO:0031234]; extrinsic component of endosome membrane [GO:0031313]; intracellular membrane-bounded organelle [GO:0043231]; macropinocytic cup [GO:0070685]; perinuclear region of cytoplas…	GO:0001726; GO:0001891; GO:0005768; GO:0005829; GO:0005903; GO:0006886; GO:0006907; GO:0007174; GO:0010314; GO:0030659; GO:0030904; GO:0031234; GO:0031313; GO:0031748; GO:0031901; GO:0034452; GO:0035091; GO:0035815; GO:0042147; GO:0043231; GO:0045776; GO:0045893; GO:0046628; GO:0048471; GO:0070273; GO:0070685; GO:0080025; GO:0097422	R-MMU-432722;	mmu:69178;	15.9016	15.9069	15.9834	15.9414	15.8742	15.6647	15.6884	15.6755	15.8114	15.8386
Pnkd_Q69ZP3	0.291706	0.851041	0.568918	0.931957	1.15137	-1.91041	-1.26099	-0.252361	-0.573171	0.201948	Pnkd	Probable hydrolase PNKD	Q69ZP3	1.0222	0.00230726	0.0442925	0.303638	sp|Q69ZP3|PNKD_MOUSE Probable hydrolase PNKD OS=Mus musculus OX=10090 GN=Pnkd PE=1 SV=2	FUNCTION: Probable hydrolase that plays an aggravative role in the development of cardiac hypertrophy via activation of the NF-kappa-B signaling pathway. {ECO:0000269|PubMed:17420335}.	SUBCELLULAR LOCATION: [Isoform 1]: Membrane; Peripheral membrane protein.; SUBCELLULAR LOCATION: [Isoform 2]: Cytoplasm. Nucleus.; SUBCELLULAR LOCATION: [Isoform 4]: Mitochondrion {ECO:0000250}.		methylglyoxal catabolic process to D-lactate via S-lactoyl-glutathione [GO:0019243]; negative regulation of neurotransmitter secretion [GO:0046929]; neuromuscular process controlling posture [GO:0050884]; regulation of dopamine metabolic process [GO:0042053]; regulation of synaptic transmission, dopaminergic [GO:0032225]	hydroxyacylglutathione hydrolase activity [GO:0004416]; metal ion binding [GO:0046872]	membrane [GO:0016020]; mitochondrion [GO:0005739]; nucleus [GO:0005634]	GO:0004416; GO:0005634; GO:0005739; GO:0016020; GO:0019243; GO:0032225; GO:0042053; GO:0046872; GO:0046929; GO:0050884		mmu:56695;	13.8854	13.9973	13.9409	14.0135	14.0574	13.4449	13.5749	13.7766	13.7124	13.8675
Capn1_O35350	0.218445	0.947105	1.14307	1.22514	0.631464	-1.39477	-0.460604	-1.51219	-0.606852	-0.190803	Capn1	Calpain-1 catalytic subunit	O35350	1.00965	0.00232156	0.0443486	0.156904	sp|O35350|CAN1_MOUSE Calpain-1 catalytic subunit OS=Mus musculus OX=10090 GN=Capn1 PE=1 SV=1	FUNCTION: Calcium-regulated non-lysosomal thiol-protease which catalyzes limited proteolysis of substrates involved in cytoskeletal remodeling and signal transduction. Proteolytically cleaves CTBP1 at 'Asn-375', 'Gly-388' and 'His-410'. {ECO:0000250|UniProtKB:P07384}.	SUBCELLULAR LOCATION: Cytoplasm {ECO:0000250|UniProtKB:P07384}. Cell membrane {ECO:0000250|UniProtKB:P07384}. Note=Translocates to the plasma membrane upon Ca(2+) binding. {ECO:0000250|UniProtKB:P07384}.		cellular response to hydrogen peroxide [GO:0070301]; mammary gland involution [GO:0060056]; negative regulation of actin filament polymerization [GO:0030837]; negative regulation of NIK/NF-kappaB signaling [GO:1901223]; positive regulation of cardiac muscle cell apoptotic process [GO:0010666]; positive regulation of leukocyte tethering or rolling [GO:1903238]; positive regulation of vascular perm…	calcium-dependent cysteine-type endopeptidase activity [GO:0004198]; calcium ion binding [GO:0005509]; cytoskeletal protein binding [GO:0008092]; enzyme binding [GO:0019899]	cytoplasm [GO:0005737]; cytosol [GO:0005829]; lysosome [GO:0005764]; membrane [GO:0016020]; mitochondrion [GO:0005739]; plasma membrane [GO:0005886]	GO:0004198; GO:0005509; GO:0005737; GO:0005739; GO:0005764; GO:0005829; GO:0005886; GO:0006508; GO:0008092; GO:0010666; GO:0016020; GO:0016540; GO:0019899; GO:0030837; GO:0032801; GO:0043117; GO:0050790; GO:0060056; GO:0070301; GO:0097264; GO:1901223; GO:1903238; GO:1990776	R-MMU-1474228;R-MMU-6798695;R-MMU-6809371;	mmu:12333;	16.3554	16.424	16.4425	16.4502	16.3943	16.2035	16.2914	16.1924	16.2777	16.3168
Lemd2_Q6DVA0	-0.255933	0.367246	1.66403	1.23105	0.846276	-0.857061	-1.11306	-1.04067	0.0195744	-0.861455	Lemd2	LEM domain-containing protein 2	Q6DVA0	1.01925	0.00236505	0.04446	0.245569	sp|Q6DVA0|LEMD2_MOUSE LEM domain-containing protein 2 OS=Mus musculus OX=10090 GN=Lemd2 PE=1 SV=1	FUNCTION: Involved in nuclear structure organization (PubMed:16339967). Required for maintaining the integrity of the nuclear envelope (By similarity). {ECO:0000250|UniProtKB:Q8NC56, ECO:0000269|PubMed:16339967}.; FUNCTION: Required for embryonic development and is involved in regulation of several signaling pathways such as MAPK and AKT (PubMed:25790465). Required for myoblast differentiation in…	SUBCELLULAR LOCATION: Nucleus inner membrane {ECO:0000269|PubMed:16339967, ECO:0000269|PubMed:17062158}; Multi-pass membrane protein {ECO:0000269|PubMed:16339967}. Note=Lamina-associated protein residing in the inner nuclear membrane (INM). Localized exclusively to the nuclear envelope, giving rise to a typical rim-like staining of the nuclear periphery.		heart formation [GO:0060914]; negative regulation of BMP signaling pathway [GO:0030514]; negative regulation of MAPK cascade [GO:0043409]; negative regulation of protein kinase B signaling [GO:0051898]; neurogenesis [GO:0022008]; nuclear envelope organization [GO:0006998]; protein localization to chromatin [GO:0071168]; skeletal muscle cell differentiation [GO:0035914]	chromatin DNA binding [GO:0031490]	chromatin [GO:0000785]; endoplasmic reticulum [GO:0005783]; integral component of nuclear inner membrane [GO:0005639]; nuclear membrane [GO:0031965]	GO:0000785; GO:0005639; GO:0005783; GO:0006998; GO:0022008; GO:0030514; GO:0031490; GO:0031965; GO:0035914; GO:0043409; GO:0051898; GO:0060914; GO:0071168	R-MMU-2980766;R-MMU-2995383;R-MMU-4419969;R-MMU-9668328;	mmu:224640;	12.84	12.9393	13.146	13.077	13.0156	12.7442	12.7034	12.715	12.8839	12.7435
Tollip_Q9QZ06	1.10979	1.44319	-0.345608	0.740313	0.927845	-1.2166	-1.33598	-0.865838	-0.366494	-0.0906224	Tollip	Toll-interacting protein	Q9QZ06	1.01545	0.00238661	0.04446	0.230774	sp|Q9QZ06|TOLIP_MOUSE Toll-interacting protein OS=Mus musculus OX=10090 GN=Tollip PE=1 SV=1	FUNCTION: Component of the signaling pathway of IL-1 and Toll-like receptors. Inhibits cell activation by microbial products. Recruits IRAK1 to the IL-1 receptor complex. Inhibits IRAK1 phosphorylation and kinase activity. Connects the ubiquitin pathway to autophagy by functioning as a ubiquitin-ATG8 family adapter and thus mediating autophagic clearance of ubiquitin conjugates. The TOLLIP-depend…	SUBCELLULAR LOCATION: Cytoplasm {ECO:0000305}.		autophagy [GO:0006914]; epithelial cell differentiation [GO:0030855]; inflammatory response [GO:0006954]; innate immune response [GO:0045087]; interleukin-1-mediated signaling pathway [GO:0070498]; phosphorylation [GO:0016310]; positive regulation of protein sumoylation [GO:0033235]; protein localization to endosome [GO:0036010]; signal transduction [GO:0007165]; ubiquitin-dependent protein catab…	interleukin-1, type I receptor binding [GO:0005150]; kinase binding [GO:0019900]; SUMO binding [GO:0032183]; Toll-like receptor binding [GO:0035325]; ubiquitin binding [GO:0043130]; ubiquitin conjugating enzyme binding [GO:0031624]; ubiquitin protein ligase binding [GO:0031625]	cytoplasm [GO:0005737]; nuclear body [GO:0016604]; perinuclear region of cytoplasm [GO:0048471]; protein-containing complex [GO:0032991]	GO:0005150; GO:0005737; GO:0006511; GO:0006914; GO:0006954; GO:0007165; GO:0016310; GO:0016604; GO:0019900; GO:0030855; GO:0031624; GO:0031625; GO:0032183; GO:0032991; GO:0033235; GO:0035325; GO:0036010; GO:0043130; GO:0045087; GO:0048471; GO:0070498	R-MMU-6798695;R-MMU-9020702;	mmu:54473;	15.2169	15.2665	15.0002	15.1619	15.1898	14.8706	14.8528	14.9228	14.9971	15.0382
Letmd1_Q924L1	0.768903	1.42488	0.163563	0.842015	0.640805	-1.6869	-1.39424	-0.47007	-0.444402	0.155441	Letmd1	LETM1 domain-containing protein 1	Q924L1	1.01361	0.00238664	0.04446	0.252524	sp|Q924L1|LTMD1_MOUSE LETM1 domain-containing protein 1 OS=Mus musculus OX=10090 GN=Letmd1 PE=1 SV=1	FUNCTION: Involved in tumorigenesis and may function as a negative regulator of the p53/TP53. {ECO:0000269|PubMed:12879013}.	SUBCELLULAR LOCATION: Mitochondrion outer membrane {ECO:0000250}; Single-pass membrane protein {ECO:0000250}.			ribosome binding [GO:0043022]	integral component of membrane [GO:0016021]; mitochondrial outer membrane [GO:0005741]; mitochondrion [GO:0005739]; nucleolus [GO:0005730]; nucleoplasm [GO:0005654]	GO:0005654; GO:0005730; GO:0005739; GO:0005741; GO:0016021; GO:0043022		mmu:68614;	18.8108	18.9186	18.7112	18.8228	18.7897	18.407	18.4551	18.6071	18.6113	18.7099
Lyrm2_Q8R033	0.308071	0.259797	1.14167	1.51133	0.631664	-1.7245	-0.97259	-0.945203	-0.193785	-0.0164551	Lyrm2	LYR motif-containing protein 2	Q8R033	1.01716	0.00241979	0.04446	0.241933	sp|Q8R033|LYRM2_MOUSE LYR motif-containing protein 2 OS=Mus musculus OX=10090 GN=Lyrm2 PE=3 SV=1						mitochondrion [GO:0005739]	GO:0005739		mmu:108755;	14.2712	14.2636	14.4021	14.4601	14.322	13.9521	14.0702	14.0745	14.1924	14.2203
Ldhd_Q7TNG8	-0.731163	0.826167	1.26301	1.48559	0.866724	-1.05761	-1.10284	-0.403012	-0.766561	-0.380316	Ldhd	Probable D-lactate dehydrogenase, mitochondrial	Q7TNG8	1.03109	0.00242102	0.04446	0.508225	sp|Q7TNG8|LDHD_MOUSE Probable D-lactate dehydrogenase, mitochondrial OS=Mus musculus OX=10090 GN=Ldhd PE=1 SV=1	FUNCTION: Involved in D-lactate, but not L-lactate catabolic process. {ECO:0000250|UniProtKB:Q86WU2}.	SUBCELLULAR LOCATION: Mitochondrion {ECO:0000269|PubMed:12127981}.		ATP biosynthetic process [GO:0006754]; lactate catabolic process [GO:1903457]	D-lactate dehydrogenase (cytochrome) activity [GO:0004458]; D-lactate dehydrogenase activity [GO:0008720]; FAD binding [GO:0071949]; flavin adenine dinucleotide binding [GO:0050660]	mitochondrial inner membrane [GO:0005743]; mitochondrion [GO:0005739]	GO:0004458; GO:0005739; GO:0005743; GO:0006754; GO:0008720; GO:0050660; GO:0071949; GO:1903457	R-MMU-1268020;	mmu:52815;	16.353	16.8863	17.0359	17.1121	16.9002	16.2412	16.2257	16.4654	16.3409	16.4732
Rnh1_Q91VI7	-0.0231324	1.66064	0.440992	1.23909	0.88667	-0.548915	-0.770524	-0.834075	-1.15242	-0.898324	Rnh1	Ribonuclease inhibitor	Q91VI7	1.00857	0.00244424	0.04446	0.149987	sp|Q91VI7|RINI_MOUSE Ribonuclease inhibitor OS=Mus musculus OX=10090 GN=Rnh1 PE=1 SV=1	FUNCTION: Ribonuclease inhibitor which inhibits RNASE1, RNASE2 and ANG. May play a role in redox homeostasis (By similarity). {ECO:0000250}.	SUBCELLULAR LOCATION: Cytoplasm {ECO:0000250}.		regulation of angiogenesis [GO:0045765]	ribonuclease inhibitor activity [GO:0008428]	angiogenin-PRI complex [GO:0032311]; cytosol [GO:0005829]; nucleoplasm [GO:0005654]	GO:0005654; GO:0005829; GO:0008428; GO:0032311; GO:0045765		mmu:107702;	17.5837	17.7339	17.6251	17.6963	17.6648	17.5368	17.517	17.5114	17.483	17.5056
Eef1g_Q9D8N0	-0.426162	1.734	0.285667	1.09572	1.19324	-0.778268	-0.963683	-0.69022	-0.872032	-0.578257	Eef1g	Elongation factor 1-gamma	Q9D8N0	1.01256	0.00245484	0.04446	0.223548	sp|Q9D8N0|EF1G_MOUSE Elongation factor 1-gamma OS=Mus musculus OX=10090 GN=Eef1g PE=1 SV=3	FUNCTION: Probably plays a role in anchoring the complex to other cellular components. {ECO:0000250}.			glutathione metabolic process [GO:0006749]; response to virus [GO:0009615]; translational elongation [GO:0006414]	translation elongation factor activity [GO:0003746]	cytoplasm [GO:0005737]; endoplasmic reticulum [GO:0005783]; nucleus [GO:0005634]	GO:0003746; GO:0005634; GO:0005737; GO:0005783; GO:0006414; GO:0006749; GO:0009615	R-MMU-156842;	mmu:67160;	17.8482	18.1592	17.9507	18.0673	18.0813	17.7975	17.7708	17.8102	17.784	17.8263
Apbb1ip_Q8R5A3	0.478454	0.583085	0.657169	1.84741	0.260712	-1.40584	-0.0197089	-1.42867	-0.603488	-0.369127	Apbb1ip	Amyloid beta A4 precursor protein-binding family B member 1-interacting protein	Q8R5A3	1.02158	0.00245636	0.04446	0.256975	sp|Q8R5A3|AB1IP_MOUSE Amyloid beta A4 precursor protein-binding family B member 1-interacting protein OS=Mus musculus OX=10090 GN=Apbb1ip PE=1 SV=2	FUNCTION: Appears to function in the signal transduction from Ras activation to actin cytoskeletal remodeling. Suppresses insulin-induced promoter activities through AP1 and SRE. Mediates Rap1-induced adhesion (By similarity). {ECO:0000250}.	SUBCELLULAR LOCATION: Cell membrane {ECO:0000269|PubMed:15642358}; Peripheral membrane protein {ECO:0000269|PubMed:15642358}. Cell projection, lamellipodium {ECO:0000269|PubMed:15642358}. Cell junction, focal adhesion {ECO:0000269|PubMed:15642358}. Cytoplasm, cytoskeleton {ECO:0000269|PubMed:15642358}. Note=Colocalizes with ENA/VASP proteins at lamellipodia tips and focal adhesions, and F-actin a…		positive regulation of cell adhesion [GO:0045785]; signal transduction [GO:0007165]; T cell activation via T cell receptor contact with antigen bound to MHC molecule on antigen presenting cell [GO:0002291]		cytoskeleton [GO:0005856]; cytosol [GO:0005829]; focal adhesion [GO:0005925]; lamellipodium [GO:0030027]; plasma membrane [GO:0005886]; T cell receptor complex [GO:0042101]	GO:0002291; GO:0005829; GO:0005856; GO:0005886; GO:0005925; GO:0007165; GO:0030027; GO:0042101; GO:0045785	R-MMU-354192;R-MMU-354194;R-MMU-372708;R-MMU-5674135;	mmu:54519;	12.1159	12.1335	12.1459	12.3458	12.0794	11.7996	12.0323	11.7958	11.9343	11.9736
Cdo1_P60334	-1.65032	-0.545632	-0.220298	-0.438108	-0.973286	0.16452	0.409051	0.248117	1.41044	1.59552	Cdo1	Cysteine dioxygenase type 1	P60334	1.01824	0.00245713	0.04446	-0.256299	sp|P60334|CDO1_MOUSE Cysteine dioxygenase type 1 OS=Mus musculus OX=10090 GN=Cdo1 PE=1 SV=1				lactation [GO:0007595]; L-cysteine catabolic process [GO:0019448]; L-cysteine catabolic process to taurine [GO:0019452]; response to amino acid [GO:0043200]; response to cAMP [GO:0051591]; response to ethanol [GO:0045471]; response to glucagon [GO:0033762]; response to glucocorticoid [GO:0051384]; response to organonitrogen compound [GO:0010243]; taurine biosynthetic process [GO:0042412]; taurine…	cysteine dioxygenase activity [GO:0017172]; ferrous iron binding [GO:0008198]; oxidoreductase activity, acting on single donors with incorporation of molecular oxygen, incorporation of two atoms of oxygen [GO:0016702]	cytosol [GO:0005829]; plasma membrane [GO:0005886]	GO:0005829; GO:0005886; GO:0007595; GO:0008198; GO:0010243; GO:0016702; GO:0017172; GO:0019448; GO:0019452; GO:0019530; GO:0033762; GO:0042412; GO:0043200; GO:0045471; GO:0051384; GO:0051591	R-MMU-1614558;	mmu:12583;	13.9012	14.0861	14.1406	14.1041	14.0145	14.205	14.2459	14.219	14.4136	14.4446
Dpm1_O70152	-0.346665	0.883687	0.719561	1.57242	0.977123	-0.720422	-0.372707	-0.215504	-1.65544	-0.84205	Dpm1	Dolichol-phosphate mannosyltransferase subunit 1	O70152	1.01963	0.00246523	0.04446	0.273658	sp|O70152|DPM1_MOUSE Dolichol-phosphate mannosyltransferase subunit 1 OS=Mus musculus OX=10090 GN=Dpm1 PE=1 SV=1	FUNCTION: Transfers mannose from GDP-mannose to dolichol monophosphate to form dolichol phosphate mannose (Dol-P-Man) which is the mannosyl donor in pathways leading to N-glycosylation, glycosyl phosphatidylinositol membrane anchoring, and O-mannosylation of proteins; catalytic subunit of the dolichol-phosphate mannose (DPM) synthase complex. {ECO:0000250}.	SUBCELLULAR LOCATION: Endoplasmic reticulum.		dolichol metabolic process [GO:0019348]; GDP-mannose metabolic process [GO:0019673]; GPI anchor biosynthetic process [GO:0006506]; protein mannosylation [GO:0035268]; protein O-linked mannosylation [GO:0035269]	alcohol binding [GO:0043178]; dolichyl-phosphate beta-D-mannosyltransferase activity [GO:0004582]; dolichyl-phosphate-mannose-protein mannosyltransferase activity [GO:0004169]; mannose binding [GO:0005537]	dolichol-phosphate-mannose synthase complex [GO:0033185]; endoplasmic reticulum [GO:0005783]; endoplasmic reticulum membrane [GO:0005789]; intracellular membrane-bounded organelle [GO:0043231]; membrane [GO:0016020]	GO:0004169; GO:0004582; GO:0005537; GO:0005783; GO:0005789; GO:0006506; GO:0016020; GO:0019348; GO:0019673; GO:0033185; GO:0035268; GO:0035269; GO:0043178; GO:0043231	R-MMU-162699;	mmu:13480;	14.0152	14.2363	14.2068	14.3601	14.2531	13.948	14.0105	14.0387	13.7799	13.9261
Cfi_Q61129	0.442307	1.53744	1.6643	0.406467	-0.222155	-0.22707	-0.881221	-0.786484	-0.702069	-1.23151	Cfi	Complement factor I;Complement factor I heavy chain;Complement factor I light chain	Q61129	1.01786	0.00247655	0.04446	0.254277	sp|Q61129|CFAI_MOUSE Complement factor I OS=Mus musculus OX=10090 GN=Cfi PE=1 SV=3	FUNCTION: Trypsin-like serine protease that plays an essential role in regulating the immune response by controlling all complement pathways. Inhibits these pathways by cleaving three peptide bonds in the alpha-chain of C3b and two bonds in the alpha-chain of C4b thereby inactivating these proteins. Essential cofactors for these reactions include factor H and C4BP in the fluid phase and membrane …	SUBCELLULAR LOCATION: Secreted, extracellular space {ECO:0000250|UniProtKB:P05156}.		complement activation [GO:0006956]; complement activation, classical pathway [GO:0006958]; innate immune response [GO:0045087]	metal ion binding [GO:0046872]; scavenger receptor activity [GO:0005044]; serine-type endopeptidase activity [GO:0004252]	extracellular space [GO:0005615]; membrane [GO:0016020]; nucleus [GO:0005634]	GO:0004252; GO:0005044; GO:0005615; GO:0005634; GO:0006956; GO:0006958; GO:0016020; GO:0045087; GO:0046872	R-MMU-977606;	mmu:12630;	14.4377	14.6196	14.6406	14.4318	14.3274	14.3266	14.2179	14.2337	14.2477	14.1598
Supt5h_O55201	-0.22982	0.79426	1.47074	1.36432	0.523209	-1.01297	-0.18002	-0.583185	-0.675961	-1.47057	Supt5h	Transcription elongation factor SPT5	O55201	1.01476	0.00249231	0.04446	0.205157	sp|O55201|SPT5H_MOUSE Transcription elongation factor SPT5 OS=Mus musculus OX=10090 GN=Supt5h PE=1 SV=1	FUNCTION: Component of the DRB sensitivity-inducing factor complex (DSIF complex), which regulates mRNA processing and transcription elongation by RNA polymerase II. DSIF positively regulates mRNA capping by stimulating the mRNA guanylyltransferase activity of RNGTT/CAP1A. DSIF also acts cooperatively with the negative elongation factor complex (NELF complex) to enhance transcriptional pausing at…	SUBCELLULAR LOCATION: Nucleus {ECO:0000250}.		negative regulation of DNA-templated transcription, elongation [GO:0032785]; negative regulation of mRNA polyadenylation [GO:1900364]; negative regulation of transcription by RNA polymerase II [GO:0000122]; positive regulation of DNA-templated transcription, elongation [GO:0032786]; positive regulation of macroautophagy [GO:0016239]; positive regulation of transcription by RNA polymerase II [GO:0…	chromatin binding [GO:0003682]; enzyme binding [GO:0019899]; mRNA binding [GO:0003729]; protein heterodimerization activity [GO:0046982]	DSIF complex [GO:0032044]; nucleoplasm [GO:0005654]; nucleus [GO:0005634]	GO:0000122; GO:0003682; GO:0003729; GO:0005634; GO:0005654; GO:0006357; GO:0006368; GO:0016239; GO:0019899; GO:0032044; GO:0032785; GO:0032786; GO:0045944; GO:0046982; GO:1900364	R-MMU-112382;R-MMU-113418;R-MMU-674695;R-MMU-6796648;R-MMU-6807505;R-MMU-72086;R-MMU-75955;R-MMU-77075;	mmu:20924;	13.9734	14.1073	14.1957	14.1818	14.0718	13.871	13.9799	13.9272	13.915	13.8111
Ppp6c_Q9CQR6	-0.556657	0.833649	1.57375	1.43088	0.479716	-1.17508	-0.649556	-0.933454	-0.323262	-0.679984	Ppp6c	Serine/threonine-protein phosphatase 6 catalytic subunit;Serine/threonine-protein phosphatase 6 catalytic subunit, N-terminally processed	Q9CQR6	1.02327	0.00250221	0.04446	0.323796	sp|Q9CQR6|PPP6_MOUSE Serine/threonine-protein phosphatase 6 catalytic subunit OS=Mus musculus OX=10090 GN=Ppp6c PE=1 SV=1	FUNCTION: Catalytic subunit of protein phosphatase 6 (PP6). PP6 is a component of a signaling pathway regulating cell cycle progression in response to IL2 receptor stimulation. N-terminal domain restricts G1 to S phase progression in cancer cells, in part through control of cyclin D1. During mitosis, regulates spindle positioning. Downregulates MAP3K7 kinase activation of the IL1 signaling pathwa…	SUBCELLULAR LOCATION: Mitochondrion {ECO:0000250|UniProtKB:O00743}. Cytoplasm {ECO:0000250|UniProtKB:O00743}.		cell cycle [GO:0007049]; innate immune response [GO:0045087]; protein dephosphorylation [GO:0006470]	metal ion binding [GO:0046872]; protein serine/threonine phosphatase activity [GO:0004722]; protein serine phosphatase activity [GO:0106306]; protein threonine phosphatase activity [GO:0106307]	cytosol [GO:0005829]; mitochondrion [GO:0005739]	GO:0004722; GO:0005739; GO:0005829; GO:0006470; GO:0007049; GO:0045087; GO:0046872; GO:0106306; GO:0106307	R-MMU-171319;R-MMU-204005;	mmu:67857;	13.9547	14.2539	14.4131	14.3824	14.1777	13.8216	13.9347	13.8736	14.0049	13.9281
Oat_P29758	0.640952	0.57325	1.59562	1.24364	0.23764	-0.876813	-1.12975	-0.430617	-0.642042	-1.21188	Oat	Ornithine aminotransferase, mitochondrial	P29758	1.00867	0.00250433	0.04446	0.140439	sp|P29758|OAT_MOUSE Ornithine aminotransferase, mitochondrial OS=Mus musculus OX=10090 GN=Oat PE=1 SV=1		SUBCELLULAR LOCATION: Mitochondrion matrix {ECO:0000250|UniProtKB:P04181}.		arginine catabolic process to glutamate [GO:0019544]; arginine catabolic process to proline via ornithine [GO:0010121]; L-proline biosynthetic process [GO:0055129]	identical protein binding [GO:0042802]; ornithine(lysine) transaminase activity [GO:0050155]; ornithine-oxo-acid transaminase activity [GO:0004587]; pyridoxal phosphate binding [GO:0030170]	cytoplasm [GO:0005737]; mitochondrial matrix [GO:0005759]; mitochondrion [GO:0005739]; nucleoplasm [GO:0005654]	GO:0004587; GO:0005654; GO:0005737; GO:0005739; GO:0005759; GO:0010121; GO:0019544; GO:0030170; GO:0042802; GO:0050155; GO:0055129	R-MMU-8964539;	mmu:18242;	16.325	16.3195	16.4031	16.3743	16.292	16.2008	16.1801	16.2373	16.22	16.1734
Enpep_P16406	0.914666	-0.0392928	0.763992	1.51632	0.659821	-0.0736332	-1.01345	-1.25049	-1.49897	0.0210387	Enpep	Glutamyl aminopeptidase	P16406	1.01824	0.00251016	0.04446	0.261554	sp|P16406|AMPE_MOUSE Glutamyl aminopeptidase OS=Mus musculus OX=10090 GN=Enpep PE=1 SV=1	FUNCTION: Regulates central hypertension through its calcium-modulated preference to cleave N-terminal acidic residues from peptides such as angiotensin II. {ECO:0000250|UniProtKB:Q07075}.	SUBCELLULAR LOCATION: Cell membrane {ECO:0000250|UniProtKB:Q07075}; Single-pass type II membrane protein.		angiogenesis [GO:0001525]; cell migration [GO:0016477]; cell population proliferation [GO:0008283]; glomerulus development [GO:0032835]; peptide catabolic process [GO:0043171]; proteolysis [GO:0006508]; regulation of blood pressure [GO:0008217]; regulation of systemic arterial blood pressure by renin-angiotensin [GO:0003081]; signal transduction [GO:0007165]	aminopeptidase activity [GO:0004177]; metalloaminopeptidase activity [GO:0070006]; peptidase activity [GO:0008233]; peptide binding [GO:0042277]; zinc ion binding [GO:0008270]	apical part of cell [GO:0045177]; apical plasma membrane [GO:0016324]; brush border [GO:0005903]; brush border membrane [GO:0031526]; cytoplasm [GO:0005737]; cytoplasmic vesicle [GO:0031410]; external side of plasma membrane [GO:0009897]; integral component of membrane [GO:0016021]; plasma membrane [GO:0005886]	GO:0001525; GO:0003081; GO:0004177; GO:0005737; GO:0005886; GO:0005903; GO:0006508; GO:0007165; GO:0008217; GO:0008233; GO:0008270; GO:0008283; GO:0009897; GO:0016021; GO:0016324; GO:0016477; GO:0031410; GO:0031526; GO:0032835; GO:0042277; GO:0043171; GO:0045177; GO:0070006	R-MMU-2022377;	mmu:13809;	14.6245	14.461	14.5987	14.7276	14.5808	14.4551	14.2941	14.2534	14.2109	14.4713
Tpt1_P63028	-0.177848	1.50718	0.100783	1.26825	1.1494	-1.42104	-0.577469	-0.826909	-0.825673	-0.196674	Tpt1	Translationally-controlled tumor protein	P63028	1.01393	0.00252575	0.04446	0.23808	sp|P63028|TCTP_MOUSE Translationally-controlled tumor protein OS=Mus musculus OX=10090 GN=Tpt1 PE=1 SV=1	FUNCTION: Involved in calcium binding and microtubule stabilization. {ECO:0000250}.	SUBCELLULAR LOCATION: Cytoplasm {ECO:0000250}.		negative regulation of ectoderm development [GO:2000384]; negative regulation of intrinsic apoptotic signaling pathway in response to DNA damage [GO:1902230]; spermatogenesis [GO:0007283]; stem cell population maintenance [GO:0019827]	calcium ion binding [GO:0005509]; transcription factor binding [GO:0008134]	cytoplasm [GO:0005737]; cytoplasmic microtubule [GO:0005881]; cytosol [GO:0005829]; extracellular space [GO:0005615]; multivesicular body [GO:0005771]; nucleoplasm [GO:0005654]; nucleus [GO:0005634]; spindle pole [GO:0000922]	GO:0000922; GO:0005509; GO:0005615; GO:0005634; GO:0005654; GO:0005737; GO:0005771; GO:0005829; GO:0005881; GO:0007283; GO:0008134; GO:0019827; GO:1902230; GO:2000384		mmu:22070;	17.1822	17.4428	17.2253	17.4059	17.3875	16.9899	17.1204	17.0818	17.082	17.1793
Ube2o_Q6ZPJ3	0.42614	-0.108956	0.544383	1.64091	1.19976	-0.245491	-0.871186	-1.50315	-1.13856	0.0561498	Ube2o	E2/E3 hybrid ubiquitin-protein ligase UBE2O	Q6ZPJ3	1.04164	0.00253216	0.04446	0.494074	sp|Q6ZPJ3|UBE2O_MOUSE (E3-independent) E2 ubiquitin-conjugating enzyme UBE2O OS=Mus musculus OX=10090 GN=Ube2o PE=1 SV=3	FUNCTION: E2/E3 hybrid ubiquitin-protein ligase that displays both E2 and E3 ligase activities and mediates monoubiquitination of target proteins. Negatively regulates TRAF6-mediated NF-kappa-B activation independently of its E2 activity. Acts as a positive regulator of BMP7 signaling by mediating monoubiquitination of SMAD6, thereby regulating adipogenesis. Mediates monoubiquitination at differe…	SUBCELLULAR LOCATION: Cytoplasm {ECO:0000250|UniProtKB:Q9C0C9}. Nucleus {ECO:0000250|UniProtKB:Q9C0C9}. Note=Mainly localizes to the cytoplasm. {ECO:0000250|UniProtKB:Q9C0C9}.		negative regulation of apoptotic process [GO:0043066]; positive regulation of BMP signaling pathway [GO:0030513]; protein K63-linked ubiquitination [GO:0070534]; protein monoubiquitination [GO:0006513]; retrograde transport, endosome to Golgi [GO:0042147]	ATP binding [GO:0005524]; cysteine-type endopeptidase inhibitor activity [GO:0004869]; ubiquitin conjugating enzyme activity [GO:0061631]; ubiquitin protein ligase activity [GO:0061630]; ubiquitin-protein transferase activity [GO:0004842]	cytoplasm [GO:0005737]; cytosol [GO:0005829]; nuclear body [GO:0016604]; nucleoplasm [GO:0005654]; nucleus [GO:0005634]	GO:0004842; GO:0004869; GO:0005524; GO:0005634; GO:0005654; GO:0005737; GO:0005829; GO:0006513; GO:0016604; GO:0030513; GO:0042147; GO:0043066; GO:0061630; GO:0061631; GO:0070534	R-MMU-983168;	mmu:217342;	12.2551	12.0765	12.2945	12.6604	12.5132	12.031	11.8222	11.6114	11.733	12.1316
Kifap3_P70188	0.306427	0.831255	0.333204	0.897084	1.72032	-0.2253	-0.86697	-1.13859	-1.43665	-0.420776	Kifap3	Kinesin-associated protein 3	P70188	1.0121	0.00253275	0.04446	0.164206	sp|P70188|KIFA3_MOUSE Kinesin-associated protein 3 OS=Mus musculus OX=10090 GN=Kifap3 PE=1 SV=1	FUNCTION: Involved in tethering the chromosomes to the spindle pole and in chromosome movement. Binds to the tail domain of the KIF3A/KIF3B heterodimer to form a heterotrimeric KIF3 complex and may regulate the membrane binding of this complex.			cilium organization [GO:0044782]; microtubule-based movement [GO:0007018]; microtubule-based process [GO:0007017]; negative regulation of apoptotic process [GO:0043066]; negative regulation of cell population proliferation [GO:0008285]; positive regulation of calcium-dependent cell-cell adhesion [GO:0046587]; protein localization [GO:0008104]	intraciliary transport particle B binding [GO:0120170]; kinesin binding [GO:0019894]; protein phosphatase binding [GO:0019903]	axoneme [GO:0005930]; centrosome [GO:0005813]; ciliary basal body [GO:0036064]; ciliary transition zone [GO:0035869]; condensed nuclear chromosome [GO:0000794]; cytosol [GO:0005829]; endoplasmic reticulum [GO:0005783]; Golgi apparatus [GO:0005794]; kinesin II complex [GO:0016939]; microtubule cytoskeleton [GO:0015630]; periciliary membrane compartment [GO:1990075]; photoreceptor connecting cilium…	GO:0000794; GO:0005783; GO:0005794; GO:0005813; GO:0005829; GO:0005876; GO:0005930; GO:0007017; GO:0007018; GO:0008104; GO:0008285; GO:0015630; GO:0016939; GO:0019894; GO:0019903; GO:0032391; GO:0035869; GO:0036064; GO:0043066; GO:0044782; GO:0046587; GO:0120170; GO:1990075	R-MMU-2132295;R-MMU-5620924;R-MMU-6811434;R-MMU-983189;	mmu:16579;	13.686	13.7387	13.6887	13.7453	13.828	13.6326	13.5682	13.5409	13.511	13.613
Ppp4r2_Q0VGB7	0.841946	0.519895	0.692427	0.562501	1.27611	-0.960745	-1.13637	0.639421	-1.15354	-1.28166	Ppp4r2	Serine/threonine-protein phosphatase 4 regulatory subunit 2	Q0VGB7	1.0164	0.00255056	0.044572	0.214284	sp|Q0VGB7|PP4R2_MOUSE Serine/threonine-protein phosphatase 4 regulatory subunit 2 OS=Mus musculus OX=10090 GN=Ppp4r2 PE=1 SV=1	FUNCTION: Regulatory subunit of serine/threonine-protein phosphatase 4 (PP4). May regulate the activity of PPP4C at centrosomal microtubule organizing centers. Its interaction with the SMN complex leads to enhance the temporal localization of snRNPs, suggesting a role of PPP4C in maturation of spliceosomal snRNPs. The PPP4C-PPP4R2-PPP4R3A PP4 complex specifically dephosphorylates H2AX phosphoryla…	SUBCELLULAR LOCATION: Cytoplasm, cytoskeleton, microtubule organizing center, centrosome {ECO:0000250}. Nucleus {ECO:0000250}. Note=Ionizing radiation induces relocalization to nuclear foci and colocalization with RPA2. {ECO:0000250}.		hematopoietic progenitor cell differentiation [GO:0002244]; mRNA processing [GO:0006397]; protein dephosphorylation [GO:0006470]; regulation of double-strand break repair via homologous recombination [GO:0010569]; RNA splicing [GO:0008380]	protein-macromolecule adaptor activity [GO:0030674]; protein phosphatase regulator activity [GO:0019888]	cytoplasm [GO:0005737]; microtubule organizing center [GO:0005815]; nucleoplasm [GO:0005654]; nucleus [GO:0005634]; protein phosphatase 4 complex [GO:0030289]	GO:0002244; GO:0005634; GO:0005654; GO:0005737; GO:0005815; GO:0006397; GO:0006470; GO:0008380; GO:0010569; GO:0019888; GO:0030289; GO:0030674	R-MMU-5693607;	mmu:232314;	13.2922	13.2479	13.2717	13.2538	13.352	13.0442	13.02	13.2644	13.0176	13
Ephx1_Q9D379	-0.748388	0.987	1.59453	1.2897	0.599608	-0.876981	-0.59133	-0.510698	-0.893758	-0.849688	Ephx1	Epoxide hydrolase 1	Q9D379	1.02351	0.00257361	0.0445758	0.39353	sp|Q9D379|HYEP_MOUSE Epoxide hydrolase 1 OS=Mus musculus OX=10090 GN=Ephx1 PE=1 SV=2	FUNCTION: Biotransformation enzyme that catalyzes the hydrolysis of arene and aliphatic epoxides to less reactive and more water soluble dihydrodiols by the trans addition of water. May play a role in the metabolism of endogenous lipids such as epoxide-containing fatty acids. Metabolizes the abundant endocannabinoid 2-arachidonoylglycerol (2-AG) to free arachidonic acid (AA) and glycerol (By simi…	SUBCELLULAR LOCATION: Microsome membrane {ECO:0000250|UniProtKB:P07687}; Single-pass type III membrane protein {ECO:0000250|UniProtKB:P07687}. Endoplasmic reticulum membrane {ECO:0000250|UniProtKB:P07687}; Single-pass type III membrane protein {ECO:0000250|UniProtKB:P07687}.		arachidonic acid metabolic process [GO:0019369]; aromatic compound catabolic process [GO:0019439]; cellular aromatic compound metabolic process [GO:0006725]; cellular response to glucocorticoid stimulus [GO:0071385]; diol biosynthetic process [GO:0034312]; epoxide metabolic process [GO:0097176]; liver development [GO:0001889]; response to organic cyclic compound [GO:0014070]; response to toxic su…	cis-stilbene-oxide hydrolase activity [GO:0033961]; enzyme binding [GO:0019899]; epoxide hydrolase activity [GO:0004301]	endoplasmic reticulum membrane [GO:0005789]; integral component of membrane [GO:0016021]; intracellular membrane-bounded organelle [GO:0043231]; membrane [GO:0016020]; plasma membrane [GO:0005886]	GO:0001889; GO:0004301; GO:0005789; GO:0005886; GO:0006725; GO:0009636; GO:0014070; GO:0016020; GO:0016021; GO:0019369; GO:0019439; GO:0019899; GO:0033961; GO:0034312; GO:0043231; GO:0071385; GO:0097176	R-MMU-211945;	mmu:13849;	16.735	17.1936	17.3542	17.2736	17.0912	16.701	16.7765	16.7978	16.6965	16.7082
Ppcs_Q8VDG5	0.0367524	0.812224	0.90493	0.977858	1.37216	-1.53586	-1.27626	-0.138278	-0.643368	-0.510162	Ppcs	Phosphopantothenate--cysteine ligase	Q8VDG5	1.00983	0.00258386	0.0445758	0.160764	sp|Q8VDG5|PPCS_MOUSE Phosphopantothenate--cysteine ligase OS=Mus musculus OX=10090 GN=Ppcs PE=1 SV=1	FUNCTION: Catalyzes the second step in the biosynthesis of coenzyme A from vitamin B5, where cysteine is conjugated to 4'-phosphopantothenate to form 4-phosphopantothenoylcysteine. Has a preference for ATP over CTP as a cosubstrate. {ECO:0000250|UniProtKB:Q9HAB8}.			acetyl-CoA biosynthetic process [GO:0006085]; coenzyme A biosynthetic process [GO:0015937]; heart process [GO:0003015]	ATP binding [GO:0005524]; identical protein binding [GO:0042802]; phosphopantothenate--cysteine ligase activity [GO:0004632]; protein homodimerization activity [GO:0042803]	cytoplasm [GO:0005737]; nucleus [GO:0005634]	GO:0003015; GO:0004632; GO:0005524; GO:0005634; GO:0005737; GO:0006085; GO:0015937; GO:0042802; GO:0042803	R-MMU-196783;	mmu:106564;	16.4334	16.5094	16.5185	16.5256	16.5642	16.2794	16.3049	16.4163	16.3668	16.3799
Ctbp1_O88712	0.588223	0.524895	0.0831631	1.06832	1.67243	-0.994683	-1.69254	-0.468827	-0.555398	-0.225586	Ctbp1	C-terminal-binding protein 1;C-terminal-binding protein 2	O88712	1.01361	0.00259973	0.0445758	0.196425	sp|O88712|CTBP1_MOUSE C-terminal-binding protein 1 OS=Mus musculus OX=10090 GN=Ctbp1 PE=1 SV=2;sp|P56546|CTBP2_MOUSE C-terminal-binding protein 2 OS=Mus musculus OX=10090 GN=Ctbp2 PE=1 SV=2	FUNCTION: Corepressor targeting diverse transcription regulators such as GLIS2 or BCL6. Has dehydrogenase activity. Involved in controlling the equilibrium between tubular and stacked structures in the Golgi complex. Functions in brown adipose tissue (BAT) differentiation. {ECO:0000269|PubMed:10369679, ECO:0000269|PubMed:10567582, ECO:0000269|PubMed:16326862, ECO:0000269|PubMed:18483224, ECO:0000…	SUBCELLULAR LOCATION: Cytoplasm {ECO:0000250|UniProtKB:Q13363}. Nucleus {ECO:0000250|UniProtKB:Q13363}.		chromatin silencing [GO:0006342]; negative regulation of histone acetylation [GO:0035067]; negative regulation of histone H4 acetylation [GO:0090241]; negative regulation of transcription, DNA-templated [GO:0045892]; negative regulation of transcription by RNA polymerase II [GO:0000122]; positive regulation of histone deacetylation [GO:0031065]; presynapse to nucleus signaling pathway [GO:0099526…	chromatin binding [GO:0003682]; identical protein binding [GO:0042802]; NAD binding [GO:0051287]; oxidoreductase activity, acting on the CH-OH group of donors, NAD or NADP as acceptor [GO:0016616]; PDZ domain binding [GO:0030165]; protein domain specific binding [GO:0019904]; protein homodimerization activity [GO:0042803]; repressing transcription factor binding [GO:0070491]; RNA polymerase II tr…	cytoplasm [GO:0005737]; GABA-ergic synapse [GO:0098982]; glutamatergic synapse [GO:0098978]; nucleoplasm [GO:0005654]; nucleus [GO:0005634]; presynapse [GO:0098793]; presynaptic active zone cytoplasmic component [GO:0098831]; transcription repressor complex [GO:0017053]	GO:0000122; GO:0001226; GO:0003682; GO:0003714; GO:0005634; GO:0005654; GO:0005737; GO:0006342; GO:0008134; GO:0016616; GO:0017053; GO:0019904; GO:0030165; GO:0031065; GO:0035067; GO:0042802; GO:0042803; GO:0045892; GO:0050872; GO:0051287; GO:0051726; GO:0070491; GO:0090241; GO:0098793; GO:0098831; GO:0098978; GO:0098982; GO:0099526	R-MMU-3769402;R-MMU-3899300;R-MMU-4641265;	mmu:13016;	14.6085	14.6006	14.5455	14.6683	14.7437	14.411	14.324	14.4766	14.4658	14.5069
Prkar1a_Q9DBC7	0.557216	1.65409	0.12573	0.295082	1.15561	-1.16607	-1.08023	-0.805721	-1.09886	0.363152	Prkar1a	cAMP-dependent protein kinase type I-alpha regulatory subunit;cAMP-dependent protein kinase type I-alpha regulatory subunit, N-terminally processed	Q9DBC7	1.01818	0.0026218	0.0445758	0.276452	sp|Q9DBC7|KAP0_MOUSE cAMP-dependent protein kinase type I-alpha regulatory subunit OS=Mus musculus OX=10090 GN=Prkar1a PE=1 SV=3	FUNCTION: Regulatory subunit of the cAMP-dependent protein kinases involved in cAMP signaling in cells. {ECO:0000250}.	SUBCELLULAR LOCATION: Cell membrane {ECO:0000250}.		animal organ morphogenesis [GO:0009887]; cardiac muscle cell proliferation [GO:0060038]; cell population proliferation [GO:0008283]; female meiotic nuclear division [GO:0007143]; heart development [GO:0007507]; mesoderm formation [GO:0001707]; negative regulation of activated T cell proliferation [GO:0046007]; negative regulation of cAMP-dependent protein kinase activity [GO:2000480]; negative re…	cAMP binding [GO:0030552]; cAMP-dependent protein kinase inhibitor activity [GO:0004862]; cAMP-dependent protein kinase regulator activity [GO:0008603]; protein domain specific binding [GO:0019904]; protein kinase A catalytic subunit binding [GO:0034236]; ubiquitin protein ligase binding [GO:0031625]	axoneme [GO:0005930]; cAMP-dependent protein kinase complex [GO:0005952]; centrosome [GO:0005813]; cytoplasm [GO:0005737]; glutamatergic synapse [GO:0098978]; immunological synapse [GO:0001772]; multivesicular body [GO:0005771]; neuromuscular junction [GO:0031594]; nucleotide-activated protein kinase complex [GO:0031588]; plasma membrane raft [GO:0044853]; protein-containing complex [GO:0032991];…	GO:0001707; GO:0001772; GO:0004862; GO:0005737; GO:0005771; GO:0005813; GO:0005930; GO:0005952; GO:0006468; GO:0006469; GO:0007143; GO:0007507; GO:0008283; GO:0008603; GO:0009887; GO:0010738; GO:0019904; GO:0030552; GO:0031588; GO:0031594; GO:0031625; GO:0032991; GO:0034236; GO:0043949; GO:0044853; GO:0045202; GO:0045214; GO:0045835; GO:0045859; GO:0046007; GO:0060038; GO:0097224; GO:0098978; GO:…	R-MMU-163615;R-MMU-164378;R-MMU-180024;R-MMU-432040;R-MMU-442720;R-MMU-5610787;R-MMU-983231;	mmu:19084;	15.4469	15.6471	15.3682	15.3991	15.5561	15.1325	15.1481	15.1982	15.1447	15.4115
Lamb2_Q61292	-0.274994	0.9502	0.669528	1.47911	1.15586	-0.660015	-0.909389	-0.183374	-0.7436	-1.48333	Lamb2	Laminin subunit beta-2	Q61292	1.01018	0.00262564	0.0445758	0.18378	sp|Q61292|LAMB2_MOUSE Laminin subunit beta-2 OS=Mus musculus OX=10090 GN=Lamb2 PE=1 SV=2	FUNCTION: Binding to cells via a high affinity receptor, laminin is thought to mediate the attachment, migration and organization of cells into tissues during embryonic development by interacting with other extracellular matrix components. {ECO:0000269|PubMed:7885444}.; FUNCTION: Laminin-3 (S-laminin) regulates the formation of motor nerve terminals. {ECO:0000269|PubMed:7885444}.	SUBCELLULAR LOCATION: Secreted, extracellular space, extracellular matrix, basement membrane.		animal organ morphogenesis [GO:0009887]; astrocyte development [GO:0014002]; axon extension involved in regeneration [GO:0048677]; axon guidance [GO:0007411]; basement membrane assembly [GO:0070831]; cell migration [GO:0016477]; cell morphogenesis involved in differentiation [GO:0000904]; metanephric glomerular basement membrane development [GO:0072274]; metanephric glomerular visceral epithelial…	extracellular matrix structural constituent [GO:0005201]; integrin binding [GO:0005178]	basement membrane [GO:0005604]; collagen-containing extracellular matrix [GO:0062023]; extracellular region [GO:0005576]; laminin-3 complex [GO:0005608]; laminin complex [GO:0043256]; neuromuscular junction [GO:0031594]; synapse [GO:0045202]; synaptic cleft [GO:0043083]	GO:0000904; GO:0005178; GO:0005201; GO:0005576; GO:0005604; GO:0005608; GO:0007411; GO:0007528; GO:0007601; GO:0009887; GO:0009888; GO:0014002; GO:0014044; GO:0016477; GO:0031175; GO:0031594; GO:0034446; GO:0043083; GO:0043256; GO:0045202; GO:0048677; GO:0050808; GO:0060041; GO:0062023; GO:0070831; GO:0072249; GO:0072274	R-MMU-3000157;R-MMU-381426;R-MMU-8874081;R-MMU-8957275;	mmu:16779;	18.1123	18.2537	18.2213	18.3148	18.2775	18.0678	18.039	18.1229	18.0582	17.9728
Tdrp_Q8C5P7	-0.760981	-1.84756	0.024517	-1.23422	0.0534029	0.305773	0.659819	0.521191	0.932353	1.3457	Tdrp	Testis development-related protein	Q8C5P7	1.02556	0.00262754	0.0445758	-0.301519	sp|Q8C5P7|TDRP_MOUSE Testis development-related protein OS=Mus musculus OX=10090 GN=Tdrp PE=1 SV=1	FUNCTION: Contributes to normal sperm motility, but not essential for male fertility. {ECO:0000269|PubMed:27069551}.	SUBCELLULAR LOCATION: Nucleus {ECO:0000269|PubMed:27069551}. Cytoplasm {ECO:0000269|PubMed:27069551}. Note=Mainly nuclear. Also detected in cytoplasm near the midpiece of the flagellum. {ECO:0000269|PubMed:27069551}.		spermatogenesis [GO:0007283]		cytoplasm [GO:0005737]; cytosol [GO:0005829]; intracellular membrane-bounded organelle [GO:0043231]; nucleus [GO:0005634]	GO:0005634; GO:0005737; GO:0005829; GO:0007283; GO:0043231		mmu:72148;	11.7948	11.5773	11.9521	11.7001	11.9579	12.0084	12.0793	12.0515	12.1339	12.2166
Phpt1_Q9DAK9	0.434912	0.773018	0.560367	0.637202	1.41081	-0.454423	-1.83626	0.361442	-1.0252	-0.86187	Phpt1	14 kDa phosphohistidine phosphatase	Q9DAK9	1.01686	0.00263085	0.0445758	0.251746	sp|Q9DAK9|PHP14_MOUSE 14 kDa phosphohistidine phosphatase OS=Mus musculus OX=10090 GN=Phpt1 PE=1 SV=1	FUNCTION: Exhibits phosphohistidine phosphatase activity. {ECO:0000250|UniProtKB:Q9NRX4}.	SUBCELLULAR LOCATION: Cytoplasm {ECO:0000250}.		negative regulation of ATP citrate synthase activity [GO:2000984]; negative regulation of lyase activity [GO:0051350]; negative regulation of T cell receptor signaling pathway [GO:0050860]; peptidyl-histidine dephosphorylation [GO:0035971]; positive regulation of cell motility [GO:2000147]; positive regulation of insulin secretion involved in cellular response to glucose stimulus [GO:0035774]; pr…	calcium channel inhibitor activity [GO:0019855]; ion channel binding [GO:0044325]; protein histidine phosphatase activity [GO:0101006]	cytosol [GO:0005829]	GO:0005829; GO:0006470; GO:0019855; GO:0035774; GO:0035971; GO:0044325; GO:0050860; GO:0051350; GO:0101006; GO:2000147; GO:2000249; GO:2000984		mmu:75454;	15.1332	15.1889	15.1539	15.1665	15.2941	14.9865	14.7586	15.1211	14.8924	14.9193
Rps6kb2_Q9Z1M4	1.37601	0.475048	-0.0653253	0.774571	1.29119	-0.302013	-1.75209	-0.274731	-1.08827	-0.434383	Rps6kb2	Ribosomal protein S6 kinase beta-2;Ribosomal protein S6 kinase beta-1	Q9Z1M4	1.01676	0.00264977	0.044702	0.228913	sp|Q9Z1M4|KS6B2_MOUSE Ribosomal protein S6 kinase beta-2 OS=Mus musculus OX=10090 GN=Rps6kb2 PE=1 SV=1;sp|Q8BSK8|KS6B1_MOUSE Ribosomal protein S6 kinase beta-1 OS=Mus musculus OX=10090 GN=Rps6kb1 PE=1 SV=2	FUNCTION: Phosphorylates specifically ribosomal protein S6. Seems to act downstream of mTOR signaling in response to growth factors and nutrients to promote cell proliferation, cell growth and cell cycle progression in an alternative pathway regulated by MEAK7. {ECO:0000250|UniProtKB:Q9UBS0}.	SUBCELLULAR LOCATION: Cytoplasm {ECO:0000250}. Nucleus {ECO:0000250}.		intracellular signal transduction [GO:0035556]; positive regulation of translational initiation [GO:0045948]; protein kinase B signaling [GO:0043491]; protein phosphorylation [GO:0006468]; TOR signaling [GO:0031929]	ATP binding [GO:0005524]; peptide binding [GO:0042277]; protein kinase activity [GO:0004672]; protein serine/threonine kinase activity [GO:0004674]; protein serine kinase activity [GO:0106310]; protein threonine kinase activity [GO:0106311]; ribosomal protein S6 kinase activity [GO:0004711]	cytoplasm [GO:0005737]; nucleus [GO:0005634]	GO:0004672; GO:0004674; GO:0004711; GO:0005524; GO:0005634; GO:0005737; GO:0006468; GO:0031929; GO:0035556; GO:0042277; GO:0043491; GO:0045948; GO:0106310; GO:0106311	R-MMU-198693;	mmu:58988;	13.975	13.8412	13.7609	13.8857	13.9624	13.7257	13.5102	13.7298	13.6089	13.706
Rbbp4_Q60972	0.472065	0.303835	-0.00839036	2	0.846704	-0.450886	-0.894361	-0.726142	-0.606125	-1.12737	Rbbp4	Histone-binding protein RBBP4	Q60972	1.01845	0.00268861	0.0450177	0.256064	sp|Q60972|RBBP4_MOUSE Histone-binding protein RBBP4 OS=Mus musculus OX=10090 GN=Rbbp4 PE=1 SV=5	FUNCTION: Core histone-binding subunit that may target chromatin assembly factors, chromatin remodeling factors and histone deacetylases to their histone substrates in a manner that is regulated by nucleosomal DNA. Component of several complexes which regulate chromatin metabolism. These include the chromatin assembly factor 1 (CAF-1) complex, which is required for chromatin assembly following DN…	SUBCELLULAR LOCATION: Nucleus {ECO:0000250|UniProtKB:Q09028}. Note=Localizes to chromatin as part of the PRC2 complex. {ECO:0000250|UniProtKB:Q09028}.		cell cycle [GO:0007049]; chromatin assembly [GO:0031497]; chromatin remodeling [GO:0006338]; DNA replication [GO:0006260]; DNA replication-dependent nucleosome assembly [GO:0006335]; DNA replication-independent nucleosome assembly [GO:0006336]	DNA-dependent ATPase activity [GO:0008094]; histone deacetylase binding [GO:0042826]; RNA polymerase II cis-regulatory region sequence-specific DNA binding [GO:0000978]	CAF-1 complex [GO:0033186]; cytosol [GO:0005829]; ESC/E(Z) complex [GO:0035098]; nuclear chromatin [GO:0000790]; nucleoplasm [GO:0005654]; nucleus [GO:0005634]; NuRD complex [GO:0016581]; NURF complex [GO:0016589]; protein-containing complex [GO:0032991]	GO:0000790; GO:0000978; GO:0005634; GO:0005654; GO:0005829; GO:0006260; GO:0006335; GO:0006336; GO:0006338; GO:0007049; GO:0008094; GO:0016581; GO:0016589; GO:0031497; GO:0032991; GO:0033186; GO:0035098; GO:0042826	R-MMU-1538133;R-MMU-212300;R-MMU-2559580;R-MMU-3214815;R-MMU-3214841;R-MMU-606279;R-MMU-6804758;R-MMU-73762;R-MMU-8943724;R-MMU-8953750;	mmu:19646;	14.083	14.0547	14.0022	14.3722	14.146	13.9277	13.8531	13.8814	13.9016	13.8139
Tgm2_P21981	0.843019	1.42172	-0.0294764	0.935945	0.993235	-1.33226	-0.538183	-0.675057	-0.273802	-1.34514	Tgm2	Protein-glutamine gamma-glutamyltransferase 2	P21981	1.00852	0.00272401	0.0450177	0.150352	sp|P21981|TGM2_MOUSE Protein-glutamine gamma-glutamyltransferase 2 OS=Mus musculus OX=10090 GN=Tgm2 PE=1 SV=4	FUNCTION: Catalyzes the cross-linking of proteins, such as WDR54, and the conjugation of polyamines to proteins. {ECO:0000250|UniProtKB:P21980}.			apoptotic cell clearance [GO:0043277]; blood vessel remodeling [GO:0001974]; branching involved in salivary gland morphogenesis [GO:0060445]; G protein-coupled receptor signaling pathway [GO:0007186]; isopeptide cross-linking via N6-(L-isoglutamyl)-L-lysine [GO:0018153]; negative regulation of endoplasmic reticulum calcium ion concentration [GO:0032471]; peptide cross-linking [GO:0018149]; phosph…	calcium ion binding [GO:0005509]; GTP binding [GO:0005525]; identical protein binding [GO:0042802]; protein domain specific binding [GO:0019904]; protein-glutamine gamma-glutamyltransferase activity [GO:0003810]; transaminase activity [GO:0008483]	collagen-containing extracellular matrix [GO:0062023]; cytoplasm [GO:0005737]; cytosol [GO:0005829]; endoplasmic reticulum [GO:0005783]; extracellular matrix [GO:0031012]; intrinsic component of plasma membrane [GO:0031226]; membrane [GO:0016020]; mitochondrion [GO:0005739]; plasma membrane [GO:0005886]	GO:0001974; GO:0003810; GO:0005509; GO:0005525; GO:0005737; GO:0005739; GO:0005783; GO:0005829; GO:0005886; GO:0007186; GO:0007200; GO:0008483; GO:0016020; GO:0018149; GO:0018153; GO:0019904; GO:0031012; GO:0031226; GO:0032471; GO:0042802; GO:0043065; GO:0043123; GO:0043277; GO:0045785; GO:0048661; GO:0050729; GO:0051482; GO:0051561; GO:0060445; GO:0060662; GO:0062023		mmu:21817;	17.8048	17.8571	17.7261	17.8132	17.8184	17.6085	17.6802	17.6678	17.704	17.6073
Hdac6_Q9Z2V5	-0.825177	0.787673	1.22243	1.51195	1.01096	-0.814415	-0.85456	-0.530557	-0.958802	-0.549502	Hdac6	Histone deacetylase 6	Q9Z2V5	1.02796	0.00272906	0.0450177	0.395268	sp|Q9Z2V5|HDAC6_MOUSE Histone deacetylase 6 OS=Mus musculus OX=10090 GN=Hdac6 PE=1 SV=3	FUNCTION: Responsible for the deacetylation of lysine residues on the N-terminal part of the core histones (H2A, H2B, H3 and H4) (PubMed:9891014). Histone deacetylation gives a tag for epigenetic repression and plays an important role in transcriptional regulation, cell cycle progression and developmental events (PubMed:9891014). Histone deacetylases act via the formation of large multiprotein co…	SUBCELLULAR LOCATION: Cytoplasm {ECO:0000269|PubMed:19893491}. Cytoplasm, cytoskeleton {ECO:0000269|PubMed:19893491}. Nucleus {ECO:0000269|PubMed:19893491}. Perikaryon {ECO:0000269|PubMed:16933150}. Cell projection, dendrite {ECO:0000269|PubMed:16933150}. Cell projection, axon {ECO:0000269|PubMed:16933150}. Note=It is mainly cytoplasmic, where it is associated with microtubules. {ECO:0000269|PubM…		aggresome assembly [GO:0070842]; cellular response to hydrogen peroxide [GO:0070301]; cellular response to misfolded protein [GO:0071218]; cellular response to topologically incorrect protein [GO:0035967]; collateral sprouting [GO:0048668]; dendritic spine morphogenesis [GO:0060997]; histone deacetylation [GO:0016575]; Hsp90 deacetylation [GO:0070846]; intracellular protein transport [GO:0006886]…	actin binding [GO:0003779]; alpha-tubulin binding [GO:0043014]; beta-catenin binding [GO:0008013]; beta-tubulin binding [GO:0048487]; deacetylase activity [GO:0019213]; dynein complex binding [GO:0070840]; histone deacetylase activity [GO:0004407]; histone deacetylase binding [GO:0042826]; Hsp90 protein binding [GO:0051879]; microtubule binding [GO:0008017]; misfolded protein binding [GO:0051787]…	aggresome [GO:0016235]; axon [GO:0030424]; caveola [GO:0005901]; cell body [GO:0044297]; cell leading edge [GO:0031252]; centrosome [GO:0005813]; cytoplasm [GO:0005737]; cytosol [GO:0005829]; dendrite [GO:0030425]; dynein complex [GO:0030286]; histone deacetylase complex [GO:0000118]; inclusion body [GO:0016234]; microtubule [GO:0005874]; microtubule associated complex [GO:0005875]; microtubule c…	GO:0000118; GO:0000209; GO:0000978; GO:0001226; GO:0003779; GO:0004407; GO:0005634; GO:0005654; GO:0005737; GO:0005813; GO:0005829; GO:0005874; GO:0005875; GO:0005901; GO:0006476; GO:0006511; GO:0006515; GO:0006886; GO:0007026; GO:0008013; GO:0008017; GO:0008270; GO:0010634; GO:0015630; GO:0016234; GO:0016235; GO:0016241; GO:0016575; GO:0019213; GO:0030286; GO:0030424; GO:0030425; GO:0031252; GO:…	R-MMU-3371511;R-MMU-350054;R-MMU-5617833;R-MMU-9646399;	mmu:15185;	14.116	14.5458	14.6617	14.7388	14.6053	14.1188	14.1082	14.1945	14.0804	14.1895
Scfd1_Q8BRF7	-0.716861	0.436463	1.65793	1.2001	1.1288	-0.755991	-0.98227	-0.681294	-0.599521	-0.687364	Scfd1	Sec1 family domain-containing protein 1	Q8BRF7	1.02485	0.00274284	0.0450177	0.395823	sp|Q8BRF7|SCFD1_MOUSE Sec1 family domain-containing protein 1 OS=Mus musculus OX=10090 GN=Scfd1 PE=1 SV=1	FUNCTION: Plays a role in SNARE-pin assembly and Golgi-to-ER retrograde transport via its interaction with COG4. Involved in vesicular transport between the endoplasmic reticulum and the Golgi (By similarity). {ECO:0000250}.	SUBCELLULAR LOCATION: Cytoplasm {ECO:0000250}. Endoplasmic reticulum membrane {ECO:0000250}; Peripheral membrane protein {ECO:0000250}. Golgi apparatus, Golgi stack membrane {ECO:0000250}; Peripheral membrane protein {ECO:0000250}.		cell morphogenesis [GO:0000902]; endoplasmic reticulum to Golgi vesicle-mediated transport [GO:0006888]; intracellular protein transport [GO:0006886]; negative regulation of autophagosome assembly [GO:1902902]; post-Golgi vesicle-mediated transport [GO:0006892]; regulation of ER to Golgi vesicle-mediated transport [GO:0060628]; regulation of protein transport [GO:0051223]; response to hypoxia [GO…	protein-containing complex binding [GO:0044877]; protein N-terminus binding [GO:0047485]; syntaxin binding [GO:0019905]	cis-Golgi network [GO:0005801]; cytosol [GO:0005829]; endoplasmic reticulum membrane [GO:0005789]; Golgi-associated vesicle [GO:0005798]; Golgi cisterna membrane [GO:0032580]; Golgi membrane [GO:0000139]; plasma membrane [GO:0005886]	GO:0000139; GO:0000902; GO:0001666; GO:0005789; GO:0005798; GO:0005801; GO:0005829; GO:0005886; GO:0006886; GO:0006888; GO:0006890; GO:0006892; GO:0006904; GO:0009636; GO:0016192; GO:0019905; GO:0032580; GO:0044877; GO:0047485; GO:0051223; GO:0060628; GO:1901998; GO:1902902	R-MMU-204005;	mmu:76983;	15.938	16.2459	16.572	16.4498	16.4308	15.9276	15.8671	15.9475	15.9693	15.9459
Cat_P24270	1.10271	0.766682	0.759289	0.421664	1.13771	-1.53293	-0.109913	-1.40418	-0.28515	-0.855885	Cat	Catalase	P24270	1.0079	0.00275881	0.0450177	0.147175	sp|P24270|CATA_MOUSE Catalase OS=Mus musculus OX=10090 GN=Cat PE=1 SV=4	FUNCTION: Occurs in almost all aerobically respiring organisms and serves to protect cells from the toxic effects of hydrogen peroxide. Promotes growth of cells.	SUBCELLULAR LOCATION: Peroxisome.		aerobic respiration [GO:0009060]; aging [GO:0007568]; cellular response to growth factor stimulus [GO:0071363]; cholesterol metabolic process [GO:0008203]; hemoglobin metabolic process [GO:0020027]; hydrogen peroxide catabolic process [GO:0042744]; kidney development [GO:0001822]; negative regulation of apoptotic process [GO:0043066]; negative regulation of NF-kappaB transcription factor activity…	aminoacylase activity [GO:0004046]; antioxidant activity [GO:0016209]; catalase activity [GO:0004096]; enzyme binding [GO:0019899]; heme binding [GO:0020037]; identical protein binding [GO:0042802]; metal ion binding [GO:0046872]; NADP binding [GO:0050661]; oxidoreductase activity, acting on peroxide as acceptor [GO:0016684]; peroxisome targeting sequence binding [GO:0000268]; protein homodimeriz…	cytoplasm [GO:0005737]; cytosol [GO:0005829]; endoplasmic reticulum [GO:0005783]; extracellular space [GO:0005615]; Golgi apparatus [GO:0005794]; intracellular membrane-bounded organelle [GO:0043231]; lysosome [GO:0005764]; mitochondrial intermembrane space [GO:0005758]; mitochondrion [GO:0005739]; peroxisomal membrane [GO:0005778]; peroxisome [GO:0005777]; plasma membrane [GO:0005886]; protein-c…	GO:0000268; GO:0000302; GO:0001657; GO:0001666; GO:0001822; GO:0004046; GO:0004096; GO:0005615; GO:0005737; GO:0005739; GO:0005758; GO:0005764; GO:0005777; GO:0005778; GO:0005783; GO:0005794; GO:0005829; GO:0005886; GO:0006641; GO:0006979; GO:0007568; GO:0008203; GO:0009060; GO:0009642; GO:0009650; GO:0010193; GO:0010288; GO:0014068; GO:0014823; GO:0014854; GO:0016209; GO:0016684; GO:0019899; GO:…	R-MMU-3299685;R-MMU-6798695;R-MMU-9033241;	mmu:12359;	18.7915	18.762	18.7614	18.7317	18.7946	18.56	18.685	18.5713	18.6696	18.6195
Pls3_Q99K51	-0.538542	1.00843	1.29946	1.34576	0.67081	-1.53492	-0.715681	-0.731161	-0.309109	-0.495048	Pls3	Plastin-3	Q99K51	1.0158	0.00277625	0.0450177	0.264722	sp|Q99K51|PLST_MOUSE Plastin-3 OS=Mus musculus OX=10090 GN=Pls3 PE=1 SV=3	FUNCTION: Actin-bundling protein. {ECO:0000250}.	SUBCELLULAR LOCATION: Cytoplasm {ECO:0000250}.		actin filament bundle assembly [GO:0051017]; actin filament network formation [GO:0051639]; bone development [GO:0060348]; regulation of synaptic vesicle cycle [GO:0098693]	actin filament binding [GO:0051015]; calcium ion binding [GO:0005509]; structural constituent of presynaptic actin cytoskeleton [GO:0098699]	actin filament [GO:0005884]; actin filament bundle [GO:0032432]; cytoplasm [GO:0005737]; cytosol [GO:0005829]; neuromuscular junction [GO:0031594]; plasma membrane [GO:0005886]; stereocilium [GO:0032420]	GO:0005509; GO:0005737; GO:0005829; GO:0005884; GO:0005886; GO:0031594; GO:0032420; GO:0032432; GO:0051015; GO:0051017; GO:0051639; GO:0060348; GO:0098693; GO:0098699		mmu:102866;	16.7956	17.0661	17.1169	17.125	17.007	16.6215	16.7647	16.762	16.8357	16.8032
Gaa_P70699	-0.197957	1.55191	0.0193741	1.53424	0.749429	-1.21971	-1.01726	-0.873098	-0.591342	0.0444238	Gaa	Lysosomal alpha-glucosidase	P70699	1.06171	0.00278775	0.0450177	0.74718	sp|P70699|LYAG_MOUSE Lysosomal alpha-glucosidase OS=Mus musculus OX=10090 GN=Gaa PE=1 SV=2	FUNCTION: Essential for the degradation of glycogen in lysosomes. Has highest activity on alpha-1,4-linked glycosidic linkages, but can also hydrolyze alpha-1,6-linked glucans. {ECO:0000250|UniProtKB:P10253}.	SUBCELLULAR LOCATION: Lysosome {ECO:0000250|UniProtKB:P10253}. Lysosome membrane {ECO:0000250|UniProtKB:P10253}.		cardiac muscle contraction [GO:0060048]; diaphragm contraction [GO:0002086]; glycogen catabolic process [GO:0005980]; glycogen metabolic process [GO:0005977]; heart morphogenesis [GO:0003007]; locomotory behavior [GO:0007626]; lysosome organization [GO:0007040]; muscle cell cellular homeostasis [GO:0046716]; neuromuscular process controlling balance [GO:0050885]; neuromuscular process controlling…	alpha-1,4-glucosidase activity [GO:0004558]; carbohydrate binding [GO:0030246]; maltose alpha-glucosidase activity [GO:0032450]	lysosomal membrane [GO:0005765]; lysosome [GO:0005764]; membrane [GO:0016020]	GO:0002026; GO:0002086; GO:0003007; GO:0004558; GO:0005764; GO:0005765; GO:0005977; GO:0005980; GO:0006941; GO:0007040; GO:0007626; GO:0009888; GO:0016020; GO:0030246; GO:0032450; GO:0043181; GO:0046716; GO:0050884; GO:0050885; GO:0060048	R-MMU-6798695;R-MMU-70221;	mmu:14387;	12.3809	13.2747	12.4919	13.2657	12.8648	11.859	11.9624	12.036	12.1799	12.5047
Cmtm4_Q8CJ61	-1.35166	-0.554027	-0.510274	-0.290223	-1.01385	0.365677	1.4068	-0.414406	0.72292	1.63903	Cmtm4	CKLF-like MARVEL transmembrane domain-containing protein 4	Q8CJ61	1.02744	0.00279033	0.0450177	-0.350797	sp|Q8CJ61|CKLF4_MOUSE CKLF-like MARVEL transmembrane domain-containing protein 4 OS=Mus musculus OX=10090 GN=Cmtm4 PE=1 SV=1	FUNCTION: Acts as a backup for CMTM6 to regulate plasma membrane expression of PD-L1/CD274, an immune inhibitory ligand critical for immune tolerance to self and antitumor immunity. May protect PD-L1/CD274 from being polyubiquitinated and targeted for degradation. {ECO:0000250|UniProtKB:Q8IZR5}.	SUBCELLULAR LOCATION: Membrane {ECO:0000255}; Multi-pass membrane protein {ECO:0000255}.				integral component of membrane [GO:0016021]	GO:0016021		mmu:97487;	12.6397	12.8277	12.838	12.8899	12.7193	13.0445	13.29	12.8606	13.1287	13.3447
Tm4sf1_Q64302	1.27355	0.68225	0.794058	1.23875	-0.235197	-0.96632	-1.29097	-1.2252	-0.661805	0.390877	Tm4sf1	Transmembrane 4 L6 family member 1	Q64302	1.02574	0.00279848	0.0450177	0.296021	sp|Q64302|T4S1_MOUSE Transmembrane 4 L6 family member 1 OS=Mus musculus OX=10090 GN=Tm4sf1 PE=1 SV=1		SUBCELLULAR LOCATION: Membrane; Multi-pass membrane protein. Note=Colocalizes with SDCBP2 in the apical region of the cell. {ECO:0000250|UniProtKB:P30408}.		blastocyst formation [GO:0001825]		integral component of membrane [GO:0016021]; integral component of plasma membrane [GO:0005887]	GO:0001825; GO:0005887; GO:0016021		mmu:17112;	11.8974	11.7808	11.8029	11.8905	11.5999	11.4558	11.3918	11.4047	11.5158	11.7234
Psmb7_P70195	-0.0897774	1.00678	0.0407032	1.29758	1.55342	-0.415773	-0.922786	-0.16594	-1.4464	-0.857813	Psmb7	Proteasome subunit beta type-7	P70195	1.01516	0.00280391	0.0450177	0.245446	sp|P70195|PSB7_MOUSE Proteasome subunit beta type-7 OS=Mus musculus OX=10090 GN=Psmb7 PE=1 SV=1	FUNCTION: Component of the 20S core proteasome complex involved in the proteolytic degradation of most intracellular proteins. This complex plays numerous essential roles within the cell by associating with different regulatory particles. Associated with two 19S regulatory particles, forms the 26S proteasome and thus participates in the ATP-dependent degradation of ubiquitinated proteins. The 26S…	SUBCELLULAR LOCATION: Cytoplasm {ECO:0000250|UniProtKB:Q99436}. Nucleus {ECO:0000250|UniProtKB:Q99436}.		proteasomal protein catabolic process [GO:0010498]; proteasomal ubiquitin-independent protein catabolic process [GO:0010499]; proteasome-mediated ubiquitin-dependent protein catabolic process [GO:0043161]	endopeptidase activity [GO:0004175]; threonine-type endopeptidase activity [GO:0004298]	cytoplasm [GO:0005737]; cytosol [GO:0005829]; nucleoplasm [GO:0005654]; nucleus [GO:0005634]; proteasome complex [GO:0000502]; proteasome core complex [GO:0005839]; proteasome core complex, beta-subunit complex [GO:0019774]	GO:0000502; GO:0004175; GO:0004298; GO:0005634; GO:0005654; GO:0005737; GO:0005829; GO:0005839; GO:0010498; GO:0010499; GO:0019774; GO:0043161	R-MMU-1169091;R-MMU-1234176;R-MMU-1236978;R-MMU-174084;R-MMU-174154;R-MMU-174178;R-MMU-174184;R-MMU-187577;R-MMU-195253;R-MMU-202424;R-MMU-2467813;R-MMU-2871837;R-MMU-349425;R-MMU-350562;R-MMU-382556;R-MMU-450408;R-MMU-4608870;R-MMU-4641257;R-MMU-4641258;R-MMU-5358346;R-MMU-5607761;R-MMU-5607764;R-MMU-5610780;R-MMU-5610785;R-MMU-5632684;R-MMU-5658442;R-MMU-5668541;R-MMU-5676590;R-MMU-5687128;R-MM…	mmu:19177;	16.2946	16.4712	16.3156	16.5181	16.5593	16.242	16.1604	16.2823	16.076	16.1708
F11r_O88792	0.819916	0.744999	1.24084	1.51351	-0.221349	-1.42315	-0.697248	-0.536971	-0.553159	-0.887397	F11r	Junctional adhesion molecule A	O88792	1.01145	0.00281025	0.0450177	0.157644	sp|O88792|JAM1_MOUSE Junctional adhesion molecule A OS=Mus musculus OX=10090 GN=F11r PE=1 SV=2	FUNCTION: Seems to play a role in epithelial tight junction formation. Appears early in primordial forms of cell junctions and recruits PARD3 (PubMed:11447115). The association of the PARD6-PARD3 complex may prevent the interaction of PARD3 with JAM1, thereby preventing tight junction assembly (PubMed:11447115). Plays a role in regulating monocyte transmigration involved in integrity of epithelia…	SUBCELLULAR LOCATION: Cell junction, tight junction {ECO:0000269|PubMed:11036763}. Cell membrane {ECO:0000269|PubMed:11036763}; Single-pass type I membrane protein {ECO:0000269|PubMed:11036763}. Note=Localized at tight junctions of both epithelial and endothelial cells.		actomyosin structure organization [GO:0031032]; cell adhesion [GO:0007155]; cell-cell adhesion [GO:0098609]; cellular response to mechanical stimulus [GO:0071260]; epithelial cell differentiation [GO:0030855]; establishment of endothelial intestinal barrier [GO:0090557]; intestinal absorption [GO:0050892]; leukocyte cell-cell adhesion [GO:0007159]; memory T cell extravasation [GO:0035683]; negati…	integrin binding [GO:0005178]; PDZ domain binding [GO:0030165]; protein homodimerization activity [GO:0042803]	bicellular tight junction [GO:0005923]; cell-cell junction [GO:0005911]; cytoplasmic vesicle [GO:0031410]; integral component of membrane [GO:0016021]; plasma membrane [GO:0005886]; protein-containing complex [GO:0032991]; slit diaphragm [GO:0036057]; tight junction [GO:0070160]	GO:0001817; GO:0005178; GO:0005886; GO:0005911; GO:0005923; GO:0007155; GO:0007159; GO:0008360; GO:0009314; GO:0016021; GO:0030165; GO:0030855; GO:0031032; GO:0031410; GO:0032956; GO:0032991; GO:0034260; GO:0035025; GO:0035683; GO:0036057; GO:0042803; GO:0043547; GO:0045777; GO:0050892; GO:0051493; GO:0051497; GO:0070160; GO:0071260; GO:0072659; GO:0090557; GO:0090559; GO:0098609; GO:1901731; GO:…	R-MMU-202733;R-MMU-216083;R-MMU-2173791;R-MMU-420029;	mmu:16456;	13.9255	13.9183	13.966	13.9922	13.8253	13.7098	13.7796	13.795	13.7934	13.7613
Emcn_Q9R0H2	1.03434	0.0798978	-0.186549	0.939361	1.87915	-0.63192	-0.835414	-0.201902	-1.33885	-0.738113	Emcn	Endomucin	Q9R0H2	1.024	0.00281563	0.0450177	0.303289	sp|Q9R0H2|MUCEN_MOUSE Endomucin OS=Mus musculus OX=10090 GN=Emcn PE=1 SV=1	FUNCTION: Endothelial sialomucin, also called endomucin or mucin-like sialoglycoprotein, which interferes with the assembly of focal adhesion complexes and inhibits interaction between cells and the extracellular matrix. {ECO:0000250}.	SUBCELLULAR LOCATION: Membrane {ECO:0000305}; Single-pass type I membrane protein {ECO:0000305}.		angiogenesis [GO:0001525]; cell-cell adhesion [GO:0098609]; hematopoietic stem cell homeostasis [GO:0061484]; regulation of cell adhesion [GO:0030155]	carbohydrate binding [GO:0030246]	integral component of membrane [GO:0016021]; plasma membrane [GO:0005886]	GO:0001525; GO:0005886; GO:0016021; GO:0030155; GO:0030246; GO:0061484; GO:0098609		mmu:59308;	12.9993	12.8061	12.7522	12.98	13.1703	12.662	12.6208	12.7491	12.5189	12.6405
Mat2b_Q99LB6	0.662142	1.14947	1.04284	0.216465	0.673527	-1.64024	-1.00726	-0.847626	-0.898531	0.649217	Mat2b	Methionine adenosyltransferase 2 subunit beta	Q99LB6	1.02043	0.00281866	0.0450177	0.305295	sp|Q99LB6|MAT2B_MOUSE Methionine adenosyltransferase 2 subunit beta OS=Mus musculus OX=10090 GN=Mat2b PE=1 SV=1	FUNCTION: Regulatory subunit of S-adenosylmethionine synthetase 2, an enzyme that catalyzes the formation of S-adenosylmethionine from methionine and ATP. Regulates MAT2A catalytic activity by changing its kinetic properties, increasing its affinity for L-methionine. Can bind NADP (in vitro). {ECO:0000250|UniProtKB:Q9NZL9}.			one-carbon metabolic process [GO:0006730]; S-adenosylmethionine biosynthetic process [GO:0006556]	enzyme binding [GO:0019899]; methionine adenosyltransferase regulator activity [GO:0048270]	methionine adenosyltransferase complex [GO:0048269]; mitochondrion [GO:0005739]; nucleus [GO:0005634]	GO:0005634; GO:0005739; GO:0006556; GO:0006730; GO:0019899; GO:0048269; GO:0048270	R-MMU-156581;R-MMU-5689880;	mmu:108645;	15.2337	15.333	15.3113	15.1429	15.236	14.7644	14.8934	14.926	14.9156	15.2311
Marc2_Q922Q1	-0.0213133	0.398846	1.92357	1.15202	0.39713	-0.602282	-1.32507	-1.01092	-0.233354	-0.67862	Marc2	Mitochondrial amidoxime reducing component 2	Q922Q1	1.01313	0.00284	0.0451735	0.220196	sp|Q922Q1|MARC2_MOUSE Mitochondrial amidoxime reducing component 2 OS=Mus musculus OX=10090 GN=Marc2 PE=1 SV=1	FUNCTION: Catalyzes the reduction of N-oxygenated molecules, acting as a counterpart of cytochrome P450 and flavin-containing monooxygenases in metabolic cycles. As a component of prodrug-converting system, reduces a multitude of N-hydroxylated prodrugs particularly amidoximes, leading to increased drug bioavailability. May be involved in mitochondrial N(omega)-hydroxy-L-arginine (NOHA) reduction…	SUBCELLULAR LOCATION: Mitochondrion outer membrane {ECO:0000250|UniProtKB:P0C2C3}; Peripheral membrane protein {ECO:0000250|UniProtKB:P0C2C3}. Peroxisome {ECO:0000269|PubMed:17768142}.		cellular detoxification of nitrogen compound [GO:0070458]; nitrate metabolic process [GO:0042126]; nitric oxide biosynthetic process [GO:0006809]; oxidation-reduction process [GO:0055114]	molybdenum ion binding [GO:0030151]; molybdopterin cofactor binding [GO:0043546]; nitrate reductase activity [GO:0008940]; nitrite reductase activity [GO:0098809]; oxidoreductase activity, acting on other nitrogenous compounds as donors [GO:0016661]; pyridoxal phosphate binding [GO:0030170]	mitochondrial inner membrane [GO:0005743]; mitochondrial outer membrane [GO:0005741]; mitochondrion [GO:0005739]; peroxisome [GO:0005777]	GO:0005739; GO:0005741; GO:0005743; GO:0005777; GO:0006809; GO:0008940; GO:0016661; GO:0030151; GO:0030170; GO:0042126; GO:0043546; GO:0055114; GO:0070458; GO:0098809	R-MMU-211945;	mmu:67247;	16.8797	16.9397	17.1577	17.0474	16.9395	16.7966	16.6933	16.7382	16.8494	16.7857
Rhoa_Q9QUI0	0.520022	1.00486	1.31735	0.84572	0.161851	-1.21178	-1.85987	-0.40145	0.0157602	-0.392473	Rhoa	Transforming protein RhoA;Rho-related GTP-binding protein RhoC	Q9QUI0	1.01321	0.00287807	0.0452016	0.218695	sp|Q9QUI0|RHOA_MOUSE Transforming protein RhoA OS=Mus musculus OX=10090 GN=Rhoa PE=1 SV=1;sp|Q62159|RHOC_MOUSE Rho-related GTP-binding protein RhoC OS=Mus musculus OX=10090 GN=Rhoc PE=1 SV=2	FUNCTION: Small GTPase which cycles between an active GTP-bound and an inactive GDP-bound state. Mainly associated with cytoskeleton organization, in active state binds to a variety of effector proteins to regulate cellular responses such as cytoskeletal dynamics, cell migration and cell cycle. Regulates a signal transduction pathway linking plasma membrane receptors to the assembly of focal adhe…	SUBCELLULAR LOCATION: Cell membrane {ECO:0000250|UniProtKB:P61586}; Lipid-anchor {ECO:0000250|UniProtKB:P61586}; Cytoplasmic side {ECO:0000250|UniProtKB:P61586}. Cytoplasm, cytoskeleton {ECO:0000250|UniProtKB:P61586}. Cleavage furrow {ECO:0000250|UniProtKB:P61586}. Cytoplasm, cell cortex {ECO:0000250|UniProtKB:P61586}. Midbody {ECO:0000250|UniProtKB:P61586}. Cell projection, lamellipodium {ECO:00…		actin cytoskeleton organization [GO:0030036]; actin cytoskeleton reorganization [GO:0031532]; actin filament organization [GO:0007015]; alpha-beta T cell lineage commitment [GO:0002363]; androgen receptor signaling pathway [GO:0030521]; angiotensin-mediated vasoconstriction involved in regulation of systemic arterial blood pressure [GO:0001998]; apical junction assembly [GO:0043297]; apolipoprote…	GDP binding [GO:0019003]; GTPase activity [GO:0003924]; GTP binding [GO:0005525]; myosin binding [GO:0017022]; protein domain specific binding [GO:0019904]; protein kinase binding [GO:0019901]; Rho GDP-dissociation inhibitor binding [GO:0051022]	apical junction complex [GO:0043296]; axon [GO:0030424]; cell cortex [GO:0005938]; cell periphery [GO:0071944]; cell projection [GO:0042995]; cleavage furrow [GO:0032154]; cytoplasm [GO:0005737]; cytoplasmic vesicle [GO:0031410]; cytoskeleton [GO:0005856]; cytosol [GO:0005829]; dendritic spine [GO:0043197]; endosome [GO:0005768]; extrinsic component of cytoplasmic side of plasma membrane [GO:0031…	GO:0000902; GO:0001666; GO:0001998; GO:0002363; GO:0003100; GO:0003924; GO:0005525; GO:0005634; GO:0005737; GO:0005739; GO:0005768; GO:0005829; GO:0005856; GO:0005886; GO:0005938; GO:0006357; GO:0007010; GO:0007015; GO:0007155; GO:0007160; GO:0007163; GO:0007229; GO:0007266; GO:0007519; GO:0008360; GO:0009612; GO:0009749; GO:0010812; GO:0010975; GO:0010977; GO:0016020; GO:0016477; GO:0017022; GO:…	R-MMU-114604;R-MMU-193634;R-MMU-194840;R-MMU-198203;R-MMU-209563;R-MMU-2173791;R-MMU-392451;R-MMU-3928662;R-MMU-3928663;R-MMU-4086400;R-MMU-416482;R-MMU-416550;R-MMU-416572;R-MMU-4420097;R-MMU-5625740;R-MMU-5625900;R-MMU-5625970;R-MMU-5627117;R-MMU-5663220;R-MMU-5666185;R-MMU-5689896;R-MMU-6785631;R-MMU-6798695;R-MMU-8849471;R-MMU-8985586;	mmu:11848;	16.737	16.8058	16.8502	16.7832	16.6861	16.491	16.399	16.6061	16.6653	16.6074
[truncated: 3,651 more rows]

## Sheet: Phospho
	Normalized Log2 Intensity, Row Z Score														RSB-VehB																		Normalized Log2 Intensity
FEATURE	RS1B	RS2B	RS3B	RS4B	RS5B	VEH1B	VEH2B	VEH3B	VEH4B	VEH5B	GENE	PROTEIN	UNIPROT	MAXFC	P.VALUE	ADJ.P.VAL	LOGFC	FASTA_HEADERS	UNIPROT_FUNCTION	UNIPROT_CELLULAR_LOCATION	UNIPROT_DISEASE	GO_BIOLOGICAL_PROCESS	GO_MOLECULAR_FUNCTION	GO_CELLULAR_COMPONENT	GO_ID	REACTOMEID	KEGG_ID	PROTEINS	LOCALIZATION PROBABILITY	SITE PROBABILITIES	AMINO ACID	PEPTIDE SEQUENCE	RS1B.1	RS2B.1	RS3B.1	RS4B.1	RS5B.1	VEH1B.1	VEH2B.1	VEH3B.1	VEH4B.1	VEH5B.1
[truncated: 4,692 more rows]
